# Supplementary material for: European and multi-ancestry genome-wide association meta-analysis of atopic dermatitis highlights importance of systemic immune regulation
Source: Nat Commun. 2023 Oct 4;14:6172. doi: 10.1038/s41467-023-41180-2 (PMC10550990; doi:10.1038/s41467-023-41180-2)
Supplement: Supplementary file 4 — Supplementary Data 1-13 [file 41467_2023_41180_MOESM4_ESM.xlsx]

## Sheet: Supplementary Data 1
Supplementary Data 1. Previously associated variants. Association estimates are derived from the European discovery meta-analysis and the multi-ancestry meta-analysis of the current study. References are listed in the main text. The ancestries within which the associations were originally identified are reported.
						European discovery			Multi-ancestry discovery
Variant	Chr:position	Alleles (E/O)	Reported gene	Ancestry	Reference(s)	Beta	SE	P	P
rs6672420	1:25291010	(T/A)	RUNX3	European	Grosche et al, 20217	0.04	0.01	6.5e-08	4.71576e-10
rs12743520	1:93037112	(A/C)	EVI5	European	Tanaka et al, 2021 8	-0.0133355	0.00753189	0.076653	0.120984
rs188069315*	1:149090595	(A/G)	FLG	European	Sliz et al, 2021 6	NA	NA	NA	NA
rs1035121917*	1:146978090	(A/C)	FLG	European	Sliz et al, 2021 6	NA	NA	NA	NA
rs7512552	1:150265704	(C/T)	C1orf51;MRPS21	European	Paternoster et al, 2015 2	0.04	0.01	9e-08	4.31552e-09
rs187325802	1:151115787	(T/G)	FLG	European	Sliz et al, 2021 6	0.36	0.1	0.000239	NA
rs1427297901*	1:152120301	(AC/A)	TCHH;RPTN	Japanese	Tanaka et al, 2021 8	NA	NA	NA	NA
rs12123821	1:152179152	(T/C)	RPTN;HRNR	European	Grosche et al, 20217	0.34	0.02	4.05e-90	2.27606e-98
rs138726443*	1:152280023	(G/A)	FLG	European	Grosche et al, 20217	NA	NA	NA	NA
rs61816761	1:152285861	(A/G)	FLG	European	Grosche et al, 20217	0.85	0.04	3.25e-129	2.15091e-135
rs3126085	1:152300817	(G/A)	FLG	Chinese	Sun et al, 2011 12	-0.00348093	0.01	0.743785	0.447078
rs558269137*	1:152285081	(CACTG/C)	FLG	European	Sliz et al, 2021 6	NA	NA	NA	NA
rs189163698*	1:152356093	(T/C)	FLG-AS1;CRNN	Japanese	Tanaka et al, 2021 8	NA	NA	NA	NA
rs12144049	1:152440910	(C/T)	FLG	European	Schaarschmidt et al, 2015 9	0.117821	0.00746228	4.19e-56	1.88601e-61
rs61813875	1:152536650	(G/C)	CRCT1;LCE3E (FLG)	European	Paternoster et al, 2015 2	0.45	0.03	7.4e-69	7.76246e-82
rs72702813	1:152600854	(T/G)	LCE3A	European	Ellinghaus et al, 2013 14	0.275224	0.0173818	2.03e-56	3.05815e-58
rs538763482*	1:153302724	(A/G)	FLG	European	Sliz et al, 2021 6	NA	NA	NA	NA
rs4845373	1:154417829	(T/C)	IL6R	Japanese; European	Tanaka et al, 2021 8	0.0625982	0.00673523	1.58e-20	3.11077e-21
rs12730935	1:154419892	(G/A)	IL6R	European	Paternoster et al, 2015 2	-0.04	0.01	0.000133	1.86974e-05
rs61812598	1:154420087	(A/G)	IL6R	European	Grosche et al, 20217	0.06	0.01	1.12e-16	1.87592e-17
rs2228145	1:154426970	(C/A)	IL6R	European	Esparza-Gordillo et al, 2013 13	0.0626038	0.00758439	1.61e-16	2.67884e-17
rs12126142	1:154425456	(A/G)	IL6R	European	Sliz et al, 2021 6	0.06	0.01	1.21e-16	2.53019e-17
rs1214598	1:167426424	(A/G)	CD247	European	Tanaka et al, 2021 8	-0.0171492	0.00780382	0.028004	0.0213688
rs17371133	1:172828480	(C/A)	TNFSF4	European	Sliz et al, 2021 6	0.05	0.01	1.22e-11	3.19252e-10
rs6691738	1:173152036	(G/T)	TNFSF4	European	Grosche et al, 20217	0.06	0.01	1.05e-15	8.18864e-15
rs10174949	2:8442248	(A/G)	LINC00299	Japanese; European	Tanaka et al, 2021 8	-0.0450131	0.00710606	2.46e-10	3.05705e-11
rs891058	2:8442547	(A/G)	LINC00299	European	Grosche et al, 20217	-0.05	0.01	1.76e-10	2.20469e-11
rs10199605	2:8495097	(A/G)	LINC00299/−	European	Paternoster et al, 2015 2	-0.04	0.01	2.32e-08	1.14064e-07
rs4643526	2:61184651	(A/G)	PUS10	European	Paternoster et al, 2015 2	0.05	0.01	1.71e-08	4.76791e-09
rs7583364	2:71075077	(G/A)	CD207;LINC01143	Japanese	Tanaka et al, 2021 8	-0.0483335	0.00886383	5.06e-08	3.84907e-13
rs112111458	2:71100105	(G/A)	CD207;VAX2	European; Japanese	Paternoster et al, 2015 2	-0.06	0.01	5.5e-09	1.36416e-11
rs1861246	2:102966783	(C/T)	IL18RAP	European	Sliz et al, 2021 6	-0.09	0.01	1.06e-33	1.36862e-46
rs3917265	2:102778461	(C/T)	IL18R1;IL18RAP	European	Paternoster et al, 2015 2	0.01	0.01	0.4	0.24
rs72823628	2:102928617	(A/G)	IL1RL1	Japanese; European	Tanaka et al, 2021 8	-0.0393054	0.00946821	3.34e-05	2.11277e-07
rs13015714	2:102971865	(T/G)	IL18R1	Japanese	Hirota et al, 2012 10; Tanaka et al, 2021 8	-0.0945085	0.00771428	1.81e-34	5.58759e-48
rs3755274	2:103002395	(G/A)	IL18R1	European	Grosche et al, 20217	-0.09	0.01	6.85e-34	1.80183e-46
rs6419573	2:103027103	(C/T)	IL18R1;IL18RAP	European; Japanese	Paternoster et al, 2015 2	-0.08	0.01	2.39e-14	4.65161e-27
rs368124191	2:103042891	(A/AT)	IL18RAP	Japanese	Tanaka et al, 2021 8	0.0775	0.0123537	3.65e-10	7.70142e-24
rs759382	2:103094213	(C/A)	SLC9A4	European	Ellinghaus et al, 2013 14	0.08	0.01	2.56e-24	1.2973e-35
rs6720763	2:167992286	(C/T)	XIRP2	European	Schaarschmidt et al, 2015 9	-0.00254925	0.00933048	0.784712	0.551382
rs1057258	2:234115629	(T/C)	INPP5D	European; Japanese	Paternoster et al, 2015 2	-0.05	0.01	8.24e-06	3.42104e-08
rs34290285	2:242698640	(A/G)	D2HGDH	European	Grosche et al, 20217	-0.04	0.01	4.38e-06	1.0418e-05
rs4395418	3:18674098	(A/C)	SATB1-AS1;KCNH8	European	Grosche et al, 20217	-0.03	0.01	2.37e-05	0.000243328
rs79497729	3:33084911	(G/A)	GLB1	Japanese	Tanaka et al, 2021 8	0.0122348	0.0218795	0.576045	3.483e-12
rs6780220	3:33087200	(C/A)	GLB1	Japanese	Hirota et al, 2012 10; Tanaka et al, 2021 8	0.00459343	0.00841314	0.585092	4.09927e-09
rs7625909	3:53091164	(T/C)	SFMBT1;RFT1	European	Paternoster et al, 2015 2	0.03	0.01	4.19e-05	0.000178115
rs12634229	3:112376308	(C/T)	CCDC80	Japanese	Hirota et al, 2012 10; Tanaka et al, 2021 8	-0.00208617	0.014285	0.883859	9.16446e-12
rs56302621	3:112377617	(C/G)	CCDC80;LINC02042	Japanese	Tanaka et al, 2021 8	0.0117962	0.00778398	0.129632	2.52859e-11
rs1249910	3:112391174	(G/A)	CCDC80;CD200R1L	Japanese	Paternoster et al, 2015 2	0.01	0.01	0.13	9.53641e-11
rs72943976	3:112395039	(A/G)	CCDC80;LINC02042	Japanese	Tanaka et al, 2021 8	0.035288	0.0303183	0.244444	2.26653e-12
rs9868053	3:112647988	(T/C)	CD200R1	European	Grosche et al, 20217	-0.04	0.01	9.53e-11	3.1194e-09
rs6785012	3:141109348	(T/C)	ZBTB38	Japanese; European	Tanaka et al, 2021 8	0.00148789	0.00734906	0.839492	0.0422056
rs150979174*	3:144120828	(A/G)	DIPK2A	European	Sliz et al, 2021 6	NA	NA	NA	NA
rs5743614	4:38798935	(T/C)	TLR1	European	Tanaka et al, 2021 8	-0.00885005	0.0159465	0.578938	0.291823
rs7666843	4:123032641	(T/C)	IL2;IL21	European	Sliz et al, 2021 6	-0.11	0.03	3.57e-05	NA
rs62323874	4:123030583	(A/G)	TRPC3;KIAA1109	European	Grosche et al, 20217	0.05	0.01	4.41e-05	0.000724718
rs62323884	4:123050910	(G/T)	TRPC3;KIAA1109	European	Tanaka et al, 2021 8	0.0509583	0.0119834	2.14e-05	0.000452944
rs45605540	4:123141054	(C/T)	KIAA1109	European	Tanaka et al, 2021 8	0.0440504	0.00713545	6.89e-10	2.55786e-09
rs6827756	4:123184411	(C/T)	KIAA1109	European	Paternoster et al, 2015 2	-0.04	0.01	4.69e-10	9.81852e-09
rs13152362	4:123240619	(A/G)	KIAA1109	European	Paternoster et al, 2015 2	-0.04	0.01	1.34e-06	3.16401e-06
rs1904522	4:123336918	(A/G)	ADAD1	European	Grosche et al, 20217	0.05	0.01	4.54e-11	2.53857e-09
rs17389644	4:123497697	(A/G)	IL21	European	Ellinghaus et al, 2013 14	0.0454427	0.00841485	6.8e-08	1.60865e-06
rs34463936	5:35850149	(T/C)	SPEF2;IL7R	European	Grosche et al, 20217	-0.06	0.01	1.37e-15	9.25623e-14
rs7717955	5:35862841	(T/C)	IL7R	European	Tanaka et al, 2021 8	-0.0574649	0.00716357	1.09e-15	1.0582e-13
rs10214237	5:35883734	(C/T)	IL7R;CAPSL	European	Paternoster et al, 2015 2	-0.06	0.01	3.2e-15	9.69317e-14
rs7701890	5:109858821	(G/A)	TMEM232/SLC25A46	Chinese	Sun et al, 2011 12	0.03	0.01	0.014798	0.000249129
rs3853750	5:110154309	(C/T)	SLC25A46;TSLP	European	Grosche et al, 20217	0.05	0.01	9.84e-07	2.76793e-07
rs10073425	5:110163206	(T/C)	SLC25A46;TSLP	Japanese; European	Tanaka et al, 2021 8	-0.046854	0.00938674	6.11e-07	6.06703e-08
rs1438673	5:110467499	(T/C)	WDR36;CAMK4	Japanese; European	Tanaka et al, 2021 8	-0.0244607	0.00734658	0.000874	1.53136e-05
rs2897443	5:131929594	(T/G)	RAD50	European	Weidinger et al, 2013 4	0.08	0.01	9.13e-23	1.41966e-29
rs6871536	5:131969874	(C/T)	RAD50	European	Weidinger et al, 2013 4	0.08	0.01	9.9e-28	1.10256e-34
rs2158177	5:131984058	(G/A)	RAD50/IL13	European	Weidinger et al, 2013 4	0.08	0.01	1.37e-25	4.79787e-34
rs60153262	5:131984835	(T/C)	TH2LCRR	European	Grosche et al, 20217	0.14	0.02	1.68e-18	1.76565e-19
rs12188917	5:131991085	(T/C)	TH2LCRR	European; Japanese	Paternoster et al, 2015 2	-0.08	0.01	5.26e-15	2.58811e-23
rs1295686	5:131995843	(C/T)	IL13	European	Weidinger et al, 2013 4	-0.09	0.01	1.01e-27	1.97853e-41
rs20541	5:131995964	(G/A)	IL13	European	Weidinger et al, 2013 4	-0.1	0.01	1e-36	8.41857e-51
rs848	5:131996500	(A/C)	IL13	European	Ellinghaus et al, 2013 14	0.0891515	0.00843051	4.19e-26	1.11625e-38
rs11747814	5:132024166	(T/C)	IL4;KIF3A	European	Grosche et al, 20217	-0.07	0.01	8.56e-19	5.93931e-19
rs4705962	5:132028858	(C/T)	KIF3A	European	Paternoster et al, 2015 2	-0.08	0.01	1.02e-12	3.82418e-11
rs2897442	5:132076926	(T/C)	KIF3A	European	Paternoster et al, 2012 3	-0.06	0.01	3.04e-16	3.70878e-16
rs847	5:131996669	(C/T)	IL13	European	Sliz et al, 2021 6	-0.1	0.01	4.92e-35	8.73072e-49
rs114503346	5:172192350	(T/C)	LOC101928093;DUSP1	European	Grosche et al, 20217	-0.12	0.02	3.62e-11	1.28148e-10
rs2844594	6:31258393	(A/G)	HLA-C;HLA-B	European	Grosche et al, 20217	0.04	0.01	0.000149	0.00228587
rs28752924	6:31303922	(G/T)	HLA-B	European	Sliz et al, 2021 6	0.07	0.05	0.19	0.0010049
rs2251396	6:31364707	(A/G)	HLA-B	European	Weidinger et al, 2013 4	0.02	0.01	0.004262	0.02
rs41293864**	6:31466217	(C/T)	MICB	European; Japanese	Paternoster et al, 2015 2	0.14	0.04	0.000157	9.29333e-06
rs2844509	6:31510924	(G/A)	BAT1	European	Weidinger et al, 2013 4	-0.05	0.01	5.65e-10	4.8399e-12
rs9368699	6:31802541	(C/T)	C6orf48	European	Weidinger et al, 2013 4	-0.08	0.02	6.95e-06	1.18544e-07
rs12198173	6:32026808	(A/G)	TNXB	European	Weidinger et al, 2013 4	-0.07	0.01	9.43e-08	1.23939e-06
rs13199524	6:32066765	(T/C)	TNXB	European	Weidinger et al, 2013 4	-0.07	0.01	5.16e-08	3.19781e-07
rs12153855	6:32074804	(C/T)	CREBL1	European	Weidinger et al, 2013 4	-0.08	0.01	1.96e-11	2.79246e-10
rs176095	6:32158319	(A/G)	GPSM3	Japanese	Hirota et al, 2012 10; Tanaka et al, 2021 8	0.0528334	0.0090768	6.01e-09	4.58519e-16
rs3864302	6:32278792	(T/C)	LOC101929163	Japanese	Tanaka et al, 2021 8	-0.0354541	0.00849617	3.04e-05	7.65459e-18
rs6913664	6:32295874	(T/C)	LOC101929163	European	Grosche et al, 20217	-0.04	0.01	1.04e-07	8.37154e-09
rs2050190	6:32339076	(G/A)	LOC101929163	Japanese	Tanaka et al, 2021 8	-0.00682524	0.00772731	0.377089	1.98179e-10
rs4713555	6:32575524	(T/G)	HLA-DRB1;HLA-DQA1	European	Paternoster et al, 2015 2	-0.06	0.01	1.74e-13	1.07529e-20
rs13208697	6:32583274	(T/G)	HLA-DRB1;HLA-DQA1	European	Grosche et al, 20217	-0.09	0.01	8.72e-17	5.52644e-15
rs28383323	6:32594039	(A/G)	HLA-DQA1	European	Sliz et al, 2021 6	-0.13	0.03	1.26e-06	4.70863e-05
rs2485363	6:159506121	(G/T)	TAGAP	European	Johansson et al, 2019 5	-0.04	0.01	4.24e-10	1.99314e-08
rs4722404	7:3128789	(C/T)	CARD11	Japanese	Hirota et al, 2012 10; Tanaka et al, 2021 8	0.0124205	0.00651854	0.056734	1.54131e-05
rs3757723*	7:20391864	(T/C)	ITGB8	Japanese	Tanaka et al, 2021 8	NA	NA	NA	NA
rs6461503	7:20560996	(C/T)	ITGB8;ABCB5	European	Tanaka et al, 2021 8	-0.0110225	0.00647507	0.08869	0.0417633
rs11786685	8:81275835	(G/A)	ZBTB10	European	Sliz et al, 2021 6	-0.06	0.01	4.48e-20	2.68787e-19
rs6473226	8:81285759	(C/T)	MIR5708;ZBTB10	European	Grosche et al, 20217	-0.06	0.01	4.53e-20	1.58916e-19
rs6473227	8:81285892	(A/C)	MIR5708;ZBTB10	European; Japanese	Paternoster et al, 2015 2	-0.06	0.01	4.03e-20	1.57259e-19
rs6996614	8:126609868	(A/C)	TRIB1	European	Sliz et al, 2021 6	0.06	0.01	8.48e-17	1.01409e-17
rs12334935	8:126617990	(A/G)	TRIB1;LINC00861	European	Grosche et al, 20217	0.05	0.01	4.68e-16	1.37577e-15
rs10738626	9:22373457	(C/T)	DMRTA1	European	Schaarschmidt et al, 2015 9	-0.0117705	0.0067512	0.081252	0.339139
rs117137535	9:140500443	(A/G)	ARRDC1	European	Grosche et al, 20217	0.13	0.02	5.5e-08	1.99314e-08
rs3125788	9:140633275	(C/A)	EHMT1	Japanese	Tanaka et al, 2021 8	0.004239	0.0203285	0.834809	1.43412e-07
rs6602364	10:6038853	(C/G)	IL15RA;IL2RA	European	Paternoster et al, 2015 2	-0.04	0.01	1.36e-11	5.17203e-10
rs10795733	10:6043478	(A/C)	IL15RA;IL2RA	European	Grosche et al, 20217	-0.05	0.01	1.73e-14	1.10186e-12
rs12244238	10:6083239	(G/A)	IL2RA	European	Tanaka et al, 2021 8	0.033398	0.00657213	3.81e-07	2.42535e-06
rs62626322	10:6115639	(G/T)	IL2RA;RBM17	European	Grosche et al, 20217	0.09	0.01	2.33e-18	2.92199e-16
rs11259670	10:6622094	(T/C)	PRKCQ	European	Grosche et al, 20217	-0.04	0.01	8.56e-07	6.25695e-07
rs1409123	10:8582317	(A/T)	LINC00708;LOC105376398	Japanese; European	Tanaka et al, 2021 8	-0.0112784	0.00656739	0.085929	0.00789847
rs1444789	10:9064361	(T/C)	LOC105755953;LOC101928272	Japanese; European	Tanaka et al, 2021 8	-0.0260829	0.00799011	0.001103	9.01313e-06
rs4372325	10:64352849	(T/C)	ZNF365	European	Grosche et al, 20217	-0.05	0.01	3.17e-12	8.30969e-11
rs2944542	10:64369999	(G/C)	ZNF365	European; Japanese	Paternoster et al, 2015 2	0.05	0.01	1.75e-12	9.14385e-18
rs10995245	10:64391375	(A/G)	ZNF365	Japanese; European	Tanaka et al, 2021 8	0.0412773	0.00746496	3.29e-08	6.99611e-15
rs10995251	10:64398466	(C/T)	ZNF365	Japanese	Hirota et al, 2012 10; Tanaka et al, 2021 8	0.021287	0.00747757	0.004429	3.45626e-15
rs10995255	10:64402433	(A/G)	ZNF365	Japanese	Tanaka et al, 2021 8	-0.0225534	0.00754457	0.002806	3.471e-16
rs61865882	10:64572093	(C/T)	EGR2	Japanese	Tanaka et al, 2021 8	-0.0468285	0.0129928	0.000315	1.00382e-08
rs878860	11:7968359	(C/T)	OR10A3	Japanese	Hirota et al, 2012 10; Tanaka et al, 2021 8	0.000303046	0.00653748	0.963014	6.42864e-12
rs4312054	11:7977161	(G/T)	OR10A3;NLRP10	Japanese	Paternoster et al, 2015 2	-0.00119371	0.01	0.86	3.21328e-12
rs59039403*	11:7982432	(A/G)	NLRP10	Japanese	Tanaka et al, 2021 8	NA	NA	NA	NA
rs61878692	11:36332689	(A/G)	PRR5L	Japanese; European	Tanaka et al, 2021 8	0.0169781	0.00699599	0.015247	0.000592499
rs10836538	11:36365253	(T/G)	PRR5L	European	Grosche et al, 20217	-0.04	0.01	9.18e-11	1.10224e-13
rs2592555	11:36371757	(T/C)	PRR5L	European; Japanese	Paternoster et al, 2015 2	0.08	0.03	0.01	0.000416763
rs11033603	11:36434542	(A/G)	PRR5L	European	Sliz et al, 2021 6	0.17	0.02	1.86e-19	7.72331e-19
rs6484847	11:36427292	(T/C)	PRR5L	European	Grosche et al, 20217	0.06	0.01	1.28e-08	1.39624e-09
rs12295535	11:36432024	(T/C)	PRR5L	European; Japanese	Ellinghaus et al, 2013 14; Paternoster et al, 2015 2	0.18	0.02	2.72e-24	1.29971e-23
rs749848972*	11:65504053	(TAA/T)	RNASEH2C;AP5B1	Japanese	Tanaka et al, 2021 8	NA	NA	NA	NA
rs479844	11:65551957	(G/A)	OVOL1	European	Paternoster et al, 2012 3; Sliz et al, 2021 6	0.09	0.01	1.96e-33	1.38133e-35
rs10791824	11:65559266	(G/A)	OVOL1	European; Japanese	Paternoster et al, 2015 2; Grosche et al, 2021 7	0.09	0.01	1.34e-43	1.21462e-51
rs7130588	11:76270683	(G/A)	C11orf30	European	Weidinger et al, 2013 4	0.06	0.01	3.12e-17	4.81918e-16
rs2212434	11:76281593	(T/C)	C11orf30/LRRC32	European; Japanese	Paternoster et al, 2015 2	0.08	0.01	3.27e-32	5.40939e-36
rs7110818	11:76292575	(T/C)	C11orf30	European	Ellinghaus et al, 2013 14	0.0772351	0.00650372	1.72e-32	1.45727e-38
rs7936434	11:76293805	(C/G)	EMSY;LRRC32	European	Grosche et al, 20217	0.08	0.01	5.36e-34	3.49769e-39
rs11236791	11:76295598	(A/G)	EMSY;LRRC32	Japanese; European	Tanaka et al, 2021 8	0.0775377	0.0065027	9.64e-33	3.48043e-39
rs2155219	11:76299194	(T/G)	C11orf30/ LRRC32	European	Weidinger et al, 2013 4	0.08	0.01	2.49e-32	1.30573e-38
rs55646091	11:76299431	(A/G)	EMSY;LRRC32	European	Grosche et al, 20217	0.15	0.02	1.17e-21	6.44644e-21
rs11236809	11:76332210	(G/T)	EMSY;LRRC32	Japanese	Tanaka et al, 2021 8	0.0658608	0.0116686	1.7e-08	4.64496e-14
rs34455012*	11:76299845	(CCCAGTAT/C)	EMSY, LRRC32	European	Sliz et al, 2021 6	NA	NA	NA	NA
rs659529	11:111436896	(A/T)	LAYN;SIK2	European	Tanaka et al, 2021 8	0.00370612	0.00813647	0.648774	0.783086
rs10790275	11:118745884	(C/G)	DDX6;CXCR5	European	Grosche et al, 20217	0.05	0.01	5.46e-11	4.78804e-09
rs73018933	11:128174781	(A/G)	LINC02098;ETS1	Japanese; European	Tanaka et al, 2021 8	-0.0608632	0.00772	3.33e-15	2.43399e-16
rs7127307	11:128187383	(C/T)	LINC02098;ETS1	European; Japanese	Paternoster et al, 2015 2; Grosche et al, 2021 7	-0.05	0.01	1.29e-16	1.03506e-17
rs533495047	11:128163163	(AG/A)	ETS1	European	Sliz et al, 2021 6	-0.06	0.03	0.03	NA
rs183884396*	12:55356838	(A/G)	TESPA1	European	Sliz et al, 2021 6	NA	NA	NA	NA
rs4759228	12:56508409	(C/G)	STAT6	European	Sliz et al, 2021 6	0.04	0.01	9.56e-08	3.07538e-06
rs11171739	12:56470625	(T/C)	RPS26;ERBB3	European	Tanaka et al, 2021 8	-0.0384218	0.00737073	1.9e-07	5.77265e-06
rs1059513	12:57489709	(C/T)	STAT6	European	Tanaka et al, 2021 8	-0.0615138	0.0117212	1.57e-07	5.1505e-09
rs3947727	12:68652099	(T/C)	IL22, IFNG	European	Sliz et al, 2021 6	0.05	0.01	3.06e-15	9.96545e-16
rs2227491	12:68646521	(C/T)	IL22	European	Grosche et al, 20217	0.05	0.01	1.46e-15	1.89418e-15
rs2227483	12:68648176	(T/A)	IL22	European	Paternoster et al, 2015 2	0.05	0.01	5.25e-15	4.29744e-15
rs9540294	13:65564031	(G/T)	PCDH9	Korean	Kim et al, 2015 11	-0.00375103	0.00970703	0.699187	0.748981
rs12586305	14:35654467	(G/T)	PPP2R3C	European	Sliz et al, 2021 6	0.07	0.01	6.57e-15	2.01018e-14
rs2038255	14:35559126	(T/C)	PPP2R3C	European	Paternoster et al, 2015 2	0.06	0.01	1.2e-09	7.74108e-11
rs2143950	14:35572357	(T/C)	PPP2R3C	European; Japanese	Paternoster et al, 2015 2	0.0646673	0.00862001	6.57e-14	4.77617e-15
rs2415269	14:35638937	(A/G)	KIAA0391	European	Grosche et al, 20217	-0.06	0.01	2.26e-16	9.314e-15
rs11625265	14:64977321	(G/A)	ZBTB1	European	Grosche et al, 20217	0.03	0.01	3.77e-05	0.000306526
rs12888955	14:103256877	(A/G)	TRAF3	European	Grosche et al, 20217	0.04	0.01	1.01e-07	1.2863e-10
rs56101042	14:103256961	(G/A)	TRAF	Japanese; European	Tanaka et al, 2021 8	-0.0474711	0.00831913	1.18e-08	8.99597e-11
rs7146581	14:103301072	(T/C)	TRAF3	European; Japanese	Paternoster et al, 2015 2	-0.04	0.01	4.07e-05	2.73599e-06
rs10152544	15:67444747	(T/C)	SMAD3	Japanese; European	Tanaka et al, 2021 8	-0.0156366	0.00647412	0.015744	0.00764183
rs11857092	15:90960115	(C/T)	IQGAP1	Japanese; European	Tanaka et al, 2021 8	-0.0147584	0.00779655	0.058377	0.00133666
rs3862469	16:11194080	(T/C)	CLEC16A	European	Sliz et al, 2021 6	-0.07	0.01	3.64e-23	3.44948e-26
rs2041733	16:11229589	(C/T)	CLEC16A	European; Japanese	Paternoster et al, 2015 2; Grosche et al, 2021 7	-0.08	0.01	7.85e-36	5.80255e-40
rs112401631	17:38764524	(A/T)	CCR7;SMARCE1	European	Grosche et al, 20217	0.22	0.04	2.57e-09	6.05994e-09
rs9911533	17:38775476	(T/C)	CCR7;SMARCE1	Japanese; European	Tanaka et al, 2021 8	0.0390034	0.00670709	6.2e-09	1.72487e-10
rs12951971	17:40528131	(G/T)	STAT3	European	Paternoster et al, 2015 2	0.08	0.01	1.27e-12	4.72868e-11
rs9895436	17:43457886	(A/G)	MAP3K14;ARHGAP27	European	Grosche et al, 20217	0.03	0.01	6.16e-07	3.83303e-06
rs72833417	17:45873049	(T/A)	TBX21;OSBPL7	European	Grosche et al, 20217	0.06	0.01	1.62e-09	3.96357e-08
rs16948048	17:47440466	(G/A)	ZNF652	European; Japanese	Ellinghaus et al, 2013 14	0.0543367	0.00660187	1.96e-16	2.14507e-17
rs28406364	17:47454507	(T/C)	LOC102724596	European	Grosche et al, 20217	0.06	0.01	5.01e-18	2.34793e-18
rs35073649	17:47422510	(T/C)	ZNF652	European	Sliz et al, 2021 6	0.06	0.01	7.1e-17	3.6957e-15
rs11657987	17:76387363	(T/G)	PGS1	European	Paternoster et al, 2015 2	0.03	0.01	8.65e-05	0.00209588
rs1361355315*	18:27129070	(T/C)	DSC1	European	Sliz et al, 2021 6	NA	NA	NA	NA
rs28558565	18:46441597	(G/C)	CTIF;SMAD7	Japanese; European	Tanaka et al, 2021 8	0.0152935	0.0172272	0.374647	4.87054e-05
rs8086340	18:60006978	(G/C)	TNFRSF11A	Japanese; European	Tanaka et al, 2021 8	0.0307843	0.00657994	2.93e-06	2.69693e-09
rs188720898*	18:61613157	(A/T)	SERPINB7	European	Sliz et al, 2021 6	NA	NA	NA	NA
rs2164983	19:8650381	(A/C)	ACTL9	European	Paternoster et al, 2012 3	0.08	0.01	5.28e-20	1.02077e-22
rs35358447*	19:8791582	(A/AG)	ACTL9	European	Sliz et al, 2021 6	NA	NA	NA	NA
rs2918299	19:8787273	(T/C)	ADAMTS10;ACTL9	European	Grosche et al, 20217	0.08	0.01	7.71e-20	9.9308e-23
rs2918307	19:8789722	(G/A)	ADAMTS10/ACTL9	European; Japanese	Paternoster et al, 2015 2	0.08	0.01	3.83e-20	6.55166e-23
rs2766664	20:52171241	(G/A)	LOC101927770	European	Tanaka et al, 2021 8	-0.0292805	0.00767326	0.000137	0.00013362
rs2259735	20:52788314	(C/T)	CYP24A1	Japanese	Tanaka et al, 2021 8	-0.0150893	0.00745825	0.043075	3.32552e-07
rs73285914	20:52795539	(G/A)	CYP24A1;PFDN4	European	Grosche et al, 20217	-0.04	0.01	8.9e-05	0.00169323
rs2426500	20:52797581	(T/C)	CYP24A1;PFDN4	Japanese; European	Tanaka et al, 2021 8	0.0399734	0.00964072	3.42e-05	5.07369e-09
rs16999165	20:52807221	(A/G)	CYP24A1	Japanese	Hirota et al, 2012 10; Tanaka et al, 2021 8	-0.011292	0.0169868	0.50624	4.71016e-05
rs3848669	20:62300811	(T/G)	RTEL1	European	Sliz et al, 2021 6; Grosche et al, 2021 7	0.08	0.01	3.61e-19	1.25662e-21
rs4809219	20:62303115	(A/C)	RTEL1/TNFRSF6B	European; Japanese	Paternoster et al, 2015 2	0.08	0.01	5.88e-19	1.8048e-21
rs6010620	20:62309839	(G/A)	TNFRSF6B/ZGPAT	Chinese; European	Sun et al, 2011 12	0.08	0.01	3.24e-20	5.44093e-24
rs3208007	20:62322288	(C/T)	RTEL1	Japanese; European	Tanaka et al, 2021 8	0.0823281	0.00907263	1.22e-19	2.72913e-23
rs909341	20:62328742	(A/G)	TNFRSF6B	European	Ellinghaus et al, 2013 14	-0.08	0.01	2.03e-18	1.08021e-19
rs2075943	22:37319009	(A/G)	CSF2RB	European	Sliz et al, 2021 6	0.04	0.01	1.34e-10	9.90759e-09
rs4821564	22:37314290	(C/T)	CSF2RB	European	Grosche et al, 20217	0.05	0.01	1.31e-09	1.75849e-09
rs203319	22:41914593	(T/C)	ACO2	Japanese; European	Tanaka et al, 2021 8	0.0201604	0.00910614	0.026853	0.000654783
rs12211410	rs12743520	NA	TNXB	European	Weidinger et al, 2013 4	NA	NA	NA	NA
rs80199341	4:87860514	(G/T)	AFF1	Japanese	Tanaka et al, 2021 8	0.158347	0.0735399	0.031321	NA
rs200543403	2:71095410	(A/G)	CD207;LINC01143	Japanese	Tanaka et al, 2021 8	-0.105583	0.163181	0.517632	NA
Genome build = GRCh37 / hg19
* Variant has MAF < 0.01 or is an indel
** rs145809981 has merged into rs41293864
NA information not available
Association statistics (Beta and SE) and (unadjusted, two-sided) P-values are displayed for the fixed effects European-only meta-analysis and the replication analysis. P-values (unadjusted, two-sided) only are available from the MR-MEGA meta-regression multi-ancestry analysis.

## Sheet: Supplementary Data 2
Supplementary Data 2. Cohort details. Characteristics of the European discovery cohorts, multi-ancestry cohorts, and replication cohorts.
Study	Ancestry	Case definition	Age group (cut-off 16 years)	N cases	N controls	Genome build	Genotype reference panel	# variants after filtering
European cohorts
ALSPAC	European	Ever eczema until 14 years	Children	1620	3538	GRCh37 / hg19	HRC	7610436
B58C	European	Report of eczema until the age of 16 (self-, parental report or at investigation)	Children	918	4560	GRCh37 / hg19	1000G	7569824
BAMSE (wave1)	European	Self-report for ever doctor-diagnosed of eczema up to 16	Children	117	292	GRCh37 / hg19	HRC	5041971
BAMSE (wave2)	European	Self-report for ever doctor-diagnosed of eczema up to 16	Children	793	1165	GRCh37 / hg19	HRC	7205185
CAMP	European	Self-report of doctor diagnosed	Children	143	438	GRCh37 / hg19	1000G	5983863
CATSS	European	Self-report	Children	873	5306	GRCh37 / hg19	HRC	7524667
CHOP	European	Defined from electronic medical records	Children	673	1839	GRCh37 / hg19	HRC	5149873
COPSAC2000	European	Doctor-diagnoses according to the Hanifin-Rajka criteria	Children	73	263	GRCh37 / hg19	HRC	4715825
COPSAC2010	European	Doctor-diagnoses according to the Hanifin-Rajka criteria	Children	177	441	GRCh37 / hg19	HRC	5590066
DANFUND	European	Self-report	Adults	349	6213	GRCh37 / hg19	HRC	7713212
DNBC	European	Diagnosed and validated in telephone interviews at 1.5 years of age	Children	224	1407	GRCh37 / hg19	1000G	8407525 (no EMAC)
ECRHS	European	Ever itchy rash > 6 month duration AND current itchy rash in the last 12 months	Adults	300	1895	GRCh37 / hg19	1000G	8547162
Estonian Biobank	European	According to ICD-10 codes (L20)	Adults	16170	150546	GRCh37 / hg19	HRC	9353089
FINNGEN	European	According to ICD-10 codes (L20)	Adults	2921	132591	GRCh38/hg38	HRC	8912374
GENEVA_AFFY	European	Doctor diagnosed	Adults	517	1304	GRCh37 / hg19	HRC	6771517
GENEVA_ILLUMINA	European	Doctor diagnosed	Adults	529	1247	GRCh37 / hg19	HRC	6796742
GENUFADext (SHIP1)	European	Early onset eczema by age 2, doctor diagnosed	Children	417	1667	GRCh37 / hg19	HRC	7048045
GENUFAD (SHIP2)	European	Early onset eczema by age 2, doctor diagnosed	Children	259	1792	GRCh37 / hg19	HRC	6762934
GERA	European	At least two ICD-9 codes for atopic eczema (691.8) in medical records	Adults	1701	76137	GRCh37 / hg19	HRC	8170767
GINILISAsouth	European	Self-report for ever doctor-diagnosis of eczema up to 10	Children	442	865	GRCh37 / hg19	HRC	6138530
GINILISAnorth	European	Self-report for ever doctor-diagnosis of eczema up to 15	Children	219	363	GRCh37 / hg19	HRC	5546557
HEALTH cohorts	European	Self-report	Adults	265	4524	GRCh37 / hg19	HRC	7681584
HUNT	European	Self report or according to ICD-9, ICD-10 or ICPC-2 (691.8, L20, S87)	Adults	7001	42206	GRCh37 / hg19	HRC	8848391
INMA	European	Self-report	Children	404	440	GRCh37 / hg19	HRC	6006777
IOW	European	Eczema-status similar to ISAAC questions	Children	110	753	GRCh37 / hg19	HRC	7195682 (no EMAC)
MAAS	European	Doctor diagnosed	Children	257	355	GRCh37 / hg19	HRC	5563730
MAS_HNR	European	Doctor diagnosed by age 13	Children	104	379	GRCh37 / hg19	HRC	5216285
MoBa_children	European	Parental report of eczema up to 3	Children	5963	16750	GRCh37 / hg19	HRC	7506605
NCRC_ADC	European	Doctor diagnosed before the age of 2	Children	572	1797	GRCh37 / hg19	1000G	4439843
NFBC66	European	Self-report of eczema PLUS ever treated for it by a doctor	Children	1199	2266	GRCh37 / hg19	HRC	7777047
NTR	European	Parent-report of doctor-diagnosis for childhood or baby eczema	Children	270	1196	GRCh37 / hg19	1000G	6389501
PIAMA	European	Ever eczema until 16/17 years, based on parental report and doctor-diagnoses	Children	980	939	GRCh37 / hg19	HRC	5481826
The Raine Study	European	Self-report of doctor diagnosed	Children	404	972	GRCh37 / hg19	HRC	6601261
SALTY	European	Self-report	Adults	103	2254	GRCh37 / hg19	HRC	7253451
SAPALDIA_HRC	European	Self report: Atopic dermatitis or any other kind of skin allergy	Adults	1589	1134	GRCh37 / hg19	HRC	4322650
SAPALDIA_1000G	European	Self report: Atopic dermatitis or any other kind of skin allergy	Adults	533	443	GRCh37 / hg19	1000G	8103650 (no EMAC)
SWS	European	History of itchy skin condition PLUS at least three of the following: History of flexural involvement, History of asthma/hay fever , History of generalised dry skin, Onset of rash under the age of 2 , Visible flexural dermatitis identified by trained research nurses	Children	387	1386	GRCh37 / hg19	HRC	6820389
TwinGene	European	Self-report	Adults	111	3723	GRCh37 / hg19	HRC	7592690
TwinsUK	European	Self-report for ever having eczema and/or doctor diagnosed	Adults	831	2044	GRCh37 / hg19	HRC	7533670
UK Biobank	European	Self report or according to ICD-10 (L20)	Adults	10135	326899	GRCh37 / hg19	HRC	5835875
Multi-ancestry cohorts
GALA	Latino	Doctor diagnosed	Adults	368	3976	GRCh37 / hg19	HRC	9712589
Generation R	Multi-ethnic	Self-report of doctor diagnosed	Children	863	1273	GRCh37 / hg19	HRC	7705714
RIKEN	Japanese	Doctor-diagnoses according to the Hanifin-Rajka criteria	Adults	2385	209651	GRCh37 / hg19	1000G	8190828 (no EMAC)
SAGE	African American	Doctor diagnosed	Adults	416	1214	GRCh37 / hg19	HRC	11389974
SAPPHIRE	African American	Self-report	Children/Adults	422	844	GRCh37 / hg19	1000G	7170693
Replication cohorts
23andMe (European)	European	Self-report	Adults	387407	2517257	GRCh37 / hg19	HRC	replication
23andMe (African)	African	Self-report	Adults	25813	148202	GRCh37 / hg19	HRC	replication
23andMe (Latino)	Latino	Self-report	Adults	58909	466439	GRCh37 / hg19	HRC	replication

## Sheet: Supplementary Data 3
Supplementary Data 3. Conditional analyses. Crude association is the association of the secondary SNP unadjusted for the primary SNP (two-sided test). Conditional association is the association of the secondary SNP adjusted for the primary SNP.
							Crude association		Conditional association
Region	Primary SNP	Secondary SNP	Chr:position	EA	EAF	r2	OR (95% CI)	P	OR (95% CI)	P
1p36.22	rs61776548	rs7545953	1:12120304	T	0.33	0.01	0.97 (0.95-0.98)	2.19306e-07	0.97 (0.96-0.98)	8.45882e-06
1p36.11	rs7542147	rs2370230	1:25219141	C	0.47	0.008	1.04 (1.02-1.05)	6.62543e-07	1.04 (1.02-1.05)	2.20807e-07
1q21.2	rs187080438	rs10788873	1:150250534	A	0.51	0.01	1.04 (1.03-1.05)	3.02285e-09	1.04 (1.02-1.05)	1.67128e-07
1q21.3	rs115161931	rs78426848	1:150984035	T	0.02	0.001	1.21 (1.15-1.27)	4.32758e-13	1.21 (1.15-1.27)	1.26845e-13
1q21.3	rs115161931	rs41266634	1:151062876	T	0.01	0.001	1.67 (1.49-1.87)	2.98138e-19	1.67 (1.50-1.87)	1.95766e-19
1q21.3	rs149199808	rs77030116	1:151702987	T	0.01	0.2449	0.91 (0.82-1.01)	0.0675395	0.75 (0.67-0.83)	4.89715e-08
1q21.3	rs12123821	rs10494274	1:152132870	C	0.21	0.0082	1.07 (1.05-1.09)	1.7721e-13	1.09 (1.07-1.11)	1.4641e-20
1q21.3	rs12123821	rs200517893	1:152186209	A	0.83	0.004	1.22 (1.13-1.31)	1.6546e-07	1.21 (1.12-1.30)	4.86693e-07
1q21.3	rs61816766	rs61815525	1:152236681	C	0.85	0.17	0.97 (0.95-1.00)	0.0223965	1.06 (1.04-1.09)	3.82836e-06
1q21.3	rs12123821	rs61815559*	1:152271219	T	0.03	0.0008	1.64 (1.56-1.73)	5.20197e-88	1.67 (1.59-1.76)	6.6565e-94
1q21.3	rs12123821	rs61816761	1:152285861	A	0.02	0.0003	2.35 (2.19-2.52)	2.79755e-129	2.38 (2.22-2.55)	4.79689e-133
1q21.3	rs61816766	rs1933064	1:152301576	A	0.43	0.0199	1.05 (1.04-1.07)	4.46605e-12	1.08 (1.06-1.09)	4.28082e-23
1q21.3	rs61816766	rs941934	1:152390452	C	0.89	0.0032	0.87 (0.85-0.89)	4.15084e-36	0.86 (0.85-0.88)	1.47713e-41
1q21.3	rs61816766	rs72698976	1:152432282	T	0.99	0.0003	0.72 (0.62-0.83)	4.19023e-06	0.71 (0.61-0.82)	1.73947e-06
1q21.3	rs72702900	rs61812715	1:152711367	C	0.02	0.0012	1.78 (1.67-1.90)	1.16065e-71	1.80 (1.69-1.92)	9.11339e-74
1q21.3	rs61815704	rs149782252	1:152805566	G	0.96	0.7069	0.91 (0.87-0.95)	3.7861e-05	1.21 (1.15-1.26)	1.18788e-16
1q21.3	rs72702900	rs61814550	1:152859811	T	0.03	0.0015	1.53 (1.45-1.61)	2.96431e-60	1.54 (1.47-1.62)	6.02346e-63
1q21.3	rs821429	rs61801950	1:153160673	C	0.02	0.0011	1.69 (1.57-1.81)	1.19464e-43	1.69 (1.57-1.82)	2.31074e-44
1q21.3	rs12138773	rs146145921	1:153826739	T	0.01	0.0004	1.31 (1.17-1.47)	2.83159e-06	1.31 (1.17-.147)	2.18711e-06
1q24.3	rs859723	rs78037977	1:172715702	G	0.12	0.0515	0.96 (0.94-0.98)	0.000541872	0.95 (0.93-0.97)	1.30464e-07
1q24.3	rs859723	rs10912481	1:172824575	G	0.21	0.0367	0.97 (0.96-0.99)	0.000283644	0.96 (0.94-0.97)	8.39003e-08
3p24.3	rs4131280	rs62240975	3:18486173	A	0.25	0.01	0.97 (0.96-0.98)	4.09758e-05	0.96 (0.95-0.98)	1.1933e-06
3p24.3	rs13097010	rs4973727	3:18549716	T	0.08	0.003	0.95 (0.93-0.97)	5.2188e-06	0.95 (0.93-0.97)	4.1007e-06
3p22.3	rs35570272	rs62253769	3:32950778	A	0.1	0.0188	0.94 (0.92-0.96)	5.17658e-08	0.95 (0.93-0.97)	1.36562e-06
4q27	rs45599938	rs62321694	4:123262473	G	0.08	0.0584	1.05 (1.03-1.08)	2.66776e-05	1.07 (1.04-1.09)	2.68182e-08
5q31.1	rs20541	rs2299010	5:132042740	C	0.16	0.0911	1.08 (1.06-1.10)	4.06862e-19	1.04 (1.03-1.06)	2.60836e-07
6p21.33	rs41293876	rs9267502	6:31553194	A	0.07	0.1538	0.90 (0.88-0.93)	1.01092e-12	0.93 (0.90-0.96)	4.03665e-07
6p21.33	rs41293876	rs2844475	6:31583155	A	0.38	0.0062	1.04 (1.02-1.05)	2.88241e-05	1.04 (1.02-1.06)	2.24387e-06
6p21.32	rs12153855	rs204999	6:32109979	G	0.27	0.3523	0.94 (0.92-0.95)	2.32228e-14	0.96 (0.95-0.98)	9.77517e-06
6p21.32	rs28383330	rs9273045	6:32611982	C	0.22	0.0927	0.99 (0.96-1.01)	0.385233	1.08 (1.05-1.11)	3.46771e-09
6p21.32	rs9275218	rs1049130	6:32629859	A	0.45	0.4125	1.01 (0.99-1.03)	0.382178	1.05 (1.03-1.07)	4.46777e-06
6p21.32	rs28383330	rs17211861	6:32637121	A	0.17	0.0329	1.10 (1.08-1.13)	5.59763e-17	1.08 (1.06-1.11)	8.29928e-12
6q25.3	rs629326	rs150923331	6:159526596	A	0.01	0.0042	1.66 (1.37-2.02)	3.34249e-07	1.66 (1.37-2.02)	9.76667e-07
10p15.1	rs12251307	rs10795733	10:6043478	A	0.51	0.0447	0.95 (0.94-0.96)	1.66001e-14	0.96 (0.95-0.97)	2.73114e-09
11p13	rs28520436	rs191318	11:36371634	A	0.31	0.0054	0.95 (0.94-0.96)	1.67693e-12	0.95 (0.94-0.97)	2.79928e-11
11p12	rs10836538	rs62621409	11:36458997	G	0.05	0.0023	1.09 (1.06-1.13)	1.91372e-10	1.10 (1.07-1.13)	1.31733e-10
11q13.1	rs10791824	rs44205	11:65564786	A	0.31	0.0246	0.97 (0.96-0.99)	0.000709216	0.96 (0.95-0.97)	1.78029e-07
11q13.1	rs10791824	rs2231884	11:65656564	T	0.16	0.0737	1.03 (1.01-1.04)	0.00387112	1.05 (1.03-1.07)	5.70819e-08
12q15	rs2227491	rs10878796	12:68635196	G	0.63	0.0081	1.04 (1.02-1.05)	4.79308e-08	1.03 (1.02-1.05)	9.06933e-07
14q13.2	rs2415269	rs1048990	14:35761675	G	0.16	0.0556	1.07 (1.05-1.09)	2.09005e-15	1.05 (1.04-1.07)	3.73805e-09
16p13.13	rs2041733	rs62023594	16:11352930	A	0.28	0.0057	1.03 (1.02-1.05)	2.92147e-06	1.04 (1.02-1.05)	7.58353e-07
17q21.2	rs1358175	rs112401631	17:38764524	A	0.02	0.005	1.25 (1.16-1.34)	2.50183e-09	1.23 (1.14-1.32)	2.88983e-08
17q21.2	rs17881320	rs8071671	17:40403935	T	0.28	0	0.95 (0.94-0.97)	1.41565e-11	0.95 (0.94-0.97)	1.65172e-10
20q13.33	rs6062486	rs6089982	20:62401143	T	0.14	0.1284	0.92 (0.90-0.94)	7.1361e-18	0.95 (0.94-0.97)	1.64003e-06
Genome build = GRCh37 / hg19
* is also a multi-ancestry signal

## Sheet: Supplementary Data 4
Supplementary Data 4. Multi-ancestry results. 14 loci meeting genome-wide significance in the multi-ancestry MR-MEGA meta-analysis. Results from a multi-ancestry fixed effects meta-analysis (unadjusted two-sided P-values) are also shown including OR and 95% CI, along with the heterogeneity Q-statistic P-value. Replication estimates are derived from the RIKEN cohort for Japanese individuals, and 2…
			Multi-ancestry discovery					European discovery			RIKEN - Biobank Japan (N=118,287)		23andMe Latino replication (N=525,348)		23andMe African replication (N=174,015)		23andMe European replication (N=2,904,664)
Variant	Chr:position	Alleles (EAF)	MR-MEGA P	Fixed effects P	Fixed effects OR (95%CI)	Het Q P	N (studies)	OR (95% CI)	P	N (studies)	OR (95% CI)	P	OR (95% CI)	P	OR (95% CI)	P	OR (95% CI)	P
rs114059822*	1:19804918	T/G (0.03)	8.5929e-09	0.232	1.02 (0.98-1.07)	9e-06	783485 (29)	1.02 (0.98-1.07)	0.25	777005 (27)	N/A	N/A	0.96 (0.91-1.00)	0.07	1.12 (1.01-1.23)	0.03	1.00 (0.99-1.02)	0.87
rs9247	2:234113301	T/C (0.21)	1.92186e-09	6e-10	0.95 (0.93-0.97)	0.011	1002010 (41)	0.95 (0.95-0.97)	7.32e-08	780602 (36)	0.88 (0.83-0.94)	7.71316e-05	0.94 (0.93-0.96)	1.49453e-13	0.97 (0.94-0.99)	0.00723365	0.95 (0.94-0.95)	2.93e-51
rs9864845	3:112383847	A/G (0.37)	2.17244e-12	3e-06	0.93 (0.90-0.96)	6e-06	441348 (11)	1.02 (0.99-1.06)	0.22	228046 (9)	1.23 (1.16-1.3)	3.92433e-13	1.00 (0.98-1.01)	0.75	0.99 (0.97-1.01)	0.23	1.00 (0.99-1.00)	0.12
rs34599047	6:106629690	C/T (0.18)	3.31924e-08	1e-08	1.05 (1.03-1.06)	0.245	1083090 (43)	1.04 (1.03-1.06)	1.29e-07	861678 (38)	1.13 (1.01-1.27)	0.0338634	1.03 (1.01-1.05)	0.000717974	1.04 (1.01-1.08)	0.02	1.04 (1.03-1.04)	3.23e-22
rs7773987	6:135707486	T/C (0.60)	1.21977e-08	2e-07	0.97 (0.95-0.98)	0.086	1081160 (43)	0.97 (0.97-0.98)	9.57e-08	859747 (38)	0.95 (0.89-1.02)	0.148703	0.99 (0.98-1.00)	0.18	0.97 (0.95-0.99)	0.0019472	0.98 (0.97-0.98)	5.93e-13
rs118029610*	9:1894613	T/C (0.03)	1.89222e-08	0.0003	0.92 (0.88-0.96)	0.0009	752858 (15)	0.92 (0.88-0.96)	0.000297	748514 (14)	N/A	N/A	1.02 (0.97-1.07)	0.5	0.94 (0.84-1.06)	0.31	1.00 (0.98-1.02)	0.78
rs117137535	9:140500443	A/G (0.03)	1.99314e-08	3e-08	1.14 (1.09-1.19)	0.042	750269 (16)	1.14 (1.09-1.19)	5.5e-08	745925 (15)	N/A	N/A	1.13 (1.08-1.19)	3.99055e-07	1.06 (0.94-1.2)	0.33	1.09 (1.07-1.11)	9.25e-19
rs4312054	11:7977161	G/T (0.43)	3.21328e-12	0.06	0.99 (0.98-1.00)	0.667	1084480 (44)	1.00 (0.99-1.01)	0.86	863063 (39)	0.8 (0.75-0.84)	3.45799e-15	0.99 (0.98-1.01)	0.4	1.01 (0.99-1.04)	0.33	1.00 (1.00-1.01)	0.52
rs150113720*	11:83439186	G/C (0.02)	5.52287e-10	0.399	0.98 (0.93-1.03)	6e-06	842935 (22)	0.98 (0.93-1.03)	0.4	840799 (21)	N/A	N/A	0.94 (0.88-1.01)	0.1	1.11 (0.94-1.30)	0.22	1.02 (0.99-1.04)	0.14
rs115148078*	11:101361300	T/C (0.02)	5.90655e-09	0.483	0.98 (0.94-1.03)	0.0004	859876 (30)	0.98 (0.94-1.02)	0.37	851766 (27)	N/A	N/A	1.07 (1.02-1.12)	0.00368949	1.00 (0.93-1.08)	0.91	1.00 (0.98-1.02)	0.89
rs4262739	11:128421175	A/G (0.50)	2.20388e-08	4e-09	0.96 (0.95-0.98)	0.089	1081160 (43)	0.97 (0.96-0.98)	6.03e-07	859747 (38)	0.91 (0.86-0.97)	0.0022793	0.97 (0.96-0.98)	1.89122e-06	0.98 (0.96-1.00)	0.09	0.96 (0.96-0.97)	1.45e-36
rs1059513	12:57489709	C/T (0.08)	5.1505e-09	5e-08	0.94 (0.92-0.96)	0.083	1086390 (45)	0.94 (0.92-0.96)	1.57e-07	864982 (40)	0.95 (0.84-1.06)	0.333905	0.96 (0.94-0.98)	0.000305911	1.03 (0.99-1.07)	0.17	0.96 (0.95-0.97)	6.95e-16
rs4574025	18:60009814	T/C (0.55)	6.99823e-10	3e-09	1.04 (1.03-1.05)	0.435	1083880 (44)	1.03 (1.02-1.05)	1.48e-06	862470 (39)	1.13 (1.07-1.19)	2.66921e-05	1.02 (1.01-1.04)	0.000258919	1.04 (1.02-1.07)	1.24e-05	1.01 (1.01-1.02)	2.96e-05
rs6023002	20:52797237	C/G (0.52)	4.0544e-10	1e-08	1.04 (1.02-1.05)	0.098	1086390 (45)	1.03 (1.02-1.04)	2.26e-06	864982 (40)	1.17 (1.1-1.25)	2.81797e-07	1.02 (1.01-1.03)	0.00595606	1.02 (1.00-1.04)	0.07	1.03 (1.03-1.04)	3.22e-28
Alleles are reported as effect allele/other allele
Genome build = GRCh37 / hg19
* 4 SNPs didn't replicate in any of the 23andMe samples and on further examination of the discovery results appeared to be driven by a stochastic outlying result in a single European cohort.
N/A denotes variants that were not available in specific cohorts. Variants highlighted in bold replicated in at least one of the replication samples

## Sheet: Supplementary Data 5
Supplementary Data 5. Allele frequency comparison. Allele frequencies for the 81 variants from the European discovery meta-analysis, and the 14 variants from the multi-ancestry meta-analysis. Allele frequencies derived from the European discovery meta-analysis, RIKEN cohort and 23andMe for individuals of European, Japanese, Latino and African ancestry respectively.
			Effect allele frequencies
European variants	Chr:position	Alleles (EA/OA)	European Discovery	RIKEN - Biobank Japan	23andMe Latino replication	23andMe African replication
rs301804	1:8476441	G/C	0.3	N/A	0.23	0.14
rs61776548	1:12091024	A/G	0.47	0.39	0.45	0.28
rs7542147	1:25294618	C/T	0.49	N/A	0.59	0.32
rs12565349	1:110371629	G/C	0.15	0.34	0.16	0.19
rs187080438	1:150374354	T/C	0.03	N/A	0.02	0.01
rs146527530	1:151059196	G/T	0.02	N/A	0.01	0.01
rs115161931	1:151063299	T/C	0.04	N/A	0.02	0.01
rs71625130	1:151625094	A/G	0.04	N/A	0.02	0.01
rs149199808	1:151626396	T/C	0.03	N/A	0.02	0.01
rs12123821	1:152179152	T/C	0.05	N/A	0.03	0.01
rs61816766	1:152319572	C/T	0.03	N/A	0.02	0.01
rs72702900	1:152771963	A/T	0.04	N/A	0.02	0.01
rs61815704	1:152893891	G/C	0.02	N/A	0.01	0.01
rs821429	1:153275443	A/G	0.96	N/A	0.98	0.99
rs12138773	1:153843489	A/C	0.03	N/A	0.02	0.01
rs12133641	1:154428283	G/A	0.39	0.39	0.48	0.5
rs859723	1:172744543	A/G	0.36	0.93	0.46	0.29
rs11811788	1:173150727	G/C	0.24	0.07	0.28	0.36
rs891058	2:8442547	A/G	0.29	0.26	0.28	0.12
rs67766926	2:61163581	G/C	0.23	0.01	0.17	0.09
rs112111458	2:71100105	G/A	0.12	0.19	0.13	0.19
rs2272128	2:103039929	A/G	0.77	0.57	0.64	0.87
rs112385344	2:112275538	T/C	0.12	N/A	0.08	0.1
rs62193132	2:242788256	T/C	0.46	0.18	0.38	0.39
rs4131280	3:18414570	A/G	0.57	0.95	0.67	0.6
rs13097010	3:18673161	G/A	0.34	0.02	0.26	0.18
rs35570272	3:33047662	T/G	0.4	0.51	0.4	0.28
rs6808249	3:112648985	T/C	0.54	0.72	0.56	0.67
rs45599938	4:123386720	A/G	0.35	0.51	0.39	0.18
rs10833	4:142654547	C/T	0.65	0.93	0.73	0.83
rs148161264	5:14604521	G/C	0.04	N/A	0.02	0.01
rs10214273	5:35883986	G/T	0.27	0.19	0.22	0.13
rs17132590	5:110331899	C/T	0.1	0.31	0.2	0.52
rs7701967	5:130059750	A/G	0.31	N/A	0.26	0.1
rs4706020	5:130674076	A/G	0.34	N/A	0.28	0.11
rs4705908	5:131347520	A/G	0.37	N/A	0.33	0.33
rs20541	5:131995964	G/A	0.78	0.69	0.68	0.81
rs114503346	5:172192350	T/C	0.04	N/A	0.03	0.01
rs4532376	5:176774403	A/G	0.3	0.07	0.28	0.42
rs41293876	6:31466536	C/G	0.14	0.21	0.21	0.14
rs12153855	6:32074804	C/T	0.1	N/A	0.09	0.15
rs28383330	6:32600340	G/A	0.13	N/A	0.12	0.11
rs9275218	6:32658933	G/C	0.34	N/A	0.41	0.28
rs72925996	6:90930513	C/T	0.33	0.03	0.29	0.14
rs629326	6:159496713	T/G	0.61	0.23	0.47	0.47
rs989437	7:28830498	G/A	0.61	0.2	0.57	0.63
rs34215892	8:21767240	A/G	0.03	N/A	0.02	0.01
rs118162691	8:21767809	A/C	0.05	N/A	0.02	0.01
rs952558	8:81288734	T/A	0.62	0.41	0.57	0.41
rs6996614	8:126609868	A/C	0.53	0.35	0.53	0.54
rs7843258	8:141601542	C/T	0.82	0.53	0.83	0.79
rs7857407	9:33430707	A/T	0.4	0.37	0.36	0.31
rs10988863	9:102331281	C/A	0.21	0.06	0.19	0.11
rs12251307	10:6123495	T/C	0.12	0.22	0.14	0.27
rs10796303	10:6627700	C/T	0.66	0.65	0.61	0.44
rs10822037	10:64376558	C/T	0.61	0.51	0.68	0.86
rs10836538	11:36365253	T/G	0.34	0.73	0.35	0.23
rs28520436	11:36428447	T/C	0.03	0.03	0.02	0.01
rs10791824	11:65559266	G/A	0.58	0.43	0.46	0.45
rs7936323	11:76293758	A/G	0.46	0.38	0.45	0.38
rs11236813	11:76343427	C/G	0.1	0.32	0.12	0.15
rs17368814	11:102748695	G/A	0.13	0.03	0.09	0.04
rs11216206	11:116843425	G/C	0.07	0.32	0.1	0.11
rs10790275	11:118745884	C/G	0.8	0.88	0.82	0.62
rs7127307	11:128187383	C/T	0.49	0.57	0.48	0.41
rs705699	12:56384804	A/G	0.4	0.21	0.36	0.45
rs2227491	12:68646521	C/T	0.61	0.43	0.54	0.62
rs5005507	12:94611908	C/G	0.74	0.72	0.71	0.53
rs2415269	14:35638937	A/G	0.26	0.41	0.17	0.09
rs4906263	14:103249127	C/G	0.65	N/A	0.57	0.64
rs7147439	14:105523663	A/G	0.73	0.46	0.65	0.52
rs2041733	16:11229589	C/T	0.54	0.33	0.47	0.61
rs1358175	17:38757789	T/C	0.63	0.61	0.64	0.5
rs17881320	17:40485239	T/G	0.08	N/A	0.06	0.03
rs4247364	17:43336687	C/G	0.7	0.7	0.73	0.82
rs56308324	17:45819206	T/A	0.13	0.15	0.09	0.04
rs28406364	17:47454507	T/C	0.38	0.13	0.29	0.29
rs2542147	18:12775851	T/G	0.84	0.88	0.86	0.78
rs2967677	19:8789721	T/C	0.15	0.16	0.22	0.22
rs6062486	20:62302539	A/G	0.69	0.32	0.72	0.73
rs4821569	22:37316873	G/A	0.53	0.63	0.56	0.28
Multi-ancestry Discovery
rs114059822	1:19804918	T/G	0.03	N/A	0.02	0.01
rs9247	2:234113301	T/C	0.19	0.31	0.22	0.19
rs9864845	3:112383847	A/G	0.37	0.42	0.39	0.49
rs34599047	6:106629690	C/T	0.2	0.06	0.15	0.09
rs7773987	6:135707486	T/C	0.55	0.76	0.61	0.65
rs118029610	9:1894613	T/C	0.03	N/A	0.02	0.01
rs117137535	9:140500443	A/G	0.03	N/A	0.02	0.01
rs4312054	11:7977161	G/T	0.41	0.46	0.43	0.15
rs150113720	11:83439186	G/C	0.02	N/A	0.01	0.00421697
rs115148078	11:101361300	T/C	0.03	N/A	0.02	0.02
rs4262739	11:128421175	A/G	0.44	0.71	0.5	0.46
rs1059513	12:57489709	C/T	0.09	0.06	0.1	0.06
rs4574025	18:60009814	T/C	0.55	0.53	0.57	0.55
rs6023002	20:52797237	C/G	0.57	0.27	0.56	0.53
rs72943976	3:112395039		0.02	0.33
rs59039403	11:7982432		N/A	0.13
Genome build = GRCh37 / hg19

## Sheet: Supplementary Data 6
Supplementary Data 6. Genetic correlations. Results from LD score regression analysis against all phenotypes available on CTG-VL (5th Nov 2021). Genetic correlations (rg) with the corresponding two-sided p-values (p) are displayed for each tested trait with atopic dermatitis.
phenotype	rg	se	z	p	h2_obs	h2_obs_se	h2_int	h2_int_se	gcov_int	gcov_int_se	N	NCases	NControls	Cohort
Blood clot, DVT, bronchitis, emphysema, asthma, rhinitis, eczema, allergy diagnosed by doctor: Hayfever, allergic rhinitis or eczema	0.6217	0.03756	16.55	1.581e-61	0.06875	0.005734	1.058	0.0176	0.1157	0.01066	360527	277120	83407	UK Biobank
Blood clot, DVT, bronchitis, emphysema, asthma, rhinitis, eczema, allergy diagnosed by doctor: None of the above	-0.6571	0.04468	-14.71	5.613e-49	0.0724	0.006878	1.06	0.01911	-0.09417	0.01142	360527	116005	244522	UK Biobank
Non-cancer illness code, self-reported: eczema/dermatitis	0.9031	0.07	12.9	4.423e-38	0.008545	0.002438	1.016	0.008572	0.3895	0.00869	361141	351820	9321	UK Biobank
Blood clot, DVT, bronchitis, emphysema, asthma, rhinitis, eczema, allergy diagnosed by doctor: Asthma	0.5344	0.04511	11.85	2.249e-32	0.05231	0.005996	1.048	0.01707	0.05644	0.009854	360527	318894	41633	UK Biobank
Non-cancer illness code, self-reported: asthma	0.5293	0.04585	11.55	7.822e-31	0.05301	0.006103	1.048	0.01744	0.05873	0.009924	361141	319207	41934	UK Biobank
Age hay fever, rhinitis or eczema diagnosed	-0.5059	0.06007	-8.421	3.739e-17	0.09683	0.01199	1.012	0.009719	-0.02777	0.006934	72232	NA	NA	UK Biobank
Doctor diagnosed hayfever or allergic rhinitis	0.512	0.0614	8.34	7.436e-17	0.0726	0.009506	1.013	0.009826	0.0274	0.006913	91787	70883	20904	UK Biobank
Wheeze or whistling in the chest in last year	0.3044	0.03673	8.288	1.154e-16	0.06011	0.003399	1.034	0.01148	0.02628	0.008135	354523	280695	73828	UK Biobank
Doctor diagnosed asthma	0.4998	0.06133	8.149	3.659e-16	0.06199	0.009811	1.008	0.009284	0.03508	0.006817	91787	80070	11717	UK Biobank
Taking other prescription medications	0.3033	0.04087	7.421	1.165e-13	0.04579	0.002446	1.027	0.01003	0.02209	0.006122	360027	191034	168993	UK Biobank
Non-cancer illness code, self-reported: hayfever/allergic rhinitis	0.4411	0.05954	7.408	1.282e-13	0.02063	0.002373	1.02	0.009298	0.05611	0.00743	361141	340474	20667	UK Biobank
Treatment/medication code: ventolin 100micrograms inhaler	0.4367	0.06229	7.01	2.38e-12	0.01772	0.00234	1.009	0.009444	0.03759	0.00678	361141	350761	10380	UK Biobank
Age asthma diagnosed	-0.4759	0.06878	-6.92	4.532e-12	0.1399	0.03493	1.012	0.01103	-0.03887	0.006657	36955	NA	NA	UK Biobank
Long-standing illness, disability or infirmity	0.2388	0.03643	6.555	5.549e-11	0.05271	0.002604	1.025	0.01045	0.01567	0.006673	352798	238000	114798	UK Biobank
Age asthma diagnosed by doctor	-0.4954	0.08181	-6.056	1.395e-09	0.2126	0.04966	0.9935	0.006951	-0.01374	0.006055	11717	NA	NA	UK Biobank
Eosinophill percentage	0.2678	0.05035	5.318	1.049e-07	0.1401	0.01608	1.114	0.04292	0.03223	0.0113	349861	NA	NA	UK Biobank
Any ICDMAIN event in hilmo or causes of death	0.2105	0.04019	5.238	1.626e-07	0.02627	0.001947	1.026	0.009049	-0.005987	0.005255	361194	79185	282009	UK Biobank
Seen doctor (GP) for nerves, anxiety, tension or depression	0.1718	0.03321	5.174	2.289e-07	0.06271	0.002889	1.012	0.01072	-0.0005101	0.006182	358693	235165	123528	UK Biobank
Treatment/medication code: seretide 50 evohaler	0.373	0.07414	5.031	4.891e-07	0.01076	0.001642	0.9944	0.00742	0.0142	0.006345	361141	356872	4269	UK Biobank
Treatment/medication code: cetirizine	0.4901	0.09955	4.923	8.529e-07	0.005666	0.001482	1.001	0.007712	0.01686	0.005745	361141	357071	4070	UK Biobank
Treatment/medication code: becotide 50 inhaler	0.5473	0.1137	4.814	1.477e-06	0.005035	0.001356	1	0.00674	0.01447	0.005784	361141	358935	2206	UK Biobank
Eosinophil percentage of white cells	0.2421	0.05099	4.748	2.059e-06	0.1709	0.01961	0.9812	0.02843	0.01486	0.009307	173483	NA	NA	UK Biobank and INTERVAL
Treatment/medication code: salbutamol	0.5243	0.1128	4.649	3.335e-06	0.005306	0.001642	1.007	0.008205	0.01295	0.006226	361141	356836	4305	UK Biobank
Ever sought or received professional help for mental distress	0.2277	0.05033	4.524	6.073e-06	0.0705	0.00546	1.008	0.008439	0.001834	0.005356	117677	71657	46020	UK Biobank
Breathing problems during period of job: Yes	0.3518	0.07986	4.405	1.058e-05	0.03143	0.005676	1.007	0.00762	0.01894	0.0062	91149	84452	6697	UK Biobank
Other pulmonary diagnosis	0.2844	0.06487	4.384	1.166e-05	0.01239	0.001736	1.005	0.008201	0.002683	0.005687	361194	335813	25381	UK Biobank
Diseases of the respiratory system	0.2844	0.06487	4.384	1.166e-05	0.01239	0.001736	1.005	0.008201	0.002683	0.005687	361194	335813	25381	UK Biobank
Diagnoses - main ICD10: K29 Gastritis and duodenitis	0.3141	0.07172	4.379	1.192e-05	0.00907	0.001536	1.01	0.007604	-0.01773	0.005799	361194	348516	12678	UK Biobank
Eosinophil count	0.2342	0.05457	4.291	1.776e-05	0.1772	0.02032	0.98	0.0291	0.01697	0.009672	173481	NA	NA	UK Biobank and INTERVAL
COPD differential diagnosis	0.262	0.06132	4.273	1.93e-05	0.0132	0.001749	1.002	0.008112	0.002677	0.005846	361194	334484	26710	UK Biobank
ILD differential diagnosis	0.262	0.06132	4.273	1.93e-05	0.0132	0.001749	1.002	0.008112	0.002677	0.005846	361194	334484	26710	UK Biobank
Forced expiratory volume in 1-second (FEV1), predicted percentage	-0.1437	0.03377	-4.255	2.092e-05	0.1893	0.009484	1.036	0.009179	-0.004533	0.006549	117241	NA	NA	UK Biobank
Eosinophil percentage of granulocytes	0.2198	0.05179	4.243	2.201e-05	0.1648	0.01862	0.9773	0.02669	0.01292	0.00909	173482	NA	NA	UK Biobank and INTERVAL
Ever suffered mental distress preventing usual activities	0.2025	0.04811	4.21	2.554e-05	0.06494	0.005407	1.008	0.008324	-0.002376	0.006123	116527	77846	38681	UK Biobank
Sum eosinophil basophil counts	0.2342	0.05593	4.188	2.814e-05	0.1689	0.01889	0.9821	0.02635	0.01598	0.009531	173480	NA	NA	UK Biobank and INTERVAL
Age hayfever or allergic rhinitis diagnosed by doctor	-0.4084	0.09754	-4.187	2.822e-05	0.1056	0.02312	0.9996	0.006991	-0.01239	0.006078	20904	NA	NA	UK Biobank
Ever used hormone-replacement therapy (HRT)	0.172	0.04109	4.185	2.853e-05	0.04927	0.003509	0.9979	0.008481	-0.007553	0.005126	193606	117427	76179	UK Biobank
Symptoms, signs and abnormal clinical and laboratory findings, not elsewhere classified	0.1873	0.04483	4.179	2.933e-05	0.0309	0.002057	1.022	0.008786	-0.008597	0.006413	361194	263592	97602	UK Biobank
Neutrophil percentage of granulocytes	-0.2173	0.05231	-4.153	3.279e-05	0.1548	0.0168	0.9716	0.02349	-0.01167	0.008703	173506	NA	NA	UK Biobank and INTERVAL
Hearing difficulty/problems with background noise	0.1574	0.03841	4.097	4.194e-05	0.05122	0.002525	1.027	0.009283	0.007715	0.006509	353983	219842	134141	UK Biobank
Other gastritis (incl. Duodenitis)	0.3258	0.0797	4.088	4.352e-05	0.007554	0.00143	1.007	0.007308	-0.01979	0.005629	361194	350676	10518	UK Biobank
Breathing problems responsible for leaving job: No	0.3275	0.08105	4.041	5.321e-05	0.03349	0.005637	1.003	0.007674	0.01613	0.006238	91149	85737	5412	UK Biobank
Seen a psychiatrist for nerves, anxiety, tension or depression	0.1834	0.04583	4.001	6.316e-05	0.03223	0.002204	1.001	0.008424	0.004258	0.005708	359535	318302	41233	UK Biobank
Major Depresive Disorder	0.133	0.03366	3.952	7.763e-05	0.03867	0.001678	1.007	0.01377	0.01293	0.007332	480359	344901	135458	Psychiatric Genomics Consortium
Diagnoses - main ICD10: R07 Pain in throat and chest	0.2093	0.05398	3.878	0.0001055	0.0228	0.001858	1.007	0.008644	-0.01604	0.005658	361194	336664	24530	UK Biobank
Medication for pain relief, constipation, heartburn: Laxatives (e.g. Dulcolax, Senokot)	0.2859	0.07618	3.752	0.0001751	0.01073	0.001567	1.008	0.007466	-0.008437	0.006213	357084	346777	10307	UK Biobank
Ever depressed for a whole week	0.1868	0.05005	3.733	0.0001891	0.06324	0.005388	0.993	0.007728	-0.001348	0.005506	117705	54586	63119	UK Biobank
Other serious medical condition/disability diagnosed by doctor	0.178	0.04865	3.658	0.000254	0.02596	0.001915	1.015	0.008844	0.009085	0.006296	354588	281623	72965	UK Biobank
Tense / 'highly strung'	0.1336	0.03703	3.608	0.000308	0.05815	0.003039	0.9918	0.01059	0.0001087	0.006705	350159	289646	60513	UK Biobank
Non-cancer illness code, self-reported: depression	0.2102	0.05896	3.564	0.0003647	0.01735	0.001725	1.005	0.007913	-0.005517	0.006233	361141	340493	20648	UK Biobank
Destinations on discharge from hospital (recoded): Usual Place of residence	0.1588	0.04464	3.557	0.0003754	0.02327	0.001858	1.048	0.008779	0.0004245	0.005351	361058	128424	232634	UK Biobank
Chest pain or discomfort	0.1593	0.04501	3.54	0.0004006	0.0339	0.002218	1.015	0.008725	0.01169	0.006188	357507	301274	56233	UK Biobank
Ever had period extreme irritability	0.1908	0.05412	3.526	0.0004227	0.06021	0.005612	1.001	0.008005	-0.005832	0.005872	114422	84675	29747	UK Biobank
Multisite chronic pain	0.1171	0.03408	3.436	0.0005893	0.07412	0.003098	1.049	0.01238	0.002838	0.006451	380000	NA	NA	UK Biobank
Diagnoses - main ICD10: L03 Cellulitis	0.2741	0.08021	3.417	0.0006339	0.006699	0.001599	0.9951	0.00752	0.01092	0.005496	361194	356947	4247	UK Biobank
Ever unenthusiastic/disinterested for a whole week	0.1937	0.05707	3.393	0.0006908	0.05665	0.005941	1.002	0.008395	-0.01135	0.005621	115145	72771	42374	UK Biobank
Had menopause	0.1915	0.05705	3.356	0.00079	0.03873	0.006305	1.008	0.01272	-0.01484	0.005489	163184	43829	119355	UK Biobank
Neuroticism score	0.114	0.03421	3.332	0.0008629	0.1189	0.00594	1.019	0.01521	-0.005657	0.006905	293006	NA	NA	UK Biobank
Mineral and other dietary supplements: Calcium	0.2103	0.06328	3.323	0.0008911	0.01089	0.001781	1.005	0.007849	0.007117	0.004759	360016	335990	24026	UK Biobank
Bone fractures	0.1576	0.04764	3.308	0.0009397	0.02282	0.002107	1.019	0.00958	-0.005231	0.006012	426824	NA	NA	GEFOS
Medication for pain relief, constipation, heartburn: None of the above	-0.1138	0.03457	-3.293	0.000992	0.05422	0.002514	1.034	0.009873	0.007129	0.005437	357084	159041	198043	UK Biobank
Fractured/broken bones in last 5 years	0.1894	0.05782	3.275	0.001055	0.01708	0.002074	1.017	0.007998	-0.004109	0.005803	359241	324461	34780	UK Biobank
Treatment/medication code: salbutamol 100micrograms spacehaler	0.3434	0.1048	3.276	0.001055	0.005953	0.001464	0.9981	0.007228	0.01147	0.005796	361141	358874	2267	UK Biobank
Medication for pain relief, constipation, heartburn: Omeprazole (e.g. Zanprol)	0.1538	0.04734	3.248	0.001161	0.01861	0.001694	1.028	0.008351	-0.007356	0.005658	357084	335620	21464	UK Biobank
Non-cancer illness code, self-reported: irritable bowel syndrome	0.3026	0.09441	3.205	0.001349	0.006955	0.001689	1.015	0.007995	0.005527	0.005806	361141	352604	8537	UK Biobank
Fractured bone site(s): Other bones	0.3053	0.09609	3.177	0.001488	0.006977	0.001685	1.011	0.007577	-0.007082	0.005619	359241	340454	18787	UK Biobank
Illnesses of siblings: Severe depression	0.1917	0.06142	3.122	0.001797	0.01637	0.001766	0.9983	0.007288	0.005068	0.005321	279858	259751	20107	UK Biobank
Treatment/medication code: losartan	0.2193	0.07037	3.116	0.001834	0.009059	0.001741	0.9867	0.007766	-0.006462	0.005882	361141	357873	3268	UK Biobank
Pain type(s) experienced in last month: None of the above	-0.1134	0.0364	-3.115	0.001839	0.05384	0.00274	1.034	0.01009	0.006506	0.007019	360391	214877	145514	UK Biobank
Worrier / anxious feelings	0.1216	0.03913	3.107	0.001892	0.07902	0.004707	1.008	0.01349	-0.00383	0.007146	351833	152370	199463	UK Biobank
Treatment/medication code: beclometasone	0.4418	0.1436	3.077	0.002088	0.004405	0.001348	0.9923	0.00662	0.01211	0.006208	361141	357842	3299	UK Biobank
Illness, injury, bereavement, stress in last 2 years: Financial difficulties	0.1257	0.04096	3.068	0.002155	0.03329	0.002171	1.015	0.008812	-0.0006143	0.005683	358836	318166	40670	UK Biobank
Age at menopause (last menstrual period)	-0.1265	0.04142	-3.055	0.002251	0.1186	0.01244	1.012	0.01828	0.004518	0.005685	111593	NA	NA	UK Biobank
Hospital episode type: General episode	0.1613	0.05282	3.053	0.002264	0.01835	0.001999	1.109	0.008802	-0.001717	0.005945	361194	114387	246807	UK Biobank
Ever had prolonged feelings of sadness or depression	0.1759	0.05809	3.029	0.002457	0.0568	0.004909	1.001	0.007048	-0.004141	0.005781	117763	53389	64374	UK Biobank
Ever had prolonged loss of interest in normal activities	0.1501	0.04991	3.008	0.002627	0.06861	0.004885	0.9898	0.007792	-0.006092	0.005697	117727	71397	46330	UK Biobank
Hearing difficulty/problems: No	-0.129	0.043	-3	0.002702	0.04215	0.00266	1.013	0.009707	-0.005988	0.00667	346635	90797	255838	UK Biobank
Hearing difficulty/problems: Yes	0.1281	0.0431	2.973	0.002947	0.04222	0.002653	1.013	0.009715	0.005934	0.006674	346635	255925	90710	UK Biobank
Ever highly irritable/argumentative for 2 days	0.17	0.05759	2.953	0.00315	0.05287	0.005432	0.9916	0.008369	-0.006185	0.005787	117359	96429	20930	UK Biobank
Mood swings	0.1008	0.03427	2.942	0.003266	0.07141	0.003405	1.019	0.01117	-0.008962	0.006632	352604	193622	158982	UK Biobank
Breathing problems improved/stopped away from workplace or on holiday: No	0.3633	0.1242	2.925	0.003444	0.01505	0.005729	1.013	0.007411	0.01904	0.006208	91149	86767	4382	UK Biobank
Treatment/medication code: atorvastatin	-0.1809	0.06289	-2.876	0.004028	0.01208	0.002456	1.038	0.01396	0.004289	0.005419	361141	350336	10805	UK Biobank
Treatment/medication code: citalopram	0.3186	0.1112	2.866	0.004154	0.005068	0.001422	1.006	0.006594	-0.0141	0.005735	361141	354956	6185	UK Biobank
Activities undertaken to treat depression: Talking therapies, such as psychotherapy, counselling, group therapy or CBT	0.1518	0.05345	2.84	0.004507	0.05292	0.005523	1.003	0.008031	0.007408	0.005793	117763	91803	25960	UK Biobank
Back pain	0.1092	0.03852	2.835	0.004575	0.0426	0.002167	1.035	0.01122	-0.00518	0.006626	509000	364000	145000	UK Biobank + CHARGE
Mouth ulcers	0.1304	0.04609	2.829	0.004668	0.07862	0.009396	1.042	0.01373	0.00276	0.00585	461031	413940	47091	UK Biobank
Had other major operations	0.1831	0.06547	2.796	0.005169	0.03033	0.003262	1.01	0.007585	0.002613	0.006105	192470	63035	129435	UK Biobank
Guilty feelings	0.1159	0.04148	2.794	0.005202	0.05185	0.00268	1.005	0.009251	-0.004272	0.006377	351907	251779	100128	UK Biobank
Treatment/medication code: fluoxetine	0.2539	0.09174	2.768	0.005646	0.004268	0.001259	1.001	0.006253	7.195e-05	0.005379	361141	357001	4140	UK Biobank
Work hours - lumped category: Over 40 hours	0.307	0.1111	2.764	0.005713	0.02661	0.008115	1.008	0.008216	-0.0162	0.005674	75177	37976	37201	UK Biobank
Mouth/teeth dental problems: Mouth ulcers	0.1375	0.04975	2.763	0.005733	0.02805	0.003624	1.026	0.01169	0.001006	0.005591	359841	323010	36831	UK Biobank
Non-cancer illness code, self-reported: gastro-oesophageal reflux (gord) / gastric reflux	0.1739	0.06344	2.741	0.006121	0.01146	0.001698	1.018	0.007797	-0.005204	0.005505	361141	345931	15210	UK Biobank
Malignant neoplasm of colon	-0.3214	0.1174	-2.737	0.006192	0.004211	0.001581	1.007	0.007441	0.006367	0.005739	361194	358757	2437	UK Biobank
Malignant neoplasm of colon	-0.3214	0.1174	-2.737	0.006192	0.004211	0.001581	1.007	0.007441	0.006367	0.005739	361194	358757	2437	UK Biobank
Loneliness, isolation	0.1217	0.04462	2.729	0.006359	0.03636	0.002335	1.024	0.009316	-0.008329	0.006094	355583	292075	63508	UK Biobank
Sodium in urine	-0.09049	0.03317	-2.728	0.006366	0.07207	0.003029	1.024	0.00971	0.0008158	0.006126	350061	NA	NA	UK Biobank
Diagnoses - main ICD10: C18 Malignant neoplasm of colon	-0.2927	0.1074	-2.726	0.006416	0.004501	0.001558	1.005	0.007388	0.01001	0.005725	361194	358968	2226	UK Biobank
Used an inhaler for chest within last hour	0.3457	0.127	2.723	0.00647	0.003931	0.001659	1.004	0.007221	0.01384	0.005824	331625	329201	2424	UK Biobank
Ever smoked	0.08819	0.0327	2.697	0.007002	0.07742	0.003545	1.017	0.01197	-0.005735	0.006532	359751	141560	218191	UK Biobank
Smoking status: Previous	0.09242	0.03434	2.691	0.007116	0.05257	0.003061	1.027	0.01073	-0.00435	0.006148	359706	232156	127550	UK Biobank
Vitamin and mineral supplements: Vitamin E	0.2237	0.08314	2.691	0.007125	0.006466	0.001533	0.9996	0.007125	0.006217	0.005513	359245	348889	10356	UK Biobank
Non-cancer illness code, self-reported: chronic fatigue syndrome	0.297	0.1105	2.687	0.007206	0.004701	0.001452	0.9963	0.007354	-0.002127	0.005889	361141	359482	1659	UK Biobank
Treatment/medication code: temazepam	0.4843	0.1812	2.673	0.007525	0.002539	0.001299	0.9902	0.007072	-0.01199	0.005039	361141	360382	759	UK Biobank
Breathing problems improved/stopped away from workplace or on holiday: Yes	0.2759	0.1034	2.669	0.007611	0.02065	0.005638	0.9948	0.007012	0.009388	0.005538	91149	88461	2688	UK Biobank
ECG, load	-0.2706	0.1018	-2.658	0.007856	0.03481	0.00996	1.017	0.006811	0.01177	0.005358	53843	NA	NA	UK Biobank
Diseases of the genitourinary system	0.1489	0.0561	2.654	0.007951	0.01707	0.001766	1.017	0.007557	-0.002987	0.005256	361194	289574	71620	UK Biobank
Educational Attainment	0.0624	0.02355	2.65	0.008041	0.1133	0.003458	1.008	0.01894	0.01801	0.007031	766000	NA	NA	SSGAC
Breathing problems during period of job: No	-0.2545	0.09625	-2.644	0.008194	0.0215	0.005426	0.9888	0.007093	-0.01133	0.005634	91149	1558	89591	UK Biobank
Diagnoses - main ICD10: R31 Unspecified haematuria	0.2128	0.08053	2.642	0.008231	0.006415	0.001485	1.004	0.006858	-0.006231	0.005308	361194	349911	11283	UK Biobank
Mouth/teeth dental problems: None of the above	-0.1047	0.04003	-2.615	0.008921	0.03903	0.002154	1.018	0.008892	0.01082	0.005946	359841	141495	218346	UK Biobank
Medication related adverse effects	0.1547	0.05933	2.607	0.009124	0.01347	0.00181	1.004	0.008343	-0.00249	0.005756	361194	341100	20094	UK Biobank
Treatment/medication code: symbicort 100/6 turbohaler	0.3629	0.1396	2.599	0.009339	0.003702	0.001421	1.008	0.00768	0.008811	0.005914	361141	358892	2249	UK Biobank
Treatment/medication code: beclazone 50 inhaler	0.3563	0.1395	2.553	0.01068	0.003415	0.001495	0.984	0.00772	0.00695	0.005644	361141	360098	1043	UK Biobank
Pain type(s) experienced in last month: Hip pain	0.1311	0.05143	2.549	0.0108	0.02387	0.001966	1.024	0.008836	-0.001297	0.006196	360391	319891	40500	UK Biobank
Job coding: receptionist, doctor's/dental receptionist	0.553	0.2171	2.547	0.01085	0.01046	0.005591	0.9966	0.007798	-0.01347	0.005964	89866	89554	312	UK Biobank
Bipolar and major depression status: No Bipolar or Depression	-0.1372	0.05394	-2.544	0.01096	0.06613	0.006513	1	0.007181	0.003417	0.005555	86895	24070	62825	UK Biobank
Medication related adverse effects (Asthma/COPD)	0.1506	0.05984	2.517	0.01184	0.01255	0.001708	1.008	0.008542	-0.0008243	0.005705	361194	339488	21706	UK Biobank
Waking too early	-0.23	0.09152	-2.514	0.01195	0.04376	0.01111	1.003	0.007251	0.009045	0.005653	45540	11012	34528	UK Biobank
Never eat eggs, dairy, wheat, sugar: Wheat products	0.2808	0.1118	2.511	0.01205	0.003574	0.001441	1.005	0.007698	0.00201	0.005333	359777	350204	9573	UK Biobank
Injury, poisoning and certain other consequences of external causes	0.1372	0.05484	2.501	0.01239	0.01659	0.00186	1.006	0.00844	-0.009151	0.005892	361194	316398	44796	UK Biobank
Ever had bowel cancer screening	0.1627	0.06593	2.468	0.0136	0.01304	0.001688	1.019	0.007683	0.002737	0.005904	355353	240878	114475	UK Biobank
Difficulty concentrating during worst depression	0.2047	0.08327	2.458	0.01397	0.03272	0.008871	1.002	0.007274	-0.004563	0.004917	58750	12472	46278	UK Biobank
Ever manic/hyper for 2 days	0.2243	0.09134	2.456	0.01405	0.01798	0.004904	1	0.007607	-0.006688	0.005458	117155	110586	6569	UK Biobank
Bipolar and major depression status: Probable Recurrent major depression (severe)	0.2177	0.08869	2.454	0.01412	0.02555	0.006654	1.003	0.007943	0.003291	0.005428	86895	80591	6304	UK Biobank
Bipolar Disorder	0.106	0.04333	2.446	0.01443	0.7572	0.03946	1.031	0.00978	0.009271	0.006087	51710	31358	20352	PGC
Diseases of the eye and adnexa	0.158	0.06461	2.445	0.01449	0.01285	0.001585	1.008	0.007782	0.001003	0.005962	361194	331316	29878	UK Biobank
ECG, phase time	-0.2856	0.1173	-2.435	0.01489	0.02738	0.009654	1.011	0.007132	0.009615	0.005488	53998	NA	NA	UK Biobank
Manic/hyper symptoms: None of the above	0.2682	0.1104	2.43	0.01508	0.04971	0.0207	0.9954	0.00731	-0.01074	0.005446	24049	15377	8672	UK Biobank
Mental health problems ever diagnosed by a professional: Depression	0.1329	0.0547	2.43	0.0151	0.04954	0.005087	1.009	0.007774	0.004563	0.005685	117782	92695	25087	UK Biobank
Childhood asthma (age<16)	0.3186	0.1316	2.422	0.01545	0.004044	0.001511	1.007	0.007584	0.01692	0.006022	361194	359201	1993	UK Biobank
Asthma	0.3186	0.1316	2.422	0.01545	0.004044	0.001511	1.007	0.007584	0.01692	0.006022	361194	359201	1993	UK Biobank
Asthma	0.3186	0.1316	2.422	0.01545	0.004044	0.001511	1.007	0.007584	0.01692	0.006022	361194	359201	1993	UK Biobank
Diagnoses - main ICD10: I25 Chronic ischaemic heart disease	0.09688	0.04034	2.401	0.01633	0.02962	0.002874	1.012	0.01024	-0.01037	0.00576	361194	348425	12769	UK Biobank
Illnesses of mother: Chronic bronchitis/emphysema	0.1533	0.06388	2.4	0.01639	0.01247	0.001809	1.003	0.007349	0.005651	0.005945	331008	311371	19637	UK Biobank
Illness, injury, bereavement, stress in last 2 years: None of the above	-0.1183	0.04959	-2.386	0.01703	0.02394	0.001794	0.9999	0.006979	0.002852	0.005815	358836	156985	201851	UK Biobank
Medication for pain relief, constipation, heartburn: Paracetamol	0.09829	0.04122	2.385	0.01709	0.03976	0.002312	1.03	0.008782	0.0005149	0.005815	357084	279148	77936	UK Biobank
Hernia	0.1346	0.0565	2.382	0.01723	0.01604	0.002158	1.02	0.009347	-0.005804	0.005617	361194	334997	26197	UK Biobank
Smoking status: Never	-0.07085	0.02977	-2.38	0.01731	0.09955	0.004208	1.032	0.01187	0.009049	0.006692	359706	164638	195068	UK Biobank
Schizophrenia	0.07194	0.03027	2.376	0.01749	0.2431	0.009724	1.052	0.01279	0.01151	0.006233	150064	113075	36989	PGC
Lymphocyte percentage of white cells	-0.09393	0.03965	-2.369	0.01785	0.1465	0.0121	0.9755	0.01758	-0.007039	0.006639	173496	NA	NA	UK Biobank and INTERVAL
Hair/balding pattern: Pattern 1	0.08322	0.03519	2.365	0.01801	0.2049	0.0272	1.093	0.03393	-0.002658	0.007569	165649	112573	53076	UK Biobank
Certain infectious and parasitic diseases	0.369	0.1568	2.353	0.01863	0.002626	0.001513	1.006	0.007672	-0.006683	0.005111	361194	351897	9297	UK Biobank
Asthma, hospital admissions 1	0.3081	0.1313	2.347	0.01894	0.004044	0.001531	1.007	0.007679	0.0174	0.006084	361194	359208	1986	UK Biobank
Ischaemic heart disease, wide definition	0.09129	0.03891	2.346	0.01897	0.03524	0.002954	1.017	0.01105	-0.01354	0.00562	361194	340337	20857	UK Biobank
COPD, early/later onset	0.2015	0.08599	2.343	0.01911	0.007061	0.001564	1.001	0.007592	-0.003071	0.0053	361194	359297	1897	UK Biobank
Back pain for 3+ months	0.1766	0.07578	2.33	0.0198	0.04283	0.005924	0.9844	0.007501	-0.006694	0.006092	90555	28500	62055	UK Biobank
Treatment/medication code: isosorbide mononitrate	0.297	0.1276	2.329	0.01987	0.003292	0.001354	0.9966	0.007211	-0.01699	0.005359	361141	359952	1189	UK Biobank
Polyunsaturated fat	0.2995	0.1301	2.302	0.02131	0.02064	0.01039	1.002	0.007142	-0.0145	0.005418	51453	NA	NA	UK Biobank
Miserableness	0.08151	0.03544	2.3	0.02143	0.06482	0.00351	1.011	0.01172	-0.005096	0.006288	355182	203430	151752	UK Biobank
Diagnoses - main ICD10: R32 Unspecified urinary incontinence	0.3035	0.1322	2.296	0.02166	0.003383	0.001392	0.99	0.007695	-0.01186	0.005959	361194	360323	871	UK Biobank
Mental health problems ever diagnosed by a professional: Panic attacks	0.185	0.08085	2.289	0.02211	0.0217	0.004573	1.009	0.008518	-0.003676	0.005144	117722	111204	6518	UK Biobank
Diagnoses - main ICD10: T50 Poisoning by diuretics and other and unspecified drugs, medicaments and biological substances	0.2945	0.1289	2.285	0.02233	0.003081	0.001499	0.9895	0.007668	-0.01264	0.005442	361194	360963	231	UK Biobank
Coronary atherosclerosis	0.08954	0.03936	2.275	0.02293	0.03077	0.002971	1.013	0.01045	-0.01048	0.005604	361194	346860	14334	UK Biobank
Lymphocyte percentage	-0.07996	0.03524	-2.269	0.02328	0.1417	0.01212	1.152	0.03389	-0.01776	0.008313	349861	NA	NA	UK Biobank
NA	-0.2083	0.09199	-2.264	0.02357	0.005997	0.001541	1.003	0.006835	0.005051	0.005667	361194	355504	5690	UK Biobank
Malignant neoplasm of digestive organs	-0.2083	0.09199	-2.264	0.02357	0.005997	0.001541	1.003	0.006835	0.005051	0.005667	361194	355504	5690	UK Biobank
Diagnoses - main ICD10: I20 Angina pectoris	0.1448	0.06411	2.258	0.02392	0.01434	0.001851	0.9993	0.008675	-0.01291	0.005702	361194	354948	6246	UK Biobank
Diagnoses - main ICD10: K44 Diaphragmatic hernia	0.2161	0.09571	2.258	0.02393	0.005926	0.001361	1.012	0.006998	-0.006197	0.005687	361194	353152	8042	UK Biobank
ECG, phase duration	-0.233	0.1038	-2.246	0.0247	0.03395	0.01059	1.007	0.007202	0.009866	0.005354	53998	11289	42709	UK Biobank
Vitamin and mineral supplements: None of the above	-0.1035	0.04609	-2.245	0.02477	0.03003	0.001937	0.9993	0.007958	-0.003033	0.005934	359245	112464	246781	UK Biobank
Vitamin and mineral supplements: Vitamin D	0.2164	0.0968	2.236	0.02536	0.004268	0.001508	1.006	0.007246	-0.0008786	0.005843	359245	345558	13687	UK Biobank
Vitamin B6	0.271	0.1212	2.235	0.02543	0.02859	0.00953	1.009	0.00692	-0.01023	0.005744	51453	NA	NA	UK Biobank
Diagnoses - main ICD10: H26 Other cataract	0.1545	0.06928	2.23	0.02573	0.01049	0.001817	1.006	0.008085	-0.000852	0.005602	361194	349888	11306	UK Biobank
Coffee type: Instant coffee	-0.09881	0.04436	-2.228	0.0259	0.03421	0.002781	1.023	0.008926	-0.008909	0.005543	283449	125063	158386	UK Biobank
Pain type(s) experienced in last month: Back pain	0.09005	0.04045	2.226	0.02601	0.03815	0.002156	1.025	0.01002	-0.003814	0.006268	360391	269042	91349	UK Biobank
Treatment/medication code: paracetamol	0.1	0.04497	2.224	0.02616	0.03112	0.002064	1.029	0.008815	0.003511	0.005805	361141	294794	66347	UK Biobank
Pulse wave peak to peak time	-0.1602	0.07233	-2.215	0.02674	0.03025	0.004701	1.001	0.00785	0.009189	0.005828	118787	NA	NA	UK Biobank
Leg pain on walking	0.1056	0.04775	2.212	0.02698	0.05558	0.004907	1.015	0.007226	-0.001824	0.005258	118905	92908	25997	UK Biobank
Non-cancer illness code, self-reported: hiatus hernia	0.1461	0.06637	2.201	0.02773	0.009298	0.0015	1.03	0.007086	-0.008957	0.00563	361141	352801	8340	UK Biobank
Risk taking	0.08301	0.03773	2.2	0.0278	0.05571	0.002841	1.01	0.01017	-0.001942	0.005883	348549	258049	90500	UK Biobank
Diagnoses - main ICD10: J44 Other chronic obstructive pulmonary disease	0.1926	0.08794	2.19	0.0285	0.006962	0.001537	1.002	0.007625	-0.002967	0.005391	361194	359663	1531	UK Biobank
Milk type used: Soya	0.1692	0.07742	2.186	0.02881	0.009785	0.001675	1.018	0.007815	-0.006078	0.005726	360806	347659	13147	UK Biobank
Treatment/medication code: omeprazole	0.1113	0.05112	2.177	0.02949	0.01523	0.001592	1.035	0.007769	-0.001681	0.005635	361141	340022	21119	UK Biobank
Cough on most days	0.1471	0.06766	2.173	0.02975	0.04727	0.006043	0.9996	0.007872	0.001907	0.005704	91787	79194	12593	UK Biobank
Milk type used: Semi-skimmed	-0.1315	0.06056	-2.171	0.0299	0.01326	0.001538	1.007	0.006824	-0.00892	0.006137	360806	125936	234870	UK Biobank
Episodal and paroxysmal disorders	0.1839	0.08502	2.163	0.03051	0.006872	0.001311	0.999	0.007889	0.001188	0.006028	361194	355776	5418	UK Biobank
Treatment/medication code: prednisolone	0.2912	0.1347	2.162	0.03061	0.002848	0.001457	0.9967	0.006931	0.004973	0.005318	361141	359038	2103	UK Biobank
Suggestive for eosinophilic asthma	0.2235	0.1034	2.161	0.03069	0.00612	0.001601	1.009	0.008438	0.003084	0.006304	361194	358892	2302	UK Biobank
Diagnoses - main ICD10: J45 Asthma	0.3078	0.1425	2.16	0.0308	0.003308	0.001575	1.007	0.007686	0.01805	0.005896	361194	359501	1693	UK Biobank
Diseases of the skin and subcutaneous tissue	0.2235	0.1039	2.152	0.03139	0.005533	0.001516	1.012	0.007732	0.01136	0.005787	361194	334120	27074	UK Biobank
Suffer from 'nerves'	0.086	0.03997	2.152	0.03142	0.04545	0.003009	0.9921	0.01024	-0.002539	0.005997	348082	274144	73938	UK Biobank
Paingul gums	0.1859	0.08643	2.151	0.03146	0.04988	0.01106	1.027	0.007628	0.0006714	0.006007	461031	447720	13311	UK Biobank
#Spondylopathies	0.1853	0.08626	2.148	0.03168	0.007349	0.001775	1.002	0.007799	-0.001962	0.005642	361194	356801	4393	UK Biobank
Job SOC coding: Receptionists	0.2644	0.1237	2.138	0.0325	0.01192	0.005465	0.9941	0.007496	-0.002351	0.005338	91149	89742	1407	UK Biobank
Leg pain when walking uphill or hurrying	0.2094	0.09794	2.138	0.03254	0.07438	0.02136	0.9863	0.007799	-0.005128	0.005807	24997	7747	17250	UK Biobank
Non-cancer illness code, self-reported: malabsorption/coeliac disease	0.2204	0.1035	2.13	0.03316	0.005064	0.001584	1.015	0.007485	0.01054	0.005738	361141	359554	1587	UK Biobank
Diagnoses - main ICD10: J34 Other disorders of nose and nasal sinuses	0.4481	0.2113	2.12	0.03399	0.00195	0.001381	1.012	0.007881	-0.001759	0.006035	361194	356756	4438	UK Biobank
Illnesses of mother: High blood pressure	0.1001	0.0473	2.116	0.03437	0.02839	0.002402	1.015	0.009982	-0.006963	0.005938	333048	231360	101688	UK Biobank
Blood clot, DVT, bronchitis, emphysema, asthma, rhinitis, eczema, allergy diagnosed by doctor: Emphysema/chronic bronchitis	0.1384	0.06555	2.112	0.03469	0.01426	0.001839	0.9849	0.008121	0.00166	0.005729	360527	354389	6138	UK Biobank
Major dietary changes in the last 5 years: No	-0.07827	0.03719	-2.105	0.03532	0.03887	0.002527	1.025	0.01081	-0.002392	0.005801	360294	138926	221368	UK Biobank
Non-cancer illness code, self-reported: diverticular disease/diverticulitis	0.1446	0.06875	2.104	0.03538	0.01329	0.001866	0.997	0.008634	-0.0085	0.006303	361141	357017	4124	UK Biobank
Job coding: non-commissioned officers or other rank of armed forces	0.2273	0.1084	2.098	0.03591	0.01601	0.00539	0.9991	0.007413	-0.01021	0.005706	89866	87863	2003	UK Biobank
Total cholesterol	-0.1242	0.05928	-2.095	0.03618	0.05485	0.02779	1.006	0.09727	0.007867	0.006825	188579	NA	NA	GLGC
Underlying (primary) cause of death: ICD10: J84.1 Other interstitial pulmonary diseases with fibrosis	0.3801	0.1821	2.087	0.03693	0.08748	0.05756	0.9946	0.00848	-0.006915	0.007581	9092	8972	120	UK Biobank
Job SOC coding: Higher education teaching professionals	0.2095	0.1006	2.083	0.03724	0.02444	0.005854	0.9934	0.007289	0.003926	0.005555	91149	88049	3100	UK Biobank
Ever had known person concerned about, or recommend reduction of, alcohol consumption: Yes, during the last year	0.1687	0.08102	2.082	0.03735	0.01944	0.004451	1	0.007526	-0.00378	0.005235	117880	112956	4924	UK Biobank
Loose teeth	0.1379	0.06632	2.079	0.03761	0.07747	0.008355	1.039	0.007825	-0.01281	0.005783	461031	442052	18979	UK Biobank
Stomach/abdominal pain for 3+ months	0.418	0.2014	2.076	0.03793	0.02702	0.01619	1.014	0.007247	-0.00652	0.005145	29747	13167	16580	UK Biobank
Food weight	0.1529	0.0741	2.063	0.03913	0.06206	0.01063	1.007	0.007502	-0.001408	0.005509	51453	NA	NA	UK Biobank
Treatment/medication code: Free-text entry, unable to be coded	0.2961	0.144	2.057	0.03972	0.0029	0.001532	1.004	0.006772	0.0065	0.006053	361141	348892	12249	UK Biobank
Sensitivity / hurt feelings	0.08103	0.03948	2.052	0.04013	0.06217	0.003322	1.022	0.01124	-0.0005925	0.006741	350821	156066	194755	UK Biobank
Bring up phlegm/sputum/mucus on most days	0.1903	0.09277	2.051	0.04025	0.02634	0.00549	1.014	0.008015	0.00772	0.005852	91787	83979	7808	UK Biobank
Irritability	0.07821	0.03813	2.051	0.04026	0.06801	0.004226	1.002	0.01318	0.004904	0.007243	345231	248369	96862	UK Biobank
Diagnoses - main ICD10: J33 Nasal polyp	0.2037	0.09967	2.044	0.04096	0.006342	0.001601	1.008	0.008393	0.003283	0.00623	361194	358987	2207	UK Biobank
Manifestations of mania or irritability: I needed less sleep than usual	0.182	0.08941	2.036	0.04177	0.01968	0.004836	0.9968	0.008462	0.001122	0.005533	114422	110645	3777	UK Biobank
Illnesses of father: Parkinson's disease	-0.2143	0.1054	-2.033	0.04205	0.00405	0.001546	0.9897	0.00697	0.01231	0.005066	312104	304061	8043	UK Biobank
Treatment/medication code: lansoprazole	0.1297	0.06399	2.027	0.04271	0.01241	0.001669	1.011	0.008663	-0.008314	0.005501	361141	348309	12832	UK Biobank
Illnesses of mother: Bowel cancer	-0.1966	0.09705	-2.026	0.04278	0.005435	0.001585	0.9998	0.007037	0.005781	0.005874	330592	313328	17264	UK Biobank
Job SOC coding: Labourers in building and woodworking trades	-0.3509	0.1735	-2.022	0.04313	0.008868	0.005067	0.9856	0.007198	0.0129	0.006102	91149	90609	540	UK Biobank
Eye problems/disorders: Cataract	0.1715	0.08485	2.021	0.0433	0.02005	0.004232	1.006	0.006723	-0.002823	0.005581	117890	106696	11194	UK Biobank
Treatment/medication code: serevent 25mcg inhaler	0.2576	0.1276	2.019	0.04345	0.003323	0.001369	1.009	0.007029	0.0146	0.005771	361141	360145	996	UK Biobank
Diagnoses - main ICD10: K30 Dyspepsia	0.2545	0.1262	2.017	0.04371	0.003811	0.001482	1.002	0.007374	-0.004365	0.005254	361194	353608	7586	UK Biobank
Ever worried more than most people would in similar situation	0.1239	0.06148	2.015	0.04394	0.06266	0.006507	1.003	0.007762	-0.0001987	0.006261	98990	73367	25623	UK Biobank
3mm cylindrical power (left)	-0.1256	0.06249	-2.009	0.04449	0.06849	0.0075	1.012	0.007476	0.003922	0.005763	75398	NA	NA	UK Biobank
Weight change during worst episode of depression: Gained weight	0.1529	0.07642	2.001	0.04535	0.05674	0.01031	1.005	0.007769	-0.004516	0.005624	56571	46863	9708	UK Biobank
Protein	0.2423	0.1212	2	0.04548	0.02446	0.009829	1.008	0.00667	-0.004811	0.005429	51453	NA	NA	UK Biobank
Job SOC coding: NCOs and other ranks	0.2128	0.1064	2	0.04553	0.01608	0.00545	0.9992	0.00753	-0.009679	0.005656	91149	89091	2058	UK Biobank
Illnesses of father: Chronic bronchitis/emphysema	0.1274	0.06385	1.995	0.04603	0.01401	0.001891	1.009	0.007966	0.007219	0.006406	314680	278554	36126	UK Biobank
Shortness of breath walking on level ground	0.1139	0.05717	1.993	0.04628	0.05075	0.004986	1.009	0.007438	0.004706	0.005967	118006	105588	12418	UK Biobank
Treatment/medication code: atenolol	-0.1213	0.06086	-1.993	0.04631	0.01606	0.001918	1.025	0.008604	7.768e-05	0.006103	361141	347190	13951	UK Biobank
Transport type for commuting to job workplace: Walk	0.1564	0.0789	1.983	0.04739	0.01608	0.002899	1.002	0.00735	-0.003964	0.005775	190832	160545	30287	UK Biobank
Non-cancer illness code, self-reported: osteoporosis	0.1298	0.06557	1.979	0.04779	0.01349	0.001834	1.006	0.008048	-0.0008465	0.005635	361141	355405	5736	UK Biobank
3mm cylindrical power angle (left)	0.1203	0.06093	1.975	0.04826	0.08529	0.00884	1.001	0.007603	-0.008329	0.006016	75389	NA	NA	UK Biobank
Retinal detachment with retinal break	-0.2769	0.1403	-1.974	0.0484	0.003117	0.001328	1.009	0.007034	0.01644	0.005413	361194	359996	1198	UK Biobank
Particulate matter air pollution (pm2.5) absorbance; 2010	-0.1551	0.07937	-1.954	0.0507	0.01019	0.001687	1.035	0.006909	0.004042	0.005786	329886	NA	NA	UK Biobank
Disorders of lens	0.1191	0.06098	1.953	0.05078	0.01519	0.00191	1.011	0.00833	0.000507	0.005873	361194	344118	17076	UK Biobank
Illnesses of father: Severe depression	0.1708	0.08744	1.953	0.05081	0.00708	0.001594	1.005	0.007129	-0.0009158	0.005502	312437	300516	11921	UK Biobank
Non-cancer illness code, self-reported: sarcoidosis	0.2072	0.1064	1.947	0.0515	0.004198	0.001325	0.9976	0.007436	-0.01156	0.005456	361141	360436	705	UK Biobank
Mental health problems ever diagnosed by a professional: Social anxiety or social phobia	-0.2178	0.1121	-1.943	0.05203	0.01106	0.004183	0.9994	0.007642	0.007968	0.005528	117716	116242	1474	UK Biobank
Iron deficiency anaemia	0.2085	0.1073	1.943	0.05203	0.004458	0.001449	0.9956	0.006977	0.0004413	0.00546	361194	357408	3786	UK Biobank
Diagnoses - main ICD10: D50 Iron deficiency anaemia	0.2085	0.1073	1.943	0.05203	0.004458	0.001449	0.9956	0.006977	0.0004413	0.00546	361194	357972	3222	UK Biobank
Diagnoses - main ICD10: E87 Other disorders of fluid, electrolyte and acid-base balance	0.272	0.1408	1.932	0.05335	0.002685	0.001293	0.9809	0.006636	0.001529	0.005402	361194	360630	564	UK Biobank
Diagnoses - main ICD10: K85 Acute pancreatitis	0.2572	0.1337	1.924	0.05434	0.002888	0.001364	0.9994	0.006887	-0.009943	0.005219	361194	359902	1292	UK Biobank
Ever felt worried, tense, or anxious for most of a month or longer	0.1096	0.05704	1.922	0.05462	0.06186	0.005294	0.9838	0.007677	-0.0001663	0.005486	110315	80964	29351	UK Biobank
Non-cancer illness code, self-reported: head injury	-0.2371	0.1236	-1.919	0.05502	0.003367	0.001465	0.9897	0.007791	0.01405	0.005537	361141	359911	1230	UK Biobank
Illness, injury, bereavement, stress in last 2 years: Death of a close relative	0.1437	0.07496	1.917	0.05522	0.006761	0.001537	1.002	0.006944	-0.003611	0.004899	358836	283531	75305	UK Biobank
Depression	0.1821	0.09499	1.917	0.05527	0.005012	0.001328	0.9939	0.007133	-0.003348	0.005794	361194	360049	1145	UK Biobank
Illnesses of siblings: None of the above (group 2)	-0.1457	0.07607	-1.916	0.05539	0.009751	0.001986	0.9974	0.00837	0.001486	0.00518	284896	44840	240056	UK Biobank
Forced expiratory volume in 1-second (FEV1), Best measure	-0.05526	0.02888	-1.914	0.05566	0.208	0.009056	1.1	0.01704	-0.02234	0.007685	272338	NA	NA	UK Biobank
Had major operations	0.1363	0.0715	1.907	0.05652	0.02561	0.003645	1.013	0.007324	0.003595	0.006106	165737	59231	106506	UK Biobank
Treatment/medication code: ezetimibe	-0.1937	0.1016	-1.906	0.05667	0.004851	0.001549	1.009	0.008206	0.01112	0.00563	361141	359009	2132	UK Biobank
Spinal stenosis	0.1584	0.08334	1.901	0.05736	0.007056	0.001432	0.9909	0.006756	-0.002662	0.005283	361194	359284	1910	UK Biobank
Illnesses of father: High blood pressure	0.1139	0.05992	1.9	0.05741	0.01613	0.001764	1.022	0.008127	0.001117	0.005251	315021	243885	71136	UK Biobank
Age started hormone-replacement therapy (HRT)	-0.1146	0.06073	-1.887	0.05915	0.0838	0.009825	0.9926	0.008536	0.005719	0.005963	68299	NA	NA	UK Biobank
Ulcer of oesophagus	0.164	0.0871	1.883	0.05974	0.005041	0.001686	1.008	0.007974	-0.001175	0.005543	361194	358096	3098	UK Biobank
Diagnoses - main ICD10: K57 Diverticular disease of intestine	0.09924	0.05289	1.876	0.06059	0.02288	0.002138	1.008	0.008868	-0.007303	0.006448	361194	348532	12662	UK Biobank
Diagnoses - main ICD10: M48 Other spondylopathies	0.1552	0.08288	1.872	0.06117	0.006438	0.001485	0.9929	0.006942	-0.0007907	0.00531	361194	359304	1890	UK Biobank
Pain type(s) experienced in last month: Headache	0.06859	0.03673	1.867	0.06187	0.04484	0.002907	1.005	0.01107	0.007516	0.006707	360391	288719	71672	UK Biobank
Diagnoses - main ICD10: R55 Syncope and collapse	0.156	0.08381	1.861	0.06268	0.006311	0.001417	1.003	0.007118	-0.006447	0.005614	361194	356011	5183	UK Biobank
Diagnoses - main ICD10: R10 Abdominal and pelvic pain	0.1151	0.06195	1.858	0.06322	0.01504	0.001779	0.9975	0.00857	-0.002599	0.006049	361194	340954	20240	UK Biobank
Low-density lipoprotein (LDL)	-0.2329	0.1254	-1.857	0.06334	0.02776	0.03501	1.079	0.1375	0.01763	0.006911	188578	NA	NA	GLGC
Cancer code, self-reported: basal cell carcinoma	-0.147	0.0793	-1.853	0.06382	0.01052	0.00188	0.997	0.008251	0.009586	0.005835	361141	357700	3441	UK Biobank
Hand grip strength (right)	-0.06342	0.03436	-1.846	0.06492	0.1205	0.004922	1.064	0.01423	0.006798	0.007286	359729	NA	NA	UK Biobank
Disorders of gallbladder, biliary tract and pancreas	0.1171	0.06353	1.843	0.06532	0.01629	0.001899	1.029	0.01192	-0.00784	0.00631	361194	347272	13922	UK Biobank
Vegetable consumers	0.2472	0.1357	1.821	0.06861	0.01939	0.0101	1.004	0.007227	-0.003252	0.005639	51427	9068	42359	UK Biobank
Frequency of solarium/sunlamp use	-0.09003	0.04966	-1.813	0.06986	0.02122	0.002044	1.002	0.00879	0.01055	0.006139	340643	NA	NA	UK Biobank
Been in serious accident believed to be life-threatening	0.1967	0.1087	1.809	0.0704	0.01572	0.004369	1.015	0.007122	-0.004103	0.00615	117922	106597	11325	UK Biobank
Folate	0.1733	0.0964	1.798	0.07218	0.0421	0.009664	0.9995	0.00722	-0.005278	0.005674	51453	NA	NA	UK Biobank
Other eye problems	0.1313	0.07315	1.795	0.07263	0.0084	0.00163	1.03	0.00784	0.01407	0.005757	360134	308414	51720	UK Biobank
Eye problems/disorders: None of the above	-0.1273	0.07117	-1.789	0.07362	0.02679	0.005062	1.016	0.007256	-0.002773	0.005462	117890	25949	91941	UK Biobank
Bread type: Wholemeal or wholegrain	0.06749	0.03775	1.788	0.07384	0.04815	0.002762	1.038	0.01041	-0.003512	0.006311	348424	147411	201013	UK Biobank
Diagnoses - main ICD10: R19 Other symptoms and signs involving the digestive system and abdomen	0.2726	0.1525	1.787	0.07386	0.002725	0.001404	1.011	0.00732	-0.00412	0.005396	361194	352398	8796	UK Biobank
Diagnoses - main ICD10: K21 Gastro-oesophageal reflux disease	0.1324	0.07465	1.774	0.07613	0.009866	0.001529	1.001	0.007495	-0.005914	0.005308	361194	350451	10743	UK Biobank
Treatment/medication code: movicol oral powder	0.2849	0.161	1.77	0.07674	0.002097	0.001211	0.9976	0.007184	0.002792	0.00526	361141	360010	1131	UK Biobank
Illness, injury, bereavement, stress in last 2 years: Serious illness, injury or assault of a close relative	0.1324	0.07483	1.77	0.07677	0.0108	0.001806	1.011	0.008132	-0.001633	0.005651	358836	317377	41459	UK Biobank
#Polyarthropathies	0.1902	0.1076	1.767	0.07724	0.005186	0.001532	0.9879	0.007145	-0.004001	0.00508	361194	357919	3275	UK Biobank
Other ILD-related CVD-co-morbidities	0.1764	0.09985	1.766	0.07734	0.004083	0.001609	1.009	0.008829	-0.004128	0.005167	361194	358687	2507	UK Biobank
Non-accidental death in close genetic family	0.1821	0.1034	1.76	0.07833	0.01531	0.004518	1.002	0.007622	-0.005881	0.005706	113705	82661	31044	UK Biobank
Vitamin and mineral supplements: Multivitamins +/- minerals	0.08164	0.04672	1.748	0.08055	0.02547	0.001903	1.004	0.008819	0.005349	0.005782	359245	281773	77472	UK Biobank
Hearing aid user	0.1689	0.09691	1.742	0.08144	0.01812	0.003315	0.9989	0.00994	0.002872	0.007149	219358	208416	10942	UK Biobank
Current employment status: Unemployed	-0.1623	0.09344	-1.737	0.08232	0.005662	0.001469	0.9967	0.007421	0.01083	0.005432	359931	354237	5694	UK Biobank
Diagnoses - main ICD10: K43 Ventral hernia	0.1724	0.09936	1.735	0.08271	0.00468	0.001542	1.002	0.007184	-0.005032	0.00525	361194	358945	2249	UK Biobank
Qualifications: Other professional qualifications eg: nursing, teaching	0.06786	0.03914	1.734	0.08292	0.04353	0.002265	1.029	0.009821	0.01035	0.006116	357549	253308	104241	UK Biobank
Treatment/medication code: sodium cromoglicate	0.2657	0.1534	1.733	0.08312	0.002355	0.001405	0.9903	0.008	0.01177	0.006232	361141	360831	310	UK Biobank
is_female, based on inferred genetic sex	0.1224	0.07073	1.73	0.08356	0.01103	0.001681	1.016	0.008304	-0.007876	0.00589	361194	167020	194174	UK Biobank
Vitamin B12	0.345	0.1994	1.73	0.08361	0.01245	0.009071	0.9986	0.006338	-0.01013	0.005388	51453	NA	NA	UK Biobank
Why reduced smoking: Illness or ill health	0.205	0.1188	1.725	0.0846	0.1073	0.04387	0.9967	0.006863	-0.002691	0.005027	11443	9839	1604	UK Biobank
Energy	0.1506	0.08757	1.72	0.0854	0.04043	0.01012	1.006	0.006726	-0.001504	0.005243	51453	NA	NA	UK Biobank
Non-cancer illness code, self-reported: back problem	0.1982	0.1154	1.717	0.08601	0.004552	0.001429	1.003	0.007387	-0.002303	0.005401	361141	354802	6339	UK Biobank
Mother's age at death	-0.1298	0.07563	-1.716	0.08618	0.01335	0.002769	1.02	0.008048	0.007805	0.005244	213636	NA	NA	UK Biobank
Certain infectious and parasitic diseases	0.4137	0.2438	1.697	0.08968	0.00162	0.001577	1.01	0.008139	-0.00539	0.005133	361194	353664	7530	UK Biobank
Handedness (chirality/laterality): Use both right and left hands equally	0.2124	0.1254	1.694	0.09019	0.003257	0.001531	1.011	0.006856	0.003984	0.005959	360913	354827	6086	UK Biobank
6mm cylindrical power angle (left)	0.1085	0.0641	1.692	0.09057	0.07027	0.009299	1.004	0.007705	-0.007372	0.005496	65529	NA	NA	UK Biobank
Potassium	0.1565	0.09257	1.691	0.0909	0.03771	0.01074	1.007	0.007244	-0.001374	0.005374	51453	NA	NA	UK Biobank
Non-cancer illness code, self-reported: unclassifiable	0.3559	0.2105	1.691	0.0909	0.001487	0.001277	1.003	0.006537	0.01126	0.005062	361141	346544	14597	UK Biobank
Diseases of the blood and blood-forming organs and certain disorders involving the immune mechanism	0.1785	0.1056	1.69	0.09097	0.005055	0.001439	0.9986	0.006971	0.002558	0.005329	361194	351099	10095	UK Biobank
Medication for cholesterol, blood pressure, diabetes, or take exogenous hormones: Cholesterol lowering medication	-0.08576	0.05074	-1.69	0.09101	0.04923	0.007611	1.04	0.02628	0.002654	0.006217	193148	168901	24247	UK Biobank
Alcohol usually taken with meals	0.06445	0.03822	1.686	0.09173	0.09967	0.00501	1.041	0.009701	0.001976	0.006365	184716	59552	125164	UK Biobank
Non-cancer illness code, self-reported: urinary frequency / incontinence	0.1793	0.1067	1.681	0.09279	0.003421	0.00141	0.9894	0.007477	-0.004795	0.005446	361141	359889	1252	UK Biobank
Glomerulonephritis	0.2576	0.1535	1.678	0.09328	0.002555	0.001344	0.9913	0.006895	-0.003187	0.005708	361194	360565	629	UK Biobank
Non-cancer illness code, self-reported: anxiety/panic attacks	0.1465	0.08763	1.672	0.09457	0.004909	0.001301	1.005	0.006816	-7.507e-05	0.005399	361141	356180	4961	UK Biobank
Hemoglobin concentration	-0.06675	0.03994	-1.671	0.09466	0.1232	0.01145	1.031	0.02609	0.004883	0.006362	173487	NA	NA	UK Biobank and INTERVAL
Workplace very cold: Sometimes	0.1145	0.06852	1.671	0.09478	0.04762	0.006294	1.007	0.007518	-0.008826	0.006697	90500	47677	42823	UK Biobank
Illnesses of siblings: Chronic bronchitis/emphysema	0.1623	0.09741	1.666	0.09576	0.005676	0.001923	1.005	0.008098	0.01064	0.005129	279496	271563	7933	UK Biobank
Diagnoses - main ICD10: T81 Complications of procedures, not elsewhere classified	0.1874	0.1125	1.665	0.09583	0.004011	0.001372	1.003	0.006962	-0.003366	0.005447	361194	355644	5550	UK Biobank
Treatment/medication code: allopurinol	0.09947	0.05978	1.664	0.09614	0.02113	0.006117	0.9908	0.01921	-0.004555	0.006575	361141	357033	4108	UK Biobank
Activities undertaken to treat anxiety: Talking therapies, such as psychotherapy, counselling, group therapy or CBT	0.1129	0.06801	1.659	0.09703	0.04459	0.005482	0.9881	0.007508	0.006502	0.005912	98990	86132	12858	UK Biobank
Fibromyalgia related co-morbidities	0.1694	0.1022	1.659	0.09721	0.00405	0.001329	1.004	0.00692	0.00147	0.00567	361194	358889	2305	UK Biobank
Hand grip strength (left)	-0.05721	0.03457	-1.655	0.09792	0.1204	0.004865	1.055	0.01458	0.0007397	0.006789	359704	NA	NA	UK Biobank
BMI	0.05141	0.03118	1.649	0.0992	0.0955	0.005385	0.651	0.009855	-0.009492	0.0058	339224	NA	NA	GIANT Consortium
Monocyte Chemotactic Protein-1 (MCP1)	0.2124	0.129	1.647	0.0996	0.1524	0.07528	0.9913	0.008482	-0.007931	0.005829	8293	NA	NA	Young Finns Study (YFS)
Treatment/medication code: rhinocort 50micrograms nasal spray	0.1719	0.1047	1.642	0.1005	0.004492	0.001368	0.9771	0.008345	0.001284	0.006358	361141	360981	160	UK Biobank
Astigmatism angle (right)	0.1567	0.09541	1.642	0.1006	0.0255	0.006755	1.011	0.006537	-0.004265	0.005432	77983	NA	NA	UK Biobank
Major dietary changes in the last 5 years: Yes, because of illness	0.06872	0.04186	1.641	0.1007	0.02751	0.001913	1.016	0.00847	0.004924	0.006017	360294	322243	38051	UK Biobank
Treatment/medication code: beconase 50micrograms nasal spray	0.3404	0.2074	1.641	0.1008	0.001902	0.001365	1.011	0.007756	0.01826	0.005559	361141	358726	2415	UK Biobank
Bread type: White	-0.06433	0.03921	-1.641	0.1009	0.05836	0.002881	1.032	0.011	0.001811	0.006834	348424	256972	91452	UK Biobank
Nitrogen dioxide air pollution; 2005	-0.08607	0.05251	-1.639	0.1012	0.02161	0.002005	1.058	0.008375	0.004077	0.00573	356078	NA	NA	UK Biobank
Any mental disorder	0.1343	0.08198	1.638	0.1013	0.00658	0.001442	0.9986	0.007493	-0.001195	0.005497	361194	356890	4304	UK Biobank
Job coding: higher education teaching professional, university lecturer/professor (including college/university head/vice chancellor)	0.1645	0.1007	1.633	0.1025	0.02334	0.005977	0.9867	0.006904	0.005732	0.005443	89866	87235	2631	UK Biobank
Other disorders affecting eyelid function	0.2019	0.1236	1.633	0.1025	0.003478	0.00164	0.9863	0.01013	-0.006678	0.006698	361194	361060	134	UK Biobank
Diagnoses - main ICD10: Z47 Other orthopaedic follow-up care	0.1587	0.09759	1.626	0.104	0.004259	0.001479	0.9969	0.007625	-0.001899	0.005114	361194	358420	2774	UK Biobank
Workplace very hot: Rarely/never	-0.1307	0.08063	-1.621	0.105	0.03195	0.006624	1.009	0.007039	0.01871	0.005839	90644	21939	68705	UK Biobank
Hair/balding pattern: Pattern 4	-0.06489	0.04004	-1.621	0.1051	0.1712	0.02109	1.105	0.02866	-0.0002109	0.007051	165649	135424	30225	UK Biobank
Number of incorrect matches in round	0.05665	0.03499	1.619	0.1054	0.05881	0.002781	1.016	0.01069	-0.009847	0.006145	360686	NA	NA	UK Biobank
Iron	0.1497	0.09254	1.617	0.1058	0.03868	0.009813	1.01	0.007119	-0.002931	0.005375	51453	NA	NA	UK Biobank
Unstable angina pectoris	0.1117	0.06913	1.616	0.106	0.009684	0.001727	0.9942	0.008121	-0.01131	0.005154	361194	357755	3439	UK Biobank
Mouth/teeth dental problems: Bleeding gums	0.08286	0.05131	1.615	0.1064	0.02232	0.001889	1.014	0.00863	-0.001171	0.006257	359841	313147	46694	UK Biobank
Treatment/medication code: pioglitazone	0.1446	0.08958	1.614	0.1065	0.005477	0.001462	0.9839	0.00747	-0.01334	0.005482	361141	360397	744	UK Biobank
Non-cancer illness code, self-reported: transient ischaemic attack (tia)	0.2511	0.1557	1.613	0.1067	0.1541	0.09234	0.9922	0.007321	-0.004235	0.00526	361141	359772	1369	UK Biobank
Skin colour	0.07911	0.04913	1.61	0.1073	0.1025	0.03443	1.065	0.08685	0.003303	0.007707	356530	NA	NA	UK Biobank
Toothache	0.1207	0.07499	1.61	0.1074	0.04703	0.007191	1.026	0.007194	0.005858	0.005227	461031	442072	18959	UK Biobank
Attendance/disability/mobility allowance: Blue badge	0.08177	0.0508	1.61	0.1075	0.02319	0.001836	1.013	0.008608	0.0002327	0.005394	358597	345864	12733	UK Biobank
Hematocrit	-0.06516	0.04051	-1.608	0.1077	0.1247	0.01219	1.032	0.02629	0.004389	0.006314	173486	NA	NA	UK Biobank and INTERVAL
P duration	0.2004	0.1249	1.605	0.1085	0.1052	0.04915	0.992	0.007801	-0.007417	0.005791	10785	NA	NA	UK Biobank
Medication for pain relief, constipation, heartburn: Ibuprofen (e.g. Nurofen)	0.07566	0.04718	1.604	0.1088	0.02069	0.001671	1.003	0.007404	0.0009379	0.005186	357084	304035	53049	UK Biobank
6mm strong meridian (right)	0.06088	0.03801	1.602	0.1092	0.3384	0.02933	1.101	0.02694	-0.0182	0.006615	66256	NA	NA	UK Biobank
Blood clot, DVT, bronchitis, emphysema, asthma, rhinitis, eczema, allergy diagnosed by doctor: Blood clot in the lung	0.1384	0.0876	1.58	0.114	0.00573	0.00156	1.009	0.007682	-0.01181	0.005537	360527	357543	2984	UK Biobank
Job coding: restaurant or catering manager, restaurateur; canteen manager; takeaway food shop manager	-0.2744	0.1742	-1.575	0.1152	0.009002	0.005841	0.988	0.007399	0.005941	0.005607	89866	89306	560	UK Biobank
Malignant melanoma of skin	-0.1877	0.1192	-1.575	0.1153	0.002959	0.001713	1.018	0.008041	0.002173	0.005269	361194	358660	2534	UK Biobank
Malignant melanoma of skin	-0.1877	0.1192	-1.575	0.1153	0.002959	0.001713	1.018	0.008041	0.002173	0.005269	361194	358660	2534	UK Biobank
Ever had hysterectomy (womb removed)	0.09906	0.06294	1.574	0.1155	0.02293	0.003486	1.007	0.008248	-0.004274	0.005473	171413	157440	13973	UK Biobank
Diseases of the circulatory system	0.07264	0.04617	1.574	0.1156	0.02656	0.002017	1.03	0.009438	-0.002853	0.005735	361194	300690	60504	UK Biobank
Diagnoses - main ICD10: N43 Hydrocele and spermatocele	-0.1508	0.09612	-1.569	0.1167	0.004864	0.001566	1.01	0.008316	0.01278	0.005325	361194	360310	884	UK Biobank
Job coding: civil service senior manager outside the senior civil service (former grades 6 and 7)	0.2237	0.1427	1.567	0.1171	0.01044	0.00563	1.001	0.007646	-0.004251	0.005952	89866	88542	1324	UK Biobank
Endometriosis, IBD co-morbidity	0.1303	0.08333	1.564	0.1178	0.005474	0.0015	0.9886	0.007706	-0.003641	0.005671	361194	359678	1516	UK Biobank
Diagnoses - main ICD10: N80 Endometriosis	0.1303	0.08333	1.564	0.1178	0.005474	0.0015	0.9886	0.007706	-0.003641	0.005671	361194	359698	1496	UK Biobank
Other arthrosis	0.1596	0.1022	1.562	0.1183	0.005638	0.001572	1.017	0.007236	-0.0008141	0.006231	361194	356026	5168	UK Biobank
Job SOC coding: Conference and exhibition managers	0.1771	0.1138	1.556	0.1197	0.0184	0.005831	0.9856	0.009076	-0.01477	0.007249	91149	91045	104	UK Biobank
6mm cylindrical power (right)	-0.1463	0.09405	-1.555	0.1199	0.02702	0.00753	1.023	0.006794	0.007404	0.005876	66256	NA	NA	UK Biobank
Fat	0.1485	0.09565	1.552	0.1206	0.03318	0.0101	1.004	0.006849	-0.003762	0.005048	51453	NA	NA	UK Biobank
Nitrogen dioxide air pollution; 2006	-0.08239	0.0531	-1.552	0.1207	0.02048	0.001994	1.052	0.008177	0.001671	0.005671	356078	NA	NA	UK Biobank
Milk type used: Skimmed	0.07172	0.04642	1.545	0.1224	0.01953	0.001803	1.01	0.008021	0.001629	0.005631	360806	286719	74087	UK Biobank
Mouth/teeth dental problems: Loose teeth	0.1033	0.06712	1.538	0.1239	0.01365	0.001628	1.012	0.007302	-0.01095	0.005925	359841	345477	14364	UK Biobank
Workplace very noisy: Sometimes	0.1523	0.09897	1.538	0.1239	0.02028	0.005627	1.017	0.007239	-0.005019	0.005771	90777	39088	51689	UK Biobank
Why stopped smoking: Illness or ill health	0.1671	0.1087	1.537	0.1242	0.0178	0.005993	1.004	0.008037	0.002294	0.006138	88516	77879	10637	UK Biobank
Magnesium	0.1287	0.08401	1.532	0.1256	0.0419	0.01081	1.012	0.007426	-0.001065	0.005048	51453	NA	NA	UK Biobank
Hallux valgus (acquired)	0.1053	0.06911	1.523	0.1277	0.01157	0.001562	1.01	0.008157	-0.003517	0.005594	361194	355824	5370	UK Biobank
Mental health problems ever diagnosed by a professional: Anxiety, nerves or generalized anxiety disorder	0.1063	0.06981	1.523	0.1278	0.03608	0.004745	0.9975	0.008292	0.007589	0.005395	117751	101021	16730	UK Biobank
Leisure/social activities: Pub or social club	-0.06265	0.04116	-1.522	0.128	0.03612	0.002167	1.007	0.008676	-0.003268	0.005716	360063	261564	98499	UK Biobank
6mm strong meridian (left)	0.0603	0.03973	1.518	0.1291	0.3414	0.03009	1.099	0.02626	-0.01652	0.006518	65551	NA	NA	UK Biobank
Attendance/disability/mobility allowance: None of the above	-0.07024	0.04633	-1.516	0.1295	0.03259	0.00216	1.016	0.009615	-0.002623	0.005894	358597	20718	337879	UK Biobank
ECG, heart rate	-0.1006	0.06639	-1.516	0.1296	0.08582	0.01372	1.023	0.008608	0.004972	0.005722	53777	NA	NA	UK Biobank
Mean corpuscular volume	-0.0486	0.03207	-1.515	0.1297	0.2298	0.02813	1.047	0.04033	0.005947	0.007172	173499	NA	NA	UK Biobank and INTERVAL
Other specific joint derangements/joint disorders	0.153	0.101	1.514	0.1299	0.004453	0.001435	1.012	0.007653	0.003604	0.005862	361194	353251	7943	UK Biobank
Worked with paints, thinners or glues: Often	0.1735	0.1146	1.514	0.13	0.01404	0.005919	1.008	0.007442	-0.007094	0.005195	88718	84995	3723	UK Biobank
Diagnoses - main ICD10: K63 Other diseases of intestine	0.2025	0.1339	1.512	0.1304	0.003117	0.001361	1.02	0.007755	-0.002881	0.005423	361194	353153	8041	UK Biobank
Non-cancer illness code, self-reported: gout	0.09088	0.0601	1.512	0.1305	0.02431	0.007377	0.9923	0.02284	-0.007729	0.006604	361141	355967	5174	UK Biobank
Malignant neoplasm of prostate	-0.1114	0.07382	-1.509	0.1312	0.01128	0.002026	1.034	0.01237	0.005714	0.00603	361194	354873	6321	UK Biobank
Malignant neoplasm of prostate	-0.1114	0.07382	-1.509	0.1312	0.01128	0.002026	1.034	0.01237	0.005714	0.00603	361194	354873	6321	UK Biobank
Treatment/medication code: ibuprofen	0.07354	0.04872	1.509	0.1312	0.01628	0.001651	1.003	0.007387	0.0007193	0.005115	361141	316136	45005	UK Biobank
Diagnoses - main ICD10: R04 Haemorrhage from respiratory passages	0.1932	0.1285	1.503	0.1328	0.003205	0.001544	1.006	0.007386	-0.005971	0.006215	361194	358358	2836	UK Biobank
Ever addicted to any substance or behaviour	0.1343	0.08945	1.501	0.1333	0.02048	0.005242	0.996	0.008125	-0.002571	0.005938	116746	109723	7023	UK Biobank
Medication for cholesterol, blood pressure, diabetes, or take exogenous hormones: Insulin	-0.1651	0.11	-1.5	0.1336	0.00796	0.002621	0.9999	0.007041	0.003243	0.006007	193148	191672	1476	UK Biobank
Other dorsopathies, not elsewhere classified	0.2043	0.1366	1.495	0.1349	0.002146	0.00139	0.9865	0.008367	-0.00845	0.005751	361194	360834	360	UK Biobank
Diagnoses - main ICD10: M53 Other dorsopathies, not elsewhere classified	0.2043	0.1366	1.495	0.1349	0.002146	0.00139	0.9865	0.008367	-0.00845	0.005751	361194	360852	342	UK Biobank
Coffee type: Ground coffee (include espresso, filter etc)	0.05883	0.03941	1.493	0.1355	0.06247	0.003292	1.046	0.01039	0.01048	0.006854	283449	218487	64962	UK Biobank
logMAR, final (left)	-0.129	0.08654	-1.49	0.1361	0.02773	0.0067	1.001	0.00844	0.007836	0.005034	79239	NA	NA	UK Biobank
Non-cancer illness code, self-reported: osteoarthritis	0.08522	0.05724	1.489	0.1366	0.01844	0.001701	1.029	0.008101	0.00976	0.00587	361141	331095	30046	UK Biobank
Worry too long after embarrassment	0.05376	0.03615	1.487	0.137	0.06503	0.003305	1.023	0.01114	0.002134	0.006178	346527	181217	165310	UK Biobank
Diagnoses - main ICD10: H40 Glaucoma	0.2138	0.1442	1.483	0.138	0.002298	0.001328	1.009	0.007065	-0.007171	0.00568	361194	359479	1715	UK Biobank
Spondylopathies (FG)	0.2073	0.1407	1.473	0.1407	0.002562	0.001453	0.9939	0.007591	-0.007316	0.005921	361194	360858	336	UK Biobank
Diagnoses - main ICD10: T86 Failure and rejection of transplanted organs and tissues	0.1523	0.1036	1.47	0.1414	0.00479	0.001439	0.9832	0.008213	0.000177	0.006374	361194	361031	163	UK Biobank
Job coding: assembler, machine operator, foreman	0.3481	0.2367	1.47	0.1415	0.006418	0.005208	0.9921	0.007682	-0.01375	0.006265	89866	89650	216	UK Biobank
Heart failure	0.1433	0.09785	1.465	0.143	0.004617	0.00139	0.9997	0.007495	-0.008316	0.005885	361194	359789	1405	UK Biobank
Heart failure, not strict	0.1433	0.09785	1.465	0.143	0.004617	0.00139	0.9997	0.007495	-0.008316	0.005885	361194	359789	1405	UK Biobank
Heart failure,strict	0.1433	0.09785	1.465	0.143	0.004617	0.00139	0.9997	0.007495	-0.008316	0.005885	361194	359789	1405	UK Biobank
Current employment status: In paid employment or self-employed	-0.09001	0.06161	-1.461	0.144	0.0134	0.001761	1.016	0.007592	0.00272	0.005439	359931	154782	205149	UK Biobank
Diagnoses - main ICD10: I50 Heart failure	0.1547	0.106	1.459	0.1445	0.0042	0.001323	1	0.007483	-0.007972	0.006041	361194	360106	1088	UK Biobank
Hip circumference	0.03882	0.02662	1.458	0.1447	0.2108	0.009306	1.093	0.02279	-0.01476	0.007288	360521	NA	NA	UK Biobank
Leisure/social activities: Religious group	0.06139	0.0421	1.458	0.1448	0.04885	0.002715	1.024	0.01013	0.003694	0.006404	360063	307366	52697	UK Biobank
Diseases of the musculoskeletal system and connective tissue	0.05965	0.04108	1.452	0.1464	0.04234	0.002787	1.034	0.01139	0.006556	0.006345	361194	284095	77099	UK Biobank
Nitrogen dioxide air pollution; 2010	-0.08247	0.0569	-1.449	0.1472	0.01568	0.001751	1.038	0.007337	-0.002271	0.005442	356078	NA	NA	UK Biobank
Treatment/medication code: chlorphenamine	0.151	0.1044	1.447	0.148	0.003803	0.001313	0.9875	0.007434	0.005314	0.006238	361141	360924	217	UK Biobank
Job SOC coding: Public service administrative professionals	0.2159	0.1494	1.445	0.1484	0.009393	0.005473	1.003	0.007482	-0.004251	0.005951	91149	89797	1352	UK Biobank
#Other joint disorders	0.07632	0.05291	1.443	0.1491	0.01901	0.002012	1.017	0.008193	0.003873	0.006449	361194	333847	27347	UK Biobank
Illnesses of siblings: High blood pressure	0.07313	0.0507	1.442	0.1492	0.0352	0.002515	1.013	0.008987	-0.005273	0.006625	281619	223124	58495	UK Biobank
Forced expiratory volume in 1-second (FEV1)	-0.04228	0.02942	-1.437	0.1507	0.184	0.007757	1.109	0.01801	-0.01987	0.008044	329404	NA	NA	UK Biobank
Treatment/medication code: co-codamol	0.1067	0.07427	1.436	0.1509	0.0103	0.001548	1.014	0.007977	-0.008323	0.005958	361141	352757	8384	UK Biobank
Diagnoses - main ICD10: F32 Depressive episode	0.2077	0.1446	1.436	0.1509	0.002223	0.001247	1.011	0.006815	0.0002117	0.005857	361194	360418	776	UK Biobank
Non-cancer illness code, self-reported: emphysema/chronic bronchitis	0.1065	0.07427	1.434	0.1516	0.01114	0.001713	0.9859	0.008005	0.003839	0.005638	361141	356110	5031	UK Biobank
Ever been injured or injured someone else through drinking alcohol: No	0.1655	0.1155	1.433	0.1519	0.01102	0.004533	1.011	0.00839	-0.009491	0.005378	118002	5093	112909	UK Biobank
Endocrine, nutritional and metabolic diseases	0.163	0.114	1.43	0.1526	0.00377	0.00148	1.005	0.00747	-0.00451	0.005393	361194	353976	7218	UK Biobank
Treatment/medication code: flecainide	0.1912	0.134	1.427	0.1536	0.002588	0.001407	0.9941	0.007834	-0.00927	0.005608	361141	360537	604	UK Biobank
Impingement syndrome of shoulder	0.1246	0.08742	1.426	0.154	0.005576	0.001271	0.9911	0.007281	0.002496	0.006015	361194	357774	3420	UK Biobank
Current employment status: Doing unpaid or voluntary work	0.1115	0.07834	1.423	0.1547	0.007514	0.001441	1.015	0.007105	0.001417	0.005603	359931	346623	13308	UK Biobank
Size of red wine glass drunk: small (125ml)	0.2077	0.1463	1.42	0.1557	0.01943	0.01081	0.9858	0.007574	-0.008344	0.005849	51427	48349	3078	UK Biobank
Obesity	0.1353	0.09563	1.415	0.1571	0.004869	0.001438	0.9906	0.00702	-0.006877	0.006051	361194	360746	448	UK Biobank
Attendance/disability/mobility allowance: Disability living allowance	0.06702	0.04738	1.415	0.1572	0.02673	0.001743	1.008	0.008504	0.00322	0.005673	358597	342900	15697	UK Biobank
Heel Broadband ultrasound attenuation, direct entry	0.05208	0.0369	1.411	0.1582	0.2291	0.02089	1.081	0.02993	-0.0232	0.007406	206576	NA	NA	UK Biobank
Non-cancer illness code, self-reported: nasal polyps	0.1557	0.1108	1.405	0.16	0.004615	0.001501	1.009	0.007226	-0.001137	0.005974	361141	359554	1587	UK Biobank
Tinnitus: No, never	-0.08155	0.05808	-1.404	0.1602	0.05367	0.004769	1.017	0.007501	-0.004382	0.006282	117882	34267	83615	UK Biobank
Lymphocyte count	-0.06098	0.04354	-1.401	0.1613	0.1798	0.01437	0.9833	0.02178	-0.00105	0.007473	173495	NA	NA	UK Biobank and INTERVAL
Job coding: all other personal assistants and secretaries	-0.1491	0.1065	-1.4	0.1616	0.02039	0.005474	0.9861	0.007239	0.00451	0.005804	89866	84522	5344	UK Biobank
Treatment/medication code: vitamin b compound tablet	0.204	0.1458	1.399	0.1618	0.002484	0.001333	0.995	0.006594	-5.538e-05	0.005898	361141	358522	2619	UK Biobank
Father still alive	0.09402	0.06725	1.398	0.1621	0.01018	0.001539	1.001	0.007307	-0.002097	0.00573	351538	270309	81229	UK Biobank
Treatment/medication code: kapake tablet	0.1878	0.1345	1.396	0.1628	0.003708	0.0016	0.979	0.009041	-0.01037	0.007562	361141	361037	104	UK Biobank
Average 16-hour sound level of noise pollution	-0.1626	0.1166	-1.395	0.1631	0.003374	0.001338	0.9928	0.00667	0.004612	0.005458	356078	NA	NA	UK Biobank
Average daytime sound level of noise pollution	-0.1627	0.1167	-1.394	0.1632	0.003372	0.001338	0.9928	0.006671	0.004614	0.005458	356078	NA	NA	UK Biobank
Average evening sound level of noise pollution	-0.1627	0.1167	-1.394	0.1632	0.003371	0.001338	0.9928	0.00667	0.004607	0.005458	356078	NA	NA	UK Biobank
Average 24-hour sound level of noise pollution	-0.1626	0.1166	-1.394	0.1632	0.003375	0.001338	0.9928	0.006671	0.004608	0.005458	356078	NA	NA	UK Biobank
Average night-time sound level of noise pollution	-0.1626	0.1167	-1.394	0.1633	0.003372	0.001338	0.9928	0.006671	0.004613	0.005458	356078	NA	NA	UK Biobank
Non-cancer illness code, self-reported: high cholesterol	-0.06461	0.04636	-1.394	0.1634	0.03719	0.008162	1.099	0.05263	-0.000718	0.006282	361141	317184	43957	UK Biobank
Diagnoses - main ICD10: M19 Other arthrosis	0.1677	0.1204	1.393	0.1635	0.004307	0.001449	1.016	0.007561	0.002502	0.006196	361194	357029	4165	UK Biobank
Workplace very noisy: Often	0.08441	0.06061	1.393	0.1637	0.05008	0.006345	1.008	0.007217	-0.0107	0.005909	90653	73184	17469	UK Biobank
Hair/balding pattern: Pattern 2	-0.07711	0.05538	-1.392	0.1638	0.05307	0.006715	1.04	0.01541	0.007987	0.005588	165649	127605	38044	UK Biobank
NA	-0.1042	0.0752	-1.385	0.166	0.01126	0.001909	1.027	0.01207	0.005401	0.006087	361194	354399	6795	UK Biobank
malignant neoplasm of male genital organs	-0.1042	0.0752	-1.385	0.166	0.01126	0.001909	1.027	0.01207	0.005401	0.006087	361194	354399	6795	UK Biobank
Victim of physically violent crime	0.09514	0.06869	1.385	0.166	0.02726	0.004821	1.007	0.007373	0.006565	0.005512	117846	95920	21926	UK Biobank
Non-cancer illness code, self-reported: pulmonary embolism +/- dvt	0.1206	0.08743	1.38	0.1676	0.005611	0.001519	1.007	0.00776	-0.01083	0.005555	361141	358142	2999	UK Biobank
Major coronary heart disease event excluding revascularizations	0.06596	0.04786	1.378	0.1681	0.02013	0.002065	1.002	0.00923	-0.01228	0.005454	361194	351037	10157	UK Biobank
Major coronary heart disease event	0.06596	0.04786	1.378	0.1681	0.02013	0.002065	1.002	0.00923	-0.01228	0.005454	361194	351037	10157	UK Biobank
Did your sleep change?	0.1473	0.1076	1.369	0.1709	0.02032	0.009507	1.003	0.007699	-0.007762	0.00473	57086	11546	45540	UK Biobank
Fed-up feelings	0.04647	0.03411	1.362	0.1731	0.07144	0.003341	1.026	0.01074	-0.008225	0.00673	353764	210432	143332	UK Biobank
Major dietary changes in the last 5 years: Yes, because of other reasons	0.06934	0.0509	1.362	0.1731	0.01896	0.001801	1.011	0.008018	-0.001193	0.005928	360294	259419	100875	UK Biobank
Blood clot, DVT, bronchitis, emphysema, asthma, rhinitis, eczema, allergy diagnosed by doctor: Blood clot in the leg (DVT)	0.1136	0.08338	1.362	0.1731	0.009531	0.001714	1.018	0.01196	-0.006417	0.00612	360527	353141	7386	UK Biobank
Treatment/medication code: flixonase 50micrograms aqueous nasal spray	0.1755	0.1292	1.358	0.1744	0.00289	0.001439	0.9973	0.007881	0.01794	0.005798	361141	359717	1424	UK Biobank
Non-cancer illness code, self-reported: multiple sclerosis	0.1907	0.1405	1.357	0.1747	0.002614	0.001223	1.015	0.006849	-0.001828	0.006631	361141	359815	1326	UK Biobank
Time to answer	0.1038	0.07659	1.355	0.1754	0.02432	0.005137	1.068	0.008434	0.000865	0.00545	119729	NA	NA	UK Biobank
Treatment/medication code: candesartan cilexetil	0.1128	0.08333	1.354	0.1757	0.007911	0.001427	0.9918	0.007193	-0.01058	0.005863	361141	357266	3875	UK Biobank
Diagnoses - main ICD10: R69 Unknown and unspecified causes of morbidity	0.1588	0.1173	1.353	0.1761	0.00384	0.001444	0.998	0.007441	-0.005825	0.00563	361194	352914	8280	UK Biobank
Diseases of the ear and mastoid process	0.1302	0.09622	1.353	0.1762	0.005285	0.001381	0.9971	0.007265	0.001052	0.005592	361194	355942	5252	UK Biobank
Treatment/medication code: latanoprost	-0.145	0.1073	-1.352	0.1764	0.004367	0.001459	0.9958	0.007623	-0.0004508	0.005556	361141	360416	725	UK Biobank
Caudate volume	-0.1009	0.07465	-1.352	0.1765	0.2683	0.0435	0.9642	0.007362	0.002536	0.005915	30720	NA	NA	ENIGMA
Diagnoses - main ICD10: E66 Obesity	0.128	0.09472	1.351	0.1767	0.004897	0.001451	0.9917	0.00698	-0.006637	0.00599	361194	360841	353	UK Biobank
Treatment/medication code: diclofenac	0.1036	0.07677	1.349	0.1773	0.007458	0.001395	0.9912	0.006783	-0.008448	0.005524	361141	353596	7545	UK Biobank
Factors influencing health status and contact with health services	0.1046	0.07769	1.347	0.178	0.007199	0.001521	1.015	0.007586	-0.003393	0.005504	361194	315247	45947	UK Biobank
Diagnoses - main ICD10: N84 Polyp of female genital tract	-0.1333	0.09915	-1.344	0.1788	0.00521	0.001836	0.9881	0.008966	0.01321	0.005644	361194	354208	6986	UK Biobank
Diagnoses - main ICD10: K42 Umbilical hernia	0.1502	0.1121	1.34	0.1803	0.003874	0.001605	1.021	0.008076	0.0002206	0.00619	361194	358666	2528	UK Biobank
Cancer code, self-reported: squamous cell carcinoma	-0.2468	0.1843	-1.339	0.1807	0.001794	0.001208	0.9971	0.006759	0.003559	0.005691	361141	360692	449	UK Biobank
Diagnosed with life-threatening illness	0.1706	0.1277	1.336	0.1814	0.01438	0.004683	1.01	0.007336	-0.01151	0.006267	117617	98326	19291	UK Biobank
Weight change during worst episode of depression: Lost weight	-0.128	0.09581	-1.336	0.1816	0.04282	0.01032	0.9941	0.007599	0.006209	0.005975	56571	36258	20313	UK Biobank
Non-cancer illness code, self-reported: chronic obstructive airways disease/copd	0.1217	0.09121	1.335	0.1819	0.005426	0.001435	0.9919	0.006878	0.0003705	0.005581	361141	359856	1285	UK Biobank
Nitrogen dioxide air pollution; 2007	-0.06929	0.05193	-1.334	0.1821	0.02343	0.002022	1.077	0.008377	0.002824	0.005834	356078	NA	NA	UK Biobank
Age at death	0.2395	0.18	1.331	0.1832	0.06441	0.04807	0.9939	0.007008	-0.004228	0.005373	10483	NA	NA	UK Biobank
Illnesses of mother: None of the above (group 1)	-0.07821	0.05883	-1.329	0.1837	0.01661	0.002029	1.022	0.008935	-0.001658	0.006254	332611	194320	138291	UK Biobank
Sleeping too much	0.135	0.1016	1.329	0.1839	0.03905	0.01096	0.9974	0.007423	-5.609e-05	0.006184	45540	36186	9354	UK Biobank
Bleeding gums	0.06518	0.04934	1.321	0.1864	0.04882	0.00347	1.019	0.009301	0.00132	0.006701	461031	400821	60210	UK Biobank
Diagnoses - main ICD10: H53 Visual disturbances	0.1616	0.1223	1.321	0.1866	0.003321	0.00134	0.9848	0.007704	-0.01012	0.005156	361194	360634	560	UK Biobank
Visual disturbances	0.1616	0.1223	1.321	0.1866	0.003321	0.00134	0.9848	0.007704	-0.01012	0.005156	361194	360583	611	UK Biobank
Worked with materials containing asbestos: Often	-0.1341	0.1016	-1.32	0.1867	0.01967	0.006787	0.993	0.007417	0.001336	0.005434	76457	75195	1262	UK Biobank
Age at first episode of depression	-0.09567	0.07245	-1.32	0.1867	0.04926	0.009513	0.9986	0.007377	-0.002973	0.005377	61033	NA	NA	UK Biobank
Mental and behavioural disorders	0.1068	0.08143	1.312	0.1895	0.006622	0.001414	1.001	0.007483	-0.001904	0.005601	361194	356892	4302	UK Biobank
Nitrogen oxides air pollution; 2010	-0.07632	0.05821	-1.311	0.1898	0.01326	0.001616	1.026	0.007327	-0.002742	0.005399	356078	NA	NA	UK Biobank
Mouth/teeth dental problems: Toothache	0.09772	0.0746	1.31	0.1902	0.007976	0.001466	1.003	0.007611	0.004901	0.005205	359841	345364	14477	UK Biobank
Non-cancer illness code, self-reported: hiv/aids	-0.1394	0.1064	-1.31	0.1903	0.004171	0.001435	0.9804	0.008061	0.001637	0.006015	361141	360856	285	UK Biobank
Illnesses of mother: Stroke	-0.1087	0.08336	-1.304	0.1921	0.007375	0.001739	1.004	0.007843	0.008053	0.005754	331973	284488	47485	UK Biobank
Breakfast cereal consumed	0.1294	0.09942	1.302	0.193	0.02997	0.01022	1.017	0.007384	-0.001039	0.005307	51427	17358	34069	UK Biobank
Trouble falling asleep	-0.1226	0.09427	-1.3	0.1935	0.03742	0.0106	1.003	0.006671	0.01293	0.005796	45540	11049	34491	UK Biobank
Diagnoses - main ICD10: I26 Pulmonary embolism	0.1401	0.1078	1.299	0.1938	0.003611	0.001696	1.012	0.008762	-0.0009277	0.005424	361194	359076	2118	UK Biobank
Treatment/medication code: tramadol	0.08991	0.06928	1.298	0.1944	0.01079	0.001492	0.9993	0.007955	-0.0002158	0.00536	361141	357130	4011	UK Biobank
Mouth/teeth dental problems: Painful gums	0.117	0.09026	1.297	0.1947	0.005509	0.001527	1.012	0.007473	-0.001567	0.0058	359841	349726	10115	UK Biobank
Illnesses of father: None of the above (group 1)	-0.08855	0.06852	-1.292	0.1962	0.01436	0.00203	1.02	0.008296	-0.006764	0.005945	314797	198061	116736	UK Biobank
Diagnoses - main ICD10: M13 Other arthritis	0.1531	0.1185	1.292	0.1963	0.002862	0.001374	0.9899	0.006876	0.0002957	0.005139	361194	360084	1110	UK Biobank
Other arthritis (FG)	0.1531	0.1185	1.292	0.1963	0.002862	0.001374	0.9899	0.006876	0.0002957	0.005139	361194	359982	1212	UK Biobank
Qualifications: O levels/GCSEs or equivalent	-0.0474	0.03677	-1.289	0.1974	0.04415	0.002348	1.027	0.009715	0.02004	0.005736	357549	188877	168672	UK Biobank
Tinnitus: Yes, now most or all of the time	0.09613	0.07465	1.288	0.1978	0.03258	0.005188	1.005	0.007992	0.00158	0.005623	117882	110143	7739	UK Biobank
Primary gonarthrosis, bilateral	0.1373	0.1066	1.288	0.1979	0.003725	0.001276	1.001	0.00675	-0.006996	0.005147	361194	360345	849	UK Biobank
Diagnoses - main ICD10: M25 Other joint disorders, not elsewhere classified	0.1409	0.1095	1.287	0.1981	0.003957	0.001397	1.011	0.007446	0.004085	0.005834	361194	353976	7218	UK Biobank
Job SOC coding: Officers of non-governmental organisations	0.1918	0.1496	1.282	0.2	0.01086	0.005684	0.9952	0.007007	0.0003063	0.006051	91149	89570	1579	UK Biobank
Reason for glasses/contact lenses: For just reading/near work as you are getting older (called 'presbyopia')	-0.167	0.1304	-1.281	0.2002	0.002725	0.001486	1.092	0.008063	-0.003313	0.005446	360677	329181	31496	UK Biobank
Non-cancer illness code, self-reported: atrial fibrillation	0.1109	0.08689	1.277	0.2017	0.00585	0.001952	1.02	0.009669	-0.008453	0.005355	361141	358313	2828	UK Biobank
Age of stopping smoking	0.1568	0.1228	1.277	0.2017	0.03511	0.01442	1.008	0.006819	-0.002822	0.005678	33335	NA	NA	UK Biobank
Mean corpuscular hemoglobin	-0.03929	0.03084	-1.274	0.2028	0.2167	0.02857	1.048	0.04323	0.005587	0.006795	173498	NA	NA	UK Biobank and INTERVAL
Gonarthrosis [arthrosis of knee](FG)	-0.06672	0.05253	-1.27	0.2041	0.02149	0.00198	1.022	0.00891	0.01179	0.006079	361194	349294	11900	UK Biobank
Diagnoses - main ICD10: M17 Gonarthrosis [arthrosis of knee]	-0.06672	0.05253	-1.27	0.2041	0.02149	0.00198	1.022	0.00891	0.01179	0.006079	361194	349697	11497	UK Biobank
Forced vital capacity (FVC), Best measure	-0.03595	0.02831	-1.27	0.2042	0.2285	0.01022	1.128	0.02006	-0.01256	0.007517	272338	NA	NA	UK Biobank
Inverse distance to the nearest major road	0.2214	0.1744	1.269	0.2043	0.001891	0.001427	0.9922	0.007477	-0.006568	0.005572	356078	NA	NA	UK Biobank
Qualifications: College or University degree	0.03334	0.02628	1.269	0.2045	0.1697	0.00556	1.097	0.01593	0.02598	0.007052	357549	241568	115981	UK Biobank
Treatment/medication code: digoxin	-0.1744	0.1377	-1.267	0.2053	0.003035	0.001363	1.004	0.007521	-0.00584	0.005882	361141	360220	921	UK Biobank
NA	-0.07739	0.0614	-1.26	0.2075	0.02578	0.004445	1.026	0.01438	0.0007587	0.006701	361194	344663	16531	UK Biobank
Malignant neoplasm of skin	-0.07739	0.0614	-1.26	0.2075	0.02578	0.004445	1.026	0.01438	0.0007587	0.006701	361194	344663	16531	UK Biobank
Diagnoses - main ICD10: T84 Complications of internal orthopaedic prosthetic devices, implants and grafts	-0.1082	0.08588	-1.26	0.2077	0.006285	0.001338	0.994	0.006467	0.008883	0.005417	361194	357475	3719	UK Biobank
6mm cylindrical power (left)	-0.1143	0.09081	-1.259	0.2081	0.04083	0.007855	1.014	0.00754	0.002875	0.005862	65551	NA	NA	UK Biobank
Non-cancer illness code, self-reported: deep venous thrombosis (dvt)	0.1043	0.08296	1.257	0.2086	0.009943	0.00173	1.015	0.0119	-0.006283	0.006191	361141	353904	7237	UK Biobank
6mm regularity index (left)	-0.1553	0.1236	-1.257	0.2088	0.02818	0.01223	1.005	0.007113	0.01378	0.005679	40700	NA	NA	UK Biobank
Granulocyte count	0.0503	0.04002	1.257	0.2088	0.1647	0.0211	0.9608	0.0239	0.008296	0.006942	173484	NA	NA	UK Biobank and INTERVAL
Osteoporosis	0.1315	0.1047	1.256	0.209	0.004446	0.001471	0.9988	0.008087	0.003473	0.005329	361194	360261	933	UK Biobank
Job SOC coding: Occupational therapists	-0.1361	0.1084	-1.256	0.2092	0.01456	0.005593	0.9887	0.007163	0.006551	0.005643	91149	90850	299	UK Biobank
Ever had known person concerned about, or recommend reduction of, alcohol consumption: No	-0.08275	0.06595	-1.255	0.2096	0.02593	0.004574	1.009	0.007543	-0.0004799	0.00515	117880	10406	107474	UK Biobank
Treatment/medication code: xalatan 0.005% eye drops	-0.1002	0.07988	-1.254	0.2097	0.008059	0.001515	0.9887	0.007501	0.009033	0.005524	361141	360107	1034	UK Biobank
Non-butter spread type details: Flora Pro-Active or Benecol	-0.1093	0.08736	-1.252	0.2107	0.01255	0.00301	1.017	0.009458	0.004964	0.005739	190094	161046	29048	UK Biobank
Childhood sunburn occasions	-0.05595	0.04472	-1.251	0.2109	0.0777	0.0138	1.012	0.036	-0.003419	0.007599	269734	NA	NA	UK Biobank
Final attempt correct: yes	0.08985	0.07188	1.25	0.2113	0.02094	0.0042	1.003	0.007075	-0.001589	0.005406	119729	4722	115007	UK Biobank
Nervous feelings	0.0449	0.03596	1.249	0.2118	0.06496	0.003786	1.019	0.01224	0.006577	0.006121	351829	268709	83120	UK Biobank
Workplace full of chemical or other fumes: Rarely/never	0.1527	0.1225	1.247	0.2125	0.01302	0.005476	1.003	0.00719	-0.00694	0.005644	90344	4986	85358	UK Biobank
Job SOC coding: Personal assistants and other secretaries	-0.1264	0.1015	-1.245	0.213	0.02249	0.005392	0.9859	0.007188	0.003486	0.005807	91149	85731	5418	UK Biobank
Why stopped smoking: Financial reasons	-0.1358	0.1092	-1.244	0.2137	0.01763	0.00607	0.997	0.007908	0.009442	0.006127	88516	66863	21653	UK Biobank
Non-cancer illness code, self-reported: cervical spondylosis	0.1431	0.1152	1.242	0.2143	0.003838	0.00129	0.991	0.007107	-0.0009354	0.005568	361141	358631	2510	UK Biobank
Length of longest manic/irritable episode	-0.2596	0.2093	-1.24	0.2149	0.02694	0.02394	1.007	0.00708	0.003699	0.005404	19474	4092	15382	UK Biobank
Total sugars	0.1035	0.08354	1.239	0.2154	0.04346	0.01041	1.009	0.007285	0.001378	0.004885	51453	NA	NA	UK Biobank
Non-cancer illness code, self-reported: retinal detachment	0.1371	0.1109	1.236	0.2163	0.003487	0.001391	1.002	0.006999	-0.00292	0.005936	361141	359922	1219	UK Biobank
Worked with materials containing asbestos: Rarely/never	0.1624	0.1314	1.236	0.2164	0.009396	0.005474	0.9994	0.006479	-0.0004209	0.005549	85668	2162	83506	UK Biobank
Periodontitis + loose teeth	0.08125	0.06576	1.236	0.2166	0.04755	0.005202	0.9945	0.007357	-0.00668	0.005569	506594	470262	36332	UK Biobank +GLIDE
Diagnoses - main ICD10: M51 Other intervertebral disk disorders	0.1265	0.1024	1.235	0.2167	0.00518	0.001491	1.019	0.007106	0.002403	0.005428	361194	356504	4690	UK Biobank
Medication for cholesterol, blood pressure, diabetes, or take exogenous hormones: Hormone replacement therapy	0.08183	0.06627	1.235	0.2169	0.01791	0.002969	0.9986	0.00722	0.008934	0.005659	193148	178763	14385	UK Biobank
Treatment/medication code: enalapril	0.1245	0.1008	1.235	0.217	0.004734	0.001517	1.014	0.007075	-0.01324	0.004865	361141	358338	2803	UK Biobank
Chest pain felt during physical activity	0.1691	0.1371	1.233	0.2174	0.01702	0.009646	0.9978	0.00714	0.00241	0.005676	54011	1944	52067	UK Biobank
Destinations on discharge from hospital (recoded): Usual Place of residence: Living with relatives	0.1516	0.1229	1.233	0.2175	0.003585	0.001547	1.126	0.008185	-0.00679	0.00583	359439	349053	10386	UK Biobank
Leisure/social activities: Sports club or gym	-0.04935	0.04004	-1.233	0.2178	0.03596	0.002221	1.017	0.009169	0.0001483	0.005978	360063	251590	108473	UK Biobank
Vitamin C	0.1043	0.08473	1.232	0.2181	0.04201	0.01018	0.999	0.007729	-0.006061	0.005396	51453	NA	NA	UK Biobank
Obesity, other/unspecified	0.1139	0.0927	1.229	0.2191	0.005367	0.001486	0.9898	0.007184	-0.006618	0.006149	361194	360761	433	UK Biobank
Mineral and other dietary supplements: Zinc	0.08342	0.06812	1.225	0.2207	0.01063	0.001497	0.9909	0.006843	0.01324	0.005868	360016	345614	14402	UK Biobank
Illness, injury, bereavement, stress in last 2 years: Marital separation/divorce	0.1203	0.09849	1.221	0.2219	0.004163	0.001323	1.007	0.007297	-0.002983	0.005275	358836	348020	10816	UK Biobank
Wears glasses or contact lenses	0.06649	0.05454	1.219	0.2228	0.01828	0.001587	0.9932	0.008386	0.003994	0.005252	360677	38909	321768	UK Biobank
Illnesses of father: None of the above (group 2)	-0.1078	0.08853	-1.218	0.2234	0.008171	0.001667	1.008	0.007824	0.007416	0.005544	318545	80871	237674	UK Biobank
Treatment/medication code: arthrotec 50 tablet	0.1785	0.1467	1.217	0.2235	0.002351	0.001368	0.9936	0.007721	-0.00798	0.005655	361141	360833	308	UK Biobank
Particulate matter air pollution (pm10); 2010	-0.1523	0.1258	-1.211	0.226	0.003415	0.001487	1.009	0.007291	0.000972	0.005401	329886	NA	NA	UK Biobank
Diagnoses - main ICD10: K20 Oesophagitis	0.1531	0.1266	1.21	0.2263	0.002871	0.00142	1.016	0.007308	-0.0008736	0.005648	361194	356395	4799	UK Biobank
Job SOC coding: Journalists, newspaper and periodical editors	-0.1412	0.1168	-1.209	0.2268	0.01209	0.005128	0.995	0.006276	0.0003894	0.005314	91149	90642	507	UK Biobank
Entropion and trichiasis of eyelid	0.1503	0.1243	1.209	0.2268	0.003098	0.001364	0.9975	0.006942	-0.0009286	0.005725	361194	360642	552	UK Biobank
Diagnoses - main ICD10: K22 Other diseases of oesophagus	0.09328	0.07731	1.207	0.2276	0.006501	0.001647	1.011	0.008101	0.002314	0.005918	361194	355700	5494	UK Biobank
Age first had sexual intercourse	-0.03302	0.02741	-1.205	0.2283	0.1304	0.005368	1.028	0.01527	0.0108	0.006646	317694	NA	NA	UK Biobank
Treatment/medication code: gabapentin	-0.1523	0.1267	-1.202	0.2293	0.003881	0.001654	0.9923	0.007524	0.01024	0.005782	361141	359467	1674	UK Biobank
Mood [affective] disorders	0.1036	0.08615	1.202	0.2294	0.0056	0.001465	0.9983	0.007951	0.0001209	0.005665	361194	359648	1546	UK Biobank
Mood disorders	0.1036	0.08615	1.202	0.2294	0.0056	0.001465	0.9983	0.007951	0.0001209	0.005665	361194	359648	1546	UK Biobank
Diagnoses - main ICD10: H80 Otosclerosis	-0.1271	0.1058	-1.202	0.2295	0.004891	0.001623	0.9928	0.00789	0.002356	0.006049	361194	360973	221	UK Biobank
Trunk fat mass	0.03253	0.0271	1.2	0.2301	0.2344	0.009021	1.095	0.02339	-0.01412	0.007674	354597	NA	NA	UK Biobank
Duration to first press of snap-button in each round	0.04048	0.03382	1.197	0.2313	0.06121	0.002541	1.022	0.009173	-0.008698	0.006037	358500	NA	NA	UK Biobank
Sum neutrophil eosinophil counts	0.0479	0.04003	1.197	0.2315	0.1645	0.02084	0.9599	0.0236	0.008337	0.006946	173504	NA	NA	UK Biobank and INTERVAL
Reason for reducing amount of alcohol drunk: Financial reasons	-0.1294	0.1083	-1.195	0.2321	0.009599	0.004053	1.001	0.007377	0.0003637	0.005342	134033	126979	7054	UK Biobank
Whole body fat mass	0.03188	0.02668	1.195	0.2321	0.233	0.009155	1.087	0.02273	-0.01508	0.007531	354244	NA	NA	UK Biobank
Leisure/social activities: Other group activity	0.05923	0.04958	1.195	0.2322	0.02181	0.001927	1.023	0.008558	0.01188	0.005922	360063	279885	80178	UK Biobank
Non-cancer illness code, self-reported: alcohol dependency	0.1848	0.1549	1.194	0.2327	0.002079	0.001452	0.9995	0.007498	1.209e-05	0.005412	361141	360580	561	UK Biobank
Job coding: officer of ngo, trade union organiser/official, charity administrator, secretary of research or charity or political or professional or trade association or trade union	0.1765	0.1484	1.19	0.2342	0.01095	0.005577	0.9952	0.006986	0.000501	0.006021	89866	88309	1557	UK Biobank
Calcium	0.1164	0.09804	1.187	0.2352	0.03538	0.01072	0.9937	0.007299	0.004818	0.005426	51453	NA	NA	UK Biobank
Substances taken for anxiety: Medication prescribed to you (for at least two weeks)	0.07423	0.06257	1.186	0.2355	0.04668	0.005648	0.9979	0.00804	0.006572	0.006158	98990	86048	12942	UK Biobank
Treatment/medication code: alendronate sodium	0.1066	0.09018	1.183	0.237	0.006481	0.001537	0.9954	0.00712	0.002354	0.005371	361141	357038	4103	UK Biobank
Treatment/medication code: spiriva 18micrograms inhalation capsule	0.1413	0.1194	1.183	0.237	0.003368	0.001304	0.9986	0.006861	-0.003092	0.005619	361141	360602	539	UK Biobank
Diagnoses - main ICD10: S01 Open wound of head	0.1741	0.1475	1.18	0.2379	0.002998	0.001395	0.9919	0.007662	-0.006291	0.005432	361194	359500	1694	UK Biobank
Treatment/medication code: propranolol	-0.1221	0.1035	-1.18	0.238	0.004156	0.001318	0.9945	0.006698	0.008385	0.005561	361141	358736	2405	UK Biobank
High light scatter reticulocyte count	-0.04394	0.03734	-1.177	0.2392	0.1562	0.02005	1.06	0.04815	0.001928	0.006565	173488	NA	NA	UK Biobank and INTERVAL
Retinol	-0.1437	0.1228	-1.17	0.2419	0.02057	0.01068	1.012	0.006838	0.005943	0.005271	49890	NA	NA	UK Biobank
Lymphocyte count	-0.053	0.0453	-1.17	0.242	0.05118	0.004341	1.056	0.01605	-0.008783	0.006546	349856	NA	NA	UK Biobank
Age started wearing glasses or contact lenses	-0.04406	0.03767	-1.169	0.2422	0.09562	0.004905	1.054	0.01387	-0.01368	0.007489	310992	NA	NA	UK Biobank
6mm weak meridian (right)	0.04323	0.03713	1.164	0.2442	0.3467	0.0288	1.092	0.02589	-0.01529	0.006648	66256	NA	NA	UK Biobank
Alcohol drinker status: Previous	0.06668	0.05735	1.163	0.2449	0.01344	0.001648	1.004	0.00781	0.00151	0.00578	360726	348162	12564	UK Biobank
Qualifications: None of the above	-0.03114	0.02687	-1.159	0.2466	0.105	0.00392	1.067	0.01385	-0.01876	0.006085	357549	296456	61093	UK Biobank
Myeloid white cell count	0.04695	0.04063	1.156	0.2478	0.1673	0.02021	0.9667	0.02345	0.008192	0.006993	173503	NA	NA	UK Biobank and INTERVAL
Job SOC coding: Physicists, geologists and meteorologists	0.1243	0.1076	1.154	0.2484	0.02207	0.00584	0.9788	0.007696	-0.01316	0.006181	91149	90416	733	UK Biobank
6mm weak meridian (left)	0.04326	0.0376	1.151	0.2499	0.3499	0.03	1.09	0.02597	-0.01558	0.006471	65551	NA	NA	UK Biobank
Activities undertaken to treat anxiety: Other therapeutic activities such as mindfulness, yoga or art classes	0.1131	0.09843	1.15	0.2503	0.02204	0.005081	1.009	0.006265	0.005566	0.00546	98990	93255	5735	UK Biobank
Job coding: physicist, astronomer, geologist, geophysicist, meteorologist, oceanographer, seismologist	0.1461	0.1274	1.147	0.2514	0.01568	0.005832	0.9853	0.007788	-0.01216	0.006084	89866	89281	585	UK Biobank
Treatment/medication code: rosiglitazone	-0.1276	0.1112	-1.147	0.2515	0.003668	0.00124	0.9982	0.006921	-0.0004985	0.005602	361141	360610	531	UK Biobank
Father's age at death	-0.06807	0.0595	-1.144	0.2526	0.02605	0.002721	1.016	0.008343	0.008073	0.006218	266231	NA	NA	UK Biobank
Ankle spacing width (right)	-0.04078	0.03565	-1.144	0.2526	0.2878	0.01717	1.067	0.01494	-0.006232	0.007071	114614	NA	NA	UK Biobank
Treatment/medication code: pantoprazole	0.1586	0.1396	1.136	0.2558	0.002537	0.001237	0.9867	0.006196	-0.003032	0.00543	361141	360482	659	UK Biobank
Ohter specific/unspecified arthritis	0.1397	0.1235	1.131	0.2579	0.002543	0.001343	0.9933	0.00681	0.0009241	0.00525	361194	360112	1082	UK Biobank
Reticulocyte count	-0.04165	0.03682	-1.131	0.2581	0.1644	0.02102	1.043	0.04495	0.002447	0.006646	173513	NA	NA	UK Biobank and INTERVAL
Milk type used: Other type of milk	0.2068	0.183	1.13	0.2585	0.001668	0.001346	1.009	0.006935	0.005854	0.00535	360806	356593	4213	UK Biobank
Mineral and other dietary supplements: None of the above	-0.04771	0.04233	-1.127	0.2597	0.02964	0.001997	1.016	0.008113	-0.009153	0.00575	360016	155206	204810	UK Biobank
Underlying (primary) cause of death: ICD10: C34.9 Bronchus or lung, unspecified	0.1927	0.1731	1.114	0.2654	0.0652	0.04974	1	0.007258	-0.002496	0.005349	9092	7992	1100	UK Biobank
Signal-to-noise-ratio (SNR) of triplet (left)	-0.0977	0.08795	-1.111	0.2666	0.02297	0.004735	1.003	0.007443	0.005753	0.005968	116790	NA	NA	UK Biobank
Job coding: journalist, reporter, newspaper correspondent, sports writer, newspaper or magazine editor	-0.133	0.1197	-1.111	0.2667	0.01204	0.005135	0.9952	0.006176	-0.0001766	0.005343	89866	89370	496	UK Biobank
Weight	0.02958	0.02664	1.11	0.2669	0.2583	0.01107	1.108	0.02601	-0.0175	0.007655	354838	NA	NA	UK Biobank
Diagnoses - main ICD10: M81 Osteoporosis without pathological fracture	0.145	0.1307	1.11	0.2672	0.002881	0.001468	1.001	0.007499	0.004696	0.005275	361194	360457	737	UK Biobank
Illnesses of mother: None of the above (group 2)	0.09431	0.08505	1.109	0.2675	0.007751	0.001656	1.005	0.007169	-0.01323	0.005406	334401	76684	257717	UK Biobank
Leg fat mass (right)	0.02938	0.0265	1.109	0.2676	0.2169	0.008529	1.076	0.02075	-0.01533	0.007355	354807	NA	NA	UK Biobank
Diagnoses - main ICD10: G37 Other demyelinating diseases of central nervous system	-0.1668	0.1508	-1.106	0.2686	0.001992	0.001364	0.9887	0.008013	0.005423	0.005833	361194	360994	200	UK Biobank
Treatment/medication code: quinine	0.09054	0.08207	1.103	0.27	0.006643	0.001469	1.007	0.00774	0.001205	0.005735	361141	358712	2429	UK Biobank
Diagnoses - main ICD10: N20 Calculus of kidney and ureter	0.07561	0.06871	1.1	0.2712	0.01212	0.001734	1.012	0.008575	-0.009313	0.006407	361194	357654	3540	UK Biobank
6mm asymmetry index (left)	-0.08909	0.08101	-1.1	0.2715	0.07539	0.01418	1.018	0.007777	0.004695	0.005616	40683	NA	NA	UK Biobank
Cylindrical power (left)	0.1079	0.09835	1.097	0.2725	0.02086	0.006647	1.009	0.007772	-0.002031	0.005617	77739	NA	NA	UK Biobank
Other specified/unspecified disorders of synovium and tendon +Other specified/unspecified bursopathies	0.1435	0.1312	1.094	0.2739	0.002825	0.001441	0.9828	0.00844	0.0008053	0.005882	361194	360851	343	UK Biobank
Tinnitus: Yes, now some of the time	0.1881	0.1727	1.089	0.2761	0.005796	0.003937	1.005	0.00714	0.001159	0.005236	117882	107393	10489	UK Biobank
Diagnoses - main ICD10: K62 Other diseases of anus and rectum	0.146	0.1343	1.087	0.2771	0.003062	0.00151	1.01	0.007384	0.009834	0.00585	361194	347312	13882	UK Biobank
Weight	0.02919	0.02686	1.087	0.2772	0.258	0.01111	1.11	0.02637	-0.01759	0.007759	360116	NA	NA	UK Biobank
FI5 : family relationship calculation	0.06546	0.06024	1.087	0.2772	0.04329	0.005385	1.006	0.007462	0.008726	0.005905	113356	57434	55922	UK Biobank
logMAR, final (right)	-0.1006	0.09262	-1.086	0.2775	0.02555	0.007171	0.9969	0.007956	0.007654	0.005384	79293	NA	NA	UK Biobank
Non-butter spread type details: Soft (tub) margarine	-0.06217	0.0574	-1.083	0.2788	0.02652	0.003271	1.016	0.008188	-0.003344	0.005434	190094	166469	23625	UK Biobank
Handedness (chirality/laterality): Right-handed	-0.07612	0.07029	-1.083	0.2789	0.009468	0.001527	1.007	0.007529	-0.001642	0.005675	360913	40671	320242	UK Biobank
Leg fat percentage (right)	0.03067	0.02837	1.081	0.2797	0.2304	0.00727	1.101	0.02084	-0.01552	0.008047	354811	NA	NA	UK Biobank
Illnesses of mother: Diabetes	-0.06307	0.05852	-1.078	0.2812	0.01899	0.001965	1.021	0.01016	0.002891	0.005814	331142	300370	30772	UK Biobank
3mm strong meridian (right)	0.04042	0.03751	1.078	0.2812	0.3113	0.02971	1.103	0.03246	-0.01307	0.006499	75410	NA	NA	UK Biobank
Professional informed about anxiety	0.08811	0.0819	1.076	0.282	0.05562	0.01279	0.9904	0.006704	-0.0004219	0.005217	36366	14128	22238	UK Biobank
6mm cylindrical power angle (right)	-0.07396	0.06891	-1.073	0.2832	0.06523	0.008933	1.009	0.007667	0.005544	0.005677	66237	NA	NA	UK Biobank
Non-cancer illness code, self-reported: cataract	0.1134	0.1071	1.059	0.2897	0.003595	0.001471	0.9986	0.007456	0.001497	0.005421	361141	356096	5045	UK Biobank
Standing height	0.02905	0.02746	1.058	0.2901	0.4592	0.0235	1.341	0.06199	-0.01788	0.01035	360388	NA	NA	UK Biobank
Illnesses of siblings: Heart disease	-0.06793	0.0643	-1.056	0.2908	0.01747	0.002158	1.01	0.008192	0.005228	0.005943	280784	252088	28696	UK Biobank
Non-cancer illness code, self-reported: mania/bipolar disorder/manic depression	0.1025	0.09717	1.055	0.2914	0.005147	0.001399	1.005	0.007363	0.0001836	0.005609	361141	360133	1008	UK Biobank
Ever had eye surgery	-0.1039	0.09857	-1.054	0.2917	0.02037	0.005811	0.9919	0.006818	0.01007	0.005081	79912	74087	5825	UK Biobank
Bread type: Other type of bread	0.1109	0.1054	1.052	0.2927	0.004676	0.001508	1.001	0.007944	0.005824	0.005641	348424	333983	14441	UK Biobank
Year ended full time education	0.04843	0.04607	1.051	0.2932	0.1446	0.00902	1.047	0.009237	0.005065	0.006626	91777	NA	NA	UK Biobank
Bread type: Brown	-0.06437	0.06134	-1.049	0.2939	0.01153	0.001541	0.9975	0.007538	-0.000205	0.00543	348424	306906	41518	UK Biobank
High light scatter reticulocyte percentage of red cells	-0.03896	0.03714	-1.049	0.2941	0.1569	0.01974	1.059	0.04876	0.001368	0.006666	173489	NA	NA	UK Biobank and INTERVAL
Job coding: software professional, analyst-programmer, computer programmer, software analyst or engineer, systems designer or programmer	-0.1534	0.1464	-1.048	0.2946	0.01175	0.005486	1.02	0.006804	0.01601	0.006414	89866	86421	3445	UK Biobank
Headaches for 3+ months	0.0689	0.0659	1.045	0.2958	0.05428	0.007655	1.012	0.007619	-0.004865	0.005658	70181	38106	32075	UK Biobank
Former alcohol drinker	0.08766	0.08385	1.045	0.2958	0.1099	0.02169	0.9995	0.006902	-0.003492	0.005746	23745	11181	12564	UK Biobank
Current employment status: Retired	0.07978	0.07637	1.045	0.2962	0.008717	0.001546	1.003	0.007602	-0.006344	0.005532	359931	227000	132931	UK Biobank
Diagnoses - main ICD10: M47 Spondylosis	0.1253	0.1205	1.04	0.2984	0.003527	0.00151	1.001	0.006923	0.005225	0.005366	361194	359190	2004	UK Biobank
Carbohydrate	0.1016	0.09771	1.04	0.2985	0.03157	0.009996	1.01	0.006666	0.002261	0.005216	51453	NA	NA	UK Biobank
Ventricular rate	-0.1108	0.1067	-1.039	0.2989	0.1442	0.04948	1	0.007988	-0.003114	0.005529	10817	NA	NA	UK Biobank
Diagnoses - main ICD10: J84 Other interstitial pulmonary diseases	0.1459	0.1407	1.037	0.2997	0.003337	0.001387	0.9958	0.008196	-0.006475	0.006382	361194	360852	342	UK Biobank
Leg fat mass (left)	0.02737	0.02645	1.035	0.3007	0.2169	0.008548	1.077	0.02086	-0.01475	0.00734	354788	NA	NA	UK Biobank
Heel bone mineral density (BMD)	0.03801	0.03686	1.031	0.3025	0.2461	0.02228	1.106	0.03131	-0.02116	0.007434	206496	NA	NA	UK Biobank
Diagnoses - main ICD10: C25 Malignant neoplasm of pancreas	-0.1245	0.1208	-1.031	0.3026	0.003225	0.001405	0.9778	0.006937	-0.0002515	0.005645	361194	360791	403	UK Biobank
Pulse rate	0.04184	0.04062	1.03	0.303	0.1235	0.0129	1.03	0.01429	-0.004106	0.006285	118850	NA	NA	UK Biobank
Heel quantitative ultrasound index (QUI), direct entry	0.03815	0.03707	1.029	0.3035	0.2436	0.02206	1.104	0.03105	-0.02123	0.007443	206589	NA	NA	UK Biobank
Lateral epicondylitis	0.1431	0.1392	1.028	0.304	0.00271	0.001373	0.9912	0.006728	-0.0002886	0.005832	361194	360669	525	UK Biobank
Pain type(s) experienced in last month: Stomach or abdominal pain	0.05202	0.05067	1.027	0.3046	0.0206	0.001782	1.011	0.008482	0.007354	0.005821	360391	330085	30306	UK Biobank
Age high blood pressure diagnosed	-0.0766	0.07475	-1.025	0.3055	0.04914	0.008044	1.016	0.008426	2.59e-06	0.006001	87024	NA	NA	UK Biobank
Vitamin D	0.116	0.1133	1.024	0.3059	0.02693	0.009978	0.9882	0.006866	-0.007824	0.005674	51453	NA	NA	UK Biobank
Shoulder lesions	0.07609	0.0744	1.023	0.3064	0.01003	0.001487	0.9987	0.007874	-0.0001026	0.006291	361194	353951	7243	UK Biobank
Diagnoses - main ICD10: M75 Shoulder lesions	0.07607	0.07448	1.021	0.3071	0.01	0.001486	0.9986	0.007873	-8.357e-06	0.006289	361194	354154	7040	UK Biobank
6mm regularity index (right)	-0.1015	0.09983	-1.016	0.3094	0.04429	0.0126	1.004	0.007412	0.008913	0.006031	41455	NA	NA	UK Biobank
Myocardial infarction, strict	0.05893	0.05806	1.015	0.3102	0.0156	0.001828	1.002	0.008154	-0.01078	0.00586	361194	354176	7018	UK Biobank
Myocardial infarction	0.05893	0.05806	1.015	0.3102	0.0156	0.001828	1.002	0.008154	-0.01078	0.00586	361194	354176	7018	UK Biobank
Treatment/medication code: calcium salts	-0.136	0.1344	-1.012	0.3113	0.002466	0.001315	0.9939	0.006722	0.004756	0.00569	361141	358933	2208	UK Biobank
Speech-reception-threshold (SRT) estimate (left)	-0.08796	0.08694	-1.012	0.3117	0.02395	0.004561	1.01	0.007414	0.005195	0.005963	114811	NA	NA	UK Biobank
Ease of skin tanning	-0.05168	0.05143	-1.005	0.315	0.09717	0.03669	1.114	0.1059	0.003868	0.008443	353697	NA	NA	UK Biobank
Reason for glasses/contact lenses: For a 'squint' or 'turn' in an eye since childhood (called 'strabismus')	0.09955	0.09925	1.003	0.3159	0.004854	0.00137	0.9955	0.007183	3.283e-05	0.005502	360677	359111	1566	UK Biobank
Substances taken for depression: Medication prescribed to you (for at least two weeks)	0.04964	0.04956	1.002	0.3165	0.05564	0.005076	1.003	0.008245	0.007874	0.005916	117763	89412	28351	UK Biobank
Diagnoses - main ICD10: N92 Excessive, frequent and irregular menstruation	0.08194	0.08185	1.001	0.3168	0.007131	0.001694	0.9999	0.007918	0.005313	0.005537	361194	352719	8475	UK Biobank
Reticulocyte fraction of red cells	-0.03667	0.0367	-0.9994	0.3176	0.1651	0.02108	1.039	0.04532	0.002012	0.006867	173514	NA	NA	UK Biobank and INTERVAL
Manifestations of mania or irritability: My thoughts were racing	0.08078	0.08087	0.9989	0.3178	0.02691	0.005142	1.011	0.008146	-0.0002101	0.006051	114422	103842	10580	UK Biobank
Ever addicted to alcohol	-0.1126	0.1129	-0.9973	0.3186	0.1994	0.08034	1.002	0.007458	0.007108	0.005277	6514	3736	2778	UK Biobank
Ever had same-sex intercourse	0.06966	0.06993	0.9961	0.3192	0.01159	0.001723	1.011	0.007791	0.001814	0.005809	326849	315740	11109	UK Biobank
Neck/shoulder pain for 3+ months	0.1042	0.1048	0.9937	0.3204	0.02112	0.00624	1.009	0.007453	0.002577	0.00602	81276	25120	56156	UK Biobank
Final attempt correct: no	-0.07407	0.07461	-0.9928	0.3208	0.01968	0.004221	1.003	0.007127	0.0003708	0.005392	119729	115148	4581	UK Biobank
Red cell distribution width	0.0349	0.03515	0.9929	0.3208	0.1857	0.02521	0.9823	0.03554	-0.001072	0.006831	173512	NA	NA	UK Biobank and INTERVAL
Dorsalgia	0.06396	0.06444	0.9926	0.3209	0.01433	0.001731	1	0.0079	-0.004183	0.006028	361194	352395	8799	UK Biobank
Diagnoses - main ICD10: M54 Dorsalgia	0.06396	0.06444	0.9926	0.3209	0.01433	0.001731	1	0.0079	-0.004183	0.006028	361194	352833	8361	UK Biobank
Diagnoses - main ICD10: I21 Acute myocardial infarction	0.0577	0.05823	0.991	0.3217	0.01459	0.001674	0.999	0.007872	-0.01123	0.005803	361194	355246	5948	UK Biobank
Diagnoses - main ICD10: H65 Nonsuppurative otitis media	-0.1093	0.1104	-0.99	0.3222	0.003595	0.001402	0.9931	0.007068	0.0108	0.005683	361194	360413	781	UK Biobank
Diseases of the nervous system	0.05262	0.05331	0.987	0.3236	0.0157	0.001713	1.012	0.007941	0.002745	0.006185	361194	339871	21323	UK Biobank
Illnesses of siblings: Prostate cancer	0.137	0.1388	0.9871	0.3236	0.003003	0.001941	0.9941	0.007356	0.001143	0.005444	279171	274653	4518	UK Biobank
Disorders of muscles	-0.1487	0.1515	-0.9815	0.3263	0.002464	0.001467	0.992	0.006909	0.01092	0.00584	361194	360707	487	UK Biobank
Ever self-harmed	0.08176	0.08331	0.9814	0.3264	0.02205	0.004665	1.016	0.00783	0.005353	0.0053	117733	112634	5099	UK Biobank
Vitamin and mineral supplements: Vitamin B	0.07458	0.07633	0.9771	0.3285	0.007232	0.001628	1.004	0.00756	0.006948	0.005436	359245	344453	14792	UK Biobank
Age started smoking in former smokers	-0.06959	0.07134	-0.9755	0.3293	0.04486	0.007302	1.005	0.008007	0.005697	0.006178	88898	NA	NA	UK Biobank
Ankle spacing width (left)	-0.03459	0.03546	-0.9753	0.3294	0.2924	0.01711	1.064	0.01572	-0.007917	0.007213	114630	NA	NA	UK Biobank
3mm cylindrical power angle (right)	-0.06663	0.06833	-0.9751	0.3295	0.06528	0.00823	1.018	0.008152	-0.001321	0.005466	75401	NA	NA	UK Biobank
Mean platelet (thrombocyte) volume	-0.03106	0.03188	-0.9745	0.3298	0.2626	0.03091	1.354	0.09153	0.001006	0.008668	350470	NA	NA	UK Biobank
Vitamin E	0.1151	0.1184	0.9728	0.3306	0.02064	0.009338	1.004	0.006919	0.002971	0.005371	51453	NA	NA	UK Biobank
Treatment/medication code: calcium carbonate+cholecalciferol 1.25g/5micrograms tablet	0.1401	0.1446	0.9685	0.3328	0.002992	0.001613	0.9809	0.008455	-0.0009437	0.006685	361141	360989	152	UK Biobank
Venous thromboembolism	0.06228	0.06466	0.9631	0.3355	0.01172	0.00228	1.009	0.01143	0.001369	0.005489	361194	356574	4620	UK Biobank
3mm strong meridian (left)	0.03635	0.03789	0.9595	0.3373	0.3128	0.02895	1.093	0.03089	-0.01203	0.006384	75398	NA	NA	UK Biobank
Type of special diet followed: Other	0.1059	0.1105	0.9584	0.3379	0.02172	0.0094	0.9937	0.007158	0.0008562	0.005239	51427	49672	1755	UK Biobank
Diagnoses - main ICD10: C61 Malignant neoplasm of prostate	-0.07788	0.08142	-0.9565	0.3388	0.008079	0.00172	1.018	0.008979	0.003975	0.005336	361194	356852	4342	UK Biobank
Illnesses of father: Prostate cancer	0.08718	0.0912	0.9558	0.3391	0.007555	0.001887	1.013	0.008623	-0.0001235	0.005302	312544	288337	24207	UK Biobank
3mm regularity index (left)	0.1189	0.1244	0.9553	0.3394	0.01477	0.006771	1.011	0.006732	0.002283	0.005584	73829	NA	NA	UK Biobank
Haematocrit percentage	-0.03314	0.03472	-0.9545	0.3398	0.1247	0.01047	1.223	0.04537	-0.009039	0.007614	350475	NA	NA	UK Biobank
Job SOC coding: Other goods handling and storage occupations n.e.c.	-0.1667	0.1747	-0.9543	0.3399	0.005895	0.005218	0.9994	0.007229	0.006539	0.005633	91149	89870	1279	UK Biobank
Body fat percentage	0.02696	0.02829	0.953	0.3406	0.2286	0.007908	1.098	0.02205	-0.01112	0.007991	354628	NA	NA	UK Biobank
Englyst dietary fibre	0.08134	0.08545	0.952	0.3411	0.04085	0.01046	1.011	0.00667	-0.002374	0.005167	51453	NA	NA	UK Biobank
Light smokers, at least 100 smokes in lifetime	0.04434	0.04664	0.9506	0.3418	0.08006	0.007712	1.007	0.008198	-0.01487	0.005549	97021	52768	44253	UK Biobank
Diagnoses - main ICD10: Z36 Antenatal screening	-0.1006	0.1059	-0.9496	0.3423	0.003921	0.00155	0.9916	0.007385	0.005456	0.005543	361194	360353	841	UK Biobank
Restless during period of worst anxiety	-0.1336	0.1408	-0.9485	0.3429	0.02915	0.01507	1.001	0.006386	-0.005392	0.005912	33864	13536	20328	UK Biobank
Pulse wave reflection index	-0.1445	0.1527	-0.9461	0.3441	0.006983	0.004388	1.008	0.007446	-0.0001754	0.005436	118850	NA	NA	UK Biobank
Treatment/medication code: diazepam	-0.1127	0.1192	-0.9456	0.3443	0.003304	0.001307	0.9843	0.006086	0.005807	0.005147	361141	360154	987	UK Biobank
Job SOC coding: Chemists	0.08297	0.08785	0.9445	0.3449	0.01738	0.005451	0.9941	0.007143	-0.002157	0.005045	91149	90069	1080	UK Biobank
Milk type used: Never/rarely have milk	-0.06115	0.06484	-0.9431	0.3456	0.0129	0.001619	1.015	0.007668	0.01966	0.006132	360806	349219	11587	UK Biobank
Ganglion	-0.114	0.121	-0.9426	0.3459	0.003231	0.001454	0.9963	0.007673	0.01055	0.005219	361194	358955	2239	UK Biobank
Workplace very dusty: Sometimes	0.08651	0.09183	0.9421	0.3461	0.02044	0.005462	1.015	0.006527	0.003097	0.005544	89965	58379	31586	UK Biobank
Qualifications: CSEs or equivalent	0.0485	0.05151	0.9417	0.3464	0.02082	0.001853	1.02	0.007516	-0.008364	0.006144	357549	310877	46672	UK Biobank
6mm asymmetry index (right)	-0.07375	0.07844	-0.9402	0.3471	0.07688	0.01426	1.009	0.008072	0.006192	0.005899	41390	NA	NA	UK Biobank
Non-cancer illness code, self-reported: ulcerative colitis	0.09005	0.09578	0.9401	0.3472	0.005422	0.001697	1.016	0.008555	0.009311	0.005525	361141	359225	1916	UK Biobank
Diagnoses - main ICD10: K90 Intestinal malabsorption	0.1127	0.1199	0.9398	0.3473	0.004711	0.001585	0.992	0.007363	0.01184	0.005883	361194	360272	922	UK Biobank
Type of fat/oil used in cooking: Polyunsaturated margarine	-0.1409	0.1503	-0.9377	0.3484	0.01767	0.01049	0.9964	0.007354	0.006877	0.005394	51427	47233	4194	UK Biobank
Arm fat mass (right)	0.02454	0.02618	0.9373	0.3486	0.2076	0.008885	1.068	0.02084	-0.0106	0.007161	354736	NA	NA	UK Biobank
Diagnoses - main ICD10: M20 Acquired deformities of fingers and toes	0.06045	0.06475	0.9335	0.3506	0.01345	0.001527	0.9995	0.007701	0.001492	0.005987	361194	353421	7773	UK Biobank
Own or rent accommodation lived in: Rent - from private landlord or letting agency	0.07779	0.08341	0.9327	0.351	0.006564	0.001419	1.002	0.007285	0.002397	0.005249	356340	346887	9453	UK Biobank
Treatment/medication code: venlafaxine	-0.0858	0.09204	-0.9322	0.3512	0.004908	0.001488	0.9869	0.007852	0.002542	0.00522	361141	359608	1533	UK Biobank
Manifestations of mania or irritability: I was easily distracted	0.08369	0.09	0.9299	0.3524	0.01992	0.00482	1.001	0.006823	0.002849	0.005741	114422	105260	9162	UK Biobank
Basal metabolic rate	0.02593	0.02791	0.9293	0.3527	0.277	0.01291	1.152	0.03136	-0.01866	0.007955	354825	NA	NA	UK Biobank
Which eye(s) affected by myopia (short sight): Both eyes	-0.1006	0.1084	-0.9285	0.3531	0.04916	0.01896	0.9913	0.007345	0.0008019	0.00532	29317	3133	26184	UK Biobank
3mm cylindrical power (right)	-0.05264	0.05686	-0.9257	0.3546	0.07756	0.008209	1.004	0.007763	-0.0007703	0.006213	75410	NA	NA	UK Biobank
Non-cancer illness code, self-reported: pneumonia	0.106	0.1145	0.9258	0.3546	0.003021	0.001439	0.9996	0.007345	0.004932	0.005291	361141	355959	5182	UK Biobank
Basophill percentage	0.04706	0.05086	0.9253	0.3548	0.02876	0.003925	1.043	0.01705	0.003753	0.006243	349861	NA	NA	UK Biobank
Sleep disorders (combined)	0.08074	0.08735	0.9244	0.3553	0.006693	0.001324	0.9965	0.007425	0.006675	0.006026	361194	358243	2951	UK Biobank
Arm fat mass (left)	0.02407	0.02605	0.9241	0.3554	0.2042	0.008797	1.067	0.02071	-0.01064	0.007156	354673	NA	NA	UK Biobank
Home area population density - urban or rural: Scotland - Large Urban Area	0.08205	0.08893	0.9227	0.3562	0.007563	0.001992	1.262	0.009366	-0.008713	0.006169	357712	336781	20931	UK Biobank
Trunk fat percentage	0.02648	0.02872	0.9223	0.3564	0.2136	0.007782	1.097	0.02188	-0.009452	0.007873	354619	NA	NA	UK Biobank
Non-cancer illness code, self-reported: sleep apnoea	0.08268	0.0898	0.9207	0.3572	0.004513	0.001359	0.9961	0.00733	-0.004289	0.00509	361141	359978	1163	UK Biobank
Treatment/medication code: ramipril	0.05084	0.05525	0.9201	0.3575	0.01748	0.001891	1.017	0.008594	-0.008754	0.005864	361141	344272	16869	UK Biobank
Non-cancer illness code, self-reported: crohns disease	0.08859	0.09638	0.9192	0.358	0.005347	0.001459	1	0.007693	0.007507	0.005445	361141	360045	1096	UK Biobank
Workplace very hot: Sometimes	0.06445	0.07014	0.9188	0.3582	0.03973	0.007091	1.002	0.007649	-0.003569	0.006225	90544	38335	52209	UK Biobank
Treatment/medication code: cod liver oil capsule	-0.09086	0.09896	-0.9182	0.3585	0.00451	0.001388	1.009	0.00657	0.003362	0.005618	361141	340107	21034	UK Biobank
Job coding: ship's engineer, ship's purser	-0.1244	0.1355	-0.9177	0.3588	0.0115	0.005373	0.982	0.008273	0.006018	0.00662	89866	89711	155	UK Biobank
Arm fat percentage (right)	0.02501	0.02731	0.9156	0.3599	0.217	0.008061	1.09	0.021	-0.006685	0.007612	354760	NA	NA	UK Biobank
Treatment/medication code: gtn 400micrograms spray	0.106	0.1158	0.9154	0.36	0.002955	0.001437	0.9995	0.007573	-0.004779	0.005315	361141	360292	849	UK Biobank
Cardiac arrhytmias, COPD co-morbidities	0.06171	0.06748	0.9145	0.3605	0.01606	0.002148	1.009	0.01041	-0.006352	0.005465	361194	352393	8801	UK Biobank
Diagnoses - main ICD10: S09 Other and unspecified injuries of head	0.07647	0.08363	0.9144	0.3605	0.00461	0.00141	0.9901	0.006337	-0.006418	0.005253	361194	359861	1333	UK Biobank
Rheumatoid arthritis	0.1341	0.147	0.9121	0.3617	0.003079	0.00158	0.9974	0.007553	3.609e-05	0.005471	361194	359589	1605	UK Biobank
Other malignant neoplasms of skin	-0.05755	0.06325	-0.9099	0.3629	0.02638	0.004376	1.024	0.01529	0.0002359	0.006912	361194	346792	14402	UK Biobank
Other malignant neoplasms of skin	-0.05755	0.06325	-0.9099	0.3629	0.02638	0.004376	1.024	0.01529	0.0002359	0.006912	361194	346792	14402	UK Biobank
Platelet count	0.02913	0.03202	0.9097	0.363	0.2266	0.01845	1.26	0.05292	0.003633	0.008323	350474	NA	NA	UK Biobank
Granulocyte percentage of myeloid white cells	0.03713	0.04085	0.9091	0.3633	0.1571	0.0203	1.04	0.03381	0.0004625	0.007391	173485	NA	NA	UK Biobank and INTERVAL
Trunk predicted mass	0.02555	0.02815	0.9076	0.3641	0.2869	0.01393	1.18	0.03543	-0.01835	0.008166	354494	NA	NA	UK Biobank
Job SOC coding: Nurses	0.1059	0.1168	0.9065	0.3647	0.01149	0.005775	1.009	0.007012	-0.005005	0.005306	91149	86087	5062	UK Biobank
Cancer diagnosed by doctor	-0.08055	0.08916	-0.9034	0.3663	0.006404	0.001651	1.017	0.007815	0.003011	0.005759	359981	331472	28509	UK Biobank
Diagnoses - main ICD10: G47 Sleep disorders	0.07907	0.0877	0.9016	0.3673	0.006575	0.001323	0.9966	0.007437	0.006695	0.006006	361194	358471	2723	UK Biobank
Current employment status: Looking after home and/or family	0.09531	0.1058	0.9012	0.3675	0.004556	0.001413	1.007	0.00756	-0.001321	0.005949	359931	341917	18014	UK Biobank
Diagnoses - main ICD10: I42 Cardiomyopathy	0.1256	0.1396	0.9	0.3681	0.002362	0.00147	0.9942	0.007071	-0.004348	0.005633	361194	360715	479	UK Biobank
Job SOC coding: Secondary education teaching professionals	0.08076	0.09	0.8973	0.3696	0.02869	0.005515	0.9944	0.007373	-0.004109	0.005492	91149	83467	7682	UK Biobank
Job SOC coding: General office assistants/clerks	-0.1203	0.1344	-0.8952	0.3707	0.01027	0.005768	0.9984	0.007782	0.005103	0.005105	91149	87127	4022	UK Biobank
Coffee type: Decaffeinated coffee (any type)	0.05273	0.05896	0.8944	0.3711	0.01432	0.002076	1.013	0.007293	0.0004414	0.005473	283449	228139	55310	UK Biobank
Vascular/heart problems diagnosed by doctor: Angina	0.03699	0.04137	0.8941	0.3713	0.02297	0.002237	1.03	0.00922	0.0015	0.005568	360420	349048	11372	UK Biobank
Waist circumference	0.02368	0.02651	0.8933	0.3717	0.2067	0.008682	1.073	0.02115	-0.00911	0.007171	360564	NA	NA	UK Biobank
Other hammer toe(s) (acquired)	-0.1438	0.1614	-0.891	0.3729	0.001953	0.001151	0.9947	0.006691	0.008751	0.005299	361194	360356	838	UK Biobank
Job coding: secondary school teacher or teaching professional (including head teacher)	0.0822	0.09228	0.8908	0.3731	0.02726	0.005478	0.9943	0.007291	-0.003643	0.005532	89866	82310	7556	UK Biobank
Chest pain or discomfort when walking uphill or hurrying	0.08194	0.09203	0.8904	0.3733	0.04159	0.01153	1.013	0.007468	-0.005643	0.005105	44867	32929	11938	UK Biobank
Leg predicted mass (left)	0.02556	0.02885	0.8859	0.3757	0.2589	0.01236	1.133	0.02854	-0.01634	0.008109	354766	NA	NA	UK Biobank
Non-cancer illness code, self-reported: diabetes	0.03877	0.04384	0.8843	0.3765	0.0336	0.002391	1.059	0.01229	-0.01345	0.006647	361141	347027	14114	UK Biobank
Reason for glasses/contact lenses: For short-sightedness, i.e. only or mainly for distance viewing such as driving, cinema etc (called 'myopia')	-0.05045	0.05706	-0.8841	0.3767	0.02436	0.001996	1.084	0.008975	-0.004246	0.006442	360677	331359	29318	UK Biobank
Non-cancer illness code, self-reported: spine arthritis/spondylitis	0.1053	0.1199	0.8782	0.3799	0.003562	0.001462	1.003	0.007822	-6.094e-05	0.005736	361141	357987	3154	UK Biobank
Manic/hyper symptoms: I was more active than usual	-0.1622	0.1851	-0.8759	0.3811	0.02584	0.02047	1.002	0.007578	0.009006	0.005833	24049	18019	6030	UK Biobank
Trunk fat-free mass	0.02454	0.02807	0.8742	0.382	0.2886	0.014	1.181	0.03575	-0.0184	0.008162	354530	NA	NA	UK Biobank
Job SOC coding: Houseparents and residential wardens	-0.103	0.1178	-0.8737	0.3823	0.01914	0.006176	0.9922	0.007039	0.004908	0.006504	91149	90503	646	UK Biobank
Job coding: general office assistant/clerk, clerical officer, clerk-typist, office supervisor, press/newspaper corrector/reader	-0.1138	0.1304	-0.8728	0.3828	0.01115	0.005838	0.9992	0.007827	0.004453	0.005077	89866	85909	3957	UK Biobank
Types of transport used (excluding work): None of the above	-0.1146	0.1314	-0.8725	0.3829	0.003297	0.001422	1.002	0.007351	0.005809	0.005384	359324	358529	795	UK Biobank
Heel quantitative ultrasound index (QUI), direct entry (left)	-0.03259	0.03743	-0.8708	0.3839	0.2555	0.03028	1.036	0.02103	0.001128	0.006545	114630	NA	NA	UK Biobank
Heel bone mineral density (BMD) T-score, automated (left)	-0.03259	0.03743	-0.8707	0.3839	0.2555	0.03028	1.036	0.02104	0.001128	0.006545	114630	NA	NA	UK Biobank
Mental health problems ever diagnosed by a professional: Obsessive compulsive disorder (OCD)	0.114	0.131	0.87	0.3843	0.008781	0.004063	1.003	0.007498	0.001415	0.005652	117711	116978	733	UK Biobank
Treatment/medication code: garlic product	0.1172	0.1348	0.8699	0.3843	0.002717	0.001393	0.9972	0.007536	-0.004601	0.004995	361141	356272	4869	UK Biobank
Intra-ocular pressure, Goldmann-correlated (right)	-0.03481	0.04008	-0.8685	0.3851	0.1762	0.01255	1.046	0.0133	-0.001981	0.005788	76630	NA	NA	UK Biobank
Diagnoses - main ICD10: N81 Female genital prolapse	0.05172	0.05977	0.8653	0.3869	0.01342	0.001747	1.02	0.008467	-0.002253	0.005512	361194	353683	7511	UK Biobank
Immature fraction of reticulocytes	-0.03468	0.04009	-0.8649	0.3871	0.1098	0.0169	1.061	0.04902	0.002113	0.006294	173490	NA	NA	UK Biobank and INTERVAL
Job SOC coding: Researchers n.e.c.	0.1077	0.1247	0.8636	0.3878	0.01322	0.005642	0.9965	0.007484	-0.006246	0.005551	91149	90121	1028	UK Biobank
Leg fat-free mass (left)	0.02493	0.02887	0.8635	0.3879	0.2591	0.01237	1.133	0.02865	-0.01644	0.00811	354771	NA	NA	UK Biobank
Illnesses of adopted siblings: None of the above (group 2)	-0.1002	0.1165	-0.8604	0.3896	0.7639	0.2662	0.9817	0.006746	-0.0002968	0.005799	1869	292	1577	UK Biobank
Diagnoses - main ICD10: S62 Fracture at wrist and hand level	-0.1161	0.1362	-0.8528	0.3938	0.002367	0.001429	0.9971	0.00726	0.00639	0.005283	361194	359431	1763	UK Biobank
Leg fat percentage (left)	0.02433	0.02855	0.8521	0.3942	0.2304	0.007277	1.107	0.02089	-0.01431	0.007993	354791	NA	NA	UK Biobank
Reason for glasses/contact lenses: For long-sightedness, i.e. for distance and near, but particularly for near tasks like reading (called 'hypermetropia')	-0.06117	0.0718	-0.8519	0.3943	0.009086	0.001513	1.041	0.008105	0.004538	0.005559	360677	345586	15091	UK Biobank
Heel bone mineral density (BMD) (left)	-0.03186	0.0374	-0.8518	0.3943	0.2594	0.03049	1.036	0.0213	4.841e-05	0.006641	114561	NA	NA	UK Biobank
Non-cancer illness code, self-reported: cholelithiasis/gall stones	0.0641	0.07541	0.8499	0.3954	0.008167	0.001626	1.023	0.01067	-0.006222	0.005478	361141	355200	5941	UK Biobank
Red blood cell (erythrocyte) distribution width	0.02792	0.03286	0.8496	0.3956	0.1239	0.01263	1.067	0.03983	-0.001133	0.006976	350473	NA	NA	UK Biobank
Feelings of tiredness during worst episode of depression	0.08177	0.09652	0.8472	0.3969	0.03269	0.01081	1.002	0.008388	0.002961	0.005366	59774	10822	48952	UK Biobank
Mean time to correctly identify matches	0.02736	0.03237	0.8453	0.398	0.06577	0.002658	1.029	0.0101	-0.007882	0.005986	358695	NA	NA	UK Biobank
Diagnoses - main ICD10: K80 Cholelithiasis	0.05876	0.06959	0.8445	0.3984	0.01476	0.001991	1.031	0.01239	-0.005052	0.006426	361194	350674	10520	UK Biobank
Cereal type: Oat cereal (e.g. Ready Brek, porridge)	0.04451	0.05282	0.8426	0.3995	0.01979	0.001998	1.007	0.007629	0.001388	0.005834	299898	223547	76351	UK Biobank
Arm fat-free mass (left)	0.02353	0.02798	0.841	0.4004	0.2549	0.01163	1.142	0.02939	-0.01882	0.007529	354668	NA	NA	UK Biobank
Illnesses of mother: Severe depression	0.05238	0.0623	0.8407	0.4005	0.0102	0.001639	1.002	0.006763	0.01151	0.00509	330653	308649	22004	UK Biobank
Current employment status: Unable to work because of sickness or disability	0.04008	0.04772	0.8399	0.4009	0.02393	0.001727	1.014	0.007847	0.01019	0.006091	359931	346175	13756	UK Biobank
3mm regularity index (right)	0.06909	0.08241	0.8384	0.4018	0.03597	0.00779	1.001	0.00755	0.002908	0.005784	74059	NA	NA	UK Biobank
Chron's disease NAS	0.1066	0.1276	0.8358	0.4033	0.002932	0.001416	1.009	0.006997	0.007464	0.005879	361194	360430	764	UK Biobank
Gas or solid-fuel cooking/heating: None of the above	-0.07909	0.0947	-0.8351	0.4037	0.005242	0.001311	0.9973	0.006951	-0.003927	0.005534	360066	296413	63653	UK Biobank
Job SOC coding: Software professionals	-0.1201	0.144	-0.8341	0.4043	0.01175	0.005456	1.019	0.006693	0.01579	0.006501	91149	87630	3519	UK Biobank
Impedance of arm (right)	0.02455	0.02948	0.8329	0.4049	0.2214	0.008536	1.108	0.02409	0.005041	0.008986	354792	NA	NA	UK Biobank
Yogurt/ice-cream consumers	0.09092	0.1097	0.8287	0.4073	0.02822	0.01011	1.003	0.007138	7.047e-05	0.0057	51427	30624	20803	UK Biobank
Treatment/medication code: lisinopril	0.0537	0.0649	0.8275	0.4079	0.01365	0.001675	1.015	0.00921	-0.007802	0.006509	361141	351170	9971	UK Biobank
Severity of problems due to mania or irritability	0.07536	0.0911	0.8272	0.4081	0.06672	0.02011	0.991	0.00685	0.0008242	0.005434	26655	18667	7988	UK Biobank
Age when last took cannabis	-0.1093	0.1322	-0.8263	0.4086	0.04663	0.02023	0.9931	0.007836	0.004311	0.006007	25698	NA	NA	UK Biobank
Own or rent accommodation lived in: Rent - from local authority, local council, housing association	0.02999	0.03641	0.8237	0.4101	0.03634	0.00219	1.017	0.00937	-0.006286	0.005585	356340	337372	18968	UK Biobank
Haemoglobin concentration	-0.0284	0.03451	-0.8231	0.4104	0.1294	0.01018	1.234	0.04619	-0.01326	0.007639	350474	NA	NA	UK Biobank
Neutrophill count	0.03057	0.03714	0.8233	0.4104	0.1342	0.01018	1.139	0.02745	0.001093	0.007981	349856	NA	NA	UK Biobank
Stem Cell Growth Factor beta	0.5007	0.6097	0.8213	0.4115	0.02784	0.05495	1.009	0.007682	-0.007632	0.00506	8293	NA	NA	Young Finns Study (YFS)
Ever stopped smoking for 6+ months	0.07365	0.08981	0.8201	0.4122	0.02434	0.00545	0.996	0.007117	0.005146	0.0053	87937	50034	37903	UK Biobank
Asthma-related pneumonia	0.1128	0.1383	0.8158	0.4146	0.00233	0.001331	1.006	0.007003	0.003926	0.005476	361194	355294	5900	UK Biobank
Pneumonias (Asthma/COPD co-morbidities)	0.1128	0.1383	0.8158	0.4146	0.00233	0.001331	1.006	0.007003	0.003926	0.005476	361194	355294	5900	UK Biobank
Intra-ocular pressure, corneal-compensated (left)	-0.03882	0.04778	-0.8126	0.4165	0.1138	0.01048	1.022	0.01014	0.002823	0.006362	76510	NA	NA	UK Biobank
High-density lipoprotein (HDL)	0.03519	0.04334	0.8119	0.4168	0.06814	0.01911	0.9656	0.07662	-0.01228	0.005803	188577	NA	NA	GLGC
Age at last episode of depression	0.07648	0.09428	0.8112	0.4173	0.03189	0.008118	1.004	0.007445	0.003133	0.005133	59260	NA	NA	UK Biobank
Non-butter spread type details: Polyunsaturated/sunflower oil based spread (eg: Flora)	0.08618	0.1065	0.8094	0.4183	0.007156	0.002713	0.9982	0.00725	-0.005616	0.005804	190094	125769	64325	UK Biobank
Type of accommodation lived in: A flat, maisonette or apartment	0.04764	0.05901	0.8073	0.4195	0.01236	0.001632	1.02	0.007369	-0.004601	0.005317	360088	328237	31851	UK Biobank
Illnesses of mother: Heart disease	0.04932	0.06114	0.8067	0.4199	0.01416	0.001981	1.015	0.008205	0.003653	0.005677	332966	266623	66343	UK Biobank
Barret oesophagus	0.07305	0.0908	0.8045	0.4211	0.00609	0.001621	0.992	0.007802	-0.002486	0.006064	361194	359403	1791	UK Biobank
Treatment/medication code: reductil 10mg capsule	0.1088	0.1355	0.8028	0.4221	0.003329	0.001483	0.988	0.009216	-0.007546	0.006894	361141	361025	116	UK Biobank
Reason for reducing amount of alcohol drunk: Other reason	-0.04841	0.06035	-0.8021	0.4225	0.03879	0.004448	1.012	0.007766	0.007054	0.005584	134033	63424	70609	UK Biobank
Malignant neoplasm of bronchus and lung	0.0698	0.0874	0.7986	0.4245	0.005291	0.001321	0.9924	0.006804	-0.001935	0.005517	361194	359513	1681	UK Biobank
Malignant neoplasm of bronchus and lung	0.0698	0.0874	0.7986	0.4245	0.005291	0.001321	0.9924	0.006804	-0.001935	0.005517	361194	359513	1681	UK Biobank
Diagnoses - main ICD10: K50 Crohn's disease [regional enteritis]	0.07502	0.09403	0.7979	0.4249	0.004885	0.001416	1.002	0.007088	0.006903	0.005235	361194	360226	968	UK Biobank
Diagnoses - main ICD10: K76 Other diseases of liver	-0.09568	0.12	-0.7972	0.4254	0.003179	0.001403	0.9987	0.007515	-0.004998	0.005623	361194	360618	576	UK Biobank
Diagnoses - main ICD10: R35 Polyuria	0.1322	0.1664	0.7945	0.4269	0.002335	0.00164	1.005	0.008017	0.001345	0.006091	361194	359421	1773	UK Biobank
Treatment/medication code: bendroflumethiazide	-0.03963	0.04998	-0.793	0.4278	0.02914	0.002509	1.032	0.009952	-0.0009943	0.006229	361141	340945	20196	UK Biobank
Treatment/medication code: ipratropium	0.08719	0.11	0.7926	0.428	0.003538	0.001428	0.9841	0.007227	0.004759	0.005518	361141	360665	476	UK Biobank
6mm asymmetry angle (right)	-0.04782	0.06048	-0.7906	0.4292	0.12	0.01271	1.004	0.007363	0.002548	0.005615	41390	NA	NA	UK Biobank
Age started oral contraceptive pill	-0.04055	0.05132	-0.7902	0.4294	0.04914	0.004448	1.005	0.00838	0.002896	0.005635	154112	NA	NA	UK Biobank
Unsepcified/other endometriosis	0.09809	0.1241	0.7901	0.4294	0.002595	0.001372	0.9957	0.007794	0.0007784	0.005331	361194	360760	434	UK Biobank
Diagnoses - main ICD10: F10 Mental and behavioural disorders due to use of alcohol	0.08184	0.1043	0.7846	0.4327	0.004438	0.00146	0.9984	0.007631	-0.005262	0.005483	361194	360408	786	UK Biobank
Job coding: chemist (analytic, developmental, industrial, research)	0.0723	0.09221	0.7841	0.433	0.0155	0.005523	0.9954	0.007125	-0.0009481	0.005066	89866	88805	1061	UK Biobank
Illnesses of father: Diabetes	0.04605	0.05876	0.7837	0.4332	0.01658	0.002139	1.031	0.008595	-0.0001223	0.005998	313294	283284	30010	UK Biobank
Pain type(s) experienced in last month: Pain all over the body	0.05192	0.06648	0.7809	0.4349	0.0112	0.001605	0.9967	0.007677	0.005241	0.005104	360391	354861	5530	UK Biobank
Whole body fat-free mass	0.02198	0.02823	0.7786	0.4362	0.288	0.01377	1.171	0.03398	-0.01792	0.008152	354808	NA	NA	UK Biobank
Job coding: houseparent, child careworker, residential warden, sheltered accommodation warden, foster parent	-0.08968	0.1152	-0.7783	0.4364	0.01979	0.006183	0.9921	0.006955	0.004635	0.00649	89866	89233	633	UK Biobank
Treatment/medication code: simvastatin	-0.03652	0.04696	-0.7777	0.4368	0.02755	0.003629	1.043	0.02259	-0.0008979	0.006191	361141	320220	40921	UK Biobank
DVT of lower extremities and pulmonary embolism	0.05217	0.06725	0.7758	0.4379	0.01087	0.002108	1.009	0.01103	0.002399	0.005472	361194	356875	4319	UK Biobank
Whole body water mass	0.02187	0.02821	0.7754	0.4381	0.2873	0.01366	1.171	0.03367	-0.01761	0.008168	354834	NA	NA	UK Biobank
Forced vital capacity (FVC)	-0.02272	0.0293	-0.7753	0.4382	0.1822	0.008026	1.129	0.01958	-0.01428	0.007394	329404	NA	NA	UK Biobank
Impedance of leg (right)	0.02246	0.02897	0.7753	0.4382	0.2334	0.01048	1.128	0.02417	-0.004695	0.008805	354817	NA	NA	UK Biobank
Ever smoked	-0.04563	0.05889	-0.7749	0.4384	0.07713	0.007093	0.9998	0.006676	0.01049	0.006033	74053	37000	37000	Tobacco and Genetics Consortium
Other soft tissue disorders, not elsewhere classified	0.07003	0.09045	0.7743	0.4388	0.00503	0.001585	1.008	0.007826	9.389e-06	0.005505	361194	353961	7233	UK Biobank
Diagnoses - main ICD10: M79 Other soft tissue disorders, not elsewhere classified	0.07003	0.09045	0.7743	0.4388	0.00503	0.001585	1.008	0.007826	9.389e-06	0.005505	361194	354248	6946	UK Biobank
Skin changes due to chronic exposure to nonionizing radiation	0.08654	0.1126	0.7685	0.4422	0.004117	0.00173	0.9955	0.008068	-0.001704	0.005762	361194	359693	1501	UK Biobank
Diagnoses - main ICD10: L57 Skin changes due to chronic exposure to nonionising radiation	0.08654	0.1126	0.7685	0.4422	0.004117	0.00173	0.9955	0.008068	-0.001704	0.005762	361194	359747	1447	UK Biobank
Non-cancer illness code, self-reported: sciatica	0.1174	0.1529	0.7681	0.4424	0.001988	0.001375	1.008	0.00784	0.003937	0.006086	361141	357741	3400	UK Biobank
Reason for reducing amount of alcohol drunk: Health precaution	0.03693	0.04814	0.7671	0.443	0.04583	0.004667	1.001	0.007783	-0.007026	0.005182	134033	90165	43868	UK Biobank
Actinic keratosis	0.09529	0.1243	0.7665	0.4434	0.00381	0.001618	0.9976	0.007727	-0.002016	0.005948	361194	359845	1349	UK Biobank
Medication for pain relief, constipation, heartburn: Ranitidine (e.g. Zantac)	0.07963	0.104	0.7656	0.4439	0.005102	0.001384	1.002	0.00729	0.001311	0.005073	357084	350258	6826	UK Biobank
Treatment/medication code: oxybutynin	0.1195	0.1565	0.7636	0.4451	0.002121	0.001441	0.9948	0.006958	-0.002437	0.005446	361141	360314	827	UK Biobank
Diagnoses - main ICD10: C34 Malignant neoplasm of bronchus and lung	-0.09692	0.1269	-0.7635	0.4452	0.002607	0.001278	1.003	0.006798	0.0003775	0.005935	361194	359767	1427	UK Biobank
Workplace very cold: Rarely/never	-0.05224	0.06868	-0.7607	0.4468	0.03777	0.006022	0.9993	0.007555	0.01244	0.006061	90696	13643	77053	UK Biobank
Coxarthrosis [arthrosis of hip](FG)	-0.04257	0.05602	-0.7598	0.4473	0.01798	0.002324	1.022	0.009815	0.007113	0.005345	361194	351784	9410	UK Biobank
Diagnoses - main ICD10: M16 Coxarthrosis [arthrosis of hip]	-0.04257	0.05602	-0.7598	0.4473	0.01798	0.002324	1.022	0.009815	0.007113	0.005345	361194	352058	9136	UK Biobank
Monocyte percentage	-0.03022	0.03981	-0.759	0.4479	0.09462	0.01326	1.174	0.04346	0.01202	0.00775	349861	NA	NA	UK Biobank
Type of accommodation lived in: A house or bungalow	-0.04149	0.05478	-0.7574	0.4488	0.0136	0.001703	1.019	0.007811	0.005202	0.005402	360088	33234	326854	UK Biobank
Treatment/medication code: warfarin	-0.06976	0.09213	-0.7572	0.4489	0.005021	0.001407	1.012	0.007867	0.0008264	0.005309	361141	357490	3651	UK Biobank
Microalbumin in urine	-0.08294	0.1098	-0.7554	0.45	0.01236	0.004633	0.998	0.007307	0.004932	0.005567	108706	NA	NA	UK Biobank
Treatment/medication code: amlodipine	-0.04301	0.05701	-0.7545	0.4506	0.02163	0.002064	1.019	0.008232	-0.001555	0.005575	361141	346553	14588	UK Biobank
Ankle spacing width	-0.02253	0.02986	-0.7544	0.4506	0.2878	0.0164	1.12	0.02523	-0.00751	0.007541	206589	NA	NA	UK Biobank
Height	0.02204	0.02929	0.7525	0.4517	0.3421	0.01629	1.175	0.03068	-0.01962	0.008734	253288	NA	NA	GIANT Consortium
Fractured bone site(s): Ankle	0.07485	0.09944	0.7527	0.4517	0.005568	0.001425	0.9958	0.007623	0.0007207	0.005714	359241	354173	5068	UK Biobank
Mineral and other dietary supplements: Selenium	0.05709	0.07616	0.7496	0.4535	0.007535	0.001471	0.9943	0.007519	0.01333	0.005178	360016	351498	8518	UK Biobank
Diagnoses - main ICD10: H25 Senile cataract	0.06861	0.09223	0.7439	0.4569	0.00743	0.001713	1.01	0.008123	0.000673	0.005925	361194	354862	6332	UK Biobank
Which eye(s) affected by myopia (short sight): Right eye	0.07747	0.1042	0.7433	0.4573	0.05269	0.01517	0.9876	0.006463	0.001841	0.005656	29317	27710	1607	UK Biobank
Starch	0.07847	0.1059	0.7409	0.4588	0.02805	0.01018	1.008	0.007099	-0.001864	0.005609	51453	NA	NA	UK Biobank
Non-cancer illness code, self-reported: urinary tract infection/kidney infection	0.07236	0.09783	0.7396	0.4595	0.00478	0.001393	0.983	0.007067	0.004499	0.005481	361141	359443	1698	UK Biobank
Types of physical activity in last 4 weeks: None of the above	0.0333	0.04502	0.7395	0.4596	0.02295	0.001763	1.02	0.00779	0.004292	0.005532	359263	338008	21255	UK Biobank
Diagnoses - main ICD10: S82 Fracture of lower leg, including ankle	0.09233	0.125	0.7389	0.46	0.002751	0.001488	1.006	0.007298	-0.001241	0.005123	361194	356637	4557	UK Biobank
White blood cell (leukocyte) count	0.02963	0.04017	0.7378	0.4607	0.1266	0.0114	1.112	0.02819	-0.002736	0.008065	350470	NA	NA	UK Biobank
Reproduciblity of spirometry measurement using ERS/ATS criteria	0.05206	0.0706	0.7374	0.4608	0.01442	0.002127	1.001	0.007155	-0.004779	0.005971	272338	59808	212530	UK Biobank
Particulate matter air pollution (pm10); 2007	-0.04285	0.05839	-0.7339	0.463	0.01941	0.002258	1.153	0.009013	0.002702	0.005919	355245	NA	NA	UK Biobank
Treatment/medication code: bisoprolol	-0.05901	0.08119	-0.7268	0.4673	0.006082	0.001404	0.9972	0.007021	-0.004367	0.005454	361141	355837	5304	UK Biobank
Diagnoses - main ICD10: I84 Haemorrhoids	0.04708	0.06478	0.7267	0.4674	0.01051	0.001725	1.012	0.008099	0.006455	0.005125	361194	349092	12102	UK Biobank
FI4 : positional arithmetic	0.03578	0.04926	0.7264	0.4676	0.06864	0.005879	1.007	0.008094	0.007319	0.005668	115690	17346	98344	UK Biobank
Diagnoses - main ICD10: M72 Fibroblastic disorders	0.05268	0.07291	0.7225	0.47	0.0121	0.004397	1.048	0.03104	-0.007677	0.006188	361194	358001	3193	UK Biobank
Fracture resulting from simple fall	-0.06206	0.08592	-0.7223	0.4701	0.04848	0.01475	0.9907	0.007664	-0.002831	0.00543	34310	13926	20384	UK Biobank
Treatment/medication code: rosuvastatin	0.09526	0.1321	0.7213	0.4708	0.002909	0.001397	1.008	0.007356	-0.01129	0.005859	361141	358914	2227	UK Biobank
Diagnoses - main ICD10: L72 Follicular cysts of skin and subcutaneous tissue	-0.08007	0.1119	-0.7158	0.4741	0.005122	0.002013	1.005	0.008393	0.0002431	0.006083	361194	354550	6644	UK Biobank
Diagnoses - main ICD10: D25 Leiomyoma of uterus	0.07952	0.1112	0.7151	0.4745	0.003901	0.001452	1.006	0.007283	0.003571	0.005269	361194	355687	5507	UK Biobank
Started insulin within one year diagnosis of diabetes	-0.07344	0.1029	-0.7139	0.4753	0.1138	0.04302	1.009	0.008739	0.007884	0.006267	16415	14416	1999	UK Biobank
Professional informed about depression	0.05296	0.07442	0.7117	0.4767	0.04424	0.009384	1.007	0.008658	0.004439	0.005834	66302	23574	42728	UK Biobank
Arm predicted mass (left)	0.01998	0.02809	0.7114	0.4768	0.2552	0.01167	1.145	0.02953	-0.01816	0.007777	354653	NA	NA	UK Biobank
Tobacco smoking: Ex-smoker	0.03449	0.04862	0.7094	0.4781	0.07629	0.008353	1.012	0.008524	-0.001109	0.005343	91353	58018	33335	UK Biobank
Age deep-vein thrombosis (DVT, blood clot in leg) diagnosed	0.1273	0.1796	0.7091	0.4783	0.0741	0.06735	0.9941	0.00681	0.001329	0.005237	6795	NA	NA	UK Biobank
Alcohol drinker status: Current	-0.03487	0.04944	-0.7053	0.4806	0.02	0.002006	1.029	0.00823	-0.003632	0.005537	360726	23807	336919	UK Biobank
Diagnoses - main ICD10: S66 Injury of muscle and tendon at wrist and hand level	-0.135	0.1915	-0.705	0.4808	0.001174	0.00128	1.003	0.006758	0.002496	0.005615	361194	360405	789	UK Biobank
Milk added to cereal	0.08952	0.1273	0.7034	0.4818	0.0173	0.008502	1.016	0.006776	0.001821	0.005063	51427	28917	22510	UK Biobank
Treatment/medication code: amitriptyline	0.06392	0.09099	0.7025	0.4824	0.006692	0.001497	1.013	0.007453	0.001777	0.006217	361141	354317	6824	UK Biobank
Vascular/heart problems diagnosed by doctor: High blood pressure	0.02227	0.03171	0.7022	0.4825	0.1223	0.005649	1.083	0.01865	-0.007868	0.007292	360420	263281	97139	UK Biobank
Arm fat percentage (left)	0.0188	0.02685	0.6999	0.484	0.2214	0.008169	1.088	0.0214	-0.005446	0.007661	354707	NA	NA	UK Biobank
Own or rent accommodation lived in: Pay part rent and part mortgage (shared ownership)	0.07194	0.1042	0.6906	0.4898	0.004099	0.001374	0.987	0.00727	-0.003557	0.005474	356340	355421	919	UK Biobank
Workplace had a lot of diesel exhaust: Sometimes	0.06037	0.08758	0.6894	0.4906	0.02639	0.006952	1.008	0.007712	-0.00289	0.005688	89310	76272	13038	UK Biobank
Particulate matter air pollution 2.5-10um; 2010	-0.1308	0.1901	-0.6884	0.4912	0.00193	0.001554	0.9993	0.007239	0.0001582	0.00553	329886	NA	NA	UK Biobank
Diagnoses - main ICD10: M67 Other disorders of synovium and tendon	-0.07899	0.1148	-0.6879	0.4915	0.003606	0.001439	0.996	0.007658	0.009126	0.005477	361194	358581	2613	UK Biobank
Psoriasis	0.07082	0.1031	0.6872	0.4919	0.004249	0.001419	0.9927	0.007782	0.00769	0.005593	361194	360707	487	UK Biobank
Diagnoses - main ICD10: L40 Psoriasis	0.07082	0.1031	0.6872	0.4919	0.004249	0.001419	0.9927	0.007782	0.00769	0.005593	361194	360720	474	UK Biobank
Job SOC coding: Biological scientists and biochemists	0.06823	0.09935	0.6868	0.4922	0.01731	0.006433	0.9863	0.0084	0.0001459	0.005249	91149	90082	1067	UK Biobank
Home area population density - urban or rural: England/Wales - Hamlet and Isolated Dwelling - less sparse	-0.06994	0.1019	-0.6862	0.4926	0.00405	0.001423	0.9922	0.00716	0.003432	0.005136	357712	349758	7954	UK Biobank
Corneal hysteresis (left)	0.03667	0.05349	0.6855	0.493	0.1057	0.01107	1.03	0.01076	-0.002735	0.006428	76510	NA	NA	UK Biobank
Invitation to complete online 24-hour recall dietary questionnaire, acceptance	-0.03588	0.05246	-0.684	0.494	0.03523	0.003018	1.022	0.008136	0.01966	0.005586	218234	70065	148169	UK Biobank
Sleep apnoea	0.06829	0.1001	0.6824	0.495	0.004981	0.001375	1.002	0.007164	0.006441	0.006099	361194	358945	2249	UK Biobank
Non-cancer illness code, self-reported: psoriasis	0.0875	0.1288	0.6795	0.4968	0.006044	0.001748	1.025	0.01044	0.02182	0.006293	361141	356949	4192	UK Biobank
Snoring	-0.02412	0.03555	-0.6786	0.4974	0.05956	0.003034	1.032	0.01052	-0.007505	0.00607	336320	210664	125656	UK Biobank
Treatment/medication code: metformin	0.03029	0.04484	0.6755	0.4993	0.02831	0.002057	1.042	0.01089	-0.008627	0.005977	361141	352173	8968	UK Biobank
Depression possibly related to stressful or traumatic event	-0.0724	0.1073	-0.6749	0.4997	0.02323	0.008391	1.009	0.007772	0.003197	0.005854	66334	17844	48490	UK Biobank
Pain type(s) experienced in last month: Facial pain	0.05238	0.07776	0.6736	0.5006	0.007587	0.001401	0.993	0.006876	0.006709	0.006047	360391	353792	6599	UK Biobank
Consecutive night shifts during mixed shift periods	0.1174	0.1744	0.6734	0.5007	0.02644	0.02214	0.9982	0.007494	-0.009739	0.005315	19344	NA	NA	UK Biobank
Non-cancer illness code, self-reported: heart arrhythmia	-0.1906	0.2837	-0.6721	0.5015	0.04221	0.06165	1.004	0.007195	0.008172	0.005391	361141	359128	2013	UK Biobank
Ever heard an un-real voice	-0.06441	0.09594	-0.6714	0.502	0.01219	0.004273	0.9892	0.007098	0.005615	0.005281	117503	115494	2009	UK Biobank
Bone mineral density	0.02057	0.03069	0.6704	0.5026	0.3915	0.0325	1.353	0.0832	-0.01596	0.01057	426824	NA	NA	GEFOS
Leisure/social activities: Adult education class	0.0306	0.04575	0.6689	0.5035	0.01948	0.00171	0.9856	0.007331	0.011	0.005219	360063	334221	25842	UK Biobank
Non-cancer illness code, self-reported: iron deficiency anaemia	0.08036	0.1208	0.6652	0.5059	0.003239	0.001394	0.9955	0.007259	0.006562	0.005257	361141	359153	1988	UK Biobank
Own or rent accommodation lived in: Own outright (by you or someone in your household)	-0.028	0.0422	-0.6633	0.5071	0.03325	0.002143	1.012	0.008808	-0.001537	0.005748	356340	162982	193358	UK Biobank
Job coding: residential manager, day care manager, nursing home manager, retirement home manager, convalescent home manager	0.07365	0.1111	0.6632	0.5072	0.01267	0.005444	0.992	0.007751	-0.002898	0.005701	89866	89548	318	UK Biobank
Hypertensive diseases	0.07607	0.115	0.6615	0.5083	0.0042	0.001439	0.9877	0.006416	-0.005455	0.005734	361194	359881	1313	UK Biobank
Arm predicted mass (right)	0.01853	0.02808	0.6599	0.5093	0.2567	0.01168	1.147	0.02978	-0.01969	0.007833	354726	NA	NA	UK Biobank
Hair colour (natural, before greying): Dark brown	0.02265	0.03449	0.6566	0.5114	0.09421	0.02226	1.082	0.06568	-0.008258	0.006952	360270	225643	134627	UK Biobank
Diagnoses - main ICD10: C43 Malignant melanoma of skin	-0.07974	0.1219	-0.6541	0.5131	0.002991	0.001768	1.004	0.008213	-0.003503	0.005324	361194	359522	1672	UK Biobank
Manifestations of mania or irritability: I was more creative or had more ideas than usual	0.06397	0.09787	0.6536	0.5134	0.01402	0.004708	1.01	0.007857	0.003475	0.005687	114422	111332	3090	UK Biobank
Treatment/medication code: insulin product	-0.06362	0.09792	-0.6497	0.5159	0.007675	0.001811	1.015	0.008632	0.00227	0.006292	361141	357596	3545	UK Biobank
Leg pain in calf/calves	0.07726	0.1197	0.6454	0.5186	0.04032	0.02052	1.006	0.007456	-0.005505	0.006109	25567	17105	8462	UK Biobank
Never eat eggs, dairy, wheat, sugar: Sugar or foods/drinks containing sugar	-0.02333	0.0363	-0.6427	0.5204	0.04685	0.002484	1.017	0.009813	-0.00767	0.005772	359777	292485	67292	UK Biobank
Fibroblastic disorders	0.04571	0.07112	0.6427	0.5204	0.0125	0.004408	1.046	0.03096	-0.007148	0.006179	361194	358004	3190	UK Biobank
Treatment/medication code: omega-3/fish oil supplement	0.0793	0.1235	0.642	0.5209	0.002848	0.001343	1.009	0.007106	0.002913	0.005408	361141	347452	13689	UK Biobank
Never eat eggs, dairy, wheat, sugar: Eggs or foods containing eggs	-0.05213	0.08148	-0.6398	0.5223	0.007501	0.001441	1.001	0.007609	0.01005	0.00539	359777	350462	9315	UK Biobank
Diagnoses - main ICD10: N47 Redundant prepuce, phimosis and paraphimosis	0.07637	0.1197	0.6378	0.5236	0.002788	0.001507	0.9949	0.007562	0.003069	0.005654	361194	359651	1543	UK Biobank
Ever had period of mania / excitability	0.05232	0.08218	0.6366	0.5244	0.01878	0.005513	1.003	0.008714	0.007107	0.005871	115338	110522	4816	UK Biobank
Leg fat-free mass (right)	0.01839	0.02894	0.6352	0.5253	0.259	0.0124	1.145	0.02925	-0.01436	0.008066	354798	NA	NA	UK Biobank
Diagnoses - main ICD10: I35 Nonrheumatic aortic valve disorders	0.07778	0.1228	0.6336	0.5264	0.002693	0.001368	1.007	0.007381	0.005821	0.005666	361194	360293	901	UK Biobank
Treatment/medication code: terbinafine	0.09227	0.1464	0.6302	0.5286	0.001997	0.001429	0.9962	0.007304	0.003597	0.00503	361141	360441	700	UK Biobank
Intracranial volume (ICV)	0.0568	0.0904	0.6282	0.5298	0.1565	0.04117	1.001	0.007723	-0.001838	0.005613	30717	NA	NA	ENIGMA
Workplace very hot: Often	0.04868	0.07769	0.6265	0.531	0.02922	0.005797	0.9951	0.007088	0.002153	0.005365	90165	79996	10169	UK Biobank
Diagnoses - main ICD10: N60 Benign mammary dysplasia	0.1022	0.1637	0.6246	0.5323	0.001732	0.00133	0.9976	0.007152	-0.006911	0.005592	361194	360037	1157	UK Biobank
Non-butter spread type details: Olive oil based spread (eg: Bertolli)	0.04248	0.06815	0.6233	0.5331	0.01713	0.002924	0.9954	0.007259	0.002055	0.005115	190094	143064	47030	UK Biobank
Vitamin and mineral supplements: Vitamin C	0.04138	0.06678	0.6197	0.5355	0.01377	0.001593	0.9909	0.007531	0.001352	0.006204	359245	328295	30950	UK Biobank
Type milk consumed: semiskimmed	-0.06955	0.1123	-0.6192	0.5358	0.02237	0.009547	0.9932	0.006721	-0.008847	0.005136	51427	19497	31930	UK Biobank
Breastfed as a baby	-0.03417	0.05551	-0.6156	0.5381	0.02273	0.002253	1.019	0.008156	0.0008488	0.00582	273743	79905	193838	UK Biobank
Leg predicted mass (right)	0.01776	0.02895	0.6135	0.5396	0.2592	0.01241	1.145	0.02924	-0.01405	0.008103	354798	NA	NA	UK Biobank
Basic Nerve Growth Factor	-0.1082	0.1773	-0.6103	0.5417	0.08812	0.05884	0.9957	0.007897	-0.0007206	0.006163	8293	NA	NA	Young Finns Study (YFS)
Non-cancer illness code, self-reported: hypothyroidism/myxoedema	0.0309	0.05064	0.6103	0.5417	0.04808	0.005848	1.049	0.01747	-0.00498	0.007314	361141	343567	17574	UK Biobank
Illnesses of father: Lung cancer	0.04206	0.06899	0.6096	0.5421	0.01392	0.001878	0.9906	0.008252	-0.01148	0.005871	314072	284866	29206	UK Biobank
Types of physical activity in last 4 weeks: Light DIY (eg: pruning, watering the lawn)	0.02264	0.03728	0.6074	0.5436	0.03838	0.002261	1.004	0.009321	0.01267	0.00594	359263	172584	186679	UK Biobank
Diagnoses - main ICD10: M65 Synovitis and tenosynovitis	0.05867	0.0967	0.6067	0.544	0.004539	0.001479	1.003	0.007122	0.003995	0.004879	361194	358382	2812	UK Biobank
Reason for glasses/contact lenses: For a 'lazy' eye or an eye with poor vision since childhood (called 'amblyopia')	0.08624	0.1421	0.6068	0.544	0.002599	0.001322	1.018	0.006908	-0.004892	0.005548	360677	357713	2964	UK Biobank
Systolic blood pressure, automated reading	-0.01568	0.02587	-0.6063	0.5443	0.1425	0.006384	1.077	0.01798	-0.01128	0.006543	340159	NA	NA	UK Biobank
Methods of self-harm used: Ingesting a medication in excess of the normal dose	0.0586	0.09681	0.6053	0.545	0.01413	0.00388	1.02	0.006904	0.006699	0.005173	117733	114796	2937	UK Biobank
Diagnoses - main ICD10: K52 Other non-infective gastro-enteritis and colitis	0.05032	0.08328	0.6042	0.5457	0.006914	0.001509	0.9943	0.006909	0.009702	0.005486	361194	352437	8757	UK Biobank
Vitamin and mineral supplements: Vitamin A	0.06661	0.1104	0.6034	0.5463	0.00352	0.001564	1.005	0.007498	0.008442	0.005358	359245	352510	6735	UK Biobank
Red blood cell (erythrocyte) count	-0.01834	0.0305	-0.6013	0.5477	0.1846	0.01583	1.262	0.0522	-0.009771	0.008378	350475	NA	NA	UK Biobank
Illness, injury, bereavement, stress in last 2 years: Serious illness, injury or assault to yourself	0.03478	0.05788	0.6009	0.5479	0.0149	0.001616	1.009	0.007539	0.01021	0.005456	358836	325595	33241	UK Biobank
Age started smoking in current smokers	-0.05815	0.09713	-0.5987	0.5494	0.06307	0.018	0.9986	0.007601	-0.00324	0.005804	27291	NA	NA	UK Biobank
Arm fat-free mass (right)	0.0169	0.02828	0.5976	0.5501	0.2576	0.01168	1.145	0.02982	-0.01894	0.007932	354732	NA	NA	UK Biobank
Neutrophil percentage of white cells	0.0253	0.04237	0.5972	0.5504	0.1408	0.01302	0.9626	0.01891	0.002935	0.006702	173507	NA	NA	UK Biobank and INTERVAL
Putamen volume	-0.04221	0.0712	-0.5929	0.5533	0.2843	0.0483	0.9548	0.007948	-0.0006522	0.005574	30723	NA	NA	ENIGMA
Treatment/medication code: imigran 50mg tablet	0.06191	0.1048	0.5908	0.5547	0.004409	0.001434	0.995	0.007521	0.00353	0.005741	361141	360551	590	UK Biobank
Job coding: nurse (of any kind, at any level)	0.06471	0.1096	0.5903	0.555	0.01283	0.005692	1.006	0.006834	-0.002899	0.005302	89866	85006	4860	UK Biobank
Diagnoses - main ICD10: D12 Benign neoplasm of colon, rectum, anus and anal canal	0.03446	0.05846	0.5894	0.5556	0.01142	0.00169	1.014	0.007582	0.007754	0.005293	361194	352317	8877	UK Biobank
Death due to cardiac causes	-0.0623	0.1059	-0.5882	0.5564	0.004151	0.001479	0.9903	0.006724	0.003068	0.005316	361194	359597	1597	UK Biobank
Vascular/heart problems diagnosed by doctor: None of the above	-0.01825	0.03133	-0.5826	0.5601	0.1222	0.005411	1.079	0.01768	0.006724	0.007172	360420	106855	253565	UK Biobank
Treatment/medication code: colchicine	0.09018	0.155	0.5818	0.5607	0.002336	0.001585	0.9967	0.008332	-0.001733	0.006746	361141	360951	190	UK Biobank
Target heart rate achieved	0.05703	0.09814	0.5811	0.5612	0.03417	0.009975	1.008	0.007406	-0.006066	0.005364	53998	48444	5554	UK Biobank
QRS duration	0.07133	0.1232	0.5791	0.5625	0.1363	0.065	1	0.008736	-0.002955	0.006243	10815	NA	NA	UK Biobank
Diagnoses - main ICD10: D23 Other benign neoplasms of skin	0.07831	0.1352	0.579	0.5626	0.003082	0.001463	0.9897	0.007862	0.001062	0.005557	361194	358109	3085	UK Biobank
Neutrophil count	0.02273	0.03932	0.5781	0.5632	0.164	0.02101	0.9581	0.02372	0.007087	0.006821	173505	NA	NA	UK Biobank and INTERVAL
Spread type: Never/rarely use spread	-0.02608	0.04526	-0.5762	0.5645	0.02192	0.001877	1.007	0.007763	0.01093	0.005171	360291	323712	36579	UK Biobank
Manifestations of mania or irritability: I was more restless than usual	0.04178	0.07278	0.574	0.566	0.03375	0.004926	0.9991	0.007887	0.0002739	0.005549	114422	101546	12876	UK Biobank
Workplace had a lot of cigarette smoke from other people smoking: Sometimes	0.06429	0.1121	0.5735	0.5663	0.01607	0.005939	1.009	0.007671	0.006738	0.00592	90168	45115	45053	UK Biobank
Years of cough on most days	0.105	0.1834	0.5726	0.5669	0.03585	0.03837	0.998	0.007135	0.01847	0.005272	12593	NA	NA	UK Biobank
Non-cancer illness code, self-reported: heart valve problem/heart murmur	0.09286	0.1629	0.5699	0.5687	0.06459	0.04665	0.9952	0.006808	0.0008162	0.005241	361141	358688	2453	UK Biobank
Eye problems/disorders: Diabetes related eye disease	-0.04402	0.07725	-0.5699	0.5688	0.01787	0.004278	1.013	0.006675	-0.0054	0.00545	117890	115641	2249	UK Biobank
Pulse wave Arterial Stiffness index	0.04892	0.08604	0.5686	0.5696	0.02159	0.004459	1.013	0.007568	-0.002369	0.00593	118469	NA	NA	UK Biobank
IL2ra	-0.4175	0.7352	-0.5678	0.5701	0.01849	0.05369	1.004	0.008094	0.007122	0.005436	8293	NA	NA	Young Finns Study (YFS)
Diagnoses - main ICD10: F31 Bipolar affective disorder	-0.0484	0.08534	-0.5671	0.5706	0.006903	0.001588	0.9843	0.007971	0.006508	0.006112	361194	360823	371	UK Biobank
Non-cancer illness code, self-reported: hypertension	0.01823	0.03226	0.5649	0.5721	0.1207	0.005556	1.078	0.01864	-0.007622	0.007324	361141	267581	93560	UK Biobank
Time to complete round	0.01855	0.033	0.5622	0.574	0.06125	0.00271	1.031	0.01093	-0.005797	0.006263	354739	NA	NA	UK Biobank
Tobacco smoking: Never smoked	-0.02535	0.04538	-0.5588	0.5763	0.09439	0.009022	1.015	0.00903	0.001261	0.005451	91353	36833	54520	UK Biobank
Job coding: mathematician	0.08306	0.1487	0.5588	0.5763	0.01052	0.005521	0.9903	0.008803	-0.006506	0.006044	89866	89722	144	UK Biobank
Non-cancer illness code, self-reported: helicobacter pylori	-0.06087	0.1094	-0.5565	0.5779	0.003751	0.001344	0.9877	0.006884	0.007855	0.005253	361141	360136	1005	UK Biobank
Other and unspecified glaucoma	0.08703	0.157	0.5545	0.5792	0.002052	0.001343	1.003	0.007069	-0.0006494	0.005601	361194	360621	573	UK Biobank
Birth weight	-0.02162	0.03913	-0.5525	0.5806	0.09489	0.006037	1.055	0.01389	0.0028	0.006448	205475	NA	NA	UK Biobank
Bilateral oophorectomy (both ovaries removed)	-0.0362	0.06569	-0.5511	0.5815	0.02135	0.003219	1.016	0.008116	-0.0008114	0.005409	191515	175886	15629	UK Biobank
Diagnoses - main ICD10: E04 Other non-toxic goitre	0.05275	0.09631	0.5478	0.5838	0.005905	0.001764	1.004	0.007198	-0.001416	0.005754	361194	360142	1052	UK Biobank
Victim of sexual assault	0.03396	0.06232	0.5449	0.5858	0.04018	0.005325	0.9958	0.007998	0.007669	0.005324	116671	99441	17230	UK Biobank
Immature reticulocyte fraction	0.01709	0.03138	0.5447	0.5859	0.1089	0.0129	1.222	0.07292	-0.00716	0.007241	344728	NA	NA	UK Biobank
Particulate matter air pollution (pm2.5); 2010	-0.03549	0.06533	-0.5433	0.5869	0.01291	0.001685	1.033	0.007563	-0.004681	0.005536	329886	NA	NA	UK Biobank
Pain type(s) experienced in last month: Knee pain	0.0214	0.03947	0.5423	0.5876	0.04057	0.002293	1.012	0.009417	0.004319	0.005874	360391	283763	76628	UK Biobank
Macrophage migration Inhibitory Factor (MIF)	0.08909	0.1643	0.5423	0.5876	0.07381	0.05494	0.9994	0.007715	0.005389	0.005962	8293	NA	NA	Young Finns Study (YFS)
Corneal resistance factor (right)	-0.02607	0.04812	-0.5418	0.5879	0.1621	0.01448	1.052	0.01401	-0.003659	0.006044	76630	NA	NA	UK Biobank
Eotaxin	-0.07096	0.1314	-0.5401	0.5891	0.1274	0.07226	1.005	0.008602	0.002636	0.005586	8293	NA	NA	Young Finns Study (YFS)
Illnesses of siblings: None of the above (group 1)	-0.02673	0.04965	-0.5384	0.5903	0.03639	0.002594	1.019	0.008519	-0.002782	0.006043	281979	91010	190969	UK Biobank
Fractured bone site(s): Arm	0.0479	0.089	0.5382	0.5904	0.005024	0.001447	1	0.007589	-0.001152	0.005229	359241	355565	3676	UK Biobank
Diagnoses - main ICD10: J18 Pneumonia, organism unspecified	0.07562	0.1411	0.536	0.592	0.002193	0.001344	1.003	0.007126	0.003995	0.005457	361194	356564	4630	UK Biobank
Non-cancer illness code, self-reported: polymyalgia rheumatica	-0.05716	0.107	-0.5345	0.593	0.003915	0.001259	0.9887	0.007197	-0.0007252	0.005197	361141	360388	753	UK Biobank
Gap coding: Unable to work due to sickness or disability	0.05331	0.09981	0.5341	0.5932	0.01929	0.007102	0.9957	0.007113	0.006864	0.005329	67892	65864	2028	UK Biobank
Spherical power (left)	0.01934	0.03624	0.5336	0.5936	0.2577	0.01628	1.074	0.01444	-0.0005567	0.006465	77739	NA	NA	UK Biobank
Townsend deprivation index at recruitment	0.02186	0.041	0.5331	0.5939	0.03521	0.002104	1.029	0.008414	-0.004406	0.006202	360763	NA	NA	UK Biobank
Destinations on discharge from hospital (recoded): Transfer to other NHS provider	0.05309	0.09964	0.5328	0.5941	0.004119	0.001386	0.9913	0.007551	0.00353	0.005427	359437	358999	438	UK Biobank
Saturated fat	0.0572	0.1076	0.5314	0.5951	0.02644	0.00968	1.008	0.006296	0.004946	0.005106	51453	NA	NA	UK Biobank
Treatment/medication code: gaviscon liquid	0.06817	0.1295	0.5264	0.5986	0.003321	0.001418	0.999	0.007647	0.005642	0.005555	361141	359255	1886	UK Biobank
NA	0.0575	0.1093	0.5263	0.5987	0.003718	0.001369	0.9964	0.007012	0.001043	0.005549	361194	359250	1944	UK Biobank
Malignant neoplasm of respiratory system and intrathoracic organs	0.0575	0.1093	0.5263	0.5987	0.003718	0.001369	0.9964	0.007012	0.001043	0.005549	361194	359250	1944	UK Biobank
Peak expiratory flow (PEF)	-0.01662	0.03166	-0.5248	0.5997	0.1032	0.005436	1.068	0.01604	0.0002508	0.006793	329404	NA	NA	UK Biobank
Tinnitus: Yes, but not now, but have in the past	0.04705	0.09123	0.5157	0.6061	0.01725	0.004166	0.9931	0.007216	0.001755	0.005701	117882	104802	13080	UK Biobank
Non-cancer illness code, self-reported: varicose veins	0.07031	0.1364	0.5153	0.6063	0.002428	0.001305	1.013	0.006556	-0.001519	0.005565	361141	359842	1299	UK Biobank
Diagnoses - main ICD10: R51 Headache	0.04529	0.08793	0.5151	0.6065	0.004971	0.001473	0.9997	0.007024	0.0001088	0.005019	361194	356923	4271	UK Biobank
Easily tired during worst period of anxiety	0.06185	0.1203	0.514	0.6072	0.03586	0.01324	1.007	0.006417	0.003925	0.006169	34121	9577	24544	UK Biobank
Coffee type: Other type of coffee	0.06876	0.1345	0.5114	0.6091	0.003349	0.001758	1.003	0.006897	-0.001702	0.006035	283449	278658	4791	UK Biobank
Nerve, nerve root and plexus disorders	0.02722	0.05347	0.5091	0.6107	0.0188	0.00191	1.01	0.009305	0.003162	0.006162	361194	350296	10898	UK Biobank
Treatment/medication code: flax oil tablet	-0.08048	0.1584	-0.5081	0.6114	0.002125	0.001267	0.9974	0.006921	0.0008086	0.005506	361141	360543	598	UK Biobank
Treatment/medication code: chondroitin product	-0.0588	0.1166	-0.5042	0.6142	0.003014	0.001322	0.9998	0.007006	0.003217	0.005221	361141	356478	4663	UK Biobank
Inverse distance to the nearest road	-0.4956	0.9865	-0.5024	0.6154	0.0004864	0.001314	0.9971	0.006909	0.007964	0.005157	356078	NA	NA	UK Biobank
Age angina diagnosed	-0.06518	0.131	-0.4974	0.6189	0.08491	0.0494	0.9943	0.007914	0.009396	0.005358	10651	NA	NA	UK Biobank
Diagnoses - main ICD10: K81 Cholecystitis	0.07021	0.1413	0.4971	0.6192	0.00216	0.001431	1.001	0.00737	0.001798	0.005083	361194	359264	1930	UK Biobank
Age at first live birth	-0.01666	0.03358	-0.496	0.6199	0.1748	0.007619	1.04	0.01045	0.01011	0.00606	131987	NA	NA	UK Biobank
Body mass index (BMI)	0.01249	0.02521	0.4955	0.6202	0.245	0.01002	1.086	0.02254	-0.009898	0.007568	359983	NA	NA	UK Biobank
Cancer code, self-reported: malignant melanoma	-0.04433	0.08961	-0.4947	0.6208	0.005763	0.001519	0.9911	0.006896	-0.0004092	0.005747	361141	358243	2898	UK Biobank
Diagnoses - main ICD10: N40 Hyperplasia of prostate	-0.03998	0.08089	-0.4943	0.6211	0.006405	0.001802	1.028	0.007841	0.00328	0.005628	361194	356085	5109	UK Biobank
Underlying (primary) cause of death: ICD10: C45.9 Mesothelioma, unspecified	0.05531	0.1122	0.4929	0.6221	0.1725	0.06279	0.9861	0.009443	-0.004968	0.006609	9092	8983	109	UK Biobank
FI1 : numeric addition test	0.04459	0.09077	0.4913	0.6232	0.01456	0.004194	0.998	0.007028	0.002504	0.005312	116723	4758	111965	UK Biobank
How are people in household related to participant: Son and/or daughter (include step-children)	0.04049	0.08257	0.4904	0.6239	0.006916	0.001576	1.002	0.007511	-0.002313	0.005511	358963	237892	121071	UK Biobank
Treatment/medication code: ranitidine	0.04794	0.09791	0.4896	0.6244	0.004767	0.001422	1.003	0.007776	0.002569	0.004997	361141	355206	5935	UK Biobank
IL10	0.2117	0.4325	0.4894	0.6246	0.02869	0.07888	1.012	0.0134	-0.001388	0.005723	8293	NA	NA	Young Finns Study (YFS)
Diagnoses - main ICD10: R79 Other abnormal findings of blood chemistry	-0.04972	0.1017	-0.4887	0.625	0.004169	0.00133	1.007	0.007836	-0.001152	0.005018	361194	358572	2622	UK Biobank
Red blood cell count	-0.01806	0.03698	-0.4882	0.6254	0.1829	0.02033	1.033	0.02952	0.0003515	0.007007	173511	NA	NA	UK Biobank and INTERVAL
Treatment/medication code: calcichew d3 tablet	-0.05271	0.1083	-0.4865	0.6266	0.003642	0.001462	1.002	0.007519	0.01862	0.00576	361141	357718	3423	UK Biobank
Body mass index (BMI)	0.01219	0.02511	0.4853	0.6274	0.2454	0.009964	1.084	0.02212	-0.009684	0.007572	354831	NA	NA	UK Biobank
Vitamin supplement user	0.05631	0.1172	0.4804	0.6309	0.01953	0.009748	1.004	0.007132	0.004188	0.005336	51427	30308	21119	UK Biobank
Duration screen displayed	-0.0254	0.05298	-0.4794	0.6316	0.06088	0.005526	0.9997	0.008223	-0.004998	0.006126	119729	NA	NA	UK Biobank
Completion status of test: Heart rate reached safety level	-0.06378	0.1332	-0.4789	0.632	0.01881	0.009795	1.008	0.006992	0.00167	0.005392	54007	51084	2923	UK Biobank
Workplace very dusty: Often	0.03636	0.07608	0.478	0.6327	0.0348	0.006068	1.012	0.007475	-0.00314	0.005469	89631	80070	9561	UK Biobank
Stromal Cell-Derived Factor 1alpha	0.2209	0.4637	0.4763	0.6339	0.02471	0.05768	0.9925	0.008075	-0.002836	0.00574	8293	NA	NA	Young Finns Study (YFS)
Impedance of whole body	0.01328	0.02806	0.4733	0.636	0.2531	0.0107	1.127	0.02504	0.004769	0.008783	354795	NA	NA	UK Biobank
Diagnoses - main ICD10: N39 Other disorders of urinary system	0.03607	0.07671	0.4703	0.6382	0.007266	0.001457	1.009	0.007662	0.006887	0.005256	361194	350643	10551	UK Biobank
Hair colour (natural, before greying): Light brown	-0.02123	0.04578	-0.4637	0.6429	0.0251	0.005726	1.052	0.02781	0.004148	0.005616	360270	212710	147560	UK Biobank
Other, unspecified and serous retinal detachments	-0.06169	0.1331	-0.4633	0.6431	0.002857	0.001249	1.008	0.007508	0.003231	0.005811	361194	360271	923	UK Biobank
Treatment/medication code: xalacom 0.005%/0.5% eye drops	0.06899	0.1495	0.4615	0.6445	0.002601	0.001545	0.998	0.007567	-0.005413	0.005973	361141	360931	210	UK Biobank
FI7 : synonym	0.03154	0.06875	0.4588	0.6464	0.05335	0.007399	1.011	0.008062	0.01126	0.005757	84560	10534	74026	UK Biobank
Treatment/medication code: codeine	0.0423	0.09253	0.4571	0.6476	0.004782	0.001557	0.9925	0.007731	-0.001193	0.005165	361141	359271	1870	UK Biobank
Job involved shift work: Yes	0.03058	0.06703	0.4561	0.6483	0.03122	0.005529	1.001	0.007431	-0.0003202	0.005688	91149	65451	25698	UK Biobank
Neoplasms	0.02825	0.06238	0.4528	0.6507	0.01603	0.001993	1.011	0.009347	-0.003732	0.005809	361194	291016	70178	UK Biobank
Cereal type: Other (e.g. Cornflakes, Frosties)	-0.01765	0.03912	-0.4512	0.6519	0.03689	0.002431	1.014	0.008902	-0.002728	0.005459	299898	241793	58105	UK Biobank
Ulcerative colitis, NAS	0.04325	0.09647	0.4483	0.6539	0.006206	0.001692	1.014	0.00774	0.007482	0.006264	361194	359291	1903	UK Biobank
Eye problems/disorders: Glaucoma	0.03186	0.07116	0.4477	0.6544	0.04065	0.00526	1.018	0.008473	-0.0008456	0.005853	117890	112798	5092	UK Biobank
Job coding: town planner, development officer	-0.05306	0.1186	-0.4476	0.6545	0.01415	0.006236	0.982	0.007589	0.004197	0.0065	89866	89649	217	UK Biobank
Mouth/teeth dental problems: Dentures	0.01752	0.03934	0.4453	0.6561	0.05506	0.002849	1.033	0.01072	-0.009995	0.006652	359841	298864	60977	UK Biobank
Witnessed sudden violent death	-0.03309	0.07476	-0.4425	0.6581	0.02375	0.004369	1.011	0.007343	0.006812	0.005572	117862	101903	15959	UK Biobank
Decayed, Missing and Filled tooth Surfaces (DMFS) + Dentures	0.01645	0.03731	0.441	0.6592	0.08609	0.003749	1.008	0.0116	-0.01331	0.006632	487823	383317	104506	UK Biobank + GLIDE
Job SOC coding: Food, drink and tobacco process operatives	0.04447	0.1009	0.4406	0.6595	0.01741	0.005555	0.9807	0.008102	-0.005156	0.005723	91149	90902	247	UK Biobank
Gap coding: Full-time or part-time education	-0.0439	0.09967	-0.4405	0.6596	0.02298	0.00735	1.007	0.007741	0.01019	0.005629	68899	56410	12489	UK Biobank
Non-cancer illness code, self-reported: glaucoma	0.03256	0.07397	0.4402	0.6598	0.01192	0.001572	1.016	0.008112	0.0007551	0.005811	361141	357355	3786	UK Biobank
Diagnoses - main ICD10: C44 Other malignant neoplasms of skin	-0.02841	0.06487	-0.438	0.6614	0.01909	0.003476	1	0.01246	-0.003682	0.006033	361194	352108	9086	UK Biobank
#Arthrosis	-0.02112	0.04825	-0.4377	0.6616	0.02906	0.002487	1.027	0.01058	0.01003	0.005883	361194	336217	24977	UK Biobank
Usual side of head for mobile phone use: Right	0.02199	0.05044	0.436	0.6628	0.0264	0.003115	1.008	0.01033	-0.01531	0.006182	303009	127654	175355	UK Biobank
Impedance of leg (left)	0.01286	0.02949	0.4359	0.6629	0.2366	0.01073	1.118	0.02438	-0.003477	0.008714	354811	NA	NA	UK Biobank
Thoughts of death during worst depression	0.04964	0.1141	0.4351	0.6635	0.01892	0.007372	1.008	0.007536	0.002426	0.005444	62648	30018	32630	UK Biobank
Corneal resistance factor (left)	0.02011	0.04627	0.4346	0.6639	0.1484	0.01355	1.035	0.01252	-0.002613	0.006096	76510	NA	NA	UK Biobank
Impedance of arm (left)	0.01271	0.02935	0.4332	0.6648	0.2247	0.00889	1.123	0.02434	0.008791	0.008609	354807	NA	NA	UK Biobank
Mean platelet volume	-0.01551	0.0359	-0.4321	0.6657	0.2477	0.0353	1.063	0.05437	-0.002235	0.007427	173502	NA	NA	UK Biobank and INTERVAL
Job SOC coding: Medical practitioners	0.0414	0.09582	0.4321	0.6657	0.02437	0.005929	1.002	0.006874	0.007183	0.005913	91149	89649	1500	UK Biobank
Hair colour (natural, before greying): Black	-0.0191	0.04461	-0.4281	0.6686	0.03569	0.009997	1.054	0.04837	-0.007765	0.006875	360270	344461	15809	UK Biobank
Workplace very cold: Often	0.03187	0.07446	0.428	0.6686	0.02877	0.005992	1.007	0.006883	0.002496	0.004736	90188	82307	7881	UK Biobank
Been involved in combat or exposed to war-zone	0.05572	0.1306	0.4266	0.6697	0.01015	0.00423	1.005	0.007457	0.003931	0.006209	117954	113944	4010	UK Biobank
Treatment/medication code: gliclazide	0.03091	0.07275	0.4248	0.671	0.008929	0.001521	1.026	0.008591	-0.007429	0.00573	361141	358134	3007	UK Biobank
Illnesses of mother: Breast cancer	-0.03257	0.0768	-0.4241	0.6715	0.008493	0.002009	1.006	0.009354	0.003437	0.005803	330828	303206	27622	UK Biobank
Hypertension	0.05157	0.1223	0.4216	0.6733	0.003918	0.001476	0.9905	0.006586	-0.002891	0.005872	361194	359957	1237	UK Biobank
Mother still alive	0.03532	0.08429	0.419	0.6752	0.005981	0.001602	1.009	0.008237	-0.002755	0.005403	355029	214783	140246	UK Biobank
Palmar fascial fibromatosis [Dupuytren]	0.0299	0.07157	0.4178	0.6761	0.01284	0.004507	1.05	0.03202	-0.006036	0.006281	361194	358246	2948	UK Biobank
Job SOC coding: Town planners	-0.05389	0.1295	-0.4163	0.6772	0.01181	0.006267	0.9849	0.007767	0.003996	0.006476	91149	90928	221	UK Biobank
Platelet crit	0.01223	0.02941	0.4156	0.6777	0.1805	0.01505	1.27	0.04068	0.005781	0.00759	350471	NA	NA	UK Biobank
Neutrophill percentage	0.01611	0.03883	0.4148	0.6783	0.1289	0.01208	1.127	0.03195	0.004631	0.007874	349861	NA	NA	UK Biobank
Treatment/medication code: doxazosin	-0.03542	0.08603	-0.4117	0.6805	0.007669	0.001484	1.011	0.007675	0.007129	0.005705	361141	357098	4043	UK Biobank
Disorders of brain, other and unspecified	0.04805	0.1169	0.4111	0.681	0.004201	0.001634	0.9775	0.008748	0.001018	0.006837	361194	361067	127	UK Biobank
Treatment/medication code: salmeterol product	0.06754	0.1651	0.4092	0.6824	0.001991	0.001332	1.003	0.007877	0.002918	0.006299	361141	360917	224	UK Biobank
Substances taken for depression: Unprescribed medication (more than once)	-0.04983	0.122	-0.4086	0.6829	0.009544	0.004129	0.994	0.007139	0.005423	0.005496	117763	113652	4111	UK Biobank
Heel broadband ultrasound attenuation (left)	-0.01569	0.03847	-0.4079	0.6834	0.2384	0.02839	1.029	0.0209	0.0005348	0.006583	114625	NA	NA	UK Biobank
Smoking status: Current	0.01481	0.03639	0.407	0.684	0.05267	0.002845	1.005	0.01038	-0.007964	0.006295	359706	322618	37088	UK Biobank
Workplace very noisy: Rarely/never	-0.03465	0.08609	-0.4025	0.6874	0.02684	0.006582	1.005	0.008131	0.01652	0.005775	90897	21382	69515	UK Biobank
Job SOC coding: Elementary office occupations n.e.c.	-0.0458	0.1141	-0.4013	0.6882	0.01142	0.005249	1	0.006911	-0.00228	0.005225	91149	87809	3340	UK Biobank
Age cataract diagnosed	0.1338	0.3336	0.4011	0.6883	0.04209	0.09443	0.9981	0.006885	-0.004782	0.005733	5020	NA	NA	UK Biobank
Home area population density - urban or rural: Scotland - Other Urban Area	-0.04387	0.1098	-0.3997	0.6894	0.003356	0.001588	1.055	0.007335	-0.0009896	0.005194	357712	353714	3998	UK Biobank
Thalamus volume	-0.03956	0.09939	-0.398	0.6906	0.1377	0.04442	0.9846	0.007684	0.001881	0.005705	30724	NA	NA	ENIGMA
Treatment/medication code: diclofenac sodium+misoprostol	0.04693	0.1179	0.3981	0.6906	0.003211	0.001394	0.9835	0.007377	0.000964	0.005788	361141	360890	251	UK Biobank
Diabetes diagnosed by doctor	0.01591	0.04	0.3979	0.6907	0.04066	0.002701	1.065	0.01362	-0.0105	0.006329	360192	342917	17275	UK Biobank
Manifestations of mania or irritability: I was more talkative than usual	0.02786	0.07079	0.3935	0.6939	0.02616	0.004675	1	0.006868	0.008736	0.005466	114422	108957	5465	UK Biobank
Noninfectious colitis NAS	0.03331	0.08526	0.3907	0.696	0.006725	0.001439	0.9941	0.006798	0.009435	0.005541	361194	352249	8945	UK Biobank
Job SOC coding: Ship and hovercraft officers	0.04574	0.1173	0.3899	0.6966	0.01132	0.005282	0.98	0.007724	-0.003904	0.005957	91149	90807	342	UK Biobank
Cognitive Performance	0.0104	0.02673	0.3891	0.6972	0.2039	0.007907	1.005	0.01628	0.01225	0.006889	257841	NA	NA	SSGAC
Vitamin and/or mineral supplement use: Vitamin C	0.06361	0.1636	0.3889	0.6973	0.01315	0.01051	0.9975	0.007425	0.003781	0.005266	51427	48136	3291	UK Biobank
Treatment/medication code: glucosamine product	0.0332	0.08548	0.3884	0.6977	0.006141	0.001506	1.008	0.007491	0.005018	0.005711	361141	336928	24213	UK Biobank
Handedness (chirality/laterality): Left-handed	0.02535	0.06575	0.3856	0.6998	0.01034	0.001539	1.001	0.00798	6.847e-05	0.005854	360913	326328	34585	UK Biobank
Ever had known person concerned about, or recommend reduction of, alcohol consumption: Yes, but not in the last year	-0.04129	0.1072	-0.3854	0.6999	0.01302	0.004202	1.002	0.007102	0.004314	0.005384	117880	112398	5482	UK Biobank
Usual side of head for mobile phone use: Equally left and right	-0.02692	0.07004	-0.3844	0.7007	0.01357	0.001877	1.004	0.007627	0.008461	0.005595	303009	283157	19852	UK Biobank
Qualifications: NVQ or HND or HNC or equivalent	0.02399	0.06244	0.3843	0.7008	0.01407	0.001651	1.008	0.007679	0.004447	0.005964	357549	291005	66544	UK Biobank
Reason for reducing amount of alcohol drunk: Illness or ill health	0.04616	0.1204	0.3835	0.7013	0.009798	0.003614	1.007	0.007662	0.002072	0.006053	134033	124521	9512	UK Biobank
Rotator cuff syndrome	0.03099	0.08097	0.3827	0.7019	0.007842	0.001498	0.9924	0.007794	-0.003571	0.005549	361194	358909	2285	UK Biobank
Diagnoses - main ICD10: K60 Fissure and fistula of anal and rectal regions	0.03759	0.09848	0.3817	0.7027	0.005195	0.001359	0.9899	0.007621	0.002111	0.005475	361194	359085	2109	UK Biobank
Treatment/medication code: clopidogrel	0.04051	0.1062	0.3814	0.7029	0.003895	0.001444	1.005	0.007418	0.00115	0.005663	361141	358851	2290	UK Biobank
Intra-ocular pressure, Goldmann-correlated (left)	-0.01538	0.04071	-0.3778	0.7056	0.187	0.01223	1.035	0.0126	0.0008778	0.00596	76510	NA	NA	UK Biobank
Forced expiratory volume in 1-second (FEV1), predicted	0.01184	0.03143	0.3767	0.7064	0.4315	0.02578	1.114	0.02517	-0.008484	0.007647	117241	NA	NA	UK Biobank
Job coding: other general office clerical tasks including: office junior, office worker, photocopy/print room operator, office machinist	-0.04265	0.1134	-0.376	0.7069	0.01187	0.005262	1.001	0.006779	-0.00304	0.005245	89866	86596	3270	UK Biobank
How are people in household related to participant: Husband, wife or partner	0.01612	0.04292	0.3755	0.7073	0.02622	0.001872	1.007	0.008462	-0.007193	0.005368	358963	93225	265738	UK Biobank
Diagnoses - main ICD10: Z09 Follow-up examination after treatment for conditions other than malignant neoplasms	-0.03116	0.08319	-0.3746	0.708	0.005783	0.001363	0.9941	0.006897	0.003106	0.005098	361194	352730	8464	UK Biobank
Transport type for commuting to job workplace: Public transport	-0.02204	0.05915	-0.3727	0.7094	0.03047	0.00327	1.019	0.00859	0.004692	0.006381	190832	151177	39655	UK Biobank
Potassium in urine	-0.01645	0.04417	-0.3724	0.7096	0.03965	0.002345	1.014	0.00922	-0.007196	0.006349	350053	NA	NA	UK Biobank
Trigger finger	-0.03984	0.1074	-0.3708	0.7107	0.004378	0.001475	1.005	0.007397	0.005632	0.005217	361194	359195	1999	UK Biobank
Low back pain	0.02802	0.07592	0.3691	0.7121	0.01077	0.00167	0.9875	0.007903	-0.005244	0.005973	361194	355771	5423	UK Biobank
Intra-ocular pressure, corneal-compensated (right)	-0.01723	0.04737	-0.3638	0.716	0.1108	0.009437	1.017	0.01003	-0.001264	0.006439	76630	NA	NA	UK Biobank
Illnesses of siblings: Bowel cancer	0.03916	0.1077	0.3634	0.7163	0.004623	0.001781	0.9985	0.006696	-0.00304	0.004888	279242	272515	6727	UK Biobank
Cereal type: Bran cereal (e.g. All Bran, Branflakes)	0.02907	0.08032	0.3619	0.7174	0.008835	0.001812	1.013	0.007475	-0.009053	0.005341	299898	249289	50609	UK Biobank
Retinal detachments and breaks	-0.03096	0.0856	-0.3616	0.7176	0.008182	0.001615	1.009	0.007216	0.007202	0.005608	361194	358151	3043	UK Biobank
Diagnoses - main ICD10: M15 Polyarthrosis	0.0449	0.1248	0.3598	0.719	0.002715	0.001237	1.005	0.006833	0.004265	0.005209	361194	359930	1264	UK Biobank
Interpolated Age of participant when cancer first diagnosed	-0.05018	0.1396	-0.3594	0.7193	0.02274	0.01643	1.004	0.006881	-0.001861	0.004994	30871	NA	NA	UK Biobank
FI10 : arithmetic sequence recognition	0.02541	0.07069	0.3594	0.7193	0.1602	0.02685	0.9989	0.007987	0.004001	0.005397	20880	4159	16721	UK Biobank
Job coding: machine operator, processor, foreman	0.03557	0.09915	0.3588	0.7198	0.01846	0.005702	0.9805	0.008254	-0.004523	0.005835	89866	89623	243	UK Biobank
Non-cancer illness code, self-reported: rheumatoid arthritis	-0.03546	0.09905	-0.358	0.7203	0.005883	0.001491	1.002	0.007437	0.009725	0.005778	361141	357124	4017	UK Biobank
Diagnoses - main ICD10: I12 Hypertensive renal disease	0.04856	0.1356	0.358	0.7204	0.002958	0.001407	0.9824	0.007699	-0.0006322	0.006094	361194	361018	176	UK Biobank
STROKE	0.07177	0.2012	0.3567	0.7213	0.001202	0.001342	1.017	0.007221	-0.001046	0.005556	361194	355048	6146	UK Biobank
Mean sphered cell volume	0.01147	0.03243	0.3538	0.7235	0.1639	0.01714	1.242	0.05933	0.002053	0.007559	344729	NA	NA	UK Biobank
Diagnoses - main ICD10: E11 Non-insulin-dependent diabetes mellitus	-0.04457	0.1262	-0.3531	0.724	0.002495	0.001402	1.009	0.007827	0.000229	0.005454	361194	360489	705	UK Biobank
High light scatter reticulocyte percentage	0.01321	0.03744	0.3529	0.7242	0.06243	0.006271	1.084	0.03177	-0.007093	0.006651	344729	NA	NA	UK Biobank
Illnesses of father: Stroke	-0.03805	0.1085	-0.3508	0.7257	0.003934	0.001515	1.011	0.006742	0.01204	0.005245	314801	265628	49173	UK Biobank
Tense, sore, or aching muscles during worst period of anxiety	0.02622	0.07498	0.3496	0.7266	0.07357	0.01642	0.9971	0.006623	0.0007666	0.005213	33301	20305	12996	UK Biobank
Treatment/medication code: dihydrocodeine	-0.04178	0.1208	-0.3459	0.7294	0.003294	0.001446	0.9979	0.007612	0.01032	0.005609	361141	359851	1290	UK Biobank
Diastolic blood pressure, automated reading	-0.01072	0.03105	-0.3451	0.73	0.1338	0.005699	1.077	0.01745	-0.01261	0.00709	340162	NA	NA	UK Biobank
More irritable than usual during worst period of anxiety	-0.0383	0.1122	-0.3415	0.7328	0.03308	0.01445	1.008	0.007082	0.007016	0.005033	33425	9411	24014	UK Biobank
Non-cancer illness code, self-reported: stroke	-0.04327	0.1271	-0.3404	0.7336	0.002986	0.00132	1.009	0.007302	0.003438	0.006223	361141	356305	4836	UK Biobank
White blood cell count	0.01437	0.04262	0.3372	0.736	0.1811	0.01846	0.9706	0.02223	0.006927	0.007379	173515	NA	NA	UK Biobank and INTERVAL
Treatment/medication code: risedronate sodium	0.06064	0.1801	0.3368	0.7363	0.002068	0.001195	0.9947	0.006475	0.007126	0.005982	361141	360423	718	UK Biobank
Illnesses of siblings: Stroke	0.04485	0.1335	0.336	0.7369	0.003534	0.001741	1.006	0.007125	0.001949	0.005246	279577	270380	9197	UK Biobank
Maternal smoking around birth	0.01428	0.04278	0.3338	0.7385	0.04664	0.002858	1.031	0.009742	0.006312	0.006702	309942	214760	95182	UK Biobank
Mean corpuscular haemoglobin concentration	0.0141	0.04275	0.3298	0.7415	0.03902	0.00504	1.037	0.01708	-0.007041	0.006013	350468	NA	NA	UK Biobank
Coeliac disease	0.0373	0.1144	0.3261	0.7444	0.005005	0.00155	0.9912	0.007682	0.01353	0.005783	361194	360352	842	UK Biobank
Diagnoses - main ICD10: I80 Phlebitis and thrombophlebitis	0.02431	0.07498	0.3242	0.7458	0.009048	0.001837	1.001	0.009885	0.002598	0.005613	361194	358905	2289	UK Biobank
Type of tobacco previously smoked: Manufactured cigarettes	0.04024	0.1243	0.3236	0.7462	0.01154	0.00482	1.008	0.006805	-0.005024	0.005843	89224	10111	79113	UK Biobank
6mm asymmetry angle (left)	-0.02524	0.07801	-0.3236	0.7463	0.06506	0.01318	1.027	0.007317	0.002913	0.005635	40683	NA	NA	UK Biobank
Number of attempts	0.01534	0.04764	0.3219	0.7475	0.06051	0.005551	1.01	0.009101	-0.01113	0.005318	119729	23991	95738	UK Biobank
Vitamin and/or mineral supplement use: Vitamin E	0.05346	0.1662	0.3217	0.7477	0.01482	0.01004	1.001	0.006759	0.002951	0.005732	51427	50466	961	UK Biobank
Leisure/social activities: None of the above	-0.01319	0.04131	-0.3193	0.7495	0.03739	0.002147	1.015	0.00834	0.0009772	0.005436	360063	251359	108704	UK Biobank
Illnesses of siblings: Lung cancer	-0.05689	0.1784	-0.3188	0.7499	0.002764	0.002071	1.006	0.00803	-0.01022	0.00564	279301	273112	6189	UK Biobank
Job coding: author, writer, biographer, book editor, novelist, dramatist, playwright, poet	0.04428	0.1395	0.3174	0.7509	0.01152	0.005189	0.9872	0.0079	0.008188	0.007025	89866	89589	277	UK Biobank
Platelet count	0.01172	0.0371	0.316	0.752	0.216	0.01838	1.03	0.03092	0.008747	0.007263	173510	NA	NA	UK Biobank and INTERVAL
Hair colour (natural, before greying): Other	-0.03516	0.1114	-0.3158	0.7522	0.00359	0.001541	1.012	0.006576	-0.002503	0.005027	360270	355789	4481	UK Biobank
Hippocampus volume	0.02941	0.09324	0.3154	0.7524	0.1698	0.04639	0.9839	0.007707	-0.005141	0.005968	30721	NA	NA	ENIGMA
Type of tobacco previously smoked: Cigars or pipes	-0.04851	0.1543	-0.3144	0.7532	0.006962	0.005332	1.003	0.006023	0.007367	0.005908	89224	85091	4133	UK Biobank
FI3 : word interpolation	0.01404	0.04469	0.3141	0.7535	0.08744	0.00617	1.007	0.008181	0.009757	0.006301	116815	18062	98753	UK Biobank
Non-butter spread type details: Other low or reduced fat spread	0.02911	0.09367	0.3108	0.756	0.01091	0.002959	0.9962	0.007478	-0.0005916	0.006329	190094	171059	19035	UK Biobank
Bipolar and major depression status: Probable Recurrent major depression (moderate)	0.02417	0.07945	0.3042	0.761	0.0304	0.006162	0.9939	0.006542	-0.002135	0.00579	86895	75993	10902	UK Biobank
Worked with materials containing asbestos: Sometimes	-0.0303	0.09972	-0.3039	0.7612	0.02784	0.007175	0.9983	0.00754	0.003653	0.005678	77361	68964	8397	UK Biobank
Mineral and other dietary supplements: Fish oil (including cod liver oil)	0.0143	0.04723	0.3028	0.762	0.02596	0.001941	1.017	0.008795	0.006402	0.006012	360016	245885	114131	UK Biobank
Mesothelioma	0.03777	0.1251	0.3019	0.7627	0.003371	0.001546	0.9948	0.009113	-0.006815	0.006351	361194	361029	165	UK Biobank
Mesothelioma	0.03777	0.1251	0.3019	0.7627	0.003371	0.001546	0.9948	0.009113	-0.006815	0.006351	361194	361029	165	UK Biobank
NA	0.03145	0.1046	0.3008	0.7636	0.004164	0.001553	0.9825	0.008269	0.007217	0.005935	361194	360685	509	UK Biobank
Mean reticulocyte volume	0.009866	0.03298	0.2992	0.7648	0.1528	0.01604	1.231	0.06573	-0.002339	0.007524	344728	NA	NA	UK Biobank
Triglycerides	-0.01281	0.04293	-0.2985	0.7653	0.09886	0.02479	0.847	0.03088	0.005911	0.006803	188580	NA	NA	GLGC
Medication for cholesterol, blood pressure, diabetes, or take exogenous hormones: None of the above	0.01397	0.04706	0.2968	0.7666	0.06909	0.004965	1.016	0.01126	0.001482	0.006504	193148	59810	133338	UK Biobank
Speech-reception-threshold (SRT) estimate (right)	-0.02655	0.08954	-0.2965	0.7668	0.0179	0.004875	1.007	0.007405	-0.001031	0.005353	114720	NA	NA	UK Biobank
Treatment/medication code: bendrofluazide	-0.02536	0.08562	-0.2961	0.7671	0.006184	0.001475	0.9935	0.007464	-0.00514	0.005415	361141	359219	1922	UK Biobank
Reticulocyte percentage	0.01148	0.03877	0.2961	0.7672	0.05731	0.005915	1.053	0.02599	-0.008885	0.006437	344728	NA	NA	UK Biobank
Type 2 diabetes	-0.03815	0.1293	-0.295	0.768	0.002398	0.001409	1.009	0.007836	-6.671e-05	0.005447	361194	360306	888	UK Biobank
Treatment/medication code: valsartan	0.02892	0.09802	0.295	0.768	0.005359	0.001406	0.9884	0.006932	-0.002615	0.005388	361141	359434	1707	UK Biobank
Gap coding: Looking after the home and/or family	0.03252	0.1105	0.2943	0.7685	0.02072	0.00741	0.9962	0.007326	0.003578	0.005178	69370	44793	24577	UK Biobank
Destinations on discharge from hospital (recoded): Transfer to other NHS provider: General ward, young physically disabled, A&E	0.04706	0.1628	0.2891	0.7725	0.001739	0.00138	1.004	0.00726	-0.003442	0.005466	359670	354430	5240	UK Biobank
Diagnoses - main ICD10: I48 Atrial fibrillation and flutter	0.01938	0.06707	0.2889	0.7726	0.01779	0.002281	1.014	0.01162	-0.001735	0.005457	361194	354838	6356	UK Biobank
Job coding: primary /junior school teacher or teaching professional, nursery school teacher (including head teacher)	0.03581	0.1239	0.289	0.7726	0.01691	0.006119	0.9951	0.007877	-0.0007676	0.006415	89866	84311	5555	UK Biobank
Age heart attack diagnosed	0.03857	0.1337	0.2886	0.7729	0.1231	0.06118	0.9881	0.007233	-0.001743	0.005409	8024	NA	NA	UK Biobank
Cereal type: Muesli	-0.01072	0.03725	-0.2878	0.7735	0.0524	0.002681	1.025	0.008811	0.01124	0.005852	299898	238375	61523	UK Biobank
Completion status of test: Fully completed	0.03932	0.1381	0.2848	0.7758	0.01674	0.009516	1.004	0.007271	-0.00193	0.005358	54007	3792	50215	UK Biobank
Chest pain or discomfort walking normally	-0.01932	0.06784	-0.2847	0.7759	0.07679	0.01007	1.003	0.007495	0.002273	0.005632	55737	46120	9617	UK Biobank
Doctor diagnosed sarcoidosis	0.03271	0.1149	0.2846	0.7759	0.01268	0.006005	0.9975	0.007903	0.001782	0.006118	91787	91392	395	UK Biobank
Diagnoses - main ICD10: M23 Internal derangement of knee	-0.01712	0.06034	-0.2837	0.7766	0.01192	0.001833	1.011	0.007883	0.006541	0.005719	361194	349363	11831	UK Biobank
Own or rent accommodation lived in: Own with a mortgage	-0.0185	0.06557	-0.2822	0.7778	0.01223	0.001744	1	0.008137	0.004638	0.005621	356340	225107	131233	UK Biobank
Meniscus derangement	-0.01693	0.06001	-0.2822	0.7778	0.01145	0.001759	1.013	0.007716	0.004223	0.005794	361194	350363	10831	UK Biobank
Job SOC coding: Heavy goods vehicle drivers	-0.02857	0.1017	-0.2808	0.7789	0.01839	0.005167	0.9839	0.00687	0.003562	0.005357	91149	90448	701	UK Biobank
Corneal hysteresis (right)	-0.0148	0.05273	-0.2807	0.7789	0.128	0.01149	1.035	0.01104	-0.002449	0.006446	76630	NA	NA	UK Biobank
Diagnoses - main ICD10: R14 Flatulence and related conditions	0.02856	0.1024	0.2789	0.7803	0.004421	0.001427	0.9817	0.007953	0.00709	0.005215	361194	360863	331	UK Biobank
Diagnoses - main ICD10: R53 Malaise and fatigue	0.04448	0.1598	0.2784	0.7807	0.002157	0.001498	0.9955	0.007329	0.004129	0.006246	361194	360376	818	UK Biobank
Diagnoses - main ICD10: D86 Sarcoidosis	0.03687	0.1337	0.2758	0.7827	0.002926	0.001493	0.9955	0.007798	-0.001967	0.006911	361194	361024	170	UK Biobank
Cereal type: Biscuit cereal (e.g. Weetabix)	-0.0195	0.07074	-0.2757	0.7828	0.01083	0.001958	1.018	0.007628	-0.0028	0.005435	299898	246588	53310	UK Biobank
Non-cancer illness code, self-reported: hyperthyroidism/thyrotoxicosis	0.02328	0.08447	0.2757	0.7828	0.007358	0.001886	1.004	0.008257	-0.002599	0.005803	361141	358411	2730	UK Biobank
3mm asymmetry angle (left)	0.01761	0.06404	0.275	0.7833	0.06263	0.008661	1.012	0.0072	-0.0002762	0.006143	73818	NA	NA	UK Biobank
Age of primiparous women at birth of child	0.02269	0.08272	0.2743	0.7838	0.1093	0.022	1.001	0.007457	-0.001255	0.006286	25545	NA	NA	UK Biobank
Home area population density - urban or rural: England/Wales - Urban - less sparse	0.02555	0.09312	0.2744	0.7838	0.005467	0.001559	1.123	0.007911	0.001328	0.006024	357712	78712	279000	UK Biobank
Why stopped smoking: None of the above	-0.01948	0.07111	-0.2739	0.7842	0.03786	0.006027	0.9982	0.007039	-0.007818	0.00518	88516	70768	17748	UK Biobank
Accumbens volume	0.03616	0.1323	0.2733	0.7846	0.07194	0.04077	0.9859	0.006901	0.0004804	0.005836	30718	NA	NA	ENIGMA
Mineral and other dietary supplements: Glucosamine	0.01452	0.05321	0.2728	0.785	0.02309	0.001895	1.015	0.007709	0.01149	0.006591	360016	289798	70218	UK Biobank
3mm weak meridian (left)	0.01003	0.03681	0.2725	0.7852	0.3277	0.02974	1.091	0.03149	-0.01062	0.006308	75398	NA	NA	UK Biobank
Peripheral artery disease	0.03838	0.1408	0.2725	0.7852	0.002265	0.001405	1.009	0.007116	-0.0007844	0.005051	361194	359964	1230	UK Biobank
Illnesses of mother: Lung cancer	-0.02927	0.1079	-0.2714	0.7861	0.00362	0.00155	1.008	0.007059	-0.0003511	0.005461	330689	317000	13689	UK Biobank
Usual side of head for mobile phone use: Left	-0.0148	0.05472	-0.2704	0.7868	0.02294	0.002831	1.009	0.01009	0.01154	0.006162	303009	195207	107802	UK Biobank
Heel broadband ultrasound attenuation (right)	0.0112	0.04149	0.27	0.7871	0.241	0.02852	1.031	0.01995	-0.004972	0.006985	114609	NA	NA	UK Biobank
IL6	0.1182	0.4399	0.2687	0.7882	0.0206	0.05952	1.003	0.007828	-0.002748	0.005703	8293	NA	NA	Young Finns Study (YFS)
Treatment/medication code: nicorandil	-0.03409	0.1274	-0.2675	0.7891	0.002824	0.001363	1.013	0.007238	0.006752	0.005738	361141	359989	1152	UK Biobank
Illnesses of siblings: Breast cancer	-0.03272	0.1224	-0.2673	0.7892	0.003538	0.002008	1.006	0.007314	-0.003252	0.005345	279478	267033	12445	UK Biobank
Job SOC coding: Primary and nursery education teaching professionals	0.03277	0.1227	0.2671	0.7894	0.01631	0.005943	0.9962	0.00782	-0.001011	0.006359	91149	85524	5625	UK Biobank
Bread intake	0.009969	0.03786	0.2633	0.7923	0.04727	0.002994	1.013	0.01128	0.004558	0.006261	353030	NA	NA	UK Biobank
Mean corpuscular volume	-0.006857	0.02635	-0.2602	0.7947	0.1875	0.01818	1.26	0.06934	0.002518	0.007401	350473	NA	NA	UK Biobank
Non-cancer illness code, self-reported: leg claudication/ intermittent claudication	0.03934	0.1522	0.2585	0.796	0.002603	0.00149	0.993	0.008746	0.000519	0.006889	361141	360864	277	UK Biobank
Dissection of aorta	0.03589	0.1404	0.2557	0.7982	0.002314	0.00153	0.9906	0.008761	-0.008363	0.00638	361194	361065	129	UK Biobank
Job coding: management information officer, conference/events co-ordinator/organiser, exhibition officer, work study engineer/officer/analyst, contract adviser/agent, election agent, business system analyst	-0.02399	0.09435	-0.2543	0.7993	0.01713	0.005174	0.9867	0.007144	0.008397	0.005247	89866	88009	1857	UK Biobank
Treatment/medication code: thyroxine product	0.02536	0.1001	0.2535	0.7999	0.009209	0.002376	1.002	0.009739	-0.00667	0.006736	361141	356895	4246	UK Biobank
Reason for glasses/contact lenses: For 'astigmatism'	0.01868	0.07379	0.2532	0.8001	0.009894	0.00166	1.012	0.007398	0.003593	0.006015	360677	350925	9752	UK Biobank
Fluid intelligence score	0.008	0.03205	0.2496	0.8029	0.2355	0.01038	1.036	0.01129	0.01564	0.006949	117131	NA	NA	UK Biobank
Night shifts worked: This type of shift pattern was not worked during job	0.02818	0.1134	0.2486	0.8037	0.04026	0.01981	0.9977	0.007521	0.002719	0.00469	25697	917	24780	UK Biobank
Spread type: Other type of spread/margarine	0.01202	0.04878	0.2465	0.8053	0.0302	0.002202	1.003	0.009417	-0.01376	0.006003	360291	169698	190593	UK Biobank
Treatment/medication code: sumatriptan	-0.02689	0.1093	-0.246	0.8057	0.002856	0.00143	1.011	0.007217	-0.001354	0.004914	361141	360155	986	UK Biobank
Manifestations of mania or irritability: I was more active than usual	0.01965	0.08201	0.2396	0.8107	0.01821	0.004519	1.004	0.007427	0.0119	0.0059	114422	108734	5688	UK Biobank
Job coding: medical doctor, general practitioner, hospital consultant	0.02346	0.09807	0.2392	0.8109	0.02406	0.006297	0.9997	0.006963	0.007822	0.005936	89866	88399	1467	UK Biobank
Platelet distribution width	-0.007592	0.03221	-0.2357	0.8136	0.1844	0.02154	1.198	0.06674	-0.002467	0.007924	350470	NA	NA	UK Biobank
Medication for cholesterol, blood pressure or diabetes: Blood pressure medication	0.008948	0.03803	0.2353	0.814	0.1126	0.006463	1.05	0.0114	-0.003163	0.006334	165340	124353	40987	UK Biobank
Job coding: civil engineer	-0.02757	0.1174	-0.2348	0.8143	0.01429	0.005557	0.9838	0.007866	0.003393	0.006042	89866	89383	483	UK Biobank
Adopted as a child	0.02146	0.0916	0.2343	0.8148	0.005702	0.001332	1.003	0.007625	-0.003929	0.005346	360450	355292	5158	UK Biobank
Why reduced smoking: Health precaution	-0.0305	0.1334	-0.2287	0.8191	0.07876	0.04229	0.9888	0.006968	0.009308	0.005517	11443	6000	5443	UK Biobank
Transport type for commuting to job workplace: Car/motor vehicle	0.01397	0.06127	0.2279	0.8197	0.02717	0.003191	1.014	0.007963	0.0008111	0.00594	190832	38351	152481	UK Biobank
How are people in household related to participant: Mother and/or father	-0.03316	0.1458	-0.2275	0.82	0.002382	0.001413	1.005	0.007247	-0.0007279	0.005511	358963	352661	6302	UK Biobank
RANTES	0.03156	0.1387	0.2275	0.82	0.09645	0.05701	0.9897	0.007557	0.001168	0.0056	8293	NA	NA	Young Finns Study (YFS)
Non-cancer illness code, self-reported: heart attack/myocardial infarction	0.01195	0.05264	0.227	0.8204	0.01938	0.001775	1.012	0.008646	-0.00819	0.005606	361141	352902	8239	UK Biobank
Cylindrical power (right)	0.01824	0.08044	0.2268	0.8206	0.03291	0.006307	1.004	0.006748	0.001713	0.006221	77983	NA	NA	UK Biobank
Vascular/heart problems diagnosed by doctor: Stroke	0.02678	0.1206	0.2221	0.8242	0.003066	0.001342	1.01	0.00739	0.002197	0.00606	360420	354833	5587	UK Biobank
Malignant neoplasm of breast	-0.01635	0.07376	-0.2217	0.8245	0.01188	0.002052	1.027	0.01004	-0.006119	0.005894	361194	351473	9721	UK Biobank
Malignant neoplasm of breast	-0.01635	0.07376	-0.2217	0.8245	0.01188	0.002052	1.027	0.01004	-0.006119	0.005894	361194	351473	9721	UK Biobank
Non-cancer illness code, self-reported: other abdominal problem	-0.02536	0.1146	-0.2213	0.8248	0.003768	0.001386	0.9878	0.00741	-0.002102	0.005723	361141	360719	422	UK Biobank
Diagnoses - main ICD10: C02 Malignant neoplasm of other and unspecified parts of tongue	0.03146	0.143	0.22	0.8259	0.002511	0.001386	0.994	0.007454	-0.00317	0.006391	361194	361042	152	UK Biobank
Dentures	0.008461	0.03855	0.2195	0.8263	0.0947	0.004252	1.088	0.01158	-0.01218	0.006915	461031	383317	77714	UK Biobank
Starchy food consumers	-0.02561	0.1168	-0.2193	0.8264	0.02144	0.01014	1.002	0.007368	0.002721	0.005048	51427	37721	13706	UK Biobank
Diagnoses - main ICD10: G56 Mononeuropathies of upper limb	0.01143	0.05269	0.2169	0.8282	0.01979	0.00202	1.01	0.009329	0.004313	0.006156	361194	353064	8130	UK Biobank
Difficulty concentrating during worst period of anxiety	-0.03112	0.1439	-0.2163	0.8288	0.02259	0.01406	1.005	0.006983	0.00269	0.00549	34879	8479	26400	UK Biobank
Number of things worried about during worst period of anxiety	-0.02393	0.1106	-0.2163	0.8288	0.03962	0.013	0.9831	0.007252	0.000137	0.005628	35558	19915	15643	UK Biobank
Job SOC coding: Authors, writers	0.02842	0.1314	0.2162	0.8288	0.0117	0.005425	0.9859	0.007738	0.009313	0.006697	91149	90836	313	UK Biobank
Non-cancer illness code, self-reported: peripheral vascular disease	0.02472	0.115	0.2149	0.8298	0.00381	0.001469	0.9807	0.008473	0.00058	0.006093	361141	360477	664	UK Biobank
Job SOC coding: Business and related associate professionals n.e.c.	-0.02189	0.102	-0.2148	0.83	0.01542	0.004824	0.9872	0.007023	0.008519	0.00534	91149	89169	1980	UK Biobank
Interferon gamma-induced Protein 10 (IP10)	-0.04303	0.2058	-0.2091	0.8344	0.04958	0.05767	1.008	0.008321	0.003112	0.005792	8293	NA	NA	Young Finns Study (YFS)
FI9 : concept interpolation	-0.01191	0.05719	-0.2083	0.835	0.1639	0.01723	1.003	0.007683	0.0017	0.006129	35147	15446	19701	UK Biobank
Substances taken for depression: Drugs or alcohol (more than once)	0.01498	0.0719	0.2083	0.835	0.02648	0.004619	0.9984	0.007872	0.009203	0.005328	117763	109136	8627	UK Biobank
Ever seen an un-real vision	0.01874	0.09055	0.2069	0.8361	0.01139	0.004374	1.009	0.007191	9.909e-05	0.005325	116787	113019	3768	UK Biobank
Medication for cholesterol, blood pressure or diabetes: Insulin	0.02489	0.121	0.2058	0.8369	0.009971	0.003475	1.009	0.008727	0.001462	0.006086	165340	163092	2248	UK Biobank
Workplace full of chemical or other fumes: Often	-0.0207	0.1006	-0.2057	0.837	0.0174	0.00555	0.9986	0.007303	0.003262	0.005283	88735	82863	5872	UK Biobank
Fractured bone site(s): Wrist	0.01788	0.08884	0.2013	0.8405	0.006354	0.001568	1.008	0.008021	0.00479	0.005371	359241	352041	7200	UK Biobank
Diagnoses - main ICD10: N32 Other disorders of bladder	-0.02184	0.1086	-0.201	0.8407	0.003894	0.001343	1.001	0.007385	0.004091	0.005338	361194	356956	4238	UK Biobank
Age at last live birth	0.00841	0.04201	0.2002	0.8413	0.09291	0.005573	1.024	0.009444	0.005601	0.006147	131806	NA	NA	UK Biobank
Diagnoses - main ICD10: K51 Ulcerative colitis	0.01913	0.09579	0.1997	0.8417	0.006811	0.001706	1.011	0.007967	0.007785	0.006241	361194	359051	2143	UK Biobank
Job coding: heavy goods vehicle (hgv) driver, lorry or truck driver, tanker driver, haulage driver	-0.01933	0.09779	-0.1976	0.8433	0.01932	0.005168	0.9818	0.00658	0.002721	0.0055	89866	89195	671	UK Biobank
Sitting height	0.005105	0.02623	0.1947	0.8457	0.3231	0.01841	1.214	0.04389	-0.01831	0.008322	360066	NA	NA	UK Biobank
Job coding: driving instructor, hgv instructor	0.02803	0.1459	0.1922	0.8476	0.00985	0.006363	0.9893	0.009381	0.005863	0.006644	89866	89742	124	UK Biobank
Medication for cholesterol, blood pressure or diabetes: Cholesterol lowering medication	0.008338	0.04374	0.1906	0.8488	0.06959	0.009548	1.056	0.02569	-0.005447	0.006088	165340	127283	38057	UK Biobank
3mm asymmetry index (left)	-0.02505	0.1319	-0.19	0.8493	0.01599	0.007468	0.9955	0.007295	-0.001651	0.00573	73818	NA	NA	UK Biobank
Diagnoses - main ICD10: S52 Fracture of forearm	0.0166	0.08751	0.1897	0.8495	0.0071	0.001632	1.011	0.007351	-0.00632	0.005814	361194	356114	5080	UK Biobank
Age diabetes diagnosed	0.0296	0.1561	0.1896	0.8496	0.03784	0.03006	1.014	0.00676	-0.005564	0.005594	16166	NA	NA	UK Biobank
Monocyte count	0.008088	0.04272	0.1893	0.8499	0.0944	0.01235	1.178	0.04029	0.008134	0.008069	349856	NA	NA	UK Biobank
Workplace had a lot of diesel exhaust: Often	-0.01939	0.1039	-0.1867	0.8519	0.01673	0.006038	1.004	0.007364	0.0003553	0.005659	89104	85621	3483	UK Biobank
Diagnoses - main ICD10: S42 Fracture of shoulder and upper arm	0.02372	0.1298	0.1827	0.855	0.002606	0.001375	0.9944	0.006949	-0.004763	0.005388	361194	359403	1791	UK Biobank
Diagnoses - main ICD10: I10 Essential (primary) hypertension	0.0199	0.1103	0.1805	0.8568	0.003604	0.001416	0.9945	0.006976	-0.002488	0.005707	361194	360407	787	UK Biobank
FI11 : antonym	0.02193	0.1222	0.1794	0.8576	0.0949	0.04003	0.9964	0.006429	0.009411	0.005743	12493	3550	8943	UK Biobank
Substances taken for anxiety: Drugs or alcohol (more than once)	-0.02056	0.1149	-0.1789	0.858	0.01543	0.004498	1.015	0.007225	0.006716	0.00601	98990	93588	5402	UK Biobank
High light scatter reticulocyte count	-0.005407	0.03022	-0.1789	0.858	0.1432	0.01266	1.181	0.06172	-0.009192	0.007316	344729	NA	NA	UK Biobank
Hair/balding pattern: Pattern 3	0.008781	0.04907	0.179	0.858	0.05926	0.01646	1.012	0.02491	-0.005342	0.005979	165649	121345	44304	UK Biobank
Feelings of worthlessness during worst period of depression	-0.01385	0.0781	-0.1773	0.8593	0.04205	0.008666	1.013	0.007439	0.00467	0.005694	62128	30535	31593	UK Biobank
Activities undertaken to treat depression: Other therapeutic activities such as mindfulness, yoga or art classes	0.01291	0.07461	0.1731	0.8626	0.02946	0.005097	0.9955	0.008614	0.009837	0.006004	117763	108564	9199	UK Biobank
Other and unspecified polyneuropathies, also in other diseases	0.02076	0.1202	0.1727	0.8628	0.003545	0.001316	0.9825	0.006977	-0.002789	0.006018	361194	360815	379	UK Biobank
Non-cancer illness code, self-reported: type 2 diabetes	-0.01614	0.09371	-0.1722	0.8633	0.005679	0.001491	1.018	0.008141	-0.001301	0.005737	361141	358849	2292	UK Biobank
Milk type used: Full cream	0.01125	0.06683	0.1684	0.8663	0.01407	0.001874	1.017	0.008388	0.002676	0.005969	360806	337904	22902	UK Biobank
Vascular/heart problems diagnosed by doctor: Heart attack	0.008959	0.05347	0.1676	0.8669	0.01914	0.001755	1.013	0.008436	-0.00757	0.005664	360420	352132	8288	UK Biobank
Treatment/medication code: furosemide	0.01666	0.09946	0.1675	0.867	0.005108	0.0016	1.008	0.00742	0.002475	0.005782	361141	358427	2714	UK Biobank
Heel bone mineral density (BMD) (right)	0.006656	0.0403	0.1652	0.8688	0.2653	0.03185	1.038	0.02163	-0.004428	0.007021	114552	NA	NA	UK Biobank
Diagnoses - main ICD10: I83 Varicose veins of lower extremities	-0.008448	0.05126	-0.1648	0.8691	0.02191	0.002372	1.038	0.01226	0.001863	0.006017	361194	352431	8763	UK Biobank
IL1b	-0.04809	0.2929	-0.1642	0.8696	0.03053	0.06573	0.9928	0.008578	-0.002917	0.005486	8293	NA	NA	Young Finns Study (YFS)
Treatment/medication code: felodipine	0.01707	0.1041	0.164	0.8698	0.004364	0.00174	1.009	0.008364	-0.005768	0.005356	361141	358051	3090	UK Biobank
Weight, manual entry	-0.03046	0.1863	-0.1635	0.8701	0.09651	0.0979	1.011	0.006679	-0.0002849	0.0054	5278	NA	NA	UK Biobank
Spherical power (right)	0.005781	0.03581	0.1614	0.8717	0.2565	0.0164	1.076	0.01418	0.002272	0.006515	77983	NA	NA	UK Biobank
Gas or solid-fuel cooking/heating: A gas fire that you use regularly in winter time	-0.01323	0.08253	-0.1604	0.8726	0.006905	0.001505	1.03	0.007614	-0.007269	0.005453	360066	214751	145315	UK Biobank
Job coding: biologist, botanist, entomologist, zoologist, ecologist, microbiologist/pathologist/virologist/geneticist (not medically qualified)	0.02045	0.1275	0.1604	0.8726	0.01011	0.005632	0.9903	0.00686	-0.0003281	0.005369	89866	89220	646	UK Biobank
Other/unspecified dorsalgia	0.01874	0.1195	0.1568	0.8754	0.004043	0.00155	1.001	0.007298	0.001402	0.00616	361194	359076	2118	UK Biobank
Sweet snack consumers	-0.01581	0.1011	-0.1563	0.8758	0.03031	0.01077	1.009	0.007863	-0.000706	0.005148	51427	23524	27903	UK Biobank
Treatment/medication code: adcal-d3 1.5g/10micrograms chewable tablet	-0.01706	0.1097	-0.1556	0.8764	0.003388	0.001427	0.9968	0.00653	0.004167	0.005502	361141	358706	2435	UK Biobank
Heel bone mineral density (BMD) T-score, automated (right)	0.006051	0.04017	0.1506	0.8803	0.2622	0.03136	1.039	0.0212	-0.004847	0.006948	114614	NA	NA	UK Biobank
Heel quantitative ultrasound index (QUI), direct entry (right)	0.006044	0.04017	0.1505	0.8804	0.2622	0.03136	1.039	0.0212	-0.004845	0.006948	114614	NA	NA	UK Biobank
Interferon-gamma	-0.08066	0.5447	-0.1481	0.8823	0.02884	0.06363	0.994	0.008133	-0.0004223	0.006167	8293	NA	NA	Young Finns Study (YFS)
Job SOC coding: Driving instructors	0.02029	0.1382	0.1468	0.8833	0.0107	0.006213	0.9902	0.009337	0.004964	0.006467	91149	91021	128	UK Biobank
Diagnoses - main ICD10: C67 Malignant neoplasm of bladder	0.01961	0.1358	0.1444	0.8852	0.002444	0.001451	1.004	0.006785	-0.005239	0.00593	361194	359640	1554	UK Biobank
Pregnancy, childbirth and the puerperium	-0.01693	0.1175	-0.1441	0.8854	0.003032	0.001284	1.007	0.006687	-0.0001725	0.005625	361194	349235	11959	UK Biobank
Mean corpuscular haemoglobin	-0.003729	0.02597	-0.1436	0.8858	0.1623	0.01816	1.184	0.05538	-0.001762	0.006967	350472	NA	NA	UK Biobank
Types of transport used (excluding work): Public transport	-0.00675	0.04724	-0.1429	0.8864	0.0236	0.001992	1.015	0.007998	0.007482	0.005701	359324	251597	107727	UK Biobank
Tea intake	-0.005273	0.03715	-0.1419	0.8871	0.0548	0.002993	1.012	0.01021	0.01157	0.005873	349376	NA	NA	UK Biobank
Worked with paints, thinners or glues: Rarely/never	0.01517	0.1068	0.1419	0.8871	0.0176	0.006128	0.9966	0.007625	0.005195	0.005778	90389	3593	86796	UK Biobank
3mm asymmetry index (right)	0.01755	0.1239	0.1416	0.8874	0.01385	0.006912	1.001	0.007458	0.004294	0.005632	74038	NA	NA	UK Biobank
Types of transport used (excluding work): Walk	0.006084	0.04343	0.1401	0.8886	0.03288	0.00226	1.031	0.009726	0.006129	0.006103	359324	182390	176934	UK Biobank
Olecranon bursitis	-0.01896	0.1365	-0.1389	0.8895	0.002508	0.001251	0.9926	0.007202	0.002	0.005861	361194	360909	285	UK Biobank
How are people in household related to participant: Grandchild	0.01536	0.1126	0.1364	0.8915	0.004027	0.001335	1.002	0.007319	-0.002839	0.005601	358963	356056	2907	UK Biobank
Adhesive capsulitis of shoulder	-0.01608	0.1198	-0.1342	0.8933	0.002941	0.001248	1.003	0.007034	0.002274	0.005715	361194	359996	1198	UK Biobank
Medication for pain relief, constipation, heartburn: Aspirin	-0.006498	0.0491	-0.1323	0.8947	0.02266	0.002064	1.018	0.008766	-0.002521	0.005601	357084	306880	50204	UK Biobank
Diagnoses - main ICD10: C15 Malignant neoplasm of oesophagus	0.01474	0.1154	0.1277	0.8984	0.003502	0.001577	0.9994	0.008203	0.002968	0.006115	361194	360675	519	UK Biobank
Which eye(s) affected by astigmatism: Both eyes	-0.01463	0.116	-0.1261	0.8996	0.1218	0.04824	0.9882	0.006661	-0.002004	0.005181	9749	3045	6704	UK Biobank
Mean corpuscular hemoglobin concentration	-0.005081	0.04029	-0.1261	0.8997	0.08576	0.009886	1.003	0.02082	0.0009554	0.005708	173497	NA	NA	UK Biobank and INTERVAL
Fruit consumers	0.01154	0.09228	0.1251	0.9004	0.0421	0.01071	1.002	0.007243	0.002437	0.005146	51427	9506	41921	UK Biobank
Frequent trouble falling or staying asleep during worst period of anxiety	-0.01126	0.09218	-0.1221	0.9028	0.05429	0.01523	0.987	0.007443	0.001743	0.005118	35584	6455	29129	UK Biobank
Monocyte percentage of white cells	-0.005011	0.0413	-0.1213	0.9034	0.1694	0.0233	1.065	0.03967	0.003122	0.007598	173501	NA	NA	UK Biobank and INTERVAL
Types of physical activity in last 4 weeks: Strenuous sports	0.006066	0.05037	0.1204	0.9041	0.02437	0.001835	1.021	0.007997	0.003676	0.006095	359263	321966	37297	UK Biobank
Types of physical activity in last 4 weeks: Walking for pleasure (not as a means of transport)	-0.00481	0.04015	-0.1198	0.9046	0.036	0.002094	1.042	0.008901	-0.005844	0.005786	359263	100689	258574	UK Biobank
Fractured bone site(s): Leg	-0.01752	0.1463	-0.1198	0.9047	0.001857	0.001329	0.998	0.006749	0.004738	0.005263	359241	356930	2311	UK Biobank
Alcohol drinker status: Never	-0.007771	0.06512	-0.1193	0.905	0.01346	0.001598	1.026	0.007635	0.003432	0.005652	360726	349483	11243	UK Biobank
Illnesses of siblings: Diabetes	-0.006459	0.05486	-0.1177	0.9063	0.02149	0.002188	1.003	0.007923	0.0004246	0.005248	280211	256765	23446	UK Biobank
Diagnoses - main ICD10: C50 Malignant neoplasm of breast	0.008773	0.07451	0.1177	0.9063	0.01022	0.001917	1.017	0.008919	-0.007022	0.00584	361194	352890	8304	UK Biobank
Diagnoses - main ICD10: J47 Bronchiectasis	0.01214	0.1042	0.1165	0.9073	0.004243	0.001638	0.983	0.008551	0.005299	0.005868	361194	360801	393	UK Biobank
Cardiomyopathies, Primary/intrinsic	-0.019	0.1649	-0.1152	0.9083	0.001776	0.00153	0.9973	0.007768	0.0007397	0.005564	361194	360834	360	UK Biobank
Medication for cholesterol, blood pressure, diabetes, or take exogenous hormones: Blood pressure medication	-0.004952	0.04326	-0.1145	0.9089	0.1126	0.006914	1.037	0.01393	-0.00781	0.006837	193148	159629	33519	UK Biobank
Astigmatism angle (left)	0.01302	0.1181	0.1103	0.9122	0.01771	0.007039	1.024	0.007879	-3.027e-05	0.005915	77739	NA	NA	UK Biobank
Diagnoses - main ICD10: K40 Inguinal hernia	0.005774	0.0525	0.11	0.9124	0.02028	0.002381	1.005	0.008428	0.001118	0.005472	361194	348047	13147	UK Biobank
Diagnoses - main ICD10: Z42 Follow-up care involving plastic surgery	0.01107	0.1018	0.1087	0.9134	0.003714	0.001377	1.009	0.006574	0.005167	0.005316	361194	359231	1963	UK Biobank
Type of accommodation lived in: Sheltered accommodation	0.01211	0.1133	0.1069	0.9149	0.00357	0.001499	0.9905	0.008492	-0.005584	0.00557	360088	359229	859	UK Biobank
Never eat eggs, dairy, wheat, sugar: Dairy products	-0.01185	0.1125	-0.1053	0.9161	0.003616	0.001306	1.017	0.007122	0.005089	0.005787	359777	351854	7923	UK Biobank
Treatment/medication code: lisinopril+hydrochlorothiazide 10mg/12.5mg tablet	-0.0128	0.1219	-0.105	0.9164	0.003246	0.001691	0.9909	0.009167	-0.0003401	0.006674	361141	361016	125	UK Biobank
Alcohol consumed	-0.01208	0.1155	-0.1046	0.9167	0.02137	0.0113	1.013	0.00812	0.001142	0.005719	51427	25991	25436	UK Biobank
Spread type: Butter/spreadable butter	-0.004605	0.04423	-0.1041	0.9171	0.04147	0.002623	1.004	0.0118	0.007737	0.005968	360291	229101	131190	UK Biobank
Types of transport used (excluding work): Cycle	0.004739	0.04568	0.1037	0.9174	0.02673	0.001732	1.019	0.007636	0.01076	0.005568	359324	333265	26059	UK Biobank
Lung cancer and mesothelioma	-0.01038	0.1008	-0.1031	0.9179	0.004325	0.001279	0.9995	0.006657	-0.001086	0.005912	361194	359187	2007	UK Biobank
Lung cancer and mesothelioma	-0.01038	0.1008	-0.1031	0.9179	0.004325	0.001279	0.9995	0.006657	-0.001086	0.005912	361194	359187	2007	UK Biobank
Illnesses of father: Heart disease	0.004989	0.04842	0.103	0.9179	0.02944	0.002561	0.9985	0.009765	0.002921	0.006014	318570	214460	104110	UK Biobank
Diseases of appendix	-0.01333	0.1321	-0.1009	0.9196	0.003145	0.001455	1.003	0.007498	0.004084	0.005444	361194	358241	2953	UK Biobank
Monocyte count	0.00408	0.04076	0.1001	0.9203	0.1827	0.02379	1.086	0.03917	0.007786	0.007595	173500	NA	NA	UK Biobank and INTERVAL
Type of fat/oil used in cooking: Olive oil	0.009762	0.09757	0.1001	0.9203	0.0285	0.01003	1.013	0.007033	0.0002089	0.005172	51427	33408	18019	UK Biobank
Difficulty stopping worrying during worst period of anxiety	-0.01194	0.12	-0.09953	0.9207	0.03556	0.01424	0.9962	0.006813	0.003839	0.005629	35523	2057	33466	UK Biobank
Non-cancer illness code, self-reported: pernicious anaemia	0.0112	0.1142	0.09805	0.9219	0.003445	0.001446	0.9927	0.007175	-0.0001361	0.005834	361141	360032	1109	UK Biobank
Hypertensive heart and/or renal disease	0.01423	0.1474	0.0965	0.9231	0.002645	0.001392	0.9849	0.006646	-0.0001268	0.005961	361194	360818	376	UK Biobank
Worked with paints, thinners or glues: Sometimes	0.006609	0.07075	0.09342	0.9256	0.02938	0.005973	1.002	0.007218	-0.001306	0.005119	89003	74908	14095	UK Biobank
COPD related to chronic (opportunist) infections	0.00994	0.1081	0.09196	0.9267	0.00381	0.001563	0.9829	0.008243	0.00673	0.005849	361194	360717	477	UK Biobank
Platelet distribution width	-0.003248	0.03566	-0.09107	0.9274	0.1669	0.02305	0.9991	0.03361	-0.006676	0.007115	173509	NA	NA	UK Biobank and INTERVAL
Diagnoses - main ICD10: D22 Melanocytic naevi	0.01832	0.201	0.09113	0.9274	0.001095	0.001349	1.01	0.007374	-0.004922	0.006003	361194	357693	3501	UK Biobank
Diagnoses - main ICD10: K35 Acute appendicitis	-0.01404	0.1577	-0.08903	0.9291	0.002235	0.001456	1.007	0.007849	0.003603	0.005536	361194	358790	2404	UK Biobank
Treatment/medication code: multivitamin+mineral preparations	-0.01138	0.1287	-0.08842	0.9295	0.002629	0.001314	1.01	0.006827	0.004314	0.005439	361141	356144	4997	UK Biobank
Plateletcrit	-0.00302	0.03548	-0.08511	0.9322	0.1882	0.01632	1.047	0.02828	0.01088	0.006902	173508	NA	NA	UK Biobank and INTERVAL
FI8 : chained arithmetic	0.004116	0.04863	0.08464	0.9325	0.1059	0.008783	1.006	0.007953	0.006058	0.005913	75692	26606	49086	UK Biobank
Detention categories: Informal, not formally detained	0.00719	0.08581	0.08379	0.9332	0.005669	0.001501	1.022	0.008173	0.006318	0.005453	361194	332966	28228	UK Biobank
Diseases of veins, lymphatic vessels and lymph nodes, not elsewhere classified	0.004045	0.05118	0.07904	0.937	0.02172	0.002238	1.038	0.01108	0.002935	0.005867	361194	349327	11867	UK Biobank
Diagnoses - main ICD10: H33 Retinal detachments and breaks	-0.006442	0.08231	-0.07826	0.9376	0.008545	0.001649	1.009	0.007558	0.007017	0.005613	361194	358523	2671	UK Biobank
Ever had prostate specific antigen (PSA) test	-0.004794	0.06201	-0.07731	0.9384	0.02938	0.00362	1.009	0.008048	0.009609	0.005631	158108	108649	49459	UK Biobank
Carpal tunnel syndrome	-0.003985	0.0521	-0.0765	0.939	0.02001	0.001935	1.009	0.009366	0.004063	0.005973	361194	353221	7973	UK Biobank
Treatment/medication code: aspirin	0.003812	0.05146	0.07407	0.941	0.02173	0.001945	1.019	0.008331	-0.002392	0.005863	361141	313060	48081	UK Biobank
Which eye(s) affected by astigmatism: Right eye	0.007012	0.09595	0.07307	0.9417	0.2204	0.05649	0.9792	0.007365	0.005406	0.005441	9749	8298	1451	UK Biobank
Hair colour (natural, before greying): Blonde	-0.002623	0.03675	-0.07139	0.9431	0.08303	0.01648	1.127	0.06656	0.01169	0.007095	360270	319092	41178	UK Biobank
Types of physical activity in last 4 weeks: Heavy DIY (eg: weeding, lawn mowing, carpentry, digging)	0.002835	0.04067	0.0697	0.9444	0.03348	0.002153	1.008	0.008962	0.003949	0.005974	359263	202666	156597	UK Biobank
Polyneuropathies and other disorders of the peripheral nervous system	-0.008847	0.1274	-0.06947	0.9446	0.003154	0.001203	0.9911	0.006878	0.002674	0.005645	361194	360634	560	UK Biobank
Why stopped smoking: Doctor's advice	-0.006462	0.09331	-0.06925	0.9448	0.01972	0.005257	1	0.006618	0.007472	0.005499	88516	82160	6356	UK Biobank
Why stopped smoking: Health precaution	-0.004161	0.06089	-0.06833	0.9455	0.05338	0.006542	1.002	0.007695	0.004945	0.005509	88516	32853	55663	UK Biobank
Type of special diet followed: Low calorie	0.005648	0.08451	0.06683	0.9467	0.03672	0.00994	0.9981	0.007717	-0.001469	0.005308	51427	45350	6077	UK Biobank
Treatment/medication code: telmisartan	0.008404	0.1276	0.06584	0.9475	0.003158	0.001416	0.9929	0.007196	-0.001863	0.006124	361141	360559	582	UK Biobank
Actions taken following self-harm: See anyone from psychiatric or mental health services, including liaison services	-0.006133	0.09535	-0.06432	0.9487	0.01386	0.004285	1.008	0.007345	0.006454	0.005546	117733	116040	1693	UK Biobank
Longest period spent worried or anxious	0.01193	0.1862	0.06405	0.9489	0.02173	0.02131	1.001	0.007836	-0.0001489	0.005758	24738	NA	NA	UK Biobank
Reticulocyte count	-0.002281	0.03709	-0.0615	0.951	0.06756	0.006714	1.062	0.02837	-0.01083	0.006493	344729	NA	NA	UK Biobank
Job SOC coding: Scientific researchers	0.00614	0.107	0.05741	0.9542	0.01546	0.00555	0.998	0.007189	-0.007015	0.005561	91149	89959	1190	UK Biobank
Type milk consumed: wholemilk	-0.0058	0.1048	-0.05535	0.9559	0.03072	0.009888	0.993	0.007225	0.0003428	0.005581	51427	48493	2934	UK Biobank
Signal-to-noise-ratio (SNR) of triplet (right)	-0.004609	0.08619	-0.05347	0.9574	0.01868	0.004451	1.009	0.007034	-0.007092	0.005285	116755	NA	NA	UK Biobank
Hallux rigidus	0.005244	0.1016	0.05161	0.9588	0.005644	0.001479	0.9953	0.007494	0.001535	0.00553	361194	360064	1130	UK Biobank
Diagnoses - main ICD10: R91 Abnormal findings on diagnostic imaging of lung	-0.007064	0.139	-0.05082	0.9595	0.002278	0.00124	0.9878	0.007038	0.006431	0.005579	361194	360064	1130	UK Biobank
Workplace had a lot of cigarette smoke from other people smoking: Often	0.004103	0.08756	0.04686	0.9626	0.02619	0.006419	1.013	0.00805	0.008985	0.005086	89803	74862	14941	UK Biobank
Cheese consumers	0.00545	0.117	0.04658	0.9628	0.02008	0.01001	1.003	0.006663	0.006747	0.005195	51427	28182	23245	UK Biobank
Vitamin and/or mineral supplement use: Glucosamine/chondroitin	0.005546	0.1293	0.0429	0.9658	0.02085	0.009143	0.996	0.006814	0.00752	0.00579	51427	43505	7922	UK Biobank
Transport type for commuting to job workplace: Cycle	-0.002391	0.05825	-0.04105	0.9673	0.03014	0.003303	1.02	0.008361	0.006927	0.005737	190832	175947	14885	UK Biobank
Medication for cholesterol, blood pressure or diabetes: None of the above	-0.001538	0.038	-0.04049	0.9677	0.09766	0.00617	1.057	0.01302	0.004941	0.006248	165340	54968	110372	UK Biobank
Workplace full of chemical or other fumes: Sometimes	0.003445	0.09046	0.03808	0.9696	0.02631	0.005374	1.014	0.007054	0.00698	0.006026	89060	67351	21709	UK Biobank
Pallidum volume	-0.003541	0.09689	-0.03655	0.9708	0.1718	0.04608	0.9778	0.007908	-0.0001667	0.005874	30722	NA	NA	ENIGMA
Knee pain for 3+ months	-0.003017	0.08711	-0.03463	0.9724	0.02833	0.006754	0.9984	0.007171	0.0014	0.005283	76000	16186	59814	UK Biobank
Job SOC coding: Care assistants and home carers	0.004421	0.1322	0.03344	0.9733	0.009382	0.005256	0.9934	0.007193	-0.0007463	0.005178	91149	89977	1172	UK Biobank
Never eat eggs, dairy, wheat, sugar: I eat all of the above	0.00121	0.03632	0.0333	0.9734	0.04711	0.002493	1.018	0.009962	0.001716	0.005618	359777	81615	278162	UK Biobank
Disorders of synovium and tendon	0.003167	0.09583	0.03305	0.9736	0.005332	0.00133	0.9996	0.006462	0.007906	0.005545	361194	355300	5894	UK Biobank
Non-cancer illness code, self-reported: kidney stone/ureter stone/bladder stone	0.002074	0.06597	0.03143	0.9749	0.009009	0.001566	1.003	0.008313	-0.0003998	0.005721	361141	358278	2863	UK Biobank
DVT of lower extremities	-0.00235	0.0758	-0.03101	0.9753	0.008553	0.00171	0.9999	0.009152	0.003994	0.005694	361194	359078	2116	UK Biobank
3mm asymmetry angle (right)	0.00164	0.05491	0.02987	0.9762	0.08104	0.008592	1.011	0.007758	0.005461	0.005772	74038	NA	NA	UK Biobank
Treatment/medication code: perindopril	0.002813	0.09498	0.02961	0.9764	0.005387	0.001584	1.015	0.007099	-0.0008461	0.005651	361141	355984	5157	UK Biobank
Other specified/unspecified soft tissue disorders	0.002765	0.09718	0.02845	0.9773	0.005589	0.001838	0.9928	0.008558	0.005542	0.006123	361194	358264	2930	UK Biobank
Diagnoses - main ICD10: Z03 Medical observation and evaluation for suspected diseases and conditions	0.003533	0.1313	0.02692	0.9785	0.002382	0.001252	1.004	0.006811	0.003198	0.0053	361194	356243	4951	UK Biobank
FI6 : conditional arithmetic	0.00114	0.04321	0.02638	0.979	0.09432	0.006501	1.004	0.008564	0.008584	0.006166	102181	32237	69944	UK Biobank
Job coding: researcher in broadcasting, journalism, photography, printing and publishing	-0.002387	0.1063	-0.02247	0.9821	0.0159	0.005767	0.9731	0.008213	0.000121	0.006153	89866	89704	162	UK Biobank
Illnesses of mother: Alzheimer's disease/dementia	-0.00374	0.1713	-0.02183	0.9826	0.001612	0.004202	1.044	0.03477	0.002136	0.0061	331041	302534	28507	UK Biobank
Treatment/medication code: levothyroxine sodium	-0.001075	0.05099	-0.02107	0.9832	0.0349	0.004479	1.037	0.01408	1.492e-05	0.006788	361141	346452	14689	UK Biobank
Answered sexual history questions	0.0009533	0.04517	0.0211	0.9832	0.02517	0.001815	1.006	0.008318	-0.01096	0.005659	361015	29611	331404	UK Biobank
Gas or solid-fuel cooking/heating: A gas hob or gas cooker	0.002451	0.1274	0.01924	0.9847	0.002636	0.001309	1.01	0.00641	0.00669	0.005375	360066	108386	251680	UK Biobank
Pulse rate, automated reading	0.0005703	0.03136	0.01819	0.9855	0.1439	0.01119	1.079	0.0294	-0.004193	0.007331	340162	NA	NA	UK Biobank
Job coding: scientific researcher, scientific officer, medical research associate, experimental officer	-0.001788	0.1136	-0.01574	0.9874	0.01368	0.005586	0.999	0.007107	-0.006363	0.005599	89866	88701	1165	UK Biobank
Mineral and other dietary supplements: Iron	0.001174	0.08115	0.01446	0.9885	0.006274	0.001406	0.9951	0.007683	0.01295	0.00547	360016	349321	10695	UK Biobank
Weight change during worst episode of depression: Stayed about the same or was on a diet	0.001019	0.0712	0.01431	0.9886	0.06172	0.009272	0.9875	0.007223	0.0002408	0.006013	56571	33590	22981	UK Biobank
Diagnoses - main ICD10: I71 Aortic aneurysm and dissection	0.001487	0.1194	0.01246	0.9901	0.003317	0.001528	1.005	0.007923	-0.007695	0.005675	361194	360630	564	UK Biobank
Workplace had a lot of cigarette smoke from other people smoking: Rarely/never	-0.002004	0.1808	-0.01109	0.9912	0.005983	0.005121	1.015	0.006832	0.005768	0.005275	90716	13422	77294	UK Biobank
Tobacco smoking: Occasionally	0.001306	0.1183	0.01104	0.9912	0.01019	0.004628	0.9981	0.006266	-0.0003481	0.005096	91353	89979	1374	UK Biobank
Bipolar and major depression status: Bipolar I Disorder	0.001018	0.1057	0.009633	0.9923	0.01521	0.005994	1	0.008003	0.005054	0.005627	86895	86339	556	UK Biobank
Gas or solid-fuel cooking/heating: An open solid fuel fire that you use regularly in winter time	0.000409	0.0538	0.007601	0.9939	0.01966	0.001706	1.012	0.007918	0.005621	0.005774	360066	327404	32662	UK Biobank
Diagnoses - main ICD10: T39 Poisoning by nonopioid analgesics, antipyretics and antirheumatics	-0.001003	0.1327	-0.007558	0.994	0.002315	0.001429	1.006	0.007243	0.004813	0.00573	361194	360033	1161	UK Biobank
Diagnoses - main ICD10: D17 Benign lipomatous neoplasm	-0.0008683	0.1225	-0.007086	0.9943	0.002262	0.001344	1.012	0.007126	0.0006297	0.004402	361194	356880	4314	UK Biobank
Medication for cholesterol, blood pressure, diabetes, or take exogenous hormones: Oral contraceptive pill or minipill	-0.0007324	0.1135	-0.006453	0.9949	0.0069	0.002521	0.9874	0.006766	0.0007725	0.005589	193148	188106	5042	UK Biobank
Types of transport used (excluding work): Car/motor vehicle	-4.095e-05	0.04267	-0.0009597	0.9992	0.02777	0.001795	1.006	0.008199	0.007619	0.00582	359324	73865	285459	UK Biobank
Non-cancer illness code, self-reported: heart/cardiac problem	NA	NA	NA	NA	-0.05286	0.09059	1.006	0.006674	0.00468	0.006257	361141	359965	1176	UK Biobank
Non-cancer illness code, self-reported: irregular heart beat	NA	NA	NA	NA	-0.04903	0.2099	1.005	0.006864	-0.001453	0.005503	361141	360576	565	UK Biobank
Cascot confidence score	NA	NA	NA	NA	-0.07426	0.04198	1.006	0.007404	-0.009387	0.005535	10509	NA	NA	UK Biobank
Period spent working mix of day and night shifts	NA	NA	NA	NA	-0.09261	0.06596	1.002	0.006999	-0.006079	0.004991	6708	NA	NA	UK Biobank
Number of night shifts worked monthly during mixed shift periods	NA	NA	NA	NA	-0.01914	0.02575	1.007	0.007733	-0.002218	0.005215	19998	NA	NA	UK Biobank
Age stroke diagnosed	NA	NA	NA	NA	-0.0684	0.08403	0.9966	0.006831	0.008565	0.005253	5339	NA	NA	UK Biobank
Mean signal-to-noise ratio (SNR), (right)	NA	NA	NA	NA	-0.001402	0.004178	1.009	0.007103	0.001954	0.005228	116636	NA	NA	UK Biobank
Longest period of depression	NA	NA	NA	NA	NA	NA	NA	NA	NA	NA	50664	NA	NA	UK Biobank
Longest period of unenthusiasm / disinterest	NA	NA	NA	NA	-0.02305	0.01449	1.012	0.00748	0.008971	0.005329	32165	NA	NA	UK Biobank
Vitamin and/or mineral supplement use: Fish oil	NA	NA	NA	NA	NA	NA	NA	NA	NA	NA	51427	38965	12462	UK Biobank
Illnesses of father: Alzheimer's disease/dementia	NA	NA	NA	NA	NA	NA	NA	NA	NA	NA	312666	297644	15022	UK Biobank
Cutaneous T-cell-attracting chemokine	NA	NA	NA	NA	NA	NA	NA	NA	NA	NA	8293	NA	NA	Young Finns Study (YFS)
Amygdala volume	NA	NA	NA	NA	-0.0309	0.03687	1.005	0.006794	-0.0124	0.005168	30719	NA	NA	ENIGMA
Fibroblast growth factor (FGF-basic)	NA	NA	NA	NA	-0.001258	0.06093	1.01	0.008604	-0.002649	0.006131	8293	NA	NA	Young Finns Study (YFS)
Granulocyte-colony stimulating factor	NA	NA	NA	NA	-0.01105	0.05849	1.012	0.008776	-0.0007498	0.005443	8293	NA	NA	Young Finns Study (YFS)
Growth-Regulated Oncogene-alpha (GROa)	NA	NA	NA	NA	-0.01756	0.05403	0.9968	0.007381	0.001878	0.005912	8293	NA	NA	Young Finns Study (YFS)
Hepatocyte growth factor (HGF)	NA	NA	NA	NA	-0.06373	0.05873	1.01	0.00873	0.0005711	0.005192	8293	NA	NA	Young Finns Study (YFS)
IL12p70	NA	NA	NA	NA	NA	NA	NA	NA	NA	NA	8293	NA	NA	Young Finns Study (YFS)
IL13	NA	NA	NA	NA	-0.04467	0.06991	1.013	0.01278	0.003368	0.00569	8293	NA	NA	Young Finns Study (YFS)
IL16	NA	NA	NA	NA	NA	NA	NA	NA	NA	NA	8293	NA	NA	Young Finns Study (YFS)
IL17	NA	NA	NA	NA	-0.02179	0.06034	1.013	0.0079	-0.002603	0.006054	8293	NA	NA	Young Finns Study (YFS)
IL18	NA	NA	NA	NA	NA	NA	NA	NA	NA	NA	8293	NA	NA	Young Finns Study (YFS)
IL2	NA	NA	NA	NA	-0.04123	0.05375	1.012	0.007539	-0.0002409	0.005329	8293	NA	NA	Young Finns Study (YFS)
IL5	NA	NA	NA	NA	-0.03735	0.05796	1.012	0.008165	-5.388e-05	0.006046	8293	NA	NA	Young Finns Study (YFS)
IL7	NA	NA	NA	NA	-0.007207	0.05885	1.011	0.009167	0.001224	0.006077	8293	NA	NA	Young Finns Study (YFS)
IL8	NA	NA	NA	NA	-0.03769	0.05664	1.01	0.007922	0.001305	0.005992	8293	NA	NA	Young Finns Study (YFS)
IL9	NA	NA	NA	NA	-0.04262	0.05676	1.008	0.008032	-0.006911	0.005572	8293	NA	NA	Young Finns Study (YFS)
Monocyte Chemotactic Protein-3 (MCP3)	NA	NA	NA	NA	-0.07257	0.05449	1.007	0.007479	0.01007	0.006164	8293	NA	NA	Young Finns Study (YFS)
Macrophage Colony-Stimulating Factor (M-CSF)	NA	NA	NA	NA	-0.01014	0.05462	0.9929	0.007295	0.002406	0.005819	8293	NA	NA	Young Finns Study (YFS)
Monokine Induced by gamma (MIG)	NA	NA	NA	NA	-0.08885	0.05933	1.019	0.007978	-0.0001205	0.006234	8293	NA	NA	Young Finns Study (YFS)
Macrophage Inflammatory Protein-1alpha	NA	NA	NA	NA	-0.03868	0.06019	1.006	0.008331	-0.003629	0.005793	8293	NA	NA	Young Finns Study (YFS)
Macrophage Inflammatory Protein-1beta	NA	NA	NA	NA	NA	NA	NA	NA	NA	NA	8293	NA	NA	Young Finns Study (YFS)
Platelet Derived Growth Factor BB	NA	NA	NA	NA	-0.01711	0.06009	1.021	0.01014	-0.009219	0.006195	8293	NA	NA	Young Finns Study (YFS)
Stem Cell Factor	NA	NA	NA	NA	-0.04775	0.05811	1.021	0.008152	0.0005356	0.00547	8293	NA	NA	Young Finns Study (YFS)
Tumor necrosis factor alpha	NA	NA	NA	NA	-0.002018	0.0621	0.9953	0.007908	0.003107	0.005679	8293	NA	NA	Young Finns Study (YFS)
Tumor necrosis factor beta	NA	NA	NA	NA	-0.08004	0.06562	1.011	0.008707	0.01704	0.006367	8293	NA	NA	Young Finns Study (YFS)
TNF-Related Apoptosis-Inducing Ligand	NA	NA	NA	NA	NA	NA	NA	NA	NA	NA	8293	NA	NA	Young Finns Study (YFS)
Vascular Endothelial Growth Factor	NA	NA	NA	NA	NA	NA	NA	NA	NA	NA	8293	NA	NA	Young Finns Study (YFS)

## Sheet: Supplementary Data 7
Supplementary Data 7. Garfield DHS peak enrichment. Enrichment was tested at two GWAS P-value threshold (1x10-8 and 1x10-5, PThresh). The OR and two-sided P-value for enrichment are given in the corresponding columns for each cell type tested (only DHS 'peaks' are reported in the main text).
PThresh	Celltype	OR	P	Beta	SE	CI95_lower	CI95_upper	NAnnotThesh	NAnnot	NThresh	N	linkID	Annotation	Tissue	Type	Category
1e-05	CD4_Primary_Cells	4.48633	7.56e-34	1.50103	0.123772	1.25844	1.74363	179	56602	375	796098	305	UW.CD4_Primary_Cells.ChromatinAccessibility.RO_01689.DS17329.twopass.merge150.wgt10.zgt2.wig	blood	hotspots	Hotspots
1e-08	CD4_Primary_Cells	5.34717	8.15e-15	1.67657	0.215908	1.25339	2.09975	63	56602	119	796098	305	UW.CD4_Primary_Cells.ChromatinAccessibility.RO_01689.DS17329.twopass.merge150.wgt10.zgt2.wig	blood	hotspots	Hotspots
1e-05	Th2	4.19921	1.86e-30	1.4349	0.125097	1.18971	1.68009	154	44089	375	796098	104	hTH2-DS7842.twopass.merge150.wgt10.zgt2.wig	blood	hotspots	Hotspots
1e-08	CD56_Primary_Cells	5.13159	8.9e-14	1.63542	0.219332	1.20552	2.06531	61	50500	119	796098	308	UW.CD56_Primary_Cells.ChromatinAccessibility.RO_01701.DS17443.twopass.merge150.wgt10.zgt2.wig	blood	hotspots	Hotspots
1e-05	CD8_Primary_Cells	4.14581	3.05e-30	1.4221	0.124446	1.17818	1.66601	174	60667	375	796098	309	UW.CD8_Primary_Cells.ChromatinAccessibility.RO_01549.DS16012.twopass.merge150.wgt10.zgt2.wig	blood	hotspots	Hotspots
1e-08	GM12878	4.59215	9.45e-14	1.52435	0.204654	1.12323	1.92547	61	71617	119	796098	923	H3K4me1_gm12878	blood	H3K4me1	Histone_Modifications
1e-05	CD4_Primary_Cells	4.02244	1.32e-28	1.39189	0.125449	1.14601	1.63777	152	44302	375	796098	304	UW.CD4_Primary_Cells.ChromatinAccessibility.RO_01679.DS17212.twopass.merge150.wgt10.zgt2.wig	blood	hotspots	Hotspots
1e-08	CD3_Primary_Cells	5.7581	2.34e-13	1.75061	0.238906	1.28235	2.21886	31	13250	119	796098	601	UW.CD3_Primary_Cells.ChromatinAccessibility.RO_01701.DS17534.hotspot.twopass.fdr0.01.merge.pks.wig	blood	peaks	Peaks
1e-05	GM12878	3.61956	1.3e-27	1.28635	0.118133	1.05481	1.51789	166	71617	375	796098	923	H3K4me1_gm12878	blood	H3K4me1	Histone_Modifications
1e-08	Th2	4.84629	2.55e-13	1.57821	0.215719	1.15541	2.00102	56	44089	119	796098	104	hTH2-DS7842.twopass.merge150.wgt10.zgt2.wig	blood	hotspots	Hotspots
1e-05	CD3_Primary_Cells	3.92343	2.95e-27	1.36697	0.126404	1.11921	1.61472	144	41005	375	796098	301	UW.CD3_Primary_Cells.ChromatinAccessibility.RO_01679.DS17198.twopass.merge150.wgt10.zgt2.wig	blood	hotspots	Hotspots
1e-08	Mobilized_CD4_Primary_Cells	5.77587	3.93e-13	1.75369	0.241619	1.28011	2.22726	29	12091	119	796098	876	UW.Mobilized_CD4_Primary_Cells.ChromatinAccessibility.RO_01701.DS17175.hotspot.twopass.fdr0.01.merge.pks.wig	blood	peaks	Peaks
1e-05	Mobilized_CD56_Primary_Cells	3.73401	1.38e-25	1.31748	0.126003	1.07052	1.56445	170	57729	375	796098	578	UW.Mobilized_CD56_Primary_Cells.ChromatinAccessibility.RO_01689.DS16376.twopass.merge150.wgt10.zgt2.wig	blood	hotspots	Hotspots
1e-08	CD8_Primary_Cells	4.72518	7.73e-13	1.5529	0.216711	1.12815	1.97766	62	60667	119	796098	309	UW.CD8_Primary_Cells.ChromatinAccessibility.RO_01549.DS16012.twopass.merge150.wgt10.zgt2.wig	blood	hotspots	Hotspots
1e-05	Mobilized_CD4_Primary_Cells	3.60355	2.9e-25	1.28192	0.12344	1.03998	1.52386	164	58126	375	796098	576	UW.Mobilized_CD4_Primary_Cells.ChromatinAccessibility.RO_01679.DS16955.twopass.merge150.wgt10.zgt2.wig	blood	hotspots	Hotspots
1e-08	CD4_Primary_Cells	4.65345	1.15e-12	1.53761	0.216211	1.11383	1.96138	54	44302	119	796098	304	UW.CD4_Primary_Cells.ChromatinAccessibility.RO_01679.DS17212.twopass.merge150.wgt10.zgt2.wig	blood	hotspots	Hotspots
1e-05	CD3_Primary_Cells	3.76357	3.93e-25	1.32537	0.127979	1.07453	1.57621	135	37863	375	796098	299	UW.CD3_Primary_Cells.ChromatinAccessibility.CB1_1-3-2011.DS17702.twopass.merge150.wgt10.zgt2.wig	blood	hotspots	Hotspots
1e-08	Mobilized_CD56_Primary_Cells	5.49894	1.19e-12	1.70456	0.239842	1.23447	2.17465	33	13923	119	796098	877	UW.Mobilized_CD56_Primary_Cells.ChromatinAccessibility.RO_01689.DS16376.hotspot.twopass.fdr0.01.merge.pks.wig	blood	peaks	Peaks
1e-05	CD8_Primary_Cells	3.70922	5.71e-25	1.31082	0.127014	1.06187	1.55977	132	36870	375	796098	310	UW.CD8_Primary_Cells.ChromatinAccessibility.RO_01679.DS17203.twopass.merge150.wgt10.zgt2.wig	blood	hotspots	Hotspots
1e-08	CD14_Primary_Cells	4.56173	2.25e-12	1.5177	0.216249	1.09385	1.94155	55	43129	119	796098	293	UW.CD14_Primary_Cells.ChromatinAccessibility.RO_01689.DS17391.twopass.merge150.wgt10.zgt2.wig	blood	hotspots	Hotspots
1e-05	CD3_Primary_Cells	3.52938	2.27e-24	1.26112	0.123798	1.01848	1.50377	164	57396	375	796098	302	UW.CD3_Primary_Cells.ChromatinAccessibility.RO_01701.DS17534.twopass.merge150.wgt10.zgt2.wig	blood	hotspots	Hotspots
1e-08	CD56_Primary_Cells	5.58102	2.68e-12	1.71937	0.245858	1.23749	2.20125	27	10957	119	796098	607	UW.CD56_Primary_Cells.ChromatinAccessibility.RO_01701.DS17443.hotspot.twopass.fdr0.01.merge.pks.wig	blood	peaks	Peaks
1e-05	GM12878	3.38357	1.15e-23	1.21893	0.121555	0.980683	1.45718	159	64126	375	796098	927	H3K4me2_gm12878	blood	H3K4me2	Histone_Modifications
1e-08	CD19_Primary_Cells	5.45998	3.72e-12	1.69745	0.244321	1.21858	2.17631	29	11899	119	796098	596	UW.CD19_Primary_Cells.ChromatinAccessibility.RO_01701.DS17440.hotspot.twopass.fdr0.01.merge.pks.wig	blood	peaks	Peaks
1e-05	Mobilized_CD4_Primary_Cells	3.43986	7.98e-23	1.23543	0.125619	0.989217	1.48165	155	50444	375	796098	577	UW.Mobilized_CD4_Primary_Cells.ChromatinAccessibility.RO_01701.DS17175.twopass.merge150.wgt10.zgt2.wig	blood	hotspots	Hotspots
1e-08	CD8_Primary_Cells	4.3765	9.64e-12	1.47625	0.216719	1.05148	1.90102	49	36870	119	796098	310	UW.CD8_Primary_Cells.ChromatinAccessibility.RO_01679.DS17203.twopass.merge150.wgt10.zgt2.wig	blood	hotspots	Hotspots
1e-05	CD4_Primary_Cells	3.41217	1.42e-22	1.22735	0.125539	0.981293	1.47341	139	43693	375	796098	306	UW.CD4_Primary_Cells.ChromatinAccessibility.RO_01701.DS17881.twopass.merge150.wgt10.zgt2.wig	blood	hotspots	Hotspots
1e-08	CD3_Primary_Cells	4.26401	1.3e-11	1.45021	0.214242	1.0303	1.87012	60	57396	119	796098	302	UW.CD3_Primary_Cells.ChromatinAccessibility.RO_01701.DS17534.twopass.merge150.wgt10.zgt2.wig	blood	hotspots	Hotspots
1e-05	CD56_Primary_Cells	3.42663	2.82e-22	1.23158	0.126878	0.982895	1.48026	155	50500	375	796098	308	UW.CD56_Primary_Cells.ChromatinAccessibility.RO_01701.DS17443.twopass.merge150.wgt10.zgt2.wig	blood	hotspots	Hotspots
1e-08	Mobilized_CD56_Primary_Cells	4.33197	1.98e-11	1.46602	0.218571	1.03762	1.89442	60	57729	119	796098	578	UW.Mobilized_CD56_Primary_Cells.ChromatinAccessibility.RO_01689.DS16376.twopass.merge150.wgt10.zgt2.wig	blood	hotspots	Hotspots
1e-05	GM12878	3.27472	8.97e-22	1.18623	0.123719	0.943742	1.42872	130	48750	375	796098	905	H3K27ac_gm12878	blood	H3K27ac	Histone_Modifications
1e-08	CD14_Primary_Cells	4.30375	2.33e-11	1.45949	0.218368	1.03149	1.88749	51	40237	119	796098	294	UW.CD14_Primary_Cells.ChromatinAccessibility.RO_01701.DS17889.twopass.merge150.wgt10.zgt2.wig	blood	hotspots	Hotspots
1e-05	CD4_Primary_Cells	3.33099	2.41e-21	1.20327	0.126852	0.954641	1.4519	157	55183	375	796098	303	UW.CD4_Primary_Cells.ChromatinAccessibility.RO_01549.DS15947.twopass.merge150.wgt10.zgt2.wig	blood	hotspots	Hotspots
1e-08	CD4_Primary_Cells	5.03191	4.16e-11	1.6158	0.244879	1.13584	2.09576	28	12055	119	796098	605	UW.CD4_Primary_Cells.ChromatinAccessibility.RO_01701.DS17881.hotspot.twopass.fdr0.01.merge.pks.wig	blood	peaks	Peaks
1e-05	CD14_Primary_Cells	3.27643	7.46e-21	1.18675	0.126694	0.938434	1.43507	139	43129	375	796098	293	UW.CD14_Primary_Cells.ChromatinAccessibility.RO_01689.DS17391.twopass.merge150.wgt10.zgt2.wig	blood	hotspots	Hotspots
1e-08	Fetal_Thymus	4.16521	4.78e-11	1.42677	0.21691	1.00162	1.85191	56	55805	119	796098	519	UW.Fetal_Thymus.ChromatinAccessibility.H-23769.DS17323.twopass.merge150.wgt10.zgt2.wig	fetal_thymus	hotspots	Hotspots
1e-05	Fetal_Intestine_Small	3.11153	6.84e-20	1.13512	0.124326	0.891436	1.37879	144	52428	375	796098	361	UW.Fetal_Intestine_Small.ChromatinAccessibility.H-23808.DS17425.twopass.merge150.wgt10.zgt2.wig	fetal_intestine,_small	hotspots	Hotspots
1e-08	Mobilized_CD4_Primary_Cells	4.10781	6.71e-11	1.41289	0.216468	0.988611	1.83717	56	50444	119	796098	577	UW.Mobilized_CD4_Primary_Cells.ChromatinAccessibility.RO_01701.DS17175.twopass.merge150.wgt10.zgt2.wig	blood	hotspots	Hotspots
1e-05	Mobilized_CD8_Primary_Cells	3.08421	3.33e-19	1.12629	0.12574	0.879844	1.37275	149	55163	375	796098	579	UW.Mobilized_CD8_Primary_Cells.ChromatinAccessibility.RO_01679.DS16962.twopass.merge150.wgt10.zgt2.wig	blood	hotspots	Hotspots
1e-08	Mobilized_CD34_Primary_Cells	4.07372	1.13e-10	1.40456	0.217832	0.977606	1.83151	56	51796	119	796098	566	UW.Mobilized_CD34_Primary_Cells.ChromatinAccessibility.RO_01508.DS11202.twopass.merge150.wgt10.zgt2.wig	blood	hotspots	Hotspots
1e-05	CD19_Primary_Cells	3.05896	4.27e-19	1.11807	0.125208	0.872667	1.36348	148	51743	375	796098	295	UW.CD19_Primary_Cells.ChromatinAccessibility.RO_01679.DS17186.twopass.merge150.wgt10.zgt2.wig	blood	hotspots	Hotspots
1e-08	CD14+	3.88235	2.06e-10	1.35644	0.213396	0.938185	1.7747	58	55342	119	796098	52	CD14-DS18065.hg19.twopass.merge150.wgt10.zgt2.wig	blood	hotspots	Hotspots
1e-05	GM12864	3.07854	8.26e-19	1.12446	0.126965	0.875606	1.37331	150	51583	375	796098	58	GM12864-DS12431.twopass.merge150.wgt10.zgt2.wig	blood	hotspots	Hotspots
1e-08	GM06990	3.94935	2.21e-10	1.37355	0.216455	0.9493	1.7978	49	43499	119	796098	57	GM06990-DS7748.twopass.merge150.wgt10.zgt2.wig	blood	hotspots	Hotspots
1e-05	CD56_Primary_Cells	3.13498	1.15e-18	1.14262	0.129555	0.888696	1.39655	122	35744	375	796098	307	UW.CD56_Primary_Cells.ChromatinAccessibility.RO_01679.DS17189.twopass.merge150.wgt10.zgt2.wig	blood	hotspots	Hotspots
1e-08	CD8_Primary_Cells	3.94663	2.58e-10	1.37286	0.217152	0.947244	1.79848	54	50743	119	796098	311	UW.CD8_Primary_Cells.ChromatinAccessibility.RO_01689.DS17332.twopass.merge150.wgt10.zgt2.wig	blood	hotspots	Hotspots
1e-05	CD14_Primary_Cells	3.10775	1.18e-18	1.1339	0.128611	0.881822	1.38598	133	40237	375	796098	294	UW.CD14_Primary_Cells.ChromatinAccessibility.RO_01701.DS17889.twopass.merge150.wgt10.zgt2.wig	blood	hotspots	Hotspots
1e-08	GM12878	3.76328	2.71e-10	1.32529	0.209882	0.913923	1.73666	56	64126	119	796098	927	H3K4me2_gm12878	blood	H3K4me2	Histone_Modifications
1e-05	Mobilized_CD56_Primary_Cells	3.69205	1.54e-18	1.30618	0.148648	1.01483	1.59753	76	13923	375	796098	877	UW.Mobilized_CD56_Primary_Cells.ChromatinAccessibility.RO_01689.DS16376.hotspot.twopass.fdr0.01.merge.pks.wig	blood	peaks	Peaks
1e-08	Fetal_Spleen	3.98388	2.72e-10	1.38226	0.218923	0.953168	1.81135	63	69257	119	796098	504	UW.Fetal_Spleen.ChromatinAccessibility.H-23399.DS17448.twopass.merge150.wgt10.zgt2.wig	fetal_spleen	hotspots	Hotspots
1e-05	Fetal_Thymus	2.96116	3.63e-18	1.08558	0.124925	0.840729	1.33044	159	62358	375	796098	517	UW.Fetal_Thymus.ChromatinAccessibility.H-23589.DS16490.twopass.merge150.wgt10.zgt2.wig	fetal_thymus	hotspots	Hotspots
1e-08	CD19_Primary_Cells	3.8767	3.09e-10	1.35499	0.215274	0.933047	1.77692	51	47458	119	796098	296	UW.CD19_Primary_Cells.ChromatinAccessibility.RO_01689.DS17281.twopass.merge150.wgt10.zgt2.wig	blood	hotspots	Hotspots
1e-05	Mobilized_CD34_Primary_Cells	2.98041	5.02e-18	1.09206	0.126208	0.844695	1.33943	143	50158	375	796098	563	UW.Mobilized_CD34_Primary_Cells.ChromatinAccessibility.RO_01480.DS12771.twopass.merge150.wgt10.zgt2.wig	blood	hotspots	Hotspots
1e-08	CD56_Primary_Cells	3.96187	3.3e-10	1.37672	0.219082	0.947314	1.80612	46	35744	119	796098	307	UW.CD56_Primary_Cells.ChromatinAccessibility.RO_01679.DS17189.twopass.merge150.wgt10.zgt2.wig	blood	hotspots	Hotspots
1e-05	Fetal_Thymus	2.96921	6.6e-18	1.0883	0.126229	0.840887	1.33571	149	55805	375	796098	519	UW.Fetal_Thymus.ChromatinAccessibility.H-23769.DS17323.twopass.merge150.wgt10.zgt2.wig	fetal_thymus	hotspots	Hotspots
1e-08	Mobilized_CD4_Primary_Cells	3.803	4.05e-10	1.33579	0.213658	0.917021	1.75456	57	58126	119	796098	576	UW.Mobilized_CD4_Primary_Cells.ChromatinAccessibility.RO_01679.DS16955.twopass.merge150.wgt10.zgt2.wig	blood	hotspots	Hotspots
1e-05	GM12878	3.43739	7.56e-18	1.23471	0.143469	0.953513	1.51591	80	18883	375	796098	963	seg_ENHANCER_gm12878	blood	ENHANCER	Chromatin_States
1e-08	GM12878	3.73222	4.52e-10	1.317	0.211232	0.902989	1.73102	47	48750	119	796098	905	H3K27ac_gm12878	blood	H3K27ac	Histone_Modifications
1e-05	CD19_Primary_Cells	2.95554	7.89e-18	1.08368	0.125993	0.836736	1.33063	145	51921	375	796098	297	UW.CD19_Primary_Cells.ChromatinAccessibility.RO_01701.DS17440.twopass.merge150.wgt10.zgt2.wig	blood	hotspots	Hotspots
1e-08	CD4_Primary_Cells	3.81692	5.13e-10	1.33944	0.215516	0.917033	1.76186	49	43693	119	796098	306	UW.CD4_Primary_Cells.ChromatinAccessibility.RO_01701.DS17881.twopass.merge150.wgt10.zgt2.wig	blood	hotspots	Hotspots
1e-05	CD8_Primary_Cells	3.02909	9.45e-18	1.10826	0.129161	0.855106	1.36142	118	36454	375	796098	312	UW.CD8_Primary_Cells.ChromatinAccessibility.RO_01701.DS17885.twopass.merge150.wgt10.zgt2.wig	blood	hotspots	Hotspots
1e-08	CD3_Primary_Cells	3.90931	5.91e-10	1.36336	0.220151	0.931866	1.79486	47	37863	119	796098	299	UW.CD3_Primary_Cells.ChromatinAccessibility.CB1_1-3-2011.DS17702.twopass.merge150.wgt10.zgt2.wig	blood	hotspots	Hotspots
1e-05	CD4_Primary_Cells	3.65754	1.46e-17	1.29679	0.152019	0.998835	1.59475	68	12055	375	796098	605	UW.CD4_Primary_Cells.ChromatinAccessibility.RO_01701.DS17881.hotspot.twopass.fdr0.01.merge.pks.wig	blood	peaks	Peaks
1e-08	CD34+	3.73519	7.24e-10	1.3178	0.213901	0.898552	1.73704	60	66312	119	796098	54	CD34-DS16814.hg19.twopass.merge150.wgt10.zgt2.wig	blood	hotspots	Hotspots
1e-05	Mobilized_CD34_Primary_Cells	2.95146	1.56e-17	1.0823	0.126996	0.833389	1.33121	149	51796	375	796098	566	UW.Mobilized_CD34_Primary_Cells.ChromatinAccessibility.RO_01508.DS11202.twopass.merge150.wgt10.zgt2.wig	blood	hotspots	Hotspots
1e-08	CD3_Primary_Cells	3.82267	8.15e-10	1.34095	0.218322	0.913036	1.76886	49	41005	119	796098	301	UW.CD3_Primary_Cells.ChromatinAccessibility.RO_01679.DS17198.twopass.merge150.wgt10.zgt2.wig	blood	hotspots	Hotspots
1e-05	GM06990	2.95155	2.22e-17	1.08233	0.127608	0.83222	1.33244	132	43499	375	796098	57	GM06990-DS7748.twopass.merge150.wgt10.zgt2.wig	blood	hotspots	Hotspots
1e-08	CD4_Primary_Cells	4.62418	8.98e-10	1.5313	0.249941	1.04141	2.02118	26	12541	119	796098	602	UW.CD4_Primary_Cells.ChromatinAccessibility.RO_01549.DS15947.hotspot.twopass.fdr0.01.merge.pks.wig	blood	peaks	Peaks
1e-05	CD19_Primary_Cells	2.9131	2.61e-17	1.06922	0.126346	0.821579	1.31686	136	47458	375	796098	296	UW.CD19_Primary_Cells.ChromatinAccessibility.RO_01689.DS17281.twopass.merge150.wgt10.zgt2.wig	blood	hotspots	Hotspots
1e-08	GM06990	4.6833	1.11e-09	1.544	0.253388	1.04736	2.04064	24	11170	119	796098	181	GM06990-DS7748.hotspot.twopass.fdr0.01.merge.pks.bed	blood	peaks	Peaks
1e-05	Mobilized_CD4_Primary_Cells	3.62946	3.95e-17	1.28908	0.153202	0.988808	1.58936	67	12091	375	796098	876	UW.Mobilized_CD4_Primary_Cells.ChromatinAccessibility.RO_01701.DS17175.hotspot.twopass.fdr0.01.merge.pks.wig	blood	peaks	Peaks
1e-08	CD4_Primary_Cells	3.75168	1.56e-09	1.32221	0.218979	0.893005	1.7514	56	55183	119	796098	303	UW.CD4_Primary_Cells.ChromatinAccessibility.RO_01549.DS15947.twopass.merge150.wgt10.zgt2.wig	blood	hotspots	Hotspots
1e-05	CD4_Primary_Cells	3.54184	1.67e-16	1.26465	0.153407	0.96397	1.56532	67	12541	375	796098	602	UW.CD4_Primary_Cells.ChromatinAccessibility.RO_01549.DS15947.hotspot.twopass.fdr0.01.merge.pks.wig	blood	peaks	Peaks
1e-08	Mobilized_CD34_Primary_Cells	3.66144	1.98e-09	1.29786	0.216325	0.873861	1.72185	52	50158	119	796098	563	UW.Mobilized_CD34_Primary_Cells.ChromatinAccessibility.RO_01480.DS12771.twopass.merge150.wgt10.zgt2.wig	blood	hotspots	Hotspots
1e-05	CD3_Primary_Cells	2.88159	1.91e-16	1.05834	0.128629	0.806228	1.31045	126	40796	375	796098	300	UW.CD3_Primary_Cells.ChromatinAccessibility.CB6_1-4-2011.DS17706.twopass.merge150.wgt10.zgt2.wig	blood	hotspots	Hotspots
1e-08	Fetal_Thymus	3.64387	2.97e-09	1.29305	0.217926	0.865911	1.72018	53	51473	119	796098	521	UW.Fetal_Thymus.ChromatinAccessibility.H-23964.DS17875.twopass.merge150.wgt10.zgt2.wig	fetal_thymus	hotspots	Hotspots
1e-05	CD4_Primary_Cells	3.42566	2e-16	1.23129	0.149752	0.937781	1.52481	72	13923	375	796098	603	UW.CD4_Primary_Cells.ChromatinAccessibility.RO_01679.DS17212.hotspot.twopass.fdr0.01.merge.pks.wig	blood	peaks	Peaks
1e-08	CD14_Primary_Cells	4.33682	4.29e-09	1.46714	0.249824	0.977485	1.9568	27	12344	119	796098	592	UW.CD14_Primary_Cells.ChromatinAccessibility.RO_01689.DS17391.hotspot.twopass.fdr0.01.merge.pks.wig	blood	peaks	Peaks
1e-05	CD19_Primary_Cells	3.54932	2.22e-16	1.26676	0.154299	0.96433	1.56918	65	11899	375	796098	596	UW.CD19_Primary_Cells.ChromatinAccessibility.RO_01701.DS17440.hotspot.twopass.fdr0.01.merge.pks.wig	blood	peaks	Peaks
1e-08	GM12865	3.57944	4.32e-09	1.27521	0.217187	0.849519	1.70089	54	53372	119	796098	59	GM12865-DS12436.twopass.merge150.wgt10.zgt2.wig	blood	hotspots	Hotspots
1e-05	CD3_Primary_Cells	3.45623	2.61e-16	1.24018	0.151423	0.943389	1.53697	71	13250	375	796098	601	UW.CD3_Primary_Cells.ChromatinAccessibility.RO_01701.DS17534.hotspot.twopass.fdr0.01.merge.pks.wig	blood	peaks	Peaks
1e-08	CD19_Primary_Cells	3.53655	4.33e-09	1.26315	0.215153	0.841453	1.68485	54	51743	119	796098	295	UW.CD19_Primary_Cells.ChromatinAccessibility.RO_01679.DS17186.twopass.merge150.wgt10.zgt2.wig	blood	hotspots	Hotspots
1e-05	Mobilized_CD4_Primary_Cells	3.44565	2.61e-16	1.23711	0.151053	0.941051	1.53318	70	13457	375	796098	875	UW.Mobilized_CD4_Primary_Cells.ChromatinAccessibility.RO_01679.DS16955.hotspot.twopass.fdr0.01.merge.pks.wig	blood	peaks	Peaks
1e-08	Mobilized_CD4_Primary_Cells	4.26711	4.97e-09	1.45094	0.248094	0.964672	1.9372	27	13457	119	796098	875	UW.Mobilized_CD4_Primary_Cells.ChromatinAccessibility.RO_01679.DS16955.hotspot.twopass.fdr0.01.merge.pks.wig	blood	peaks	Peaks
1e-05	CD8_Primary_Cells	2.81012	4.31e-16	1.03323	0.127098	0.784115	1.28234	142	50743	375	796098	311	UW.CD8_Primary_Cells.ChromatinAccessibility.RO_01689.DS17332.twopass.merge150.wgt10.zgt2.wig	blood	hotspots	Hotspots
1e-08	Fetal_Intestine_Small	3.48168	5.53e-09	1.24751	0.213969	0.828136	1.66689	51	52428	119	796098	361	UW.Fetal_Intestine_Small.ChromatinAccessibility.H-23808.DS17425.twopass.merge150.wgt10.zgt2.wig	fetal_intestine,_small	hotspots	Hotspots
1e-05	GM12878	2.89656	7.31e-16	1.06352	0.131866	0.805064	1.32198	104	36089	375	796098	943	H3K9ac_gm12878	blood	H3K9ac	Histone_Modifications
1e-08	CD3_Primary_Cells	3.56912	5.58e-09	1.27232	0.218284	0.844483	1.70016	48	40796	119	796098	300	UW.CD3_Primary_Cells.ChromatinAccessibility.CB6_1-4-2011.DS17706.twopass.merge150.wgt10.zgt2.wig	blood	hotspots	Hotspots
1e-05	CD34+	2.70284	8.99e-16	0.994302	0.12367	0.751908	1.2367	157	66312	375	796098	54	CD34-DS16814.hg19.twopass.merge150.wgt10.zgt2.wig	blood	hotspots	Hotspots
1e-08	CD8_Primary_Cells	3.58284	5.64e-09	1.27616	0.219009	0.846898	1.70541	43	36454	119	796098	312	UW.CD8_Primary_Cells.ChromatinAccessibility.RO_01701.DS17885.twopass.merge150.wgt10.zgt2.wig	blood	hotspots	Hotspots
1e-05	CD14+	2.72158	9.91e-16	1.00121	0.124716	0.756769	1.24566	148	55342	375	796098	52	CD14-DS18065.hg19.twopass.merge150.wgt10.zgt2.wig	blood	hotspots	Hotspots
1e-08	Mobilized_CD34_Primary_Cells	4.12117	5.68e-09	1.41614	0.24307	0.93972	1.89255	28	15863	119	796098	870	UW.Mobilized_CD34_Primary_Cells.ChromatinAccessibility.RO_01535.DS14197.hotspot.twopass.fdr0.01.merge.pks.wig	blood	peaks	Peaks
1e-05	GM12878	2.77059	1e-15	1.01906	0.126961	0.770215	1.2679	123	48413	375	796098	933	H3K4me3_gm12878	blood	H3K4me3	Histone_Modifications
1e-08	GM12878	3.97286	7.71e-09	1.37949	0.238885	0.91127	1.8477	30	18883	119	796098	963	seg_ENHANCER_gm12878	blood	ENHANCER	Chromatin_States
1e-05	CD20+	2.71497	1.05e-15	0.998779	0.12453	0.7547	1.24286	148	57476	375	796098	53	CD20-DS17541.hg19.twopass.merge150.wgt10.zgt2.wig	blood	hotspots	Hotspots
1e-08	CD19_Primary_Cells	3.47311	8.61e-09	1.24505	0.216305	0.821094	1.66901	53	51921	119	796098	297	UW.CD19_Primary_Cells.ChromatinAccessibility.RO_01701.DS17440.twopass.merge150.wgt10.zgt2.wig	blood	hotspots	Hotspots
1e-05	Mobilized_CD34_Primary_Cells	2.76859	1.29e-15	1.01834	0.127356	0.76872	1.26796	135	47008	375	796098	564	UW.Mobilized_CD34_Primary_Cells.ChromatinAccessibility.RO_01492.DS12774.twopass.merge150.wgt10.zgt2.wig	blood	hotspots	Hotspots
1e-08	CD8_Primary_Cells	4.35241	1.07e-08	1.47073	0.257168	0.966682	1.97478	24	10967	119	796098	610	UW.CD8_Primary_Cells.ChromatinAccessibility.RO_01689.DS17332.hotspot.twopass.fdr0.01.merge.pks.wig	blood	peaks	Peaks
1e-05	GM12865	2.75677	1.39e-15	1.01406	0.126978	0.765182	1.26294	144	53372	375	796098	59	GM12865-DS12436.twopass.merge150.wgt10.zgt2.wig	blood	hotspots	Hotspots
1e-08	Th2	4.34548	1.15e-08	1.46914	0.257428	0.964577	1.9737	24	10941	119	796098	228	hTH2-DS7842.hotspot.twopass.fdr0.01.merge.pks.bed	blood	peaks	Peaks
1e-05	Mobilized_CD34_Primary_Cells	2.69795	2.57e-15	0.992491	0.125467	0.746576	1.23841	150	59390	375	796098	573	UW.Mobilized_CD34_Primary_Cells.ChromatinAccessibility.RO_01549.DS12734.twopass.merge150.wgt10.zgt2.wig	blood	hotspots	Hotspots
1e-08	Mobilized_CD34_Primary_Cells	3.4118	1.61e-08	1.22724	0.217237	0.801456	1.65302	49	47008	119	796098	564	UW.Mobilized_CD34_Primary_Cells.ChromatinAccessibility.RO_01492.DS12774.twopass.merge150.wgt10.zgt2.wig	blood	hotspots	Hotspots
1e-05	Fetal_Thymus	2.70755	2.72e-15	0.996045	0.126032	0.749023	1.24307	142	54299	375	796098	526	UW.Fetal_Thymus.ChromatinAccessibility.H-24409.DS20341.twopass.merge150.wgt10.zgt2.wig	fetal_thymus	hotspots	Hotspots
1e-08	Mobilized_CD34_Primary_Cells	3.35867	1.89e-08	1.21155	0.215492	0.789181	1.63391	54	58742	119	796098	575	UW.Mobilized_CD34_Primary_Cells.ChromatinAccessibility.RO_01701.DS17112.twopass.merge150.wgt10.zgt2.wig	blood	hotspots	Hotspots
1e-05	HL-60	2.65463	4.73e-15	0.976305	0.124625	0.732041	1.22057	144	58077	375	796098	81	HL60-DS11809.twopass.merge150.wgt10.zgt2.wig	blood	hotspots	Hotspots
1e-08	CD20+	4.09433	1.89e-08	1.4096	0.250745	0.918143	1.90107	25	13023	119	796098	177	CD20-DS17541.hg19.hotspot.twopass.fdr0.01.merge.pks.bed	blood	peaks	Peaks
1e-05	Fetal_Thymus	2.71307	5.16e-15	0.99808	0.127585	0.748013	1.24815	139	51473	375	796098	521	UW.Fetal_Thymus.ChromatinAccessibility.H-23964.DS17875.twopass.merge150.wgt10.zgt2.wig	fetal_thymus	hotspots	Hotspots
1e-08	Fetal_Thymus	3.33654	2.32e-08	1.20493	0.215708	0.782146	1.62772	52	54299	119	796098	526	UW.Fetal_Thymus.ChromatinAccessibility.H-24409.DS20341.twopass.merge150.wgt10.zgt2.wig	fetal_thymus	hotspots	Hotspots
1e-05	CD8_Primary_Cells	3.34481	5.6e-15	1.20741	0.154546	0.9045	1.51032	64	12444	375	796098	609	UW.CD8_Primary_Cells.ChromatinAccessibility.RO_01679.DS17203.hotspot.twopass.fdr0.01.merge.pks.wig	blood	peaks	Peaks
1e-08	CD8_Primary_Cells	4.10831	2.41e-08	1.41301	0.25325	0.916641	1.90938	25	12444	119	796098	609	UW.CD8_Primary_Cells.ChromatinAccessibility.RO_01679.DS17203.hotspot.twopass.fdr0.01.merge.pks.wig	blood	peaks	Peaks
1e-05	Mobilized_CD34_Primary_Cells	2.65795	6.43e-15	0.977555	0.125406	0.731759	1.22335	149	58742	375	796098	575	UW.Mobilized_CD34_Primary_Cells.ChromatinAccessibility.RO_01701.DS17112.twopass.merge150.wgt10.zgt2.wig	blood	hotspots	Hotspots
1e-08	CD20+	3.28136	2.71e-08	1.18826	0.213758	0.769292	1.60722	54	57476	119	796098	53	CD20-DS17541.hg19.twopass.merge150.wgt10.zgt2.wig	blood	hotspots	Hotspots
1e-05	Fetal_Thymus	2.61314	7.16e-15	0.960552	0.123439	0.718611	1.20249	170	79026	375	796098	522	UW.Fetal_Thymus.ChromatinAccessibility.H-23964.DS17876.twopass.merge150.wgt10.zgt2.wig	fetal_thymus	hotspots	Hotspots
1e-08	Mobilized_CD34_Primary_Cells	3.37647	2.96e-08	1.21683	0.219484	0.786642	1.64702	51	50357	119	796098	571	UW.Mobilized_CD34_Primary_Cells.ChromatinAccessibility.RO_01535.DS14197.twopass.merge150.wgt10.zgt2.wig	blood	hotspots	Hotspots
1e-05	CD3_Primary_Cells	3.5209	9.49e-15	1.25872	0.162499	0.940217	1.57722	57	9800	375	796098	598	UW.CD3_Primary_Cells.ChromatinAccessibility.CB1_1-3-2011.DS17702.hotspot.twopass.fdr0.01.merge.pks.wig	blood	peaks	Peaks
1e-08	CD4_Primary_Cells	4.13957	3.17e-08	1.42059	0.256811	0.917242	1.92394	24	11529	119	796098	604	UW.CD4_Primary_Cells.ChromatinAccessibility.RO_01689.DS17329.hotspot.twopass.fdr0.01.merge.pks.wig	blood	peaks	Peaks
1e-05	Fetal_Thymus	2.62721	1.04e-14	0.965923	0.124884	0.721151	1.2107	155	63996	375	796098	518	UW.Fetal_Thymus.ChromatinAccessibility.H-23663.DS16841.twopass.merge150.wgt10.zgt2.wig	fetal_thymus	hotspots	Hotspots
1e-08	CD3_Primary_Cells	4.31041	3.35e-08	1.46103	0.264578	0.942461	1.97961	22	9800	119	796098	598	UW.CD3_Primary_Cells.ChromatinAccessibility.CB1_1-3-2011.DS17702.hotspot.twopass.fdr0.01.merge.pks.wig	blood	peaks	Peaks
1e-05	K562	2.45467	1.3e-14	0.897994	0.116537	0.669582	1.12641	174	111958	375	796098	926	H3K4me1_k562	blood	H3K4me1	Histone_Modifications
1e-08	Fetal_Thymus	3.25963	3.59e-08	1.18161	0.214453	0.761284	1.60194	62	79026	119	796098	522	UW.Fetal_Thymus.ChromatinAccessibility.H-23964.DS17876.twopass.merge150.wgt10.zgt2.wig	fetal_thymus	hotspots	Hotspots
1e-05	CD4_Primary_Cells	3.35528	1.4e-14	1.21053	0.157284	0.902258	1.51881	62	11529	375	796098	604	UW.CD4_Primary_Cells.ChromatinAccessibility.RO_01689.DS17329.hotspot.twopass.fdr0.01.merge.pks.wig	blood	peaks	Peaks
1e-08	Fetal_Thymus	3.25174	4.73e-08	1.17919	0.215929	0.755969	1.60241	57	67554	119	796098	520	UW.Fetal_Thymus.ChromatinAccessibility.H-23833.DS17474.twopass.merge150.wgt10.zgt2.wig	fetal_thymus	hotspots	Hotspots
1e-05	Mobilized_CD34_Primary_Cells	2.6738	1.97e-14	0.983499	0.128514	0.731613	1.23539	136	50357	375	796098	571	UW.Mobilized_CD34_Primary_Cells.ChromatinAccessibility.RO_01535.DS14197.twopass.merge150.wgt10.zgt2.wig	blood	hotspots	Hotspots
1e-08	CD8_Primary_Cells	3.9701	5.5e-08	1.37879	0.253726	0.881489	1.87609	24	12875	119	796098	608	UW.CD8_Primary_Cells.ChromatinAccessibility.RO_01549.DS16012.hotspot.twopass.fdr0.01.merge.pks.wig	blood	peaks	Peaks
1e-05	Fetal_Thymus	2.60155	2.16e-14	0.956109	0.125137	0.710841	1.20138	158	67554	375	796098	520	UW.Fetal_Thymus.ChromatinAccessibility.H-23833.DS17474.twopass.merge150.wgt10.zgt2.wig	fetal_thymus	hotspots	Hotspots
1e-08	Mobilized_CD34_Primary_Cells	3.21788	6.03e-08	1.16872	0.215716	0.74592	1.59153	53	59390	119	796098	573	UW.Mobilized_CD34_Primary_Cells.ChromatinAccessibility.RO_01549.DS12734.twopass.merge150.wgt10.zgt2.wig	blood	hotspots	Hotspots
1e-05	Th1	2.56661	2.86e-14	0.942586	0.123948	0.699649	1.18552	170	77224	375	796098	103	hTH1-all.twopass.merge150.wgt10.zgt2.wig	blood	hotspots	Hotspots
1e-08	CD14_Primary_Cells	3.87286	6.24e-08	1.35399	0.250197	0.863606	1.84438	27	13785	119	796098	593	UW.CD14_Primary_Cells.ChromatinAccessibility.RO_01701.DS17889.hotspot.twopass.fdr0.01.merge.pks.wig	blood	peaks	Peaks
1e-05	HMVEC-LBl	2.62541	3.32e-14	0.965236	0.127252	0.715823	1.21465	140	57004	375	796098	90	HMVEC_LBl-DS13372.twopass.merge150.wgt10.zgt2.wig	blood_vessel	hotspots	Hotspots
1e-08	Mobilized_CD34_Primary_Cells	3.23482	6.53e-08	1.17397	0.217261	0.748142	1.59981	48	49471	119	796098	574	UW.Mobilized_CD34_Primary_Cells.ChromatinAccessibility.RO_01562.DS13196.twopass.merge150.wgt10.zgt2.wig	blood	hotspots	Hotspots
1e-05	CD8_Primary_Cells	3.22821	3.79e-14	1.17193	0.154855	0.868412	1.47544	64	12875	375	796098	608	UW.CD8_Primary_Cells.ChromatinAccessibility.RO_01549.DS16012.hotspot.twopass.fdr0.01.merge.pks.wig	blood	peaks	Peaks
1e-08	Mobilized_CD34_Primary_Cells	3.245	7.77e-08	1.17712	0.219105	0.74767	1.60656	51	53076	119	796098	569	UW.Mobilized_CD34_Primary_Cells.ChromatinAccessibility.RO_01527.DS11666.twopass.merge150.wgt10.zgt2.wig	blood	hotspots	Hotspots
1e-05	Fetal_Intestine_Large	2.66328	4.06e-14	0.979558	0.129588	0.725565	1.23355	120	41584	375	796098	347	UW.Fetal_Intestine_Large.ChromatinAccessibility.H-23855.DS17502.twopass.merge150.wgt10.zgt2.wig	fetal_intestine,_large	hotspots	Hotspots
1e-08	Fetal_Thymus	3.48148	7.81e-08	1.24746	0.232238	0.792272	1.70264	35	23659	119	796098	822	UW.Fetal_Thymus.ChromatinAccessibility.H-24078.DS18382.hotspot.twopass.fdr0.01.merge.pks.wig	fetal_thymus	peaks	Peaks
1e-05	Fetal_Thymus	2.50256	7.29e-14	0.917316	0.122593	0.677033	1.1576	181	92588	375	796098	523	UW.Fetal_Thymus.ChromatinAccessibility.H-24078.DS18382.twopass.merge150.wgt10.zgt2.wig	fetal_thymus	hotspots	Hotspots
1e-08	CD3_Primary_Cells	3.97181	8.11e-08	1.37922	0.257089	0.875327	1.88312	24	12004	119	796098	600	UW.CD3_Primary_Cells.ChromatinAccessibility.RO_01679.DS17198.hotspot.twopass.fdr0.01.merge.pks.wig	blood	peaks	Peaks
1e-05	CD3_Primary_Cells	3.21656	1.17e-13	1.16831	0.15745	0.859712	1.47691	62	12004	375	796098	600	UW.CD3_Primary_Cells.ChromatinAccessibility.RO_01679.DS17198.hotspot.twopass.fdr0.01.merge.pks.wig	blood	peaks	Peaks
1e-08	Mobilized_CD8_Primary_Cells	3.20277	8.12e-08	1.16402	0.216988	0.738718	1.58931	51	55163	119	796098	579	UW.Mobilized_CD8_Primary_Cells.ChromatinAccessibility.RO_01679.DS16962.twopass.merge150.wgt10.zgt2.wig	blood	hotspots	Hotspots
1e-05	GM12878	2.58647	1.21e-13	0.950294	0.12814	0.69914	1.20145	118	46215	375	796098	902	H2AFZ_gm12878	blood	H2AFZ	Histone_Modifications
1e-08	CD4_Primary_Cells	3.80991	9.53e-08	1.3376	0.250701	0.846232	1.82898	26	13923	119	796098	603	UW.CD4_Primary_Cells.ChromatinAccessibility.RO_01679.DS17212.hotspot.twopass.fdr0.01.merge.pks.wig	blood	peaks	Peaks
1e-05	CD8_Primary_Cells	3.27796	1.27e-13	1.18722	0.160241	0.87315	1.50129	60	10967	375	796098	610	UW.CD8_Primary_Cells.ChromatinAccessibility.RO_01689.DS17332.hotspot.twopass.fdr0.01.merge.pks.wig	blood	peaks	Peaks
1e-08	GM12865	4.09411	9.61e-08	1.40955	0.264255	0.891608	1.92749	23	10104	119	796098	8	GM12865_footprints.txt	blood	footprints	Footprints
1e-05	Mobilized_CD34_Primary_Cells	2.54793	2.8e-13	0.935282	0.128057	0.684289	1.18627	136	50998	375	796098	565	UW.Mobilized_CD34_Primary_Cells.ChromatinAccessibility.RO_01492.DS14206.twopass.merge150.wgt10.zgt2.wig	blood	hotspots	Hotspots
1e-08	GM12878	3.27221	1.08e-07	1.18546	0.223154	0.748082	1.62285	38	36089	119	796098	943	H3K9ac_gm12878	blood	H3K9ac	Histone_Modifications
1e-05	Mobilized_CD34_Primary_Cells	2.51802	3.71e-13	0.923474	0.127098	0.674363	1.17258	136	52013	375	796098	568	UW.Mobilized_CD34_Primary_Cells.ChromatinAccessibility.RO_01520.DS12785.twopass.merge150.wgt10.zgt2.wig	blood	hotspots	Hotspots
1e-08	GM12878	3.15309	1.09e-07	1.14838	0.216258	0.724516	1.57225	44	48413	119	796098	933	H3K4me3_gm12878	blood	H3K4me3	Histone_Modifications
1e-05	GM12878	2.83477	3.83e-13	1.04196	0.143492	0.760718	1.32321	86	20362	375	796098	184	GM12878-all.fdr0.01.bed	blood	peaks	Peaks
1e-08	Mobilized_CD34_Primary_Cells	3.15656	1.44e-07	1.14948	0.218549	0.721128	1.57784	50	50998	119	796098	565	UW.Mobilized_CD34_Primary_Cells.ChromatinAccessibility.RO_01492.DS14206.twopass.merge150.wgt10.zgt2.wig	blood	hotspots	Hotspots
1e-05	GM12878	0.449551	6.93e-13	-0.79951	0.111338	-1.01773	-0.58128	219	617927	375	796098	975	seg_REPRESSED_gm12878	blood	REPRESSED	Chromatin_States
1e-08	GM12864	3.14784	1.62e-07	1.14672	0.2189	0.717674	1.57576	51	51583	119	796098	58	GM12864-DS12431.twopass.merge150.wgt10.zgt2.wig	blood	hotspots	Hotspots
1e-05	Mobilized_CD34_Primary_Cells	2.49555	1.01e-12	0.914509	0.12829	0.663062	1.16596	138	53076	375	796098	569	UW.Mobilized_CD34_Primary_Cells.ChromatinAccessibility.RO_01527.DS11666.twopass.merge150.wgt10.zgt2.wig	blood	hotspots	Hotspots
1e-08	CD3_Primary_Cells	3.87433	1.84e-07	1.35437	0.259703	0.845354	1.86339	22	11383	119	796098	599	UW.CD3_Primary_Cells.ChromatinAccessibility.CB6_1-4-2011.DS17706.hotspot.twopass.fdr0.01.merge.pks.wig	blood	peaks	Peaks
1e-05	GM12878	2.43061	1.08e-12	0.888143	0.124731	0.64367	1.13262	109	70943	375	796098	917	H3K36me3_gm12878	blood	H3K36me3	Histone_Modifications
1e-08	Mobilized_CD34_Primary_Cells	3.12648	1.86e-07	1.13991	0.218691	0.711274	1.56854	48	51249	119	796098	562	UW.Mobilized_CD34_Primary_Cells.ChromatinAccessibility.RO_00738.DS13199.twopass.merge150.wgt10.zgt2.wig	blood	hotspots	Hotspots
1e-05	Fetal_Thymus	2.47014	1.45e-12	0.904275	0.127737	0.65391	1.15464	134	52188	375	796098	525	UW.Fetal_Thymus.ChromatinAccessibility.H-24401.DS20335.twopass.merge150.wgt10.zgt2.wig	fetal_thymus	hotspots	Hotspots
1e-08	Fetal_Thymus	3.5497	2e-07	1.26686	0.243679	0.789252	1.74447	29	17475	119	796098	816	UW.Fetal_Thymus.ChromatinAccessibility.H-23589.DS16490.hotspot.twopass.fdr0.01.merge.pks.wig	fetal_thymus	peaks	Peaks
1e-05	Mobilized_CD34_Primary_Cells	2.50456	1.63e-12	0.918115	0.129986	0.663342	1.17289	129	47822	375	796098	567	UW.Mobilized_CD34_Primary_Cells.ChromatinAccessibility.RO_01517.DS14129.twopass.merge150.wgt10.zgt2.wig	blood	hotspots	Hotspots
1e-08	GM12878	3.21426	2.56e-07	1.1676	0.226571	0.723517	1.61168	40	33811	119	796098	999	tfbs_gm12878	blood	tfbs	TFBS
1e-05	CD8_Primary_Cells	3.08359	1.82e-12	1.1261	0.15978	0.812926	1.43926	59	11441	375	796098	611	UW.CD8_Primary_Cells.ChromatinAccessibility.RO_01701.DS17885.hotspot.twopass.fdr0.01.merge.pks.wig	blood	peaks	Peaks
1e-08	Fetal_Spleen	3.35683	3.25e-07	1.211	0.237069	0.746341	1.67565	31	22835	119	796098	803	UW.Fetal_Spleen.ChromatinAccessibility.H-23399.DS17448.hotspot.twopass.fdr0.01.merge.pks.wig	fetal_spleen	peaks	Peaks
1e-05	CD20+	2.98413	2.71e-12	1.09331	0.156371	0.786823	1.3998	61	13023	375	796098	177	CD20-DS17541.hg19.hotspot.twopass.fdr0.01.merge.pks.bed	blood	peaks	Peaks
1e-08	Mobilized_CD34_Primary_Cells	3.07732	3.84e-07	1.12406	0.221424	0.690068	1.55805	47	47822	119	796098	567	UW.Mobilized_CD34_Primary_Cells.ChromatinAccessibility.RO_01517.DS14129.twopass.merge150.wgt10.zgt2.wig	blood	hotspots	Hotspots
1e-05	Fetal_Thymus	2.82347	2.83e-12	1.03797	0.148583	0.746743	1.32919	74	17475	375	796098	816	UW.Fetal_Thymus.ChromatinAccessibility.H-23589.DS16490.hotspot.twopass.fdr0.01.merge.pks.wig	fetal_thymus	peaks	Peaks
1e-08	Mobilized_CD34_Primary_Cells	2.98306	5.34e-07	1.09295	0.217992	0.665686	1.52022	46	48555	119	796098	570	UW.Mobilized_CD34_Primary_Cells.ChromatinAccessibility.RO_01535.DS12274.twopass.merge150.wgt10.zgt2.wig	blood	hotspots	Hotspots
1e-05	Th2	3.09225	3.61e-12	1.1289	0.162389	0.810616	1.44718	58	10941	375	796098	228	hTH2-DS7842.hotspot.twopass.fdr0.01.merge.pks.bed	blood	peaks	Peaks
1e-08	Fetal_Thymus	2.94371	5.75e-07	1.07967	0.215963	0.656383	1.50296	53	62358	119	796098	517	UW.Fetal_Thymus.ChromatinAccessibility.H-23589.DS16490.twopass.merge150.wgt10.zgt2.wig	fetal_thymus	hotspots	Hotspots
1e-05	GM12878	2.45916	5.63e-12	0.899819	0.13062	0.643804	1.15583	95	51583	375	796098	939	H3K79me2_gm12878	blood	H3K79me2	Histone_Modifications
1e-08	Fetal_Thymus	2.88422	7.13e-07	1.05926	0.213649	0.640503	1.47801	63	92588	119	796098	523	UW.Fetal_Thymus.ChromatinAccessibility.H-24078.DS18382.twopass.merge150.wgt10.zgt2.wig	fetal_thymus	hotspots	Hotspots
1e-05	Mobilized_CD34_Primary_Cells	2.41717	5.64e-12	0.882599	0.128129	0.631466	1.13373	128	49471	375	796098	574	UW.Mobilized_CD34_Primary_Cells.ChromatinAccessibility.RO_01562.DS13196.twopass.merge150.wgt10.zgt2.wig	blood	hotspots	Hotspots
1e-08	Mobilized_CD34_Primary_Cells	3.31265	7.13e-07	1.19775	0.24159	0.724233	1.67127	28	19219	119	796098	867	UW.Mobilized_CD34_Primary_Cells.ChromatinAccessibility.RO_01520.DS12785.hotspot.twopass.fdr0.01.merge.pks.wig	blood	peaks	Peaks
1e-05	Fetal_Thymus	2.64313	6.22e-12	0.971962	0.141387	0.694844	1.24908	88	23659	375	796098	822	UW.Fetal_Thymus.ChromatinAccessibility.H-24078.DS18382.hotspot.twopass.fdr0.01.merge.pks.wig	fetal_thymus	peaks	Peaks
1e-08	HL-60	3.32516	7.98e-07	1.20152	0.243423	0.724408	1.67863	29	18500	119	796098	205	HL60-DS11809.hotspot.twopass.fdr0.01.merge.pks.bed	blood	peaks	Peaks
1e-05	GM12878	2.53002	6.43e-12	0.928226	0.135118	0.663395	1.19306	107	33811	375	796098	999	tfbs_gm12878	blood	tfbs	TFBS
1e-08	Mobilized_CD34_Primary_Cells	2.93033	8.17e-07	1.07512	0.218022	0.647793	1.50244	47	49422	119	796098	572	UW.Mobilized_CD34_Primary_Cells.ChromatinAccessibility.RO_01536.DS12339.twopass.merge150.wgt10.zgt2.wig	blood	hotspots	Hotspots
1e-05	Mobilized_CD34_Primary_Cells	2.41322	6.48e-12	0.880963	0.12826	0.629573	1.13235	126	48555	375	796098	570	UW.Mobilized_CD34_Primary_Cells.ChromatinAccessibility.RO_01535.DS12274.twopass.merge150.wgt10.zgt2.wig	blood	hotspots	Hotspots
1e-08	Mobilized_CD34_Primary_Cells	2.91587	8.47e-07	1.07017	0.217332	0.644198	1.49614	48	52013	119	796098	568	UW.Mobilized_CD34_Primary_Cells.ChromatinAccessibility.RO_01520.DS12785.twopass.merge150.wgt10.zgt2.wig	blood	hotspots	Hotspots
1e-05	CD56_Primary_Cells	2.94322	7.18e-12	1.0795	0.157501	0.770804	1.38821	61	12705	375	796098	606	UW.CD56_Primary_Cells.ChromatinAccessibility.RO_01679.DS17189.hotspot.twopass.fdr0.01.merge.pks.wig	blood	peaks	Peaks
1e-08	CD34+	3.63509	9.74e-07	1.29063	0.26357	0.774037	1.80723	21	11475	119	796098	3	CD34+_Mobilized_footprints.txt	blood	footprints	Footprints
1e-05	CD14_Primary_Cells	2.94761	9.11e-12	1.08099	0.158504	0.770326	1.39166	61	12344	375	796098	592	UW.CD14_Primary_Cells.ChromatinAccessibility.RO_01689.DS17391.hotspot.twopass.fdr0.01.merge.pks.wig	blood	peaks	Peaks
1e-08	CD8_Primary_Cells	3.58211	1.27e-06	1.27595	0.263386	0.759715	1.79219	22	11441	119	796098	611	UW.CD8_Primary_Cells.ChromatinAccessibility.RO_01701.DS17885.hotspot.twopass.fdr0.01.merge.pks.wig	blood	peaks	Peaks
1e-05	CD56_Primary_Cells	3.012	1.35e-11	1.1026	0.16304	0.783043	1.42216	56	10957	375	796098	607	UW.CD56_Primary_Cells.ChromatinAccessibility.RO_01701.DS17443.hotspot.twopass.fdr0.01.merge.pks.wig	blood	peaks	Peaks
1e-08	Fetal_Intestine_Large	2.91599	1.32e-06	1.07021	0.221281	0.636496	1.50392	43	41584	119	796098	347	UW.Fetal_Intestine_Large.ChromatinAccessibility.H-23855.DS17502.twopass.merge150.wgt10.zgt2.wig	fetal_intestine,_large	hotspots	Hotspots
1e-05	Fetal_Spleen	2.34375	1.63e-11	0.851752	0.126457	0.603896	1.09961	156	69257	375	796098	504	UW.Fetal_Spleen.ChromatinAccessibility.H-23399.DS17448.twopass.merge150.wgt10.zgt2.wig	fetal_spleen	hotspots	Hotspots
1e-08	CMK	2.85348	1.45e-06	1.04854	0.217648	0.62195	1.47513	44	49927	119	796098	55	CMK-DS12393.twopass.merge150.wgt10.zgt2.wig	blood	hotspots	Hotspots
1e-05	CMK	2.36298	1.95e-11	0.859923	0.128167	0.608715	1.11113	120	49927	375	796098	55	CMK-DS12393.twopass.merge150.wgt10.zgt2.wig	blood	hotspots	Hotspots
1e-08	GM12878	2.80777	2.4e-06	1.03239	0.218881	0.603383	1.4614	40	46215	119	796098	902	H2AFZ_gm12878	blood	H2AFZ	Histone_Modifications
1e-05	Jurkat	2.33974	2.54e-11	0.850042	0.127422	0.600294	1.09979	137	58279	375	796098	109	Jurkat-DS12659.twopass.merge150.wgt10.zgt2.wig	blood	hotspots	Hotspots
1e-08	Jurkat	2.78897	2.5e-06	1.02567	0.217855	0.598677	1.45267	47	58279	119	796098	109	Jurkat-DS12659.twopass.merge150.wgt10.zgt2.wig	blood	hotspots	Hotspots
1e-05	Th1	2.43058	3.33e-11	0.888131	0.133929	0.625631	1.15063	106	34442	375	796098	227	hTH1-all.fdr0.01.bed	blood	peaks	Peaks
1e-08	GM12878	3.40772	2.51e-06	1.22604	0.260459	0.715543	1.73654	23	13786	119	796098	896	FAIRE_gm12878	blood	faire	FAIRE
1e-05	GM18507	2.31328	3.57e-11	0.838666	0.126671	0.590391	1.08694	145	59896	375	796098	138	wgEncodeOpenChromDnaseGm18507AlnAllReps.30000000.twopass.merge150.wgt10.zgt2.wig	blood	hotspots	Hotspots
1e-08	HMVEC-LBl	2.78359	2.93e-06	1.02374	0.218949	0.594601	1.45288	48	57004	119	796098	90	HMVEC_LBl-DS13372.twopass.merge150.wgt10.zgt2.wig	blood_vessel	hotspots	Hotspots
1e-05	Mobilized_CD34_Primary_Cells	2.74789	3.79e-11	1.01083	0.152881	0.711187	1.31048	66	15863	375	796098	870	UW.Mobilized_CD34_Primary_Cells.ChromatinAccessibility.RO_01535.DS14197.hotspot.twopass.fdr0.01.merge.pks.wig	blood	peaks	Peaks
1e-08	Th1	4.02042	2.99e-06	1.39139	0.297826	0.807648	1.97513	16	6422	119	796098	40	Th1_footprints.txt	blood	footprints	Footprints
1e-05	K562	2.27165	4.74e-11	0.820506	0.124719	0.576056	1.06496	179	92993	375	796098	110	K562-all.twopass.merge150.wgt10.zgt2.wig	blood	hotspots	Hotspots
1e-08	Adult_CD4+	2.69244	3.64e-06	0.990449	0.213887	0.571229	1.40967	61	87945	119	796098	42	Adult_Th0_AllReps.30000000.twopass.merge150.wgt10.zgt2.wig	blood	hotspots	Hotspots
1e-05	GM12878	2.67179	5.98e-11	0.982748	0.150172	0.688412	1.27708	70	19311	375	796098	987	seg_TSS_gm12878	blood	TSS	Chromatin_States
1e-08	Mobilized_CD34_Primary_Cells	3.13171	3.87e-06	1.14158	0.247184	0.657098	1.62606	26	18289	119	796098	868	UW.Mobilized_CD34_Primary_Cells.ChromatinAccessibility.RO_01527.DS11666.hotspot.twopass.fdr0.01.merge.pks.wig	blood	peaks	Peaks
1e-05	CD14_Primary_Cells	2.75809	1.01e-10	1.01454	0.156904	0.707007	1.32207	63	13785	375	796098	593	UW.CD14_Primary_Cells.ChromatinAccessibility.RO_01701.DS17889.hotspot.twopass.fdr0.01.merge.pks.wig	blood	peaks	Peaks
1e-08	GM19238	3.10512	3.95e-06	1.13305	0.245571	0.651734	1.61437	28	18013	119	796098	264	wgEncodeOpenChromDnaseGm19238AlnAllReps.30000000.hotspot.twopass.fdr0.01.merge.pks.bed	blood	peaks	Peaks
1e-05	GM06990	2.89552	1.2e-10	1.06317	0.165102	0.739566	1.38677	52	11170	375	796098	181	GM06990-DS7748.hotspot.twopass.fdr0.01.merge.pks.bed	blood	peaks	Peaks
1e-08	GM12878	3.05561	4.07e-06	1.11698	0.242416	0.641843	1.59211	29	20362	119	796098	184	GM12878-all.fdr0.01.bed	blood	peaks	Peaks
1e-05	GM12891	2.61949	1.22e-10	0.96298	0.1496	0.669763	1.2562	67	17821	375	796098	261	wgEncodeOpenChromDnaseGm12891AlnAllReps.30000000.hotspot.twopass.fdr0.01.merge.pks.bed	blood	peaks	Peaks
1e-08	HL-60	2.68724	4.26e-06	0.988516	0.214968	0.567179	1.40985	48	58077	119	796098	81	HL60-DS11809.twopass.merge150.wgt10.zgt2.wig	blood	hotspots	Hotspots
1e-05	NB4	2.27393	1.41e-10	0.821508	0.128059	0.570513	1.0725	130	54093	375	796098	113	NB4-DS12543.twopass.merge150.wgt10.zgt2.wig	blood	hotspots	Hotspots
1e-08	K562	2.51557	5.23e-06	0.9225	0.202503	0.525594	1.3194	58	111958	119	796098	926	H3K4me1_k562	blood	H3K4me1	Histone_Modifications
1e-05	Fetal_Thymus	2.66556	1.56e-10	0.980416	0.153207	0.680129	1.2807	69	16097	375	796098	819	UW.Fetal_Thymus.ChromatinAccessibility.H-23833.DS17474.hotspot.twopass.fdr0.01.merge.pks.wig	fetal_thymus	peaks	Peaks
1e-08	GM19238	2.6256	5.72e-06	0.96531	0.212787	0.548247	1.38237	56	77555	119	796098	139	wgEncodeOpenChromDnaseGm19238AlnAllReps.30000000.twopass.merge150.wgt10.zgt2.wig	blood	hotspots	Hotspots
1e-05	GM12892	2.15744	1.66e-10	0.768922	0.120336	0.533063	1.00478	159	85496	375	796098	137	wgEncodeOpenChromDnaseGm12892AlnAllReps.30000000.twopass.merge150.wgt10.zgt2.wig	blood	hotspots	Hotspots
1e-08	Mobilized_CD34_Primary_Cells	3.04052	6.15e-06	1.11203	0.245959	0.629951	1.59411	26	18702	119	796098	863	UW.Mobilized_CD34_Primary_Cells.ChromatinAccessibility.RO_01492.DS12774.hotspot.twopass.fdr0.01.merge.pks.wig	blood	peaks	Peaks
1e-05	NHEK	2.23585	1.67e-10	0.804623	0.125936	0.557789	1.05146	177	91134	375	796098	117	NHEK-all.twopass.merge150.wgt10.zgt2.wig	skin	hotspots	Hotspots
1e-08	CD56_Primary_Cells	3.26283	6.66e-06	1.18259	0.262551	0.667994	1.69719	22	12705	119	796098	606	UW.CD56_Primary_Cells.ChromatinAccessibility.RO_01679.DS17189.hotspot.twopass.fdr0.01.merge.pks.wig	blood	peaks	Peaks
1e-05	Th1	3.26001	2.12e-10	1.18173	0.186036	0.8171	1.54636	40	6422	375	796098	40	Th1_footprints.txt	blood	footprints	Footprints
1e-08	Adult_CD4+	2.88864	7.32e-06	1.06079	0.236563	0.597123	1.52445	32	24073	119	796098	167	Adult_Th0_AllReps.30000000.hotspot.twopass.fdr0.01.merge.pks.bed	blood	peaks	Peaks
1e-05	Fetal_Spleen	2.5031	2.14e-10	0.917528	0.144473	0.634361	1.2007	81	22835	375	796098	803	UW.Fetal_Spleen.ChromatinAccessibility.H-23399.DS17448.hotspot.twopass.fdr0.01.merge.pks.wig	fetal_spleen	peaks	Peaks
1e-08	GM18507	2.63191	8.63e-06	0.967711	0.21751	0.541391	1.39403	50	59896	119	796098	138	wgEncodeOpenChromDnaseGm18507AlnAllReps.30000000.twopass.merge150.wgt10.zgt2.wig	blood	hotspots	Hotspots
1e-05	Mobilized_CD34_Primary_Cells	2.25507	2.7e-10	0.813181	0.128766	0.5608	1.06556	126	49422	375	796098	572	UW.Mobilized_CD34_Primary_Cells.ChromatinAccessibility.RO_01536.DS12339.twopass.merge150.wgt10.zgt2.wig	blood	hotspots	Hotspots
1e-08	CD19_Primary_Cells	3.2291	8.9e-06	1.1722	0.263872	0.655016	1.68939	22	12694	119	796098	594	UW.CD19_Primary_Cells.ChromatinAccessibility.RO_01679.DS17186.hotspot.twopass.fdr0.01.merge.pks.wig	blood	peaks	Peaks
1e-05	Fetal_Thymus	2.66128	2.85e-10	0.978806	0.155204	0.674607	1.283	65	15530	375	796098	818	UW.Fetal_Thymus.ChromatinAccessibility.H-23769.DS17323.hotspot.twopass.fdr0.01.merge.pks.wig	fetal_thymus	peaks	Peaks
1e-08	Fetal_Thymus	3.11486	1.14e-05	1.13619	0.258861	0.628818	1.64355	24	14807	119	796098	824	UW.Fetal_Thymus.ChromatinAccessibility.H-24401.DS20335.hotspot.twopass.fdr0.01.merge.pks.wig	fetal_thymus	peaks	Peaks
1e-05	CD3_Primary_Cells	2.80522	3.19e-10	1.03148	0.164012	0.710017	1.35294	54	11383	375	796098	599	UW.CD3_Primary_Cells.ChromatinAccessibility.CB6_1-4-2011.DS17706.hotspot.twopass.fdr0.01.merge.pks.wig	blood	peaks	Peaks
1e-08	Fetal_Thymus	2.61068	1.21e-05	0.959609	0.219297	0.529787	1.38943	46	52188	119	796098	525	UW.Fetal_Thymus.ChromatinAccessibility.H-24401.DS20335.twopass.merge150.wgt10.zgt2.wig	fetal_thymus	hotspots	Hotspots
1e-05	Fetal_Thymus	2.50799	3.31e-10	0.919482	0.146337	0.632662	1.2063	79	20987	375	796098	821	UW.Fetal_Thymus.ChromatinAccessibility.H-23964.DS17876.hotspot.twopass.fdr0.01.merge.pks.wig	fetal_thymus	peaks	Peaks
1e-08	AG04449	2.65725	1.21e-05	0.97729	0.223376	0.539472	1.41511	44	51574	119	796098	43	AG04449-DS12319.twopass.merge150.wgt10.zgt2.wig	skin	hotspots	Hotspots
1e-05	Breast_vHMEC	2.25274	3.74e-10	0.812146	0.129646	0.558039	1.06625	131	56721	375	796098	292	UW.Breast_vHMEC.ChromatinAccessibility.RM035.DS18438.twopass.merge150.wgt10.zgt2.wig	breast	hotspots	Hotspots
1e-08	GM12878	2.56978	1.22e-05	0.94382	0.215762	0.520927	1.36671	58	82833	119	796098	60	GM12878-all.twopass.merge150.wgt10.zgt2.wig	blood	hotspots	Hotspots
1e-05	PrEC	2.25086	5.5e-10	0.811314	0.130772	0.555001	1.06763	132	56234	375	796098	121	PrEC-DS12098.hg19.twopass.merge150.wgt10.zgt2.wig	prostate	hotspots	Hotspots
1e-08	Fetal_Thymus	2.55533	1.39e-05	0.938182	0.2159	0.515018	1.36135	51	63996	119	796098	518	UW.Fetal_Thymus.ChromatinAccessibility.H-23663.DS16841.twopass.merge150.wgt10.zgt2.wig	fetal_thymus	hotspots	Hotspots
1e-05	Fetal_Intestine_Large	2.79106	5.53e-10	1.02642	0.165465	0.702111	1.35074	53	11389	375	796098	646	UW.Fetal_Intestine_Large.ChromatinAccessibility.H-23855.DS17502.hotspot.twopass.fdr0.01.merge.pks.wig	fetal_intestine,_large	peaks	Peaks
1e-08	GM19239	3.01977	1.4e-05	1.10518	0.254443	0.606471	1.60389	23	15359	119	796098	265	wgEncodeOpenChromDnaseGm19239AlnAllReps.30000000.hotspot.twopass.fdr0.01.merge.pks.bed	blood	peaks	Peaks
1e-05	HeLa-S3	2.18166	8.74e-10	0.780087	0.127239	0.530699	1.02948	120	54723	375	796098	898	FAIRE_helas3	cervix	faire	FAIRE
1e-08	Th1	2.53371	1.49e-05	0.929683	0.21472	0.508833	1.35053	56	77224	119	796098	103	hTH1-all.twopass.merge150.wgt10.zgt2.wig	blood	hotspots	Hotspots
1e-05	Mobilized_CD34_Primary_Cells	2.48506	9.17e-10	0.910295	0.148663	0.618916	1.20167	73	19219	375	796098	867	UW.Mobilized_CD34_Primary_Cells.ChromatinAccessibility.RO_01520.DS12785.hotspot.twopass.fdr0.01.merge.pks.wig	blood	peaks	Peaks
1e-08	HeLa-S3	2.55849	1.82e-05	0.939417	0.219192	0.5098	1.36903	49	58347	119	796098	143	wgEncodeOpenChromDnaseHelas3Ifna4hAlnAllReps.30000000.twopass.merge150.wgt10.zgt2.wig	cervix	hotspots	Hotspots
1e-05	K562	2.1395	1.27e-09	0.760573	0.125284	0.515016	1.00613	113	62030	375	796098	948	H3K9ac_k562	blood	H3K9ac	Histone_Modifications
1e-08	Fetal_Thymus	3.01417	1.93e-05	1.10332	0.258195	0.597262	1.60939	24	15264	119	796098	817	UW.Fetal_Thymus.ChromatinAccessibility.H-23663.DS16841.hotspot.twopass.fdr0.01.merge.pks.wig	fetal_thymus	peaks	Peaks
1e-05	Adult_CD4+	2.10724	1.42e-09	0.745376	0.123135	0.504033	0.98672	166	87945	375	796098	42	Adult_Th0_AllReps.30000000.twopass.merge150.wgt10.zgt2.wig	blood	hotspots	Hotspots
1e-08	GM12878	0.437812	2.01e-05	-0.82597	0.193702	-1.20562	-0.44631	66	617927	119	796098	975	seg_REPRESSED_gm12878	blood	REPRESSED	Chromatin_States
1e-05	GM19239	2.11191	1.69e-09	0.747594	0.124086	0.504385	0.990803	148	69834	375	796098	140	wgEncodeOpenChromDnaseGm19239AlnAllReps.30000000.twopass.merge150.wgt10.zgt2.wig	blood	hotspots	Hotspots
1e-08	Mobilized_CD34_Primary_Cells	2.85584	2.01e-05	1.04937	0.246125	0.566963	1.53177	26	19846	119	796098	869	UW.Mobilized_CD34_Primary_Cells.ChromatinAccessibility.RO_01535.DS12274.hotspot.twopass.fdr0.01.merge.pks.wig	blood	peaks	Peaks
1e-05	Mobilized_CD8_Primary_Cells	2.65059	1.7e-09	0.974784	0.161822	0.657612	1.29195	58	12926	375	796098	878	UW.Mobilized_CD8_Primary_Cells.ChromatinAccessibility.RO_01679.DS16962.hotspot.twopass.fdr0.01.merge.pks.wig	blood	peaks	Peaks
1e-08	K562	2.65972	2.48e-05	0.978221	0.231976	0.523549	1.43289	37	35295	119	796098	901	FAIRE_k562	blood	faire	FAIRE
1e-05	HAEpiC	2.16387	2.3e-09	0.7719	0.129184	0.5187	1.0251	126	55409	375	796098	62	HAEpiC-DS12663.twopass.merge150.wgt10.zgt2.wig	epithelium	hotspots	Hotspots
1e-08	Fetal_Thymus	2.97278	2.54e-05	1.0895	0.258731	0.582385	1.59661	23	15363	119	796098	825	UW.Fetal_Thymus.ChromatinAccessibility.H-24409.DS20341.hotspot.twopass.fdr0.01.merge.pks.wig	fetal_thymus	peaks	Peaks
1e-05	Adult_CD4+	2.34578	2.41e-09	0.852619	0.142876	0.572583	1.13266	84	24073	375	796098	167	Adult_Th0_AllReps.30000000.hotspot.twopass.fdr0.01.merge.pks.bed	blood	peaks	Peaks
1e-08	Fetal_Intestine_Large	2.5994	2.65e-05	0.955282	0.227364	0.509649	1.40092	38	38468	119	796098	650	UW.Fetal_Intestine_Large.ChromatinAccessibility.H-23964.DS17841.hotspot.twopass.fdr0.01.merge.pks.wig	fetal_intestine,_large	peaks	Peaks
1e-05	GM12878	2.09215	3.31e-09	0.738194	0.124787	0.493611	0.982777	162	82833	375	796098	60	GM12878-all.twopass.merge150.wgt10.zgt2.wig	blood	hotspots	Hotspots
1e-08	Fetal_Thymus	2.94286	3.2e-05	1.07938	0.259531	0.5707	1.58806	23	15530	119	796098	818	UW.Fetal_Thymus.ChromatinAccessibility.H-23769.DS17323.hotspot.twopass.fdr0.01.merge.pks.wig	fetal_thymus	peaks	Peaks
1e-05	GM12864	2.491	4.03e-09	0.912685	0.155146	0.608599	1.21677	66	16242	375	796098	182	GM12864-DS12431.hotspot.twopass.fdr0.01.merge.pks.bed	blood	peaks	Peaks
1e-08	GM12878	2.54069	3.23e-05	0.932435	0.224322	0.492765	1.37211	32	51583	119	796098	939	H3K79me2_gm12878	blood	H3K79me2	Histone_Modifications
1e-05	HMVEC-dLy-Neo	2.13123	4.46e-09	0.756701	0.128992	0.503877	1.00953	121	53425	375	796098	88	HMVEC_dLyNeo-DS13150.twopass.merge150.wgt10.zgt2.wig	blood_vessel	hotspots	Hotspots
1e-08	K562	2.40552	3.82e-05	0.877765	0.213138	0.460016	1.29551	41	62030	119	796098	948	H3K9ac_k562	blood	H3K9ac	Histone_Modifications
1e-05	GM19238	2.06068	4.66e-09	0.723037	0.123413	0.481149	0.964926	154	77555	375	796098	139	wgEncodeOpenChromDnaseGm19238AlnAllReps.30000000.twopass.merge150.wgt10.zgt2.wig	blood	hotspots	Hotspots
1e-08	HMVEC-dBl-Neo	2.43929	4.22e-05	0.891709	0.21775	0.464919	1.3185	46	61966	119	796098	86	HMVEC_dBlNeo-DS13242.twopass.merge150.wgt10.zgt2.wig	blood_vessel	hotspots	Hotspots
1e-05	Mobilized_CD34_Primary_Cells	2.45925	5.27e-09	0.899857	0.154123	0.597775	1.20194	66	16799	375	796098	865	UW.Mobilized_CD34_Primary_Cells.ChromatinAccessibility.RO_01508.DS11202.hotspot.twopass.fdr0.01.merge.pks.wig	blood	peaks	Peaks
1e-08	CD19_Primary_Cells	3.03785	4.3e-05	1.11115	0.271638	0.578739	1.64356	20	11644	119	796098	595	UW.CD19_Primary_Cells.ChromatinAccessibility.RO_01689.DS17281.hotspot.twopass.fdr0.01.merge.pks.wig	blood	peaks	Peaks
1e-05	Mobilized_CD34_Primary_Cells	2.40397	5.68e-09	0.877122	0.150556	0.582032	1.17221	70	18702	375	796098	863	UW.Mobilized_CD34_Primary_Cells.ChromatinAccessibility.RO_01492.DS12774.hotspot.twopass.fdr0.01.merge.pks.wig	blood	peaks	Peaks
1e-08	GM19239	2.38333	4.71e-05	0.868497	0.213422	0.450191	1.2868	52	69834	119	796098	140	wgEncodeOpenChromDnaseGm19239AlnAllReps.30000000.twopass.merge150.wgt10.zgt2.wig	blood	hotspots	Hotspots
1e-05	GM12891	2.03017	6.14e-09	0.708118	0.12182	0.469351	0.946884	152	80421	375	796098	136	wgEncodeOpenChromDnaseGm12891AlnAllReps.30000000.twopass.merge150.wgt10.zgt2.wig	blood	hotspots	Hotspots
1e-08	Mobilized_CD34_Primary_Cells	2.82782	4.78e-05	1.0395	0.255665	0.538402	1.54061	23	16799	119	796098	865	UW.Mobilized_CD34_Primary_Cells.ChromatinAccessibility.RO_01508.DS11202.hotspot.twopass.fdr0.01.merge.pks.wig	blood	peaks	Peaks
1e-05	HeLa-S3	2.07841	6.36e-09	0.731605	0.125989	0.484667	0.978543	173	95408	375	796098	73	Hela-all.twopass.merge150.wgt10.zgt2.wig	cervix	hotspots	Hotspots
1e-08	CLL	3.00511	4.83e-05	1.10032	0.270775	0.569598	1.63103	19	12041	119	796098	257	wgEncodeOpenChromDnaseCllAlnAllReps.30000000.hotspot.twopass.fdr0.01.merge.pks.bed	blood	peaks	Peaks
1e-05	HMVEC-dBl-Ad	2.11118	7.89e-09	0.747249	0.129488	0.493452	1.00105	118	52435	375	796098	85	HMVEC_dBlAd-DS13337.twopass.merge150.wgt10.zgt2.wig	blood_vessel	hotspots	Hotspots
1e-08	GM12891	2.32324	5.91e-05	0.842963	0.20989	0.431579	1.25435	54	80421	119	796098	136	wgEncodeOpenChromDnaseGm12891AlnAllReps.30000000.twopass.merge150.wgt10.zgt2.wig	blood	hotspots	Hotspots
1e-05	Mobilized_CD34_Primary_Cells	2.36093	8.63e-09	0.859056	0.149256	0.566513	1.1516	71	19846	375	796098	869	UW.Mobilized_CD34_Primary_Cells.ChromatinAccessibility.RO_01535.DS12274.hotspot.twopass.fdr0.01.merge.pks.wig	blood	peaks	Peaks
1e-08	Mobilized_CD34_Primary_Cells	2.66522	5.98e-05	0.980287	0.24424	0.501577	1.459	27	22319	119	796098	872	UW.Mobilized_CD34_Primary_Cells.ChromatinAccessibility.RO_01549.DS12734.hotspot.twopass.fdr0.01.merge.pks.wig	blood	peaks	Peaks
1e-05	Fetal_Thymus	2.49352	9.73e-09	0.913696	0.159311	0.601447	1.22595	61	14807	375	796098	824	UW.Fetal_Thymus.ChromatinAccessibility.H-24401.DS20335.hotspot.twopass.fdr0.01.merge.pks.wig	fetal_thymus	peaks	Peaks
1e-08	Fetal_Renal_Cortex_Right	2.57351	6.07e-05	0.945273	0.235715	0.483272	1.40727	32	29455	119	796098	783	UW.Fetal_Renal_Cortex_Right.ChromatinAccessibility.H-24232.DS19254.hotspot.twopass.fdr0.01.merge.pks.wig	fetal_renal_cortex	peaks	Peaks
1e-05	K562	0.519927	1.18e-08	-0.65407	0.114682	-0.87884	-0.42929	244	639892	375	796098	980	seg_REPRESSED_k562	blood	REPRESSED	Chromatin_States
1e-08	pHTE	2.53285	6.78e-05	0.929344	0.233278	0.472119	1.38657	33	30935	119	796098	283	wgEncodeOpenChromDnasePhteAlnAllReps.30000000.hotspot.twopass.fdr0.01.merge.pks.bed	epithelium	peaks	Peaks
1e-05	Mobilized_CD34_Primary_Cells	2.40116	1.23e-08	0.875951	0.153798	0.574507	1.17739	67	17244	375	796098	866	UW.Mobilized_CD34_Primary_Cells.ChromatinAccessibility.RO_01517.DS14129.hotspot.twopass.fdr0.01.merge.pks.wig	blood	peaks	Peaks
1e-08	NH-A	3.0658	7.53e-05	1.12031	0.282995	0.565639	1.67498	17	11601	119	796098	33	NH-A_footprints.txt	nervous	footprints	Footprints
1e-05	HUVEC	2.05069	1.3e-08	0.718177	0.126292	0.470644	0.965711	171	91348	375	796098	105	HUVEC-all.twopass.merge150.wgt10.zgt2.wig	blood_vessel	hotspots	Hotspots
1e-08	Fetal_Placenta	2.35738	7.74e-05	0.857549	0.216977	0.432275	1.28282	51	72833	119	796098	467	UW.Fetal_Placenta.ChromatinAccessibility.H-23914.DS17744.twopass.merge150.wgt10.zgt2.wig	fetal_placenta	hotspots	Hotspots
1e-05	K562	2.05283	1.33e-08	0.719217	0.126577	0.471126	0.967309	114	60355	375	796098	904	H2AFZ_k562	blood	H2AFZ	Histone_Modifications
1e-08	HeLa-S3	2.35032	8.75e-05	0.854553	0.217845	0.427576	1.28153	41	54723	119	796098	898	FAIRE_helas3	cervix	faire	FAIRE
1e-05	HMVEC-dBl-Neo	2.05375	1.67e-08	0.719667	0.127534	0.469701	0.969633	128	61966	375	796098	86	HMVEC_dBlNeo-DS13242.twopass.merge150.wgt10.zgt2.wig	blood_vessel	hotspots	Hotspots
1e-08	Mobilized_CD34_Primary_Cells	2.74476	9.03e-05	1.00969	0.257886	0.504235	1.51515	22	16241	119	796098	871	UW.Mobilized_CD34_Primary_Cells.ChromatinAccessibility.RO_01536.DS12339.hotspot.twopass.fdr0.01.merge.pks.wig	blood	peaks	Peaks
1e-05	Mobilized_CD34_Primary_Cells	2.35955	1.83e-08	0.858471	0.152562	0.55945	1.15749	67	18289	375	796098	868	UW.Mobilized_CD34_Primary_Cells.ChromatinAccessibility.RO_01527.DS11666.hotspot.twopass.fdr0.01.merge.pks.wig	blood	peaks	Peaks
1e-08	Fetal_Muscle_Upper_Limb_Skeletal	2.34502	9.47e-05	0.852293	0.218324	0.424377	1.28021	49	69556	119	796098	464	UW.Fetal_Muscle_Upper_Limb_Skeletal.ChromatinAccessibility.H-23887.DS17661.twopass.merge150.wgt10.zgt2.wig	fetal_muscle	hotspots	Hotspots
1e-05	Fetal_Intestine_Small	2.51407	1.85e-08	0.921904	0.163892	0.600675	1.24313	55	12799	375	796098	660	UW.Fetal_Intestine_Small.ChromatinAccessibility.H-23808.DS17425.hotspot.twopass.fdr0.01.merge.pks.wig	fetal_intestine,_small	peaks	Peaks
1e-08	Mobilized_CD34_Primary_Cells	2.70806	9.58e-05	0.996232	0.255375	0.495698	1.49677	23	17161	119	796098	874	UW.Mobilized_CD34_Primary_Cells.ChromatinAccessibility.RO_01701.DS17112.hotspot.twopass.fdr0.01.merge.pks.wig	blood	peaks	Peaks
1e-05	IMR90	2.07902	1.87e-08	0.731895	0.13014	0.47682	0.98697	122	53845	375	796098	557	UW.IMR90.ChromatinAccessibility.DS13229.twopass.merge150.wgt10.zgt2.wig	lung	hotspots	Hotspots
1e-08	Mobilized_CD34_Primary_Cells	2.73253	9.78e-05	1.00523	0.258014	0.499521	1.51094	22	16555	119	796098	861	UW.Mobilized_CD34_Primary_Cells.ChromatinAccessibility.RO_00738.DS13199.hotspot.twopass.fdr0.01.merge.pks.wig	blood	peaks	Peaks
1e-05	A549	2.02375	2.16e-08	0.704951	0.125913	0.458161	0.951741	165	86803	375	796098	41	A549-all.twopass.merge150.wgt10.zgt2.wig	epithelium	hotspots	Hotspots
1e-08	NB4	2.88057	0.000102	1.05799	0.272304	0.524272	1.5917	19	12634	119	796098	32	NB4_footprints.txt	blood	footprints	Footprints
1e-05	Breast_vHMEC	2.07059	2.27e-08	0.727836	0.130204	0.472635	0.983037	126	56457	375	796098	291	UW.Breast_vHMEC.ChromatinAccessibility.RM035.DS18406.twopass.merge150.wgt10.zgt2.wig	breast	hotspots	Hotspots
1e-08	K562	2.31567	0.000105	0.839697	0.21644	0.415475	1.26392	59	92993	119	796098	110	K562-all.twopass.merge150.wgt10.zgt2.wig	blood	hotspots	Hotspots
1e-05	GM19239	2.4031	2.3e-08	0.87676	0.156913	0.569209	1.18431	59	15359	375	796098	265	wgEncodeOpenChromDnaseGm19239AlnAllReps.30000000.hotspot.twopass.fdr0.01.merge.pks.bed	blood	peaks	Peaks
1e-08	GM12878	2.54954	0.000116	0.935914	0.242837	0.459954	1.41187	29	34102	119	796098	949	H3K9me3_gm12878	blood	H3K9me3	Histone_Modifications
1e-05	T-47D	2.01864	2.32e-08	0.702422	0.125737	0.455978	0.948866	138	68753	375	796098	161	wgEncodeOpenChromDnaseT47dAlnAllReps.30000000.twopass.merge150.wgt10.zgt2.wig	breast	hotspots	Hotspots
1e-08	GM12892	2.22844	0.000119	0.801301	0.208263	0.393106	1.2095	54	85496	119	796098	137	wgEncodeOpenChromDnaseGm12892AlnAllReps.30000000.twopass.merge150.wgt10.zgt2.wig	blood	hotspots	Hotspots
1e-05	GM18507	2.43059	3e-08	0.888136	0.160272	0.574003	1.20227	57	14318	375	796098	263	wgEncodeOpenChromDnaseGm18507AlnAllReps.30000000.hotspot.twopass.fdr0.01.merge.pks.bed	blood	peaks	Peaks
1e-08	Breast_vHMEC	2.35471	0.00012	0.856419	0.22272	0.419889	1.29295	44	56721	119	796098	292	UW.Breast_vHMEC.ChromatinAccessibility.RM035.DS18438.twopass.merge150.wgt10.zgt2.wig	breast	hotspots	Hotspots
1e-05	K562	2.06328	3.57e-08	0.724297	0.131425	0.466704	0.981891	102	47583	375	796098	932	H3K4me2_k562	blood	H3K4me2	Histone_Modifications
1e-08	Fetal_Intestine_Large	2.28954	0.000126	0.828353	0.215992	0.405008	1.2517	60	100936	119	796098	351	UW.Fetal_Intestine_Large.ChromatinAccessibility.H-23964.DS17841.twopass.merge150.wgt10.zgt2.wig	fetal_intestine,_large	hotspots	Hotspots
1e-05	Fetal_Muscle_Leg	1.9945	3.68e-08	0.690393	0.125402	0.444605	0.93618	140	72616	375	796098	449	UW.Fetal_Muscle_Leg.ChromatinAccessibility.H-24078.DS18386.twopass.merge150.wgt10.zgt2.wig	fetal_muscle	hotspots	Hotspots
1e-08	GM12878	2.2787	0.00016	0.823607	0.218177	0.39598	1.25123	35	70943	119	796098	917	H3K36me3_gm12878	blood	H3K36me3	Histone_Modifications
1e-05	GM12865	2.36343	3.73e-08	0.860113	0.156291	0.553782	1.16644	65	16749	375	796098	183	GM12865-DS12436.hotspot.twopass.fdr0.01.merge.pks.bed	blood	peaks	Peaks
1e-08	HCPEpiC	2.54244	0.000174	0.933125	0.248598	0.445873	1.42038	27	23229	119	796098	194	HCPEpiC-DS12447.hotspot.twopass.fdr0.01.merge.pks.bed	epithelium	peaks	Peaks
1e-05	K562	2.13674	4.09e-08	0.759283	0.138383	0.488052	1.03051	99	35295	375	796098	901	FAIRE_k562	blood	faire	FAIRE
1e-08	GM12878	2.62464	0.00018	0.964942	0.257583	0.46008	1.46981	24	19311	119	796098	987	seg_TSS_gm12878	blood	TSS	Chromatin_States
1e-05	Penis_Foreskin_Fibroblast_Primary_Cells	2.02074	4.31e-08	0.703463	0.128426	0.451748	0.955179	126	58611	375	796098	583	UW.Penis_Foreskin_Fibroblast_Primary_Cells.ChromatinAccessibility.skin02.DS18256.twopass.merge150.wgt10.zgt2.wig	fibroblast	hotspots	Hotspots
1e-08	AG04450	2.31475	0.00019	0.839302	0.224928	0.398442	1.28016	41	48712	119	796098	44	AG04450-DS12270.twopass.merge150.wgt10.zgt2.wig	lung	hotspots	Hotspots
1e-05	Fetal_Muscle_Upper_Limb_Skeletal	2.00811	4.44e-08	0.697193	0.127402	0.447486	0.946901	137	69556	375	796098	464	UW.Fetal_Muscle_Upper_Limb_Skeletal.ChromatinAccessibility.H-23887.DS17661.twopass.merge150.wgt10.zgt2.wig	fetal_muscle	hotspots	Hotspots
1e-08	Fetal_Placenta	2.41856	0.000192	0.883171	0.236793	0.419058	1.34728	31	30796	119	796098	765	UW.Fetal_Placenta.ChromatinAccessibility.H-23887.DS17639.hotspot.twopass.fdr0.01.merge.pks.wig	fetal_placenta	peaks	Peaks
1e-05	GM19238	2.30328	4.51e-08	0.834335	0.152542	0.535353	1.13332	67	18013	375	796098	264	wgEncodeOpenChromDnaseGm19238AlnAllReps.30000000.hotspot.twopass.fdr0.01.merge.pks.bed	blood	peaks	Peaks
1e-08	IMR90	2.2896	0.000196	0.828379	0.222426	0.392424	1.26433	43	53845	119	796098	557	UW.IMR90.ChromatinAccessibility.DS13229.twopass.merge150.wgt10.zgt2.wig	lung	hotspots	Hotspots
1e-05	GM19240	2.23903	4.79e-08	0.806041	0.147652	0.516644	1.09544	73	21432	375	796098	266	wgEncodeOpenChromDnaseGm19240AlnAllReps.30000000.hotspot.twopass.fdr0.01.merge.pks.bed	blood	peaks	Peaks
1e-08	MCF-7	2.24697	0.00023	0.809584	0.219782	0.378812	1.24036	58	89372	119	796098	112	MCF7-all.twopass.merge150.wgt10.zgt2.wig	breast	hotspots	Hotspots
1e-05	CLL	2.48473	4.87e-08	0.910163	0.166823	0.58319	1.23714	50	12041	375	796098	257	wgEncodeOpenChromDnaseCllAlnAllReps.30000000.hotspot.twopass.fdr0.01.merge.pks.bed	blood	peaks	Peaks
1e-08	Fetal_Muscle_Leg	2.2095	0.000232	0.792768	0.215376	0.370631	1.2149	49	72616	119	796098	449	UW.Fetal_Muscle_Leg.ChromatinAccessibility.H-24078.DS18386.twopass.merge150.wgt10.zgt2.wig	fetal_muscle	hotspots	Hotspots
1e-05	Fetal_Thymus	2.38281	4.97e-08	0.868282	0.159252	0.556148	1.18042	61	15363	375	796098	825	UW.Fetal_Thymus.ChromatinAccessibility.H-24409.DS20341.hotspot.twopass.fdr0.01.merge.pks.wig	fetal_thymus	peaks	Peaks
1e-08	HUVEC	2.40625	0.000233	0.87807	0.238599	0.410416	1.34572	31	29116	119	796098	900	FAIRE_huvec	blood_vessel	faire	FAIRE
1e-05	HMVEC-LBl	2.3074	5e-08	0.836119	0.153379	0.535496	1.13674	67	18703	375	796098	214	HMVEC_LBl-DS13372.hotspot.twopass.fdr0.01.merge.pks.bed	blood_vessel	peaks	Peaks
1e-08	iPS_DF_19.7	2.25877	0.000237	0.814822	0.221634	0.380418	1.24923	45	58791	119	796098	559	UW.iPS_DF_19.7.ChromatinAccessibility.DS15148.twopass.merge150.wgt10.zgt2.wig	ips_cell	hotspots	Hotspots
1e-05	HMF	2.04668	5.04e-08	0.716221	0.131423	0.458632	0.97381	116	50162	375	796098	83	HMF-DS13363.twopass.merge150.wgt10.zgt2.wig	breast	hotspots	Hotspots
1e-08	Fetal_Thymus	2.61844	0.000245	0.96258	0.262451	0.448176	1.47698	22	16097	119	796098	819	UW.Fetal_Thymus.ChromatinAccessibility.H-23833.DS17474.hotspot.twopass.fdr0.01.merge.pks.wig	fetal_thymus	peaks	Peaks
1e-05	Fetal_Thymus	2.40373	5.19e-08	0.877021	0.161082	0.561299	1.19274	59	14656	375	796098	820	UW.Fetal_Thymus.ChromatinAccessibility.H-23964.DS17875.hotspot.twopass.fdr0.01.merge.pks.wig	fetal_thymus	peaks	Peaks
1e-08	Th1	2.32787	0.000249	0.844952	0.230636	0.392906	1.297	35	34442	119	796098	227	hTH1-all.fdr0.01.bed	blood	peaks	Peaks
1e-05	GM12878	2.43897	5.57e-08	0.891577	0.164134	0.569875	1.21328	55	13786	375	796098	896	FAIRE_gm12878	blood	faire	FAIRE
1e-08	GM12891	2.55798	0.000249	0.939216	0.256394	0.436684	1.44175	22	17821	119	796098	261	wgEncodeOpenChromDnaseGm12891AlnAllReps.30000000.hotspot.twopass.fdr0.01.merge.pks.bed	blood	peaks	Peaks
1e-05	CD34+	2.2638	6.24e-08	0.817044	0.150976	0.521132	1.11296	68	19479	375	796098	178	CD34-DS16814.hg19.hotspot.twopass.fdr0.01.merge.pks.bed	blood	peaks	Peaks
1e-08	HeLa-S3	2.22501	0.000252	0.799762	0.218498	0.371507	1.22802	58	95408	119	796098	73	Hela-all.twopass.merge150.wgt10.zgt2.wig	cervix	hotspots	Hotspots
1e-05	HCF	2.0214	6.37e-08	0.703788	0.130134	0.448725	0.958851	119	53351	375	796098	67	HCF-DS12501.twopass.merge150.wgt10.zgt2.wig	heart	hotspots	Hotspots
1e-08	HMEC	2.21956	0.000278	0.797309	0.219334	0.367414	1.2272	61	93585	119	796098	82	HMEC-all.twopass.merge150.wgt10.zgt2.wig	breast	hotspots	Hotspots
1e-05	Fetal_Intestine_Large	1.97615	7.09e-08	0.681153	0.126397	0.433414	0.928891	146	75881	375	796098	346	UW.Fetal_Intestine_Large.ChromatinAccessibility.H-23833.DS17462.twopass.merge150.wgt10.zgt2.wig	fetal_intestine,_large	hotspots	Hotspots
1e-08	MCF-7	2.17378	0.000303	0.776467	0.214948	0.355169	1.19776	48	69010	119	796098	151	wgEncodeOpenChromDnaseMcf7HypoxlacAlnAllReps.30000000.twopass.merge150.wgt10.zgt2.wig	breast	hotspots	Hotspots
1e-05	HMEC	1.97684	7.22e-08	0.681502	0.126539	0.433485	0.929519	173	93585	375	796098	82	HMEC-all.twopass.merge150.wgt10.zgt2.wig	breast	hotspots	Hotspots
1e-08	Breast_vHMEC	2.23681	0.000306	0.805052	0.222974	0.368023	1.24208	43	56457	119	796098	291	UW.Breast_vHMEC.ChromatinAccessibility.RM035.DS18406.twopass.merge150.wgt10.zgt2.wig	breast	hotspots	Hotspots
1e-05	Mobilized_CD34_Primary_Cells	2.31914	8.32e-08	0.841194	0.156935	0.533602	1.14879	60	16241	375	796098	871	UW.Mobilized_CD34_Primary_Cells.ChromatinAccessibility.RO_01536.DS12339.hotspot.twopass.fdr0.01.merge.pks.wig	blood	peaks	Peaks
1e-08	HAEpiC	2.22781	0.000307	0.801017	0.22192	0.366053	1.23598	43	55409	119	796098	62	HAEpiC-DS12663.twopass.merge150.wgt10.zgt2.wig	epithelium	hotspots	Hotspots
1e-05	GM12878	2.18345	8.42e-08	0.780907	0.145751	0.495235	1.06658	77	34102	375	796098	949	H3K9me3_gm12878	blood	H3K9me3	Histone_Modifications
1e-08	E_myoblast	2.17671	0.000308	0.777814	0.215546	0.355344	1.20028	50	69247	119	796098	56	E_myoblast_AllReps.30000000.twopass.merge150.wgt10.zgt2.wig	muscle	hotspots	Hotspots
1e-05	IMR90	2.28657	8.92e-08	0.827055	0.154662	0.523918	1.13019	67	19024	375	796098	853	UW.IMR90.ChromatinAccessibility.DS11759.hotspot.twopass.fdr0.01.merge.pks.wig	lung	peaks	Peaks
1e-08	HCF	2.22169	0.000327	0.798269	0.222188	0.362781	1.23376	42	53351	119	796098	67	HCF-DS12501.twopass.merge150.wgt10.zgt2.wig	heart	hotspots	Hotspots
1e-05	MCF-7	1.97115	8.99e-08	0.678616	0.12694	0.429814	0.927418	167	89372	375	796098	112	MCF7-all.twopass.merge150.wgt10.zgt2.wig	breast	hotspots	Hotspots
1e-08	HeLa-S3	2.2873	0.000329	0.827371	0.230376	0.375835	1.27891	31	39208	119	796098	907	H3K27ac_helas3	cervix	H3K27ac	Histone_Modifications
1e-05	IMR90	2.01465	9.08e-08	0.700443	0.131066	0.443555	0.957332	121	53301	375	796098	555	UW.IMR90.ChromatinAccessibility.DS11764.twopass.merge150.wgt10.zgt2.wig	lung	hotspots	Hotspots
1e-08	Mobilized_CD34_Primary_Cells	2.55559	0.00035	0.938283	0.262453	0.423875	1.45269	21	16319	119	796098	864	UW.Mobilized_CD34_Primary_Cells.ChromatinAccessibility.RO_01492.DS14206.hotspot.twopass.fdr0.01.merge.pks.wig	blood	peaks	Peaks
1e-05	GM12865	2.54044	9.3e-08	0.932336	0.174597	0.590126	1.27455	48	10104	375	796098	8	GM12865_footprints.txt	blood	footprints	Footprints
1e-08	GM19240	2.42945	0.000351	0.887666	0.248316	0.400966	1.37437	26	21432	119	796098	266	wgEncodeOpenChromDnaseGm19240AlnAllReps.30000000.hotspot.twopass.fdr0.01.merge.pks.bed	blood	peaks	Peaks
1e-05	Mobilized_CD34_Primary_Cells	1.99575	1.21e-07	0.691018	0.130566	0.435109	0.946926	118	51249	375	796098	562	UW.Mobilized_CD34_Primary_Cells.ChromatinAccessibility.RO_00738.DS13199.twopass.merge150.wgt10.zgt2.wig	blood	hotspots	Hotspots
1e-08	Mobilized_CD34_Primary_Cells	2.52887	0.000354	0.927772	0.259715	0.41873	1.43681	22	17244	119	796098	866	UW.Mobilized_CD34_Primary_Cells.ChromatinAccessibility.RO_01517.DS14129.hotspot.twopass.fdr0.01.merge.pks.wig	blood	peaks	Peaks
1e-05	HeLa-S3	2.35414	1.31e-07	0.856174	0.162253	0.538159	1.17419	51	17182	375	796098	965	seg_ENHANCER_helas3	cervix	ENHANCER	Chromatin_States
1e-08	Fibroblasts_Fetal_Skin_Abdomen	2.20406	0.000368	0.7903	0.221848	0.355477	1.22512	44	59200	119	796098	527	UW.Fibroblasts_Fetal_Skin_Abdomen.ChromatinAccessibility.H-24259.DS19558.twopass.merge150.wgt10.zgt2.wig	fibroblast	hotspots	Hotspots
1e-05	IMR90	2.26811	1.35e-07	0.818947	0.155323	0.514513	1.12338	64	18833	375	796098	854	UW.IMR90.ChromatinAccessibility.DS11764.hotspot.twopass.fdr0.01.merge.pks.wig	lung	peaks	Peaks
1e-08	HeLa-S3	2.21846	0.000368	0.796813	0.223714	0.358334	1.23529	34	45088	119	796098	935	H3K4me3_helas3	cervix	H3K4me3	Histone_Modifications
1e-05	GM19240	1.92166	1.5e-07	0.65319	0.124357	0.409451	0.896929	153	83925	375	796098	141	wgEncodeOpenChromDnaseGm19240AlnAllReps.30000000.twopass.merge150.wgt10.zgt2.wig	blood	hotspots	Hotspots
1e-08	HeLa-S3	2.60303	0.000391	0.956677	0.269772	0.427923	1.48543	19	17182	119	796098	965	seg_ENHANCER_helas3	cervix	ENHANCER	Chromatin_States
1e-05	Fetal_Intestine_Large	1.92023	1.54e-07	0.652443	0.124339	0.408739	0.896148	173	100936	375	796098	351	UW.Fetal_Intestine_Large.ChromatinAccessibility.H-23964.DS17841.twopass.merge150.wgt10.zgt2.wig	fetal_intestine,_large	hotspots	Hotspots
1e-08	GM19240	2.13732	0.000405	0.759554	0.214745	0.338653	1.18046	55	83925	119	796098	141	wgEncodeOpenChromDnaseGm19240AlnAllReps.30000000.twopass.merge150.wgt10.zgt2.wig	blood	hotspots	Hotspots
1e-05	HL-60	2.22637	1.67e-07	0.800372	0.152947	0.500595	1.10015	69	18500	375	796098	205	HL60-DS11809.hotspot.twopass.fdr0.01.merge.pks.bed	blood	peaks	Peaks
1e-08	Fetal_Lung_Left	2.3076	0.00041	0.836206	0.236668	0.372337	1.30008	31	31637	119	796098	697	UW.Fetal_Lung_Left.ChromatinAccessibility.H-23640.DS18170.hotspot.twopass.fdr0.01.merge.pks.wig	fetal_lung	peaks	Peaks
1e-05	Mobilized_CD34_Primary_Cells	2.16896	1.74e-07	0.774247	0.148171	0.483832	1.06466	72	22319	375	796098	872	UW.Mobilized_CD34_Primary_Cells.ChromatinAccessibility.RO_01549.DS12734.hotspot.twopass.fdr0.01.merge.pks.wig	blood	peaks	Peaks
1e-08	Fetal_Placenta	2.38493	0.000428	0.869171	0.246754	0.385533	1.35281	26	23953	119	796098	766	UW.Fetal_Placenta.ChromatinAccessibility.H-23914.DS17744.hotspot.twopass.fdr0.01.merge.pks.wig	fetal_placenta	peaks	Peaks
1e-05	HCM	1.96465	1.74e-07	0.675316	0.129253	0.421981	0.928651	125	59191	375	796098	68	HCM-DS12599.twopass.merge150.wgt10.zgt2.wig	heart	hotspots	Hotspots
1e-08	Fetal_Intestine_Small	2.16599	0.000442	0.772876	0.219981	0.341712	1.20404	44	56928	119	796098	355	UW.Fetal_Intestine_Small.ChromatinAccessibility.H-23640.DS16712.twopass.merge150.wgt10.zgt2.wig	fetal_intestine,_small	hotspots	Hotspots
1e-05	AoSMC	1.98588	1.75e-07	0.686065	0.13134	0.428639	0.94349	125	56615	375	796098	130	wgEncodeOpenChromDnaseAosmcSerumfreeAlnAllReps.30000000.twopass.merge150.wgt10.zgt2.wig	blood_vessel	hotspots	Hotspots
1e-08	CD20+	2.99831	0.000447	1.09805	0.312759	0.48504	1.71106	14	7146	119	796098	2	CD20+_footprints.txt	blood	footprints	Footprints
1e-05	LNCaP	1.94579	1.77e-07	0.66567	0.127473	0.415823	0.915518	170	95187	375	796098	111	LNCap-all.twopass.merge150.wgt10.zgt2.wig	prostate	hotspots	Hotspots
1e-08	Gliobla	2.44516	0.000451	0.894109	0.254857	0.394589	1.39363	24	19195	119	796098	260	wgEncodeOpenChromDnaseGlioblaAlnAllReps.30000000.hotspot.twopass.fdr0.01.merge.pks.bed	brain	peaks	Peaks
1e-05	Mobilized_CD34_Primary_Cells	2.25276	1.78e-07	0.812157	0.155557	0.507265	1.11705	63	17161	375	796098	874	UW.Mobilized_CD34_Primary_Cells.ChromatinAccessibility.RO_01701.DS17112.hotspot.twopass.fdr0.01.merge.pks.wig	blood	peaks	Peaks
1e-08	HCPEpiC	2.59256	0.000476	0.952645	0.272662	0.418228	1.48706	19	14971	119	796098	14	HCPEpiC_footprints.txt	epithelium	footprints	Footprints
1e-05	IMR90	1.99462	1.79e-07	0.690452	0.13226	0.431222	0.949682	117	50483	375	796098	554	UW.IMR90.ChromatinAccessibility.DS11759.twopass.merge150.wgt10.zgt2.wig	lung	hotspots	Hotspots
1e-08	T-47D	2.12562	0.000491	0.754062	0.21633	0.330055	1.17807	48	68753	119	796098	161	wgEncodeOpenChromDnaseT47dAlnAllReps.30000000.twopass.merge150.wgt10.zgt2.wig	breast	hotspots	Hotspots
1e-05	HCPEpiC	2.17785	1.79e-07	0.778337	0.149104	0.486092	1.07058	74	23229	375	796098	194	HCPEpiC-DS12447.hotspot.twopass.fdr0.01.merge.pks.bed	epithelium	peaks	Peaks
1e-08	NA	2.9855	0.000496	1.09377	0.314041	0.478247	1.70929	13	7128	119	796098	891	5_prime_UTR_variant	NA	5'UTR	Genic
1e-05	8988T	1.88655	1.83e-07	0.634752	0.121693	0.396234	0.87327	154	89624	375	796098	129	wgEncodeOpenChromDnase8988tAlnAllReps.30000000.twopass.merge150.wgt10.zgt2.wig	liver	hotspots	Hotspots
1e-08	AoSMC	2.18474	0.000506	0.781495	0.224714	0.341055	1.22193	43	56615	119	796098	130	wgEncodeOpenChromDnaseAosmcSerumfreeAlnAllReps.30000000.twopass.merge150.wgt10.zgt2.wig	blood_vessel	hotspots	Hotspots
1e-05	HPF	2.2663	1.84e-07	0.818148	0.156886	0.510652	1.12564	62	17878	375	796098	220	HPF-DS13390.hotspot.twopass.fdr0.01.merge.pks.bed	lung	peaks	Peaks
1e-08	Fetal_Thymus	2.5614	0.000513	0.940554	0.270758	0.409868	1.47124	21	14656	119	796098	820	UW.Fetal_Thymus.ChromatinAccessibility.H-23964.DS17875.hotspot.twopass.fdr0.01.merge.pks.wig	fetal_thymus	peaks	Peaks
1e-05	HUVEC	2.09841	1.9e-07	0.74118	0.1423	0.462273	1.02009	83	29116	375	796098	900	FAIRE_huvec	blood_vessel	faire	FAIRE
1e-08	GM12865	2.49791	0.000516	0.915455	0.263658	0.398686	1.43222	22	16749	119	796098	183	GM12865-DS12436.hotspot.twopass.fdr0.01.merge.pks.bed	blood	peaks	Peaks
1e-05	AG04450	1.99173	2e-07	0.689002	0.132509	0.429284	0.94872	114	48712	375	796098	44	AG04450-DS12270.twopass.merge150.wgt10.zgt2.wig	lung	hotspots	Hotspots
1e-08	A549	2.12759	0.000529	0.75499	0.217854	0.327997	1.18198	55	86803	119	796098	41	A549-all.twopass.merge150.wgt10.zgt2.wig	epithelium	hotspots	Hotspots
1e-05	Stellate	1.91276	2.08e-07	0.648548	0.124915	0.403714	0.893383	140	73194	375	796098	160	wgEncodeOpenChromDnaseStellateAlnAllReps.30000000.twopass.merge150.wgt10.zgt2.wig	liver	hotspots	Hotspots
1e-08	NB4	2.14962	0.000546	0.765293	0.221363	0.331421	1.19917	42	54093	119	796098	113	NB4-DS12543.twopass.merge150.wgt10.zgt2.wig	blood	hotspots	Hotspots
1e-05	Breast_vHMEC	2.19585	2.57e-07	0.786568	0.152658	0.487358	1.08578	67	20348	375	796098	591	UW.Breast_vHMEC.ChromatinAccessibility.RM035.DS18438.hotspot.twopass.fdr0.01.merge.pks.wig	breast	peaks	Peaks
1e-08	HTR8svn	2.12668	0.000596	0.75456	0.219779	0.323792	1.18533	45	58208	119	796098	146	wgEncodeOpenChromDnaseHtr8AlnAllReps.30000000.twopass.merge150.wgt10.zgt2.wig	blastula	hotspots	Hotspots
1e-05	Fetal_Intestine_Large	1.91372	2.62e-07	0.649049	0.126059	0.401974	0.896124	139	71165	375	796098	340	UW.Fetal_Intestine_Large.ChromatinAccessibility.H-23524.DS16164.twopass.merge150.wgt10.zgt2.wig	fetal_intestine,_large	hotspots	Hotspots
1e-08	Mobilized_CD34_Primary_Cells	2.38903	0.000632	0.870887	0.254826	0.371427	1.37035	23	19565	119	796098	862	UW.Mobilized_CD34_Primary_Cells.ChromatinAccessibility.RO_01480.DS12771.hotspot.twopass.fdr0.01.merge.pks.wig	blood	peaks	Peaks
1e-05	HSMM	1.91754	2.74e-07	0.651043	0.126646	0.402817	0.899269	180	104498	375	796098	101	HSMM-all.twopass.merge150.wgt10.zgt2.wig	muscle	hotspots	Hotspots
1e-08	NHEK	2.10469	0.000649	0.744169	0.218203	0.316491	1.17185	58	91134	119	796098	117	NHEK-all.twopass.merge150.wgt10.zgt2.wig	skin	hotspots	Hotspots
1e-05	HMVEC-LLy	1.94892	2.87e-07	0.667277	0.130022	0.412435	0.92212	115	52847	375	796098	91	HMVEC_LLy-DS13185.twopass.merge150.wgt10.zgt2.wig	blood_vessel	hotspots	Hotspots
1e-08	GM18507	2.5098	0.000689	0.920204	0.271147	0.388756	1.45165	20	14318	119	796098	263	wgEncodeOpenChromDnaseGm18507AlnAllReps.30000000.hotspot.twopass.fdr0.01.merge.pks.bed	blood	peaks	Peaks
1e-05	Penis_Foreskin_Fibroblast_Primary_Cells	1.91425	2.91e-07	0.649327	0.126589	0.401212	0.897442	143	73216	375	796098	581	UW.Penis_Foreskin_Fibroblast_Primary_Cells.ChromatinAccessibility.skin01.DS18229.twopass.merge150.wgt10.zgt2.wig	fibroblast	hotspots	Hotspots
1e-08	Fetal_Intestine_Large	2.08515	0.000692	0.734843	0.216583	0.310341	1.15935	48	71165	119	796098	340	UW.Fetal_Intestine_Large.ChromatinAccessibility.H-23524.DS16164.twopass.merge150.wgt10.zgt2.wig	fetal_intestine,_large	hotspots	Hotspots
1e-05	Mobilized_CD34_Primary_Cells	2.25061	3e-07	0.811202	0.15834	0.500854	1.12155	60	16319	375	796098	864	UW.Mobilized_CD34_Primary_Cells.ChromatinAccessibility.RO_01492.DS14206.hotspot.twopass.fdr0.01.merge.pks.wig	blood	peaks	Peaks
1e-08	CD34+	2.37293	0.000713	0.864125	0.255314	0.36371	1.36454	23	19479	119	796098	178	CD34-DS16814.hg19.hotspot.twopass.fdr0.01.merge.pks.bed	blood	peaks	Peaks
1e-05	HSMM	1.89912	3.08e-07	0.641391	0.125303	0.395797	0.886985	176	103884	375	796098	102	HSMM_D-all.twopass.merge150.wgt10.zgt2.wig	muscle	hotspots	Hotspots
1e-08	HepG2	2.06687	0.000763	0.726036	0.215701	0.303262	1.14881	51	77469	119	796098	74	HepG2-all.twopass.merge150.wgt10.zgt2.wig	liver	hotspots	Hotspots
1e-05	Mobilized_CD34_Primary_Cells	2.17514	3.25e-07	0.777091	0.152124	0.478927	1.07526	67	19565	375	796098	862	UW.Mobilized_CD34_Primary_Cells.ChromatinAccessibility.RO_01480.DS12771.hotspot.twopass.fdr0.01.merge.pks.wig	blood	peaks	Peaks
1e-08	Chorion	2.02074	0.000782	0.703463	0.209424	0.292993	1.11393	51	88762	119	796098	131	wgEncodeOpenChromDnaseChorionAlnAllReps.30000000.twopass.merge150.wgt10.zgt2.wig	fetal_membrane	hotspots	Hotspots
1e-05	K562	1.83685	3.48e-07	0.608053	0.119327	0.374172	0.841935	133	113648	375	796098	986	seg_TRANSCRIBED_k562	blood	TRANSCRIBED	Chromatin_States
1e-08	Fetal_Muscle_Upper_Trunk	2.25858	0.000819	0.814737	0.243467	0.337542	1.29193	27	28432	119	796098	764	UW.Fetal_Muscle_Upper_Trunk.ChromatinAccessibility.H-23887.DS17664.hotspot.twopass.fdr0.01.merge.pks.wig	fetal_muscle,_upper_trunk	peaks	Peaks
1e-05	Fibroblasts_Fetal_Skin_Abdomen	1.93755	3.62e-07	0.661426	0.129998	0.40663	0.916223	125	59200	375	796098	527	UW.Fibroblasts_Fetal_Skin_Abdomen.ChromatinAccessibility.H-24259.DS19558.twopass.merge150.wgt10.zgt2.wig	fibroblast	hotspots	Hotspots
1e-08	HESC	2.07855	0.000831	0.731672	0.218917	0.302596	1.16075	60	101581	119	796098	75	HESC-all.twopass.merge150.wgt10.zgt2.wig	es_cell	hotspots	Hotspots
1e-05	HMVEC-dBl-Neo	2.20484	3.64e-07	0.790653	0.155423	0.486024	1.09528	64	18535	375	796098	210	HMVEC_dBlNeo-DS13242.hotspot.twopass.fdr0.01.merge.pks.bed	blood_vessel	peaks	Peaks
1e-08	GM12892	2.3477	0.000835	0.853437	0.255437	0.352779	1.35409	23	19583	119	796098	262	wgEncodeOpenChromDnaseGm12892AlnAllReps.30000000.hotspot.twopass.fdr0.01.merge.pks.bed	blood	peaks	Peaks
1e-05	HMVEC-dNeo	1.94322	3.84e-07	0.664349	0.130862	0.407859	0.920839	111	50120	375	796098	89	HMVEC_dNeo-DS12937.twopass.merge150.wgt10.zgt2.wig	blood_vessel	hotspots	Hotspots
1e-08	GM06990	3.04759	0.000878	1.11435	0.334954	0.457842	1.77086	12	5759	119	796098	7	GM06990_footprints.txt	blood	footprints	Footprints
1e-05	CD19_Primary_Cells	2.36539	4.03e-07	0.860942	0.169896	0.527946	1.19394	50	11644	375	796098	595	UW.CD19_Primary_Cells.ChromatinAccessibility.RO_01689.DS17281.hotspot.twopass.fdr0.01.merge.pks.wig	blood	peaks	Peaks
1e-08	Mobilized_CD34_Primary_Cells	2.38663	0.000916	0.869883	0.262407	0.355564	1.3842	21	17182	119	796098	873	UW.Mobilized_CD34_Primary_Cells.ChromatinAccessibility.RO_01562.DS13196.hotspot.twopass.fdr0.01.merge.pks.wig	blood	peaks	Peaks
1e-05	HPAEC	1.92821	4.11e-07	0.656592	0.129663	0.402453	0.91073	126	59086	375	796098	93	HPAEC-DS12916.hg19.twopass.merge150.wgt10.zgt2.wig	blood_vessel	hotspots	Hotspots
1e-08	HCF	2.33684	0.001083	0.848799	0.259732	0.339724	1.35787	23	19753	119	796098	191	HCF-DS12501.hotspot.twopass.fdr0.01.merge.pks.bed	heart	peaks	Peaks
1e-05	K562	2.01861	4.33e-07	0.702407	0.138983	0.43	0.974814	84	38371	375	796098	910	H3K27ac_k562	blood	H3K27ac	Histone_Modifications
1e-08	Fetal_Placenta	2.03118	0.001117	0.708617	0.217413	0.282488	1.13475	46	72290	119	796098	469	UW.Fetal_Placenta.ChromatinAccessibility.H-24409.DS20346.twopass.merge150.wgt10.zgt2.wig	fetal_placenta	hotspots	Hotspots
1e-05	HMVEC-dAd	2.28536	4.5e-07	0.826523	0.16378	0.505514	1.14753	53	14653	375	796098	208	HMVEC_dAd-DS12957.hg19.hotspot.twopass.fdr0.01.merge.pks.bed	blood_vessel	peaks	Peaks
1e-08	Fibroblasts_Fetal_Skin_Scalp	2.08466	0.001121	0.734603	0.225466	0.29269	1.17652	40	50506	119	796098	539	UW.Fibroblasts_Fetal_Skin_Scalp.ChromatinAccessibility.H-24259.DS19449.twopass.merge150.wgt10.zgt2.wig	fibroblast	hotspots	Hotspots
1e-05	Mobilized_CD34_Primary_Cells	2.20228	4.52e-07	0.789493	0.156467	0.482818	1.09617	61	17182	375	796098	873	UW.Mobilized_CD34_Primary_Cells.ChromatinAccessibility.RO_01562.DS13196.hotspot.twopass.fdr0.01.merge.pks.wig	blood	peaks	Peaks
1e-08	Chorion	2.27108	0.001137	0.820254	0.252058	0.32622	1.31429	23	21341	119	796098	256	wgEncodeOpenChromDnaseChorionAlnAllReps.30000000.hotspot.twopass.fdr0.01.merge.pks.bed	fetal_membrane	peaks	Peaks
1e-05	E_myoblast	1.88531	4.71e-07	0.634091	0.125866	0.387394	0.880788	136	69247	375	796098	56	E_myoblast_AllReps.30000000.twopass.merge150.wgt10.zgt2.wig	muscle	hotspots	Hotspots
1e-08	HCM	2.05522	0.001163	0.720384	0.221812	0.285632	1.15514	43	59191	119	796098	68	HCM-DS12599.twopass.merge150.wgt10.zgt2.wig	heart	hotspots	Hotspots
1e-05	Fetal_Placenta	1.87884	6.3e-07	0.630652	0.126591	0.382533	0.878772	142	72833	375	796098	467	UW.Fetal_Placenta.ChromatinAccessibility.H-23914.DS17744.twopass.merge150.wgt10.zgt2.wig	fetal_placenta	hotspots	Hotspots
1e-08	Fetal_Intestine_Large	2.02474	0.001212	0.705444	0.217992	0.278179	1.13271	49	75881	119	796098	346	UW.Fetal_Intestine_Large.ChromatinAccessibility.H-23833.DS17462.twopass.merge150.wgt10.zgt2.wig	fetal_intestine,_large	hotspots	Hotspots
1e-05	HUVEC	1.99592	6.71e-07	0.691105	0.139068	0.418533	0.963678	83	37405	375	796098	947	H3K9ac_huvec	blood_vessel	H3K9ac	Histone_Modifications
1e-08	HUVEC	2.02725	0.001228	0.706678	0.218631	0.278162	1.13519	55	91348	119	796098	105	HUVEC-all.twopass.merge150.wgt10.zgt2.wig	blood_vessel	hotspots	Hotspots
1e-05	NB4	2.18156	7.62e-07	0.780041	0.157751	0.470849	1.08923	62	17042	375	796098	238	NB4-DS12543.hotspot.twopass.fdr0.01.merge.pks.bed	blood	peaks	Peaks
1e-08	Penis_Foreskin_Melanocyte_Primary_Cells	2.04141	0.001252	0.713641	0.221163	0.280162	1.14712	47	74881	119	796098	589	UW.Penis_Foreskin_Melanocyte_Primary_Cells.ChromatinAccessibility.skin01.DS18601.twopass.merge150.wgt10.zgt2.wig	skin	hotspots	Hotspots
1e-05	NB4	2.30262	7.86e-07	0.834047	0.168872	0.503058	1.16504	53	12634	375	796098	32	NB4_footprints.txt	blood	footprints	Footprints
1e-08	Fetal_Kidney	1.99707	0.001289	0.691679	0.214907	0.27046	1.1129	48	74079	119	796098	372	UW.Fetal_Kidney.ChromatinAccessibility.H-23914.DS17753.twopass.merge150.wgt10.zgt2.wig	fetal_kidney	hotspots	Hotspots
1e-05	Myometr	1.86566	7.86e-07	0.623613	0.126271	0.376122	0.871104	137	70781	375	796098	154	wgEncodeOpenChromDnaseMyometrAlnAllReps.30000000.twopass.merge150.wgt10.zgt2.wig	myometrium	hotspots	Hotspots
1e-08	HPAEC	2.0393	0.001351	0.712605	0.222349	0.276801	1.14841	43	59086	119	796098	93	HPAEC-DS12916.hg19.twopass.merge150.wgt10.zgt2.wig	blood_vessel	hotspots	Hotspots
1e-05	HTR8svn	1.88838	7.97e-07	0.635717	0.128792	0.383284	0.88815	122	58208	375	796098	146	wgEncodeOpenChromDnaseHtr8AlnAllReps.30000000.twopass.merge150.wgt10.zgt2.wig	blastula	hotspots	Hotspots
1e-08	Fibroblasts_Fetal_Skin_Back	2.06287	0.001425	0.724098	0.227026	0.279126	1.16907	39	49281	119	796098	529	UW.Fibroblasts_Fetal_Skin_Back.ChromatinAccessibility.H-24218.DS19233.twopass.merge150.wgt10.zgt2.wig	fibroblast	hotspots	Hotspots
1e-05	Fetal_Intestine_Small	1.88904	8.41e-07	0.63607	0.129136	0.382963	0.889178	124	56928	375	796098	355	UW.Fetal_Intestine_Small.ChromatinAccessibility.H-23640.DS16712.twopass.merge150.wgt10.zgt2.wig	fetal_intestine,_small	hotspots	Hotspots
1e-08	Fetal_Placenta	1.99745	0.00151	0.691872	0.218067	0.264461	1.11928	47	70615	119	796098	468	UW.Fetal_Placenta.ChromatinAccessibility.H-24272.DS19391.twopass.merge150.wgt10.zgt2.wig	fetal_placenta	hotspots	Hotspots
1e-05	HEEpiC	1.90627	8.68e-07	0.645148	0.131142	0.38811	0.902186	123	58289	375	796098	72	HEEpiC-DS12763.twopass.merge150.wgt10.zgt2.wig	epithelium	hotspots	Hotspots
1e-08	Fetal_Stomach	1.98381	0.001625	0.685017	0.217364	0.258983	1.11105	51	79286	119	796098	514	UW.Fetal_Stomach.ChromatinAccessibility.H-24401.DS20349.twopass.merge150.wgt10.zgt2.wig	fetal_stomach	hotspots	Hotspots
1e-05	HepG2	1.84925	9.42e-07	0.61478	0.125376	0.369043	0.860518	149	77469	375	796098	74	HepG2-all.twopass.merge150.wgt10.zgt2.wig	liver	hotspots	Hotspots
1e-08	HMVEC-dLy-Neo	2.0184	0.001629	0.702306	0.222908	0.265407	1.13921	39	53425	119	796098	88	HMVEC_dLyNeo-DS13150.twopass.merge150.wgt10.zgt2.wig	blood_vessel	hotspots	Hotspots
1e-05	MCF-7	1.85227	9.51e-07	0.616411	0.12576	0.369922	0.8629	131	69010	375	796098	151	wgEncodeOpenChromDnaseMcf7HypoxlacAlnAllReps.30000000.twopass.merge150.wgt10.zgt2.wig	breast	hotspots	Hotspots
1e-08	Fetal_Muscle_Arm	1.9891	0.001687	0.687681	0.218974	0.258492	1.11687	45	68647	119	796098	428	UW.Fetal_Muscle_Arm.ChromatinAccessibility.H-24143.DS18992.twopass.merge150.wgt10.zgt2.wig	fetal_muscle	hotspots	Hotspots
1e-05	AoAF	1.8969	9.72e-07	0.64022	0.130733	0.383982	0.896457	117	54140	375	796098	48	AoAF-DS13523.twopass.merge150.wgt10.zgt2.wig	blood_vessel	hotspots	Hotspots
1e-08	Fibroblasts_Fetal_Skin_Scalp	2.03824	0.001722	0.712086	0.227182	0.26681	1.15736	39	49151	119	796098	538	UW.Fibroblasts_Fetal_Skin_Scalp.ChromatinAccessibility.H-24259.DS19444.twopass.merge150.wgt10.zgt2.wig	fibroblast	hotspots	Hotspots
1e-05	HMVEC-dLy-Ad	1.9306	9.91e-07	0.657833	0.134431	0.394348	0.921318	100	42817	375	796098	87	HMVEC_dLyAd-DS13261.twopass.merge150.wgt10.zgt2.wig	blood_vessel	hotspots	Hotspots
1e-08	Fetal_Intestine_Small	2.41983	0.001741	0.883697	0.282231	0.330523	1.43687	18	12799	119	796098	660	UW.Fetal_Intestine_Small.ChromatinAccessibility.H-23808.DS17425.hotspot.twopass.fdr0.01.merge.pks.wig	fetal_intestine,_small	peaks	Peaks
1e-05	PanIsletD	2.06222	1.09e-06	0.723783	0.148485	0.432753	1.01481	72	23574	375	796098	281	wgEncodeOpenChromDnasePanisdAlnAllReps.30000000.hotspot.twopass.fdr0.01.merge.pks.bed	pancreas	peaks	Peaks
1e-08	Mobilized_CD8_Primary_Cells	2.41954	0.001745	0.883579	0.282249	0.330371	1.43679	18	12926	119	796098	878	UW.Mobilized_CD8_Primary_Cells.ChromatinAccessibility.RO_01679.DS16962.hotspot.twopass.fdr0.01.merge.pks.wig	blood	peaks	Peaks
1e-05	Fetal_Stomach	1.84907	1.11e-06	0.614682	0.126205	0.367321	0.862044	147	79286	375	796098	514	UW.Fetal_Stomach.ChromatinAccessibility.H-24401.DS20349.twopass.merge150.wgt10.zgt2.wig	fetal_stomach	hotspots	Hotspots
1e-08	Fetal_Muscle_Arm	2.1468	0.001782	0.763979	0.244523	0.284714	1.24324	26	27860	119	796098	719	UW.Fetal_Muscle_Arm.ChromatinAccessibility.H-23941.DS17825.hotspot.twopass.fdr0.01.merge.pks.wig	fetal_muscle	peaks	Peaks
1e-05	Penis_Foreskin_Fibroblast_Primary_Cells	1.88279	1.19e-06	0.632757	0.130279	0.37741	0.888104	119	56159	375	796098	582	UW.Penis_Foreskin_Fibroblast_Primary_Cells.ChromatinAccessibility.skin02.DS18252.twopass.merge150.wgt10.zgt2.wig	fibroblast	hotspots	Hotspots
1e-08	Ishikawa	1.99567	0.001789	0.690981	0.221237	0.257356	1.12461	42	58399	119	796098	108	Ishikawa_T_AllReps.30000000.twopass.merge150.wgt10.zgt2.wig	uterus	hotspots	Hotspots
1e-05	Fibroblasts_Fetal_Skin_Biceps_Right	1.89237	1.24e-06	0.637831	0.131516	0.380059	0.895603	119	54885	375	796098	533	UW.Fibroblasts_Fetal_Skin_Biceps_Right.ChromatinAccessibility.H-24259.DS19761.twopass.merge150.wgt10.zgt2.wig	fibroblast	hotspots	Hotspots
1e-08	Fetal_Stomach	1.97047	0.001802	0.678274	0.217318	0.25233	1.10422	48	73574	119	796098	506	UW.Fetal_Stomach.ChromatinAccessibility.H-23758.DS17172.twopass.merge150.wgt10.zgt2.wig	fetal_stomach	hotspots	Hotspots
1e-05	HNPCEpiC	1.87984	1.36e-06	0.631185	0.130657	0.375097	0.887273	125	59942	375	796098	92	HNPCEpiC-DS12467.twopass.merge150.wgt10.zgt2.wig	epithelium	hotspots	Hotspots
1e-08	NA	2.13897	0.001913	0.760326	0.244998	0.28013	1.24052	71	162066	119	796098	893	upstream_gene_variant	NA	Upstream	Genic
1e-05	HeLa-S3	1.86666	1.45e-06	0.624149	0.12954	0.37025	0.878047	122	58347	375	796098	143	wgEncodeOpenChromDnaseHelas3Ifna4hAlnAllReps.30000000.twopass.merge150.wgt10.zgt2.wig	cervix	hotspots	Hotspots
1e-08	HMVEC-dBl-Ad	2.00275	0.00192	0.694521	0.223876	0.255725	1.13332	38	52435	119	796098	85	HMVEC_dBlAd-DS13337.twopass.merge150.wgt10.zgt2.wig	blood_vessel	hotspots	Hotspots
1e-05	HNPCEpiC	2.07149	1.47e-06	0.728266	0.151244	0.431828	1.0247	70	23253	375	796098	216	HNPCEpiC-DS12467.hotspot.twopass.fdr0.01.merge.pks.bed	epithelium	peaks	Peaks
1e-08	HIPEpiC	1.99731	0.001984	0.691801	0.22369	0.253369	1.13023	43	60646	119	796098	80	HIPEpiC-DS12684.twopass.merge150.wgt10.zgt2.wig	epithelium	hotspots	Hotspots
1e-05	Fetal_Intestine_Small	1.82802	1.47e-06	0.603233	0.125282	0.35768	0.848786	148	79773	375	796098	365	UW.Fetal_Intestine_Small.ChromatinAccessibility.H-23941.DS17808.twopass.merge150.wgt10.zgt2.wig	fetal_intestine,_small	hotspots	Hotspots
1e-08	Osteobl	1.91943	0.00204	0.652027	0.211396	0.23769	1.06636	58	105597	119	796098	155	wgEncodeOpenChromDnaseOsteoblAlnAllReps.30000000.twopass.merge150.wgt10.zgt2.wig	bone	hotspots	Hotspots
1e-05	Penis_Foreskin_Fibroblast_Primary_Cells	1.82947	1.64e-06	0.604028	0.126012	0.357044	0.851012	144	80937	375	796098	580	UW.Penis_Foreskin_Fibroblast_Primary_Cells.ChromatinAccessibility.skin01.DS18224.twopass.merge150.wgt10.zgt2.wig	fibroblast	hotspots	Hotspots
1e-08	Breast_vHMEC	2.22537	0.002136	0.799922	0.260505	0.289333	1.31051	22	20348	119	796098	591	UW.Breast_vHMEC.ChromatinAccessibility.RM035.DS18438.hotspot.twopass.fdr0.01.merge.pks.wig	breast	peaks	Peaks
1e-05	ProgFib	1.81375	1.75e-06	0.595397	0.124547	0.351284	0.839509	152	85682	375	796098	159	wgEncodeOpenChromDnaseProgfibAlnAllReps.30000000.twopass.merge150.wgt10.zgt2.wig	skin	hotspots	Hotspots
1e-08	ProgFib	1.934	0.002144	0.659591	0.214888	0.23841	1.08077	52	85682	119	796098	159	wgEncodeOpenChromDnaseProgfibAlnAllReps.30000000.twopass.merge150.wgt10.zgt2.wig	skin	hotspots	Hotspots
1e-05	Penis_Foreskin_Keratinocyte_Primary_Cells	1.8536	1.79e-06	0.617129	0.129215	0.363868	0.870391	142	73391	375	796098	584	UW.Penis_Foreskin_Keratinocyte_Primary_Cells.ChromatinAccessibility.skin01.DS18692.twopass.merge150.wgt10.zgt2.wig	skin	hotspots	Hotspots
1e-08	Urothelia	1.94325	0.00219	0.664363	0.216891	0.239256	1.08947	49	70667	119	796098	162	wgEncodeOpenChromDnaseUrotsaAlnAllReps.30000000.twopass.merge150.wgt10.zgt2.wig	urothelium	hotspots	Hotspots
1e-05	Mobilized_CD34_Primary_Cells	2.13563	2.06e-06	0.758763	0.159841	0.445475	1.07205	58	16555	375	796098	861	UW.Mobilized_CD34_Primary_Cells.ChromatinAccessibility.RO_00738.DS13199.hotspot.twopass.fdr0.01.merge.pks.wig	blood	peaks	Peaks
1e-08	Gliobla	1.92694	0.002311	0.655935	0.215273	0.233999	1.07787	50	74539	119	796098	135	wgEncodeOpenChromDnaseGlioblaAlnAllReps.30000000.twopass.merge150.wgt10.zgt2.wig	brain	hotspots	Hotspots
1e-05	Fibroblasts_Fetal_Skin_Quadriceps_Right	1.85507	2.08e-06	0.617921	0.130223	0.362683	0.873159	123	59536	375	796098	537	UW.Fibroblasts_Fetal_Skin_Quadriceps_Right.ChromatinAccessibility.H-24259.DS19948.twopass.merge150.wgt10.zgt2.wig	fibroblast	hotspots	Hotspots
1e-08	Myometr	1.93725	0.002331	0.661268	0.217203	0.23555	1.08699	46	70781	119	796098	154	wgEncodeOpenChromDnaseMyometrAlnAllReps.30000000.twopass.merge150.wgt10.zgt2.wig	myometrium	hotspots	Hotspots
1e-05	HPAF	1.85331	2.09e-06	0.616972	0.130038	0.362097	0.871846	122	57932	375	796098	94	HPAF-DS13411.twopass.merge150.wgt10.zgt2.wig	blood_vessel	hotspots	Hotspots
1e-08	Fetal_Renal_Cortex	1.92748	0.002334	0.656215	0.215569	0.2337	1.07873	51	85459	119	796098	472	UW.Fetal_Renal_Cortex.ChromatinAccessibility.H-23833.DS17455.twopass.merge150.wgt10.zgt2.wig	fetal_renal_cortex	hotspots	Hotspots
1e-05	Fetal_Muscle_Arm	1.82509	2.35e-06	0.60163	0.12745	0.351829	0.851432	143	79913	375	796098	418	UW.Fetal_Muscle_Arm.ChromatinAccessibility.H-23808.DS17432.twopass.merge150.wgt10.zgt2.wig	fetal_muscle	hotspots	Hotspots
1e-08	Fetal_Intestine_Large	1.93882	0.00235	0.662078	0.217644	0.235496	1.08866	47	71086	119	796098	352	UW.Fetal_Intestine_Large.ChromatinAccessibility.H-24005.DS17990.twopass.merge150.wgt10.zgt2.wig	fetal_intestine,_large	hotspots	Hotspots
1e-05	CLL	1.81841	2.41e-06	0.597964	0.126811	0.349415	0.846513	129	64342	375	796098	132	wgEncodeOpenChromDnaseCllAlnAllReps.30000000.twopass.merge150.wgt10.zgt2.wig	blood	hotspots	Hotspots
1e-08	Fetal_Muscle_Arm	1.94338	0.00247	0.664427	0.219502	0.234204	1.09465	44	67553	119	796098	424	UW.Fetal_Muscle_Arm.ChromatinAccessibility.H-24078.DS18379.twopass.merge150.wgt10.zgt2.wig	fetal_muscle	hotspots	Hotspots
1e-05	Osteobl	1.77521	2.51e-06	0.573919	0.121921	0.334955	0.812883	166	105597	375	796098	155	wgEncodeOpenChromDnaseOsteoblAlnAllReps.30000000.twopass.merge150.wgt10.zgt2.wig	bone	hotspots	Hotspots
1e-08	PrEC	1.98474	0.002473	0.685487	0.226482	0.241582	1.12939	41	56234	119	796098	121	PrEC-DS12098.hg19.twopass.merge150.wgt10.zgt2.wig	prostate	hotspots	Hotspots
1e-05	HMVEC-dLy-Neo	2.26275	2.75e-06	0.816582	0.174152	0.475244	1.15792	46	11815	375	796098	22	HMVEC-dLy-Neo_footprints.txt	blood_vessel	footprints	Footprints
1e-08	GM12878	2.61709	0.00255	0.962062	0.318845	0.337126	1.587	12	9108	119	796098	993	seg_WEAK_ENHANCER_gm12878	blood	WEAK_ENHANCER	Chromatin_States
1e-05	IMR90	1.83435	2.78e-06	0.606692	0.129466	0.352939	0.860446	123	61093	375	796098	556	UW.IMR90.ChromatinAccessibility.DS13219.twopass.merge150.wgt10.zgt2.wig	lung	hotspots	Hotspots
1e-08	IMR90	1.97268	0.002614	0.679395	0.225729	0.236965	1.12182	39	53301	119	796098	555	UW.IMR90.ChromatinAccessibility.DS11764.twopass.merge150.wgt10.zgt2.wig	lung	hotspots	Hotspots
1e-05	HeLa-S3	1.81612	2.79e-06	0.596704	0.127349	0.3471	0.846307	117	64165	375	796098	929	H3K4me2_helas3	cervix	H3K4me2	Histone_Modifications
1e-08	Fetal_Muscle_Trunk	2.10624	0.002642	0.744905	0.247761	0.259293	1.23052	26	27002	119	796098	760	UW.Fetal_Muscle_Trunk.ChromatinAccessibility.H-23941.DS17827.hotspot.twopass.fdr0.01.merge.pks.wig	fetal_muscle,_trunk	peaks	Peaks
1e-05	HCFaa	2.07802	2.82e-06	0.731415	0.156174	0.425315	1.03752	64	19749	375	796098	190	HCFaa-DS13480.hotspot.twopass.fdr0.01.merge.pks.bed	heart	peaks	Peaks
1e-08	Fetal_Lung	1.94529	0.002706	0.665409	0.221857	0.230568	1.10025	41	57584	119	796098	384	UW.Fetal_Lung.ChromatinAccessibility.H-22676.DS12646.twopass.merge150.wgt10.zgt2.wig	fetal_lung	hotspots	Hotspots
1e-05	HEEpiC	2.01234	3.54e-06	0.699301	0.15081	0.403713	0.994888	72	23389	375	796098	196	HEEpiC-DS12763.hotspot.twopass.fdr0.01.merge.pks.bed	epithelium	peaks	Peaks
1e-08	Fetal_Thymus	2.16259	0.002741	0.771305	0.257495	0.266614	1.276	24	20987	119	796098	821	UW.Fetal_Thymus.ChromatinAccessibility.H-23964.DS17876.hotspot.twopass.fdr0.01.merge.pks.wig	fetal_thymus	peaks	Peaks
1e-05	RWPE1	2.0845	3.55e-06	0.73453	0.158437	0.423993	1.04507	59	17869	375	796098	248	RWPE_AllReps.30000000.hotspot.twopass.fdr0.01.merge.pks.bed	prostate	peaks	Peaks
1e-08	NHLF	2.25334	0.002819	0.812413	0.271998	0.279297	1.34553	21	17720	119	796098	36	NHLF_footprints.txt	lung	footprints	Footprints
1e-05	HepG2	1.74424	3.56e-06	0.556318	0.120013	0.321092	0.791544	114	91660	375	796098	914	H3K27me3_hepg2	liver	H3K27me3	Histone_Modifications
1e-08	MCF-7	2.20687	0.00286	0.791573	0.265417	0.271356	1.31179	20	17972	119	796098	276	wgEncodeOpenChromDnaseMcf7HypoxlacAlnAllReps.30000000.hotspot.twopass.fdr0.01.merge.pks.bed	breast	peaks	Peaks
1e-05	HeLa-S3	1.85856	3.68e-06	0.619802	0.133901	0.357357	0.882247	90	45088	375	796098	935	H3K4me3_helas3	cervix	H3K4me3	Histone_Modifications
1e-08	K562	1.96649	0.002941	0.676252	0.227398	0.230552	1.12195	33	47583	119	796098	932	H3K4me2_k562	blood	H3K4me2	Histone_Modifications
1e-05	Fetal_Stomach	1.79478	3.91e-06	0.584882	0.126707	0.336536	0.833227	139	75529	375	796098	515	UW.Fetal_Stomach.ChromatinAccessibility.H-24507.DS20546.twopass.merge150.wgt10.zgt2.wig	fetal_stomach	hotspots	Hotspots
1e-08	Fetal_Muscle_Leg	1.94744	0.002941	0.666515	0.224127	0.227226	1.1058	39	56650	119	796098	452	UW.Fetal_Muscle_Leg.ChromatinAccessibility.H-24143.DS18844.twopass.merge150.wgt10.zgt2.wig	fetal_muscle	hotspots	Hotspots
1e-05	AG10803	1.85204	3.94e-06	0.616289	0.133556	0.35452	0.878058	107	47637	375	796098	47	AG10803-DS12384.twopass.merge150.wgt10.zgt2.wig	skin	hotspots	Hotspots
1e-08	Fetal_Muscle_Leg	1.8964	0.002994	0.639957	0.215592	0.217396	1.06252	48	83615	119	796098	459	UW.Fetal_Muscle_Leg.ChromatinAccessibility.H-24409.DS20239.twopass.merge150.wgt10.zgt2.wig	fetal_muscle	hotspots	Hotspots
1e-05	GM12892	2.03949	4.05e-06	0.7127	0.154634	0.409617	1.01578	62	19583	375	796098	262	wgEncodeOpenChromDnaseGm12892AlnAllReps.30000000.hotspot.twopass.fdr0.01.merge.pks.bed	blood	peaks	Peaks
1e-08	8988T	1.86514	0.003078	0.623337	0.210599	0.210563	1.03611	52	89624	119	796098	129	wgEncodeOpenChromDnase8988tAlnAllReps.30000000.twopass.merge150.wgt10.zgt2.wig	liver	hotspots	Hotspots
1e-05	K562	2.22653	4.18e-06	0.800446	0.173918	0.459567	1.14132	47	13604	375	796098	968	seg_ENHANCER_k562	blood	ENHANCER	Chromatin_States
1e-08	GM12864	2.22714	0.003188	0.800716	0.271521	0.268536	1.3329	20	16242	119	796098	182	GM12864-DS12431.hotspot.twopass.fdr0.01.merge.pks.bed	blood	peaks	Peaks
1e-05	Urothelia	1.78789	4.27e-06	0.581034	0.126374	0.333341	0.828728	136	70667	375	796098	162	wgEncodeOpenChromDnaseUrotsaAlnAllReps.30000000.twopass.merge150.wgt10.zgt2.wig	urothelium	hotspots	Hotspots
1e-08	HPAF	2.14859	0.003273	0.764811	0.260065	0.255083	1.27454	23	21317	119	796098	218	HPAF-DS13411.hotspot.twopass.fdr0.01.merge.pks.bed	blood_vessel	peaks	Peaks
1e-05	NA	2.14833	4.32e-06	0.764693	0.166408	0.438533	1.09085	52	16128	375	796098	889	exon	NA	Exon	Genic
1e-08	HVMF	2.29408	0.003283	0.830334	0.282432	0.276768	1.3839	19	14468	119	796098	29	HVMF_footprints.txt	connective	footprints	Footprints
1e-05	Fetal_Thymus	2.126	4.36e-06	0.754244	0.164206	0.4324	1.07609	58	15264	375	796098	817	UW.Fetal_Thymus.ChromatinAccessibility.H-23663.DS16841.hotspot.twopass.fdr0.01.merge.pks.wig	fetal_thymus	peaks	Peaks
1e-08	Fetal_Muscle_Arm	1.90617	0.003294	0.645095	0.219504	0.214868	1.07532	48	79913	119	796098	418	UW.Fetal_Muscle_Arm.ChromatinAccessibility.H-23808.DS17432.twopass.merge150.wgt10.zgt2.wig	fetal_muscle	hotspots	Hotspots
1e-05	Fetal_Intestine_Small	1.78097	4.71e-06	0.577157	0.126096	0.33001	0.824305	145	81182	375	796098	354	UW.Fetal_Intestine_Small.ChromatinAccessibility.H-23604.DS16559.twopass.merge150.wgt10.zgt2.wig	fetal_intestine,_small	hotspots	Hotspots
1e-08	Fetal_Stomach	1.89779	0.003297	0.640693	0.218027	0.21336	1.06803	49	75529	119	796098	515	UW.Fetal_Stomach.ChromatinAccessibility.H-24507.DS20546.twopass.merge150.wgt10.zgt2.wig	fetal_stomach	hotspots	Hotspots
1e-05	HUVEC	1.75793	4.72e-06	0.564138	0.12326	0.322548	0.805728	130	85603	375	796098	925	H3K4me1_huvec	blood_vessel	H3K4me1	Histone_Modifications
1e-08	Fetal_Renal_Pelvis	1.87122	0.003317	0.62659	0.213365	0.208396	1.04479	51	87189	119	796098	487	UW.Fetal_Renal_Pelvis.ChromatinAccessibility.H-23914.DS17760.twopass.merge150.wgt10.zgt2.wig	fetal_renal_pelvis	hotspots	Hotspots
1e-05	Fetal_Intestine_Small	1.77802	4.75e-06	0.575498	0.125782	0.328966	0.82203	143	77176	375	796098	362	UW.Fetal_Intestine_Small.ChromatinAccessibility.H-23864.DS17844.twopass.merge150.wgt10.zgt2.wig	fetal_intestine,_small	hotspots	Hotspots
1e-08	Urothelia	1.88453	0.003371	0.63368	0.21615	0.210026	1.05733	47	76308	119	796098	163	wgEncodeOpenChromDnaseUrotsaUt189AlnAllReps.30000000.twopass.merge150.wgt10.zgt2.wig	urothelium	hotspots	Hotspots
1e-05	Fetal_Muscle_Back	1.91228	4.78e-06	0.648298	0.141734	0.370499	0.926097	85	33043	375	796098	734	UW.Fetal_Muscle_Back.ChromatinAccessibility.H-23914.DS17767.hotspot.twopass.fdr0.01.merge.pks.wig	fetal_muscle	peaks	Peaks
1e-08	Fetal_Renal_Cortex_Left	1.88442	0.003617	0.633621	0.217759	0.206812	1.06043	47	74697	119	796098	480	UW.Fetal_Renal_Cortex_Left.ChromatinAccessibility.H-24169.DS18931.twopass.merge150.wgt10.zgt2.wig	fetal_renal_cortex	hotspots	Hotspots
1e-05	CD20+	2.45251	4.82e-06	0.897112	0.196204	0.512552	1.28167	36	7146	375	796098	2	CD20+_footprints.txt	blood	footprints	Footprints
1e-08	Fetal_Renal_Cortex	2.00667	0.003647	0.696479	0.239572	0.226918	1.16604	29	32902	119	796098	771	UW.Fetal_Renal_Cortex.ChromatinAccessibility.H-23833.DS17455.hotspot.twopass.fdr0.01.merge.pks.wig	fetal_renal_cortex	peaks	Peaks
1e-05	HeLa-S3	1.8725	4.83e-06	0.627273	0.137195	0.358371	0.896175	83	41346	375	796098	945	H3K9ac_helas3	cervix	H3K9ac	Histone_Modifications
1e-08	HSMM	1.87818	0.00371	0.630302	0.217212	0.204567	1.05604	58	103884	119	796098	102	HSMM_D-all.twopass.merge150.wgt10.zgt2.wig	muscle	hotspots	Hotspots
1e-05	HCFaa	1.81859	4.87e-06	0.598061	0.13086	0.341575	0.854546	126	63377	375	796098	66	HCFaa-DS13480.twopass.merge150.wgt10.zgt2.wig	heart	hotspots	Hotspots
1e-08	LNCaP	1.89327	0.003804	0.638308	0.220565	0.206001	1.07061	55	95187	119	796098	111	LNCap-all.twopass.merge150.wgt10.zgt2.wig	prostate	hotspots	Hotspots
1e-05	PANC-1	1.82868	4.93e-06	0.603594	0.132141	0.344597	0.862591	115	53764	375	796098	120	PANC1-DS9955.twopass.merge150.wgt10.zgt2.wig	pancreas	hotspots	Hotspots
1e-08	Fetal_Intestine_Large	2.08288	0.00387	0.733749	0.254019	0.235872	1.23163	23	23148	119	796098	651	UW.Fetal_Intestine_Large.ChromatinAccessibility.H-24005.DS17990.hotspot.twopass.fdr0.01.merge.pks.wig	fetal_intestine,_large	peaks	Peaks
1e-05	HBMEC	1.80405	5.01e-06	0.590032	0.129266	0.336671	0.843392	129	67578	375	796098	65	HBMEC-DS13817.twopass.merge150.wgt10.zgt2.wig	blood_vessel	hotspots	Hotspots
1e-08	IMR90	1.92144	0.004198	0.653072	0.228118	0.205962	1.10018	37	50483	119	796098	554	UW.IMR90.ChromatinAccessibility.DS11759.twopass.merge150.wgt10.zgt2.wig	lung	hotspots	Hotspots
1e-05	CD19_Primary_Cells	2.17394	5.01e-06	0.77654	0.170138	0.443069	1.11001	50	12694	375	796098	594	UW.CD19_Primary_Cells.ChromatinAccessibility.RO_01679.DS17186.hotspot.twopass.fdr0.01.merge.pks.wig	blood	peaks	Peaks
1e-08	Fetal_Intestine_Large	1.86659	0.004362	0.624114	0.218933	0.195005	1.05322	47	76061	119	796098	353	UW.Fetal_Intestine_Large.ChromatinAccessibility.H-24111.DS18499.twopass.merge150.wgt10.zgt2.wig	fetal_intestine,_large	hotspots	Hotspots
1e-05	HPF	1.83137	5.04e-06	0.605066	0.132605	0.34516	0.864972	108	50034	375	796098	96	HPF-DS13390.twopass.merge150.wgt10.zgt2.wig	lung	hotspots	Hotspots
1e-08	Fetal_Lung	2.10492	0.004384	0.744276	0.261231	0.232263	1.25629	21	20969	119	796098	683	UW.Fetal_Lung.ChromatinAccessibility.H-22676.DS12646.hotspot.twopass.fdr0.01.merge.pks.wig	fetal_lung	peaks	Peaks
1e-05	Gliobla	2.02939	5.22e-06	0.707735	0.155349	0.403252	1.01222	63	19195	375	796098	260	wgEncodeOpenChromDnaseGlioblaAlnAllReps.30000000.hotspot.twopass.fdr0.01.merge.pks.bed	brain	peaks	Peaks
1e-08	H1_Derived_Mesenchymal_Stem_Cells	1.87313	0.004419	0.627612	0.220479	0.195474	1.05975	42	64234	119	796098	549	UW.H1_Derived_Mesenchymal_Stem_Cells.ChromatinAccessibility.DS21042.twopass.merge150.wgt10.zgt2.wig	es_cell	hotspots	Hotspots
1e-05	Fetal_Muscle_Back	1.78371	5.42e-06	0.578696	0.127244	0.329297	0.828095	135	75327	375	796098	443	UW.Fetal_Muscle_Back.ChromatinAccessibility.H-24244.DS19283.twopass.merge150.wgt10.zgt2.wig	fetal_muscle	hotspots	Hotspots
1e-08	Fetal_Intestine_Small	2.04171	0.00453	0.713787	0.251452	0.220941	1.20663	24	24766	119	796098	664	UW.Fetal_Intestine_Small.ChromatinAccessibility.H-23941.DS17808.hotspot.twopass.fdr0.01.merge.pks.wig	fetal_intestine,_small	peaks	Peaks
1e-05	HUVEC	1.83365	6e-06	0.606311	0.133954	0.343761	0.868861	93	50050	375	796098	909	H3K27ac_huvec	blood_vessel	H3K27ac	Histone_Modifications
1e-08	Fetal_Placenta	1.84305	0.00459	0.611421	0.215709	0.188631	1.03421	53	92509	119	796098	466	UW.Fetal_Placenta.ChromatinAccessibility.H-23887.DS17639.twopass.merge150.wgt10.zgt2.wig	fetal_placenta	hotspots	Hotspots
1e-05	HESC	1.76944	6.08e-06	0.570665	0.126156	0.323398	0.817932	173	101581	375	796098	75	HESC-all.twopass.merge150.wgt10.zgt2.wig	es_cell	hotspots	Hotspots
1e-08	HMVEC-dLy-Neo	2.30672	0.004619	0.835825	0.295089	0.257451	1.4142	15	11815	119	796098	22	HMVEC-dLy-Neo_footprints.txt	blood_vessel	footprints	Footprints
1e-05	Fibroblasts_Fetal_Skin_Biceps_Left	1.82214	6.19e-06	0.600012	0.132751	0.33982	0.860204	113	53832	375	796098	530	UW.Fibroblasts_Fetal_Skin_Biceps_Left.ChromatinAccessibility.H-24259.DS19857.twopass.merge150.wgt10.zgt2.wig	fibroblast	hotspots	Hotspots
1e-08	HCM	2.08298	0.004744	0.733798	0.25985	0.224492	1.2431	22	21694	119	796098	192	HCM-DS12599.hotspot.twopass.fdr0.01.merge.pks.bed	heart	peaks	Peaks
1e-05	T-47D	2.0555	6.32e-06	0.720521	0.159568	0.407767	1.03327	57	17301	375	796098	286	wgEncodeOpenChromDnaseT47dAlnAllReps.30000000.hotspot.twopass.fdr0.01.merge.pks.bed	breast	peaks	Peaks
1e-08	HMVEC-LLy	2.35253	0.004745	0.855493	0.302955	0.261702	1.44928	14	10695	119	796098	23	HMVEC-LLy_footprints.txt	blood_vessel	footprints	Footprints
1e-05	Fetal_Muscle_Upper_Limb_Skeletal	1.97092	6.37e-06	0.678501	0.150324	0.383865	0.973137	72	24309	375	796098	763	UW.Fetal_Muscle_Upper_Limb_Skeletal.ChromatinAccessibility.H-23887.DS17661.hotspot.twopass.fdr0.01.merge.pks.wig	fetal_muscle	peaks	Peaks
1e-08	Fetal_Muscle_Leg	1.99462	0.004897	0.690451	0.245388	0.209491	1.17141	26	30410	119	796098	758	UW.Fetal_Muscle_Leg.ChromatinAccessibility.H-24409.DS20239.hotspot.twopass.fdr0.01.merge.pks.wig	fetal_muscle	peaks	Peaks
1e-05	Fetal_Lung	1.79683	6.43e-06	0.586022	0.12989	0.331437	0.840607	118	57584	375	796098	384	UW.Fetal_Lung.ChromatinAccessibility.H-22676.DS12646.twopass.merge150.wgt10.zgt2.wig	fetal_lung	hotspots	Hotspots
1e-08	HPF	2.1415	0.005079	0.761506	0.271776	0.228826	1.29419	21	17878	119	796098	220	HPF-DS13390.hotspot.twopass.fdr0.01.merge.pks.bed	lung	peaks	Peaks
1e-05	HUVEC	1.95793	6.46e-06	0.671886	0.148956	0.379933	0.963839	66	27431	375	796098	967	seg_ENHANCER_huvec	blood_vessel	ENHANCER	Chromatin_States
1e-08	Fetal_Intestine_Large	1.86225	0.00515	0.621787	0.222267	0.186143	1.05743	42	59677	119	796098	350	UW.Fetal_Intestine_Large.ChromatinAccessibility.H-23941.DS17785.twopass.merge150.wgt10.zgt2.wig	fetal_intestine,_large	hotspots	Hotspots
1e-05	Fibroblasts_Fetal_Skin_Quadriceps_Left	1.80548	6.49e-06	0.590824	0.131009	0.334046	0.847602	122	60046	375	796098	534	UW.Fibroblasts_Fetal_Skin_Quadriceps_Left.ChromatinAccessibility.H-24259.DS20046.twopass.merge150.wgt10.zgt2.wig	fibroblast	hotspots	Hotspots
1e-08	H1_Derived_Mesenchymal_Stem_Cells	2.08763	0.005158	0.736031	0.26315	0.220257	1.25181	21	20659	119	796098	847	UW.H1_Derived_Mesenchymal_Stem_Cells.ChromatinAccessibility.DS20671.hotspot.twopass.fdr0.01.merge.pks.wig	es_cell	peaks	Peaks
1e-05	H1_Derived_Mesenchymal_Stem_Cells	1.78444	6.66e-06	0.579103	0.128571	0.327104	0.831102	122	64234	375	796098	549	UW.H1_Derived_Mesenchymal_Stem_Cells.ChromatinAccessibility.DS21042.twopass.merge150.wgt10.zgt2.wig	es_cell	hotspots	Hotspots
1e-08	Fetal_Heart	2.00107	0.005261	0.693683	0.24858	0.206466	1.1809	25	28465	119	796098	637	UW.Fetal_Heart.ChromatinAccessibility.H-24042.DS19427.hotspot.twopass.fdr0.01.merge.pks.wig	fetal_heart	peaks	Peaks
1e-05	WI-38	1.822	6.73e-06	0.599935	0.133254	0.338757	0.861113	107	49308	375	796098	164	WI_38-DS14315.twopass.merge150.wgt10.zgt2.wig	embryonic_lung	hotspots	Hotspots
1e-08	HUVEC	2.02521	0.00527	0.705675	0.252926	0.20994	1.20141	23	27431	119	796098	967	seg_ENHANCER_huvec	blood_vessel	ENHANCER	Chromatin_States
1e-05	HPAEC	2.11579	7.87e-06	0.749429	0.167704	0.420728	1.07813	51	14272	375	796098	217	HPAEC-DS12916.hg19.hotspot.twopass.fdr0.01.merge.pks.bed	blood_vessel	peaks	Peaks
1e-08	HMVEC-dAd	2.19697	0.005277	0.787078	0.282142	0.234078	1.34008	17	14653	119	796098	208	HMVEC_dAd-DS12957.hg19.hotspot.twopass.fdr0.01.merge.pks.bed	blood_vessel	peaks	Peaks
1e-05	HUVEC	1.78286	7.88e-06	0.578219	0.129401	0.324593	0.831845	109	61089	375	796098	931	H3K4me2_huvec	blood_vessel	H3K4me2	Histone_Modifications
1e-08	AG09309	1.87073	0.005689	0.626327	0.226506	0.182375	1.07028	39	53854	119	796098	45	AG09309-DS12352.twopass.merge150.wgt10.zgt2.wig	skin	hotspots	Hotspots
1e-05	Gliobla	1.75107	7.96e-06	0.56023	0.125438	0.314371	0.806088	137	74539	375	796098	135	wgEncodeOpenChromDnaseGlioblaAlnAllReps.30000000.twopass.merge150.wgt10.zgt2.wig	brain	hotspots	Hotspots
1e-08	AG10803	1.88305	0.005699	0.632892	0.228924	0.184201	1.08158	35	47637	119	796098	47	AG10803-DS12384.twopass.merge150.wgt10.zgt2.wig	skin	hotspots	Hotspots
1e-05	HUVEC	2.18178	8.32e-06	0.780141	0.175047	0.43705	1.12323	45	12635	375	796098	991	seg_TSS_huvec	blood_vessel	TSS	Chromatin_States
1e-08	CLL	1.82674	0.005751	0.602535	0.218179	0.174904	1.03017	43	64342	119	796098	132	wgEncodeOpenChromDnaseCllAlnAllReps.30000000.twopass.merge150.wgt10.zgt2.wig	blood	hotspots	Hotspots
1e-05	Fetal_Muscle_Arm	1.7632	8.4e-06	0.567128	0.127309	0.317604	0.816653	137	77411	375	796098	427	UW.Fetal_Muscle_Arm.ChromatinAccessibility.H-24125.DS18559.twopass.merge150.wgt10.zgt2.wig	fetal_muscle	hotspots	Hotspots
1e-08	Fetal_Muscle_Back	2.01496	0.005758	0.7006	0.253724	0.203301	1.1979	24	25495	119	796098	746	UW.Fetal_Muscle_Back.ChromatinAccessibility.H-24409.DS20244.hotspot.twopass.fdr0.01.merge.pks.wig	fetal_muscle	peaks	Peaks
1e-05	NHLF	1.98208	8.83e-06	0.684149	0.153946	0.382415	0.985883	65	22594	375	796098	243	NHLF-DS12829.hotspot.twopass.fdr0.01.merge.pks.bed	lung	peaks	Peaks
1e-08	Fetal_Intestine_Large	1.83201	0.005817	0.605415	0.219518	0.17516	1.03567	44	65966	119	796098	345	UW.Fetal_Intestine_Large.ChromatinAccessibility.H-23808.DS17422.twopass.merge150.wgt10.zgt2.wig	fetal_intestine,_large	hotspots	Hotspots
1e-05	Fibroblasts_Fetal_Skin_Biceps_Right	1.81497	8.89e-06	0.596071	0.134172	0.333094	0.859048	108	49802	375	796098	532	UW.Fibroblasts_Fetal_Skin_Biceps_Right.ChromatinAccessibility.H-24259.DS19745.twopass.merge150.wgt10.zgt2.wig	fibroblast	hotspots	Hotspots
1e-08	H1_Derived_Mesenchymal_Stem_Cells	1.85688	0.005908	0.618895	0.224822	0.178244	1.05955	39	56102	119	796098	548	UW.H1_Derived_Mesenchymal_Stem_Cells.ChromatinAccessibility.DS20671.twopass.merge150.wgt10.zgt2.wig	es_cell	hotspots	Hotspots
1e-05	Fetal_Lung_Right	1.74963	9.78e-06	0.559406	0.126507	0.311452	0.807359	144	81850	375	796098	408	UW.Fetal_Lung_Right.ChromatinAccessibility.H-23435.DS15632.twopass.merge150.wgt10.zgt2.wig	fetal_lung	hotspots	Hotspots
1e-08	Fetal_Intestine_Small	1.81377	0.006013	0.595406	0.216743	0.17059	1.02022	49	77176	119	796098	362	UW.Fetal_Intestine_Small.ChromatinAccessibility.H-23864.DS17844.twopass.merge150.wgt10.zgt2.wig	fetal_intestine,_small	hotspots	Hotspots
1e-05	pHTE	1.87607	9.79e-06	0.62918	0.142291	0.350289	0.908071	83	30935	375	796098	283	wgEncodeOpenChromDnasePhteAlnAllReps.30000000.hotspot.twopass.fdr0.01.merge.pks.bed	epithelium	peaks	Peaks
1e-08	Fetal_Stomach	2.02523	0.006135	0.705681	0.257505	0.200971	1.21039	22	22613	119	796098	810	UW.Fetal_Stomach.ChromatinAccessibility.H-24005.DS17963.hotspot.twopass.fdr0.01.merge.pks.wig	fetal_stomach	peaks	Peaks
1e-05	Fetal_Intestine_Large	1.75037	1.04e-05	0.559828	0.126995	0.310917	0.808739	136	71086	375	796098	352	UW.Fetal_Intestine_Large.ChromatinAccessibility.H-24005.DS17990.twopass.merge150.wgt10.zgt2.wig	fetal_intestine,_large	hotspots	Hotspots
1e-08	GM12878	2.80244	0.006217	1.03049	0.376625	0.292307	1.76867	8	7389	119	796098	951	H4K20me1_gm12878	blood	H4K20me1	Histone_Modifications
1e-05	K562	1.81325	1.08e-05	0.595121	0.135216	0.330097	0.860145	106	43879	375	796098	1004	tfbs_k562	blood	tfbs	TFBS
1e-08	NB4	2.10197	0.006238	0.742875	0.271617	0.210507	1.27524	20	17042	119	796098	238	NB4-DS12543.hotspot.twopass.fdr0.01.merge.pks.bed	blood	peaks	Peaks
1e-05	Fetal_Stomach	1.74189	1.1e-05	0.554974	0.126203	0.307617	0.802331	140	76040	375	796098	512	UW.Fetal_Stomach.ChromatinAccessibility.H-24078.DS18389.twopass.merge150.wgt10.zgt2.wig	fetal_stomach	hotspots	Hotspots
1e-08	Fetal_Renal_Pelvis	1.83423	0.006308	0.606626	0.2221	0.171311	1.04194	39	56416	119	796098	488	UW.Fetal_Renal_Pelvis.ChromatinAccessibility.H-24005.DS18088.twopass.merge150.wgt10.zgt2.wig	fetal_renal_pelvis	hotspots	Hotspots
1e-05	FibroP	1.7479	1.1e-05	0.558416	0.127033	0.309431	0.807402	159	92803	375	796098	134	wgEncodeOpenChromDnaseFibropAlnAllReps.30000000.twopass.merge150.wgt10.zgt2.wig	skin	hotspots	Hotspots
1e-08	Fetal_Renal_Pelvis	1.80095	0.006342	0.588314	0.215533	0.165869	1.01076	49	83918	119	796098	485	UW.Fetal_Renal_Pelvis.ChromatinAccessibility.H-23790.DS17381.twopass.merge150.wgt10.zgt2.wig	fetal_renal_pelvis	hotspots	Hotspots
1e-05	Chorion	1.70899	1.11e-05	0.535903	0.121938	0.296904	0.774902	142	88762	375	796098	131	wgEncodeOpenChromDnaseChorionAlnAllReps.30000000.twopass.merge150.wgt10.zgt2.wig	fetal_membrane	hotspots	Hotspots
1e-08	K562	2.66919	0.006394	0.981774	0.360037	0.276101	1.68745	10	6003	119	796098	998	seg_WEAK_ENHANCER_k562	blood	WEAK_ENHANCER	Chromatin_States
1e-05	Fetal_Lung_Right	1.73017	1.16e-05	0.548219	0.125004	0.303211	0.793226	157	97126	375	796098	414	UW.Fetal_Lung_Right.ChromatinAccessibility.H-23964.DS17831.twopass.merge150.wgt10.zgt2.wig	fetal_lung	hotspots	Hotspots
1e-08	HMVEC-LBl	2.07176	0.006601	0.728399	0.268154	0.202817	1.25398	20	18703	119	796098	214	HMVEC_LBl-DS13372.hotspot.twopass.fdr0.01.merge.pks.bed	blood_vessel	peaks	Peaks
1e-05	WI-38	1.75423	1.17e-05	0.562032	0.12824	0.310681	0.813383	128	67435	375	796098	165	WI_38_TAM-DS14323.twopass.merge150.wgt10.zgt2.wig	embryonic_lung	hotspots	Hotspots
1e-08	Fetal_Intestine_Small	1.79761	0.007013	0.586458	0.217512	0.160135	1.01278	48	81182	119	796098	354	UW.Fetal_Intestine_Small.ChromatinAccessibility.H-23604.DS16559.twopass.merge150.wgt10.zgt2.wig	fetal_intestine,_small	hotspots	Hotspots
1e-05	Fetal_Muscle_Leg	1.90806	1.19e-05	0.646087	0.147529	0.356929	0.935245	75	27804	375	796098	750	UW.Fetal_Muscle_Leg.ChromatinAccessibility.H-24111.DS18471.hotspot.twopass.fdr0.01.merge.pks.wig	fetal_muscle	peaks	Peaks
1e-08	Melano	1.82341	0.007059	0.600707	0.222977	0.163671	1.03774	58	100195	119	796098	153	wgEncodeOpenChromDnaseMelanoAlnAllReps.30000000.twopass.merge150.wgt10.zgt2.wig	skin	hotspots	Hotspots
1e-05	Fetal_Intestine_Small	1.75795	1.28e-05	0.564147	0.129311	0.310698	0.817596	129	66335	375	796098	366	UW.Fetal_Intestine_Small.ChromatinAccessibility.H-24111.DS18495.twopass.merge150.wgt10.zgt2.wig	fetal_intestine,_small	hotspots	Hotspots
1e-08	K562	1.8159	0.007074	0.596578	0.221502	0.162435	1.03072	35	60355	119	796098	904	H2AFZ_k562	blood	H2AFZ	Histone_Modifications
1e-05	Fetal_Placenta	1.74162	1.34e-05	0.554813	0.127461	0.30499	0.804637	135	70615	375	796098	468	UW.Fetal_Placenta.ChromatinAccessibility.H-24272.DS19391.twopass.merge150.wgt10.zgt2.wig	fetal_placenta	hotspots	Hotspots
1e-08	Fetal_Intestine_Large	1.79717	0.0073	0.586216	0.218507	0.157942	1.01449	46	74132	119	796098	341	UW.Fetal_Intestine_Large.ChromatinAccessibility.H-23604.DS16563.twopass.merge150.wgt10.zgt2.wig	fetal_intestine,_large	hotspots	Hotspots
1e-05	HMVEC-dAd	1.76675	1.37e-05	0.569144	0.130897	0.312586	0.825702	116	55393	375	796098	84	HMVEC_dAd-DS12957.hg19.twopass.merge150.wgt10.zgt2.wig	blood_vessel	hotspots	Hotspots
1e-08	Ishikawa	1.82744	0.007311	0.602917	0.224774	0.16236	1.04347	39	55642	119	796098	107	Ishikawa_E_AllReps.30000000.twopass.merge150.wgt10.zgt2.wig	uterus	hotspots	Hotspots
1e-05	Fetal_Intestine_Large	1.75779	1.39e-05	0.564058	0.129818	0.309615	0.818502	123	59677	375	796098	350	UW.Fetal_Intestine_Large.ChromatinAccessibility.H-23941.DS17785.twopass.merge150.wgt10.zgt2.wig	fetal_intestine,_large	hotspots	Hotspots
1e-08	HMF	1.84217	0.007427	0.610947	0.228213	0.163648	1.05825	37	50162	119	796098	83	HMF-DS13363.twopass.merge150.wgt10.zgt2.wig	breast	hotspots	Hotspots
1e-05	Fibroblasts_Fetal_Skin_Back	1.79039	1.41e-05	0.582432	0.134109	0.319578	0.845286	106	49281	375	796098	529	UW.Fibroblasts_Fetal_Skin_Back.ChromatinAccessibility.H-24218.DS19233.twopass.merge150.wgt10.zgt2.wig	fibroblast	hotspots	Hotspots
1e-08	Fetal_Lung_Right	1.94663	0.007435	0.666097	0.248849	0.178353	1.15384	25	28288	119	796098	712	UW.Fetal_Lung_Right.ChromatinAccessibility.H-23887.DS17670.hotspot.twopass.fdr0.01.merge.pks.wig	fetal_lung	peaks	Peaks
1e-05	Fetal_Muscle_Back	1.93735	1.41e-05	0.661319	0.152287	0.362836	0.959802	68	23938	375	796098	740	UW.Fetal_Muscle_Back.ChromatinAccessibility.H-24143.DS18842.hotspot.twopass.fdr0.01.merge.pks.wig	fetal_muscle	peaks	Peaks
1e-08	Penis_Foreskin_Melanocyte_Primary_Cells	1.8246	0.007546	0.601363	0.225084	0.160197	1.04253	41	62419	119	796098	588	UW.Penis_Foreskin_Melanocyte_Primary_Cells.ChromatinAccessibility.skin01.DS18590.twopass.merge150.wgt10.zgt2.wig	skin	hotspots	Hotspots
1e-05	HUVEC	1.90204	1.41e-05	0.642929	0.14807	0.352712	0.933145	67	28379	375	796098	937	H3K4me3_huvec	blood_vessel	H3K4me3	Histone_Modifications
1e-08	HA-h	2.24362	0.007576	0.808092	0.302608	0.21498	1.40121	14	11415	119	796098	11	HA-h_footprints.txt	brain_hippocampus	footprints	Footprints
1e-05	HRGEC	1.77544	1.41e-05	0.574049	0.132222	0.314893	0.833205	116	55680	375	796098	99	HRGEC-DS13716.twopass.merge150.wgt10.zgt2.wig	kidney	hotspots	Hotspots
1e-08	Fetal_Muscle_Arm	1.79132	0.007669	0.582952	0.218636	0.154425	1.01148	47	81454	119	796098	432	UW.Fetal_Muscle_Arm.ChromatinAccessibility.H-24259.DS19295.twopass.merge150.wgt10.zgt2.wig	fetal_muscle	hotspots	Hotspots
1e-05	HVMF	1.77598	1.42e-05	0.574354	0.1323	0.315046	0.833663	113	54541	375	796098	106	HVMF-DS13981.twopass.merge150.wgt10.zgt2.wig	connective	hotspots	Hotspots
1e-08	HCPEpiC	1.82276	0.007735	0.60035	0.225407	0.158552	1.04215	40	58118	119	796098	70	HCPEpiC-DS12447.twopass.merge150.wgt10.zgt2.wig	epithelium	hotspots	Hotspots
1e-05	NHLF	1.76082	1.44e-05	0.565778	0.13045	0.310096	0.821461	121	61608	375	796098	118	NHLF-DS12829.twopass.merge150.wgt10.zgt2.wig	lung	hotspots	Hotspots
1e-08	Fetal_Muscle_Leg	1.95311	0.007751	0.669421	0.251403	0.176671	1.16217	25	27761	119	796098	755	UW.Fetal_Muscle_Leg.ChromatinAccessibility.H-24259.DS19291.hotspot.twopass.fdr0.01.merge.pks.wig	fetal_muscle	peaks	Peaks
1e-05	HeLa-S3	1.83482	1.45e-05	0.606947	0.139986	0.332574	0.881319	79	39208	375	796098	907	H3K27ac_helas3	cervix	H3K27ac	Histone_Modifications
1e-08	Fetal_Muscle_Arm	1.76607	0.007884	0.568755	0.21406	0.149198	0.988312	54	107101	119	796098	422	UW.Fetal_Muscle_Arm.ChromatinAccessibility.H-24005.DS18080.twopass.merge150.wgt10.zgt2.wig	fetal_muscle	hotspots	Hotspots
1e-05	GM06990	2.49321	1.49e-05	0.913569	0.210949	0.500109	1.32703	30	5759	375	796098	7	GM06990_footprints.txt	blood	footprints	Footprints
1e-08	Fetal_Intestine_Small	1.98504	0.00792	0.68564	0.258201	0.179566	1.19172	22	22653	119	796098	662	UW.Fetal_Intestine_Small.ChromatinAccessibility.H-23887.DS17643.hotspot.twopass.fdr0.01.merge.pks.wig	fetal_intestine,_small	peaks	Peaks
1e-05	HCPEpiC	1.76594	1.51e-05	0.568681	0.131413	0.311112	0.82625	118	58118	375	796098	70	HCPEpiC-DS12447.twopass.merge150.wgt10.zgt2.wig	epithelium	hotspots	Hotspots
1e-08	Fetal_Muscle_Leg	1.78485	0.007978	0.579336	0.218371	0.151328	1.00734	46	80823	119	796098	454	UW.Fetal_Muscle_Leg.ChromatinAccessibility.H-24218.DS19115.twopass.merge150.wgt10.zgt2.wig	fetal_muscle	hotspots	Hotspots
1e-05	Fetal_Placenta	1.91429	1.52e-05	0.649345	0.150126	0.355098	0.943592	70	23953	375	796098	766	UW.Fetal_Placenta.ChromatinAccessibility.H-23914.DS17744.hotspot.twopass.fdr0.01.merge.pks.wig	fetal_placenta	peaks	Peaks
1e-08	Penis_Foreskin_Keratinocyte_Primary_Cells	1.99656	0.008009	0.691428	0.260749	0.18036	1.2025	22	22267	119	796098	885	UW.Penis_Foreskin_Keratinocyte_Primary_Cells.ChromatinAccessibility.skin02.DS18714.hotspot.twopass.fdr0.01.merge.pks.wig	skin	peaks	Peaks
1e-05	AG04450	2.02972	1.54e-05	0.7079	0.16374	0.386968	1.02883	57	16714	375	796098	169	AG04450-DS12270.hotspot.twopass.fdr0.01.merge.pks.bed	lung	peaks	Peaks
1e-08	Stellate	1.77123	0.008205	0.571677	0.216256	0.147814	0.99554	46	73194	119	796098	160	wgEncodeOpenChromDnaseStellateAlnAllReps.30000000.twopass.merge150.wgt10.zgt2.wig	liver	hotspots	Hotspots
1e-05	H1_Derived_Mesenchymal_Stem_Cells	1.96087	1.57e-05	0.673388	0.155927	0.367771	0.979006	62	20659	375	796098	847	UW.H1_Derived_Mesenchymal_Stem_Cells.ChromatinAccessibility.DS20671.hotspot.twopass.fdr0.01.merge.pks.wig	es_cell	peaks	Peaks
1e-08	Fetal_Renal_Pelvis_Right	1.95229	0.008434	0.669004	0.25397	0.171224	1.16678	25	25779	119	796098	798	UW.Fetal_Renal_Pelvis_Right.ChromatinAccessibility.H-24232.DS19235.hotspot.twopass.fdr0.01.merge.pks.wig	fetal_renal_pelvis	peaks	Peaks
1e-05	Fetal_Thymus	1.96558	1.57e-05	0.675786	0.156503	0.369039	0.982532	60	20814	375	796098	823	UW.Fetal_Thymus.ChromatinAccessibility.H-24259.DS19287.hotspot.twopass.fdr0.01.merge.pks.wig	fetal_thymus	peaks	Peaks
1e-08	AoSMC	2.04567	0.008467	0.715725	0.271842	0.182915	1.24853	19	18587	119	796098	255	wgEncodeOpenChromDnaseAosmcSerumfreeAlnAllReps.30000000.hotspot.twopass.fdr0.01.merge.pks.bed	blood_vessel	peaks	Peaks
1e-05	Penis_Foreskin_Fibroblast_Primary_Cells	1.90264	1.59e-05	0.643244	0.149066	0.351075	0.935412	73	25056	375	796098	882	UW.Penis_Foreskin_Fibroblast_Primary_Cells.ChromatinAccessibility.skin02.DS18256.hotspot.twopass.fdr0.01.merge.pks.wig	fibroblast	peaks	Peaks
1e-08	HSMM	1.77968	0.008588	0.576436	0.219343	0.146525	1.00635	57	104498	119	796098	101	HSMM-all.twopass.merge150.wgt10.zgt2.wig	muscle	hotspots	Hotspots
1e-05	HFF-Myc	1.74641	1.6e-05	0.55756	0.129211	0.304306	0.810814	131	68768	375	796098	78	HFF_MyC-DS15079.twopass.merge150.wgt10.zgt2.wig	foreskin	hotspots	Hotspots
1e-08	Fetal_Intestine_Large	1.95067	0.008645	0.668172	0.254465	0.169421	1.16692	23	24206	119	796098	647	UW.Fetal_Intestine_Large.ChromatinAccessibility.H-23887.DS17647.hotspot.twopass.fdr0.01.merge.pks.wig	fetal_intestine,_large	peaks	Peaks
1e-05	Fetal_Muscle_Back	1.72896	1.62e-05	0.547522	0.127005	0.298593	0.796451	135	77480	375	796098	438	UW.Fetal_Muscle_Back.ChromatinAccessibility.H-24078.DS18377.twopass.merge150.wgt10.zgt2.wig	fetal_muscle	hotspots	Hotspots
1e-08	Fetal_Intestine_Small	2.01489	0.008702	0.700567	0.267032	0.177184	1.22395	20	19734	119	796098	665	UW.Fetal_Intestine_Small.ChromatinAccessibility.H-24111.DS18495.hotspot.twopass.fdr0.01.merge.pks.wig	fetal_intestine,_small	peaks	Peaks
1e-05	Fetal_Muscle_Leg	1.76299	1.63e-05	0.567011	0.131554	0.309165	0.824856	113	56650	375	796098	452	UW.Fetal_Muscle_Leg.ChromatinAccessibility.H-24143.DS18844.twopass.merge150.wgt10.zgt2.wig	fetal_muscle	hotspots	Hotspots
1e-08	Fetal_Intestine_Large	1.96331	0.008941	0.674631	0.258053	0.168848	1.18041	22	22763	119	796098	639	UW.Fetal_Intestine_Large.ChromatinAccessibility.H-23524.DS16164.hotspot.twopass.fdr0.01.merge.pks.wig	fetal_intestine,_large	peaks	Peaks
1e-05	Fetal_Muscle_Back	1.90805	1.65e-05	0.646083	0.149968	0.352145	0.940021	70	25495	375	796098	746	UW.Fetal_Muscle_Back.ChromatinAccessibility.H-24409.DS20244.hotspot.twopass.fdr0.01.merge.pks.wig	fetal_muscle	peaks	Peaks
1e-08	HVMF	1.80789	0.009118	0.592158	0.227091	0.14706	1.03726	38	54541	119	796098	106	HVMF-DS13981.twopass.merge150.wgt10.zgt2.wig	connective	hotspots	Hotspots
1e-05	H1_Derived_Mesenchymal_Stem_Cells	1.76138	1.65e-05	0.5661	0.131421	0.308515	0.823685	113	56102	375	796098	548	UW.H1_Derived_Mesenchymal_Stem_Cells.ChromatinAccessibility.DS20671.twopass.merge150.wgt10.zgt2.wig	es_cell	hotspots	Hotspots
1e-08	Fetal_Kidney	1.77203	0.009188	0.572127	0.219628	0.141656	1.0026	45	72853	119	796098	373	UW.Fetal_Kidney.ChromatinAccessibility.H-24507.DS20564.twopass.merge150.wgt10.zgt2.wig	fetal_kidney	hotspots	Hotspots
1e-05	Fetal_Muscle_Leg	1.71594	1.67e-05	0.53996	0.125439	0.294099	0.785821	146	91148	375	796098	455	UW.Fetal_Muscle_Leg.ChromatinAccessibility.H-24244.DS19272.twopass.merge150.wgt10.zgt2.wig	fetal_muscle	hotspots	Hotspots
1e-08	Fetal_Renal_Pelvis	1.76348	0.00932	0.56729	0.218182	0.139653	0.994927	47	78689	119	796098	489	UW.Fetal_Renal_Pelvis.ChromatinAccessibility.H-24078.DS18431.twopass.merge150.wgt10.zgt2.wig	fetal_renal_pelvis	hotspots	Hotspots
1e-05	Fetal_Intestine_Large	1.72635	1.69e-05	0.546006	0.126902	0.297278	0.794735	138	76546	375	796098	342	UW.Fetal_Intestine_Large.ChromatinAccessibility.H-23744.DS17094.twopass.merge150.wgt10.zgt2.wig	fetal_intestine,_large	hotspots	Hotspots
1e-08	HMVEC-dLy-Ad	1.82961	0.009341	0.604104	0.23241	0.14858	1.05963	31	42817	119	796098	87	HMVEC_dLyAd-DS13261.twopass.merge150.wgt10.zgt2.wig	blood_vessel	hotspots	Hotspots
1e-05	Fetal_Intestine_Large	1.73012	1.71e-05	0.548192	0.127477	0.298336	0.798047	135	76061	375	796098	353	UW.Fetal_Intestine_Large.ChromatinAccessibility.H-24111.DS18499.twopass.merge150.wgt10.zgt2.wig	fetal_intestine,_large	hotspots	Hotspots
1e-08	Fetal_Muscle_Upper_Limb_Skeletal	1.9501	0.00956	0.667881	0.257733	0.162724	1.17304	23	24309	119	796098	763	UW.Fetal_Muscle_Upper_Limb_Skeletal.ChromatinAccessibility.H-23887.DS17661.hotspot.twopass.fdr0.01.merge.pks.wig	fetal_muscle	peaks	Peaks
1e-05	HSMM	1.99644	1.77e-05	0.691365	0.161077	0.375653	1.00708	58	18548	375	796098	28	HSMM_footprints.txt	muscle	footprints	Footprints
1e-08	Fetal_Heart	1.8984	0.009562	0.641009	0.247371	0.156163	1.12586	25	29537	119	796098	635	UW.Fetal_Heart.ChromatinAccessibility.H-23663.DS16819.hotspot.twopass.fdr0.01.merge.pks.wig	fetal_heart	peaks	Peaks
1e-05	Fetal_Muscle_Back	1.69817	1.79e-05	0.529553	0.123446	0.287599	0.771507	162	109187	375	796098	435	UW.Fetal_Muscle_Back.ChromatinAccessibility.H-23914.DS17767.twopass.merge150.wgt10.zgt2.wig	fetal_muscle	hotspots	Hotspots
1e-08	Fibrobl	1.82175	0.009663	0.599797	0.231793	0.145483	1.05411	35	42948	119	796098	258	wgEncodeOpenChromDnaseFibroblAlnAllReps.30000000.hotspot.twopass.fdr0.01.merge.pks.bed	skin	peaks	Peaks
1e-05	Caco-2	1.73921	1.82e-05	0.55343	0.12914	0.300315	0.806545	104	54605	375	796098	51	CACO2-DS8235.twopass.merge150.wgt10.zgt2.wig	colon	hotspots	Hotspots
1e-08	Medullo	1.72831	0.00997	0.547146	0.212328	0.130982	0.963309	51	97421	119	796098	152	wgEncodeOpenChromDnaseMedulloAlnAllReps.30000000.twopass.merge150.wgt10.zgt2.wig	brain	hotspots	Hotspots
1e-05	Fibroblasts_Fetal_Skin_Quadriceps_Right	1.76706	1.86e-05	0.569317	0.133001	0.308635	0.829999	111	52682	375	796098	536	UW.Fibroblasts_Fetal_Skin_Quadriceps_Right.ChromatinAccessibility.H-24259.DS19943.twopass.merge150.wgt10.zgt2.wig	fibroblast	hotspots	Hotspots
1e-08	Fetal_Intestine_Small	1.94515	0.010022	0.665338	0.258378	0.158917	1.17176	22	22302	119	796098	657	UW.Fetal_Intestine_Small.ChromatinAccessibility.H-23744.DS17092.hotspot.twopass.fdr0.01.merge.pks.wig	fetal_intestine,_small	peaks	Peaks
1e-05	Fetal_Muscle_Leg	1.86066	1.87e-05	0.620929	0.145083	0.336567	0.905291	79	30410	375	796098	758	UW.Fetal_Muscle_Leg.ChromatinAccessibility.H-24409.DS20239.hotspot.twopass.fdr0.01.merge.pks.wig	fetal_muscle	peaks	Peaks
1e-08	K562	2.16072	0.010119	0.770442	0.299583	0.183261	1.35762	15	13604	119	796098	968	seg_ENHANCER_k562	blood	ENHANCER	Chromatin_States
1e-05	HMVEC-dLy-Neo	1.99476	1.91e-05	0.690522	0.161504	0.373973	1.00707	57	17408	375	796098	212	HMVEC_dLyNeo-DS13150.hotspot.twopass.fdr0.01.merge.pks.bed	blood_vessel	peaks	Peaks
1e-08	Fetal_Kidney_Left	1.74264	0.010187	0.555404	0.21616	0.131731	0.979077	47	76397	119	796098	376	UW.Fetal_Kidney_Left.ChromatinAccessibility.H-23640.DS16805.twopass.merge150.wgt10.zgt2.wig	fetal_kidney	hotspots	Hotspots
1e-05	HUVEC	1.93182	1.93e-05	0.658463	0.154089	0.356449	0.960477	67	22274	375	796098	1003	tfbs_huvec	blood_vessel	tfbs	TFBS
1e-08	PANC-1	1.79271	0.010321	0.583729	0.227586	0.137661	1.0298	38	53764	119	796098	120	PANC1-DS9955.twopass.merge150.wgt10.zgt2.wig	pancreas	hotspots	Hotspots
1e-05	Penis_Foreskin_Keratinocyte_Primary_Cells	1.92743	1.93e-05	0.65619	0.15356	0.355211	0.957168	67	22267	375	796098	885	UW.Penis_Foreskin_Keratinocyte_Primary_Cells.ChromatinAccessibility.skin02.DS18714.hotspot.twopass.fdr0.01.merge.pks.wig	skin	peaks	Peaks
1e-08	HepG2	1.93178	0.010485	0.658441	0.257264	0.154203	1.16268	23	23120	119	796098	198	HepG2-all.fdr0.01.bed	liver	peaks	Peaks
1e-05	Huh-7.5	1.69818	2.04e-05	0.529556	0.124284	0.28596	0.773153	144	82142	375	796098	147	wgEncodeOpenChromDnaseHuh75AlnAllReps.30000000.twopass.merge150.wgt10.zgt2.wig	liver	hotspots	Hotspots
1e-08	iPS_DF_6.9	1.91498	0.010509	0.64971	0.253931	0.152005	1.14742	23	25352	119	796098	860	UW.iPS_DF_6.9.ChromatinAccessibility.DS15164.hotspot.twopass.fdr0.01.merge.pks.wig	ips_cell	peaks	Peaks
1e-05	Fetal_Stomach	1.74665	2.09e-05	0.557698	0.131082	0.300777	0.814618	116	57028	375	796098	509	UW.Fetal_Stomach.ChromatinAccessibility.H-23914.DS17750.twopass.merge150.wgt10.zgt2.wig	fetal_stomach	hotspots	Hotspots
1e-08	HGF	1.7975	0.010868	0.586399	0.23024	0.135128	1.03767	36	48318	119	796098	79	HGF-DS11752.twopass.merge150.wgt10.zgt2.wig	gingival	hotspots	Hotspots
1e-05	Fetal_Muscle_Arm	1.91618	2.12e-05	0.650336	0.152957	0.35054	0.950132	69	23603	375	796098	726	UW.Fetal_Muscle_Arm.ChromatinAccessibility.H-24125.DS18559.hotspot.twopass.fdr0.01.merge.pks.wig	fetal_muscle	peaks	Peaks
1e-08	Fetal_Placenta	1.8988	0.011043	0.64122	0.252315	0.146682	1.13576	25	26064	119	796098	767	UW.Fetal_Placenta.ChromatinAccessibility.H-24272.DS19391.hotspot.twopass.fdr0.01.merge.pks.wig	fetal_placenta	peaks	Peaks
1e-05	Urothelia	1.708	2.14e-05	0.535325	0.125959	0.288446	0.782205	134	76308	375	796098	163	wgEncodeOpenChromDnaseUrotsaUt189AlnAllReps.30000000.twopass.merge150.wgt10.zgt2.wig	urothelium	hotspots	Hotspots
1e-08	HMVEC-dNeo	1.77953	0.011132	0.576348	0.227039	0.131351	1.02134	35	50120	119	796098	89	HMVEC_dNeo-DS12937.twopass.merge150.wgt10.zgt2.wig	blood_vessel	hotspots	Hotspots
1e-05	pHTE	1.69429	2.22e-05	0.527261	0.124312	0.28361	0.770912	152	93226	375	796098	158	wgEncodeOpenChromDnasePhteAlnAllReps.30000000.twopass.merge150.wgt10.zgt2.wig	epithelium	hotspots	Hotspots
1e-08	Fetal_Intestine_Small	1.90696	0.011215	0.645511	0.254546	0.146601	1.14442	23	24966	119	796098	653	UW.Fetal_Intestine_Small.ChromatinAccessibility.H-23604.DS16559.hotspot.twopass.fdr0.01.merge.pks.wig	fetal_intestine,_small	peaks	Peaks
1e-05	Fetal_Placenta	1.71526	2.22e-05	0.539566	0.127225	0.290205	0.788927	132	72290	375	796098	469	UW.Fetal_Placenta.ChromatinAccessibility.H-24409.DS20346.twopass.merge150.wgt10.zgt2.wig	fetal_placenta	hotspots	Hotspots
1e-08	HepG2	1.69602	0.011225	0.528287	0.208346	0.119929	0.936645	37	91660	119	796098	914	H3K27me3_hepg2	liver	H3K27me3	Histone_Modifications
1e-05	Fetal_Stomach	1.70637	2.27e-05	0.534369	0.126141	0.287132	0.781605	139	78033	375	796098	510	UW.Fetal_Stomach.ChromatinAccessibility.H-23964.DS17878.twopass.merge150.wgt10.zgt2.wig	fetal_stomach	hotspots	Hotspots
1e-08	HUVEC	1.79764	0.011237	0.586475	0.231328	0.133072	1.03988	31	50050	119	796098	909	H3K27ac_huvec	blood_vessel	H3K27ac	Histone_Modifications
1e-05	AG09309	1.74778	2.55e-05	0.558346	0.132627	0.298398	0.818294	113	53854	375	796098	45	AG09309-DS12352.twopass.merge150.wgt10.zgt2.wig	skin	hotspots	Hotspots
1e-08	HRGEC	1.77949	0.011249	0.576327	0.22736	0.1307	1.02195	39	55680	119	796098	99	HRGEC-DS13716.twopass.merge150.wgt10.zgt2.wig	kidney	hotspots	Hotspots
1e-05	NH-A	1.73329	2.6e-05	0.550024	0.130776	0.293702	0.806345	121	60944	375	796098	114	NHA-DS12800.twopass.merge150.wgt10.zgt2.wig	nervous	hotspots	Hotspots
1e-08	iPS_DF_6.9	1.74619	0.011315	0.557438	0.220086	0.12607	0.988805	46	74005	119	796098	561	UW.iPS_DF_6.9.ChromatinAccessibility.DS15164.twopass.merge150.wgt10.zgt2.wig	ips_cell	hotspots	Hotspots
1e-05	8988T	1.8891	2.67e-05	0.636099	0.151449	0.339258	0.93294	63	22985	375	796098	254	wgEncodeOpenChromDnase8988tAlnAllReps.30000000.hotspot.twopass.fdr0.01.merge.pks.bed	liver	peaks	Peaks
1e-08	Fetal_Muscle_Back	1.84737	0.011419	0.613763	0.242631	0.138206	1.08932	28	34062	119	796098	736	UW.Fetal_Muscle_Back.ChromatinAccessibility.H-24005.DS18083.hotspot.twopass.fdr0.01.merge.pks.wig	fetal_muscle	peaks	Peaks
1e-05	iPS	1.66411	2.69e-05	0.509289	0.121315	0.271512	0.747067	143	92553	375	796098	149	wgEncodeOpenChromDnaseIpsAlnAllReps.30000000.twopass.merge150.wgt10.zgt2.wig	ips_cell	hotspots	Hotspots
1e-08	NHLF	1.76167	0.011608	0.566259	0.224364	0.126505	1.00601	40	61608	119	796098	118	NHLF-DS12829.twopass.merge150.wgt10.zgt2.wig	lung	hotspots	Hotspots
1e-05	Fibroblasts_Fetal_Skin_Upper_Back	1.73763	2.7e-05	0.55252	0.131634	0.294518	0.810522	119	59521	375	796098	541	UW.Fibroblasts_Fetal_Skin_Upper_Back.ChromatinAccessibility.H-24259.DS19706.twopass.merge150.wgt10.zgt2.wig	fibroblast	hotspots	Hotspots
1e-08	HMVEC-dBl-Neo	1.97654	0.012284	0.681346	0.272116	0.147999	1.21469	19	18535	119	796098	210	HMVEC_dBlNeo-DS13242.hotspot.twopass.fdr0.01.merge.pks.bed	blood_vessel	peaks	Peaks
1e-05	GM12878	1.64231	2.77e-05	0.496104	0.118364	0.26411	0.728098	172	160513	375	796098	981	seg_TRANSCRIBED_gm12878	blood	TRANSCRIBED	Chromatin_States
1e-08	Fetal_Renal_Pelvis	1.85532	0.012325	0.618058	0.246957	0.134023	1.10209	27	29839	119	796098	784	UW.Fetal_Renal_Pelvis.ChromatinAccessibility.H-23790.DS17381.hotspot.twopass.fdr0.01.merge.pks.wig	fetal_renal_pelvis	peaks	Peaks
1e-05	HUVEC	1.73687	2.79e-05	0.552082	0.131758	0.293837	0.810328	89	71073	375	796098	921	H3K36me3_huvec	blood_vessel	H3K36me3	Histone_Modifications
1e-08	HMVEC-dAd	1.75632	0.012326	0.563221	0.225047	0.12213	1.00431	38	55393	119	796098	84	HMVEC_dAd-DS12957.hg19.twopass.merge150.wgt10.zgt2.wig	blood_vessel	hotspots	Hotspots
1e-05	Fetal_Muscle_Trunk	1.88035	2.83e-05	0.631457	0.150831	0.335828	0.927087	70	25097	375	796098	762	UW.Fetal_Muscle_Trunk.ChromatinAccessibility.H-24507.DS20544.hotspot.twopass.fdr0.01.merge.pks.wig	fetal_muscle,_trunk	peaks	Peaks
1e-08	Fetal_Muscle_Arm	1.7326	0.012346	0.549624	0.219666	0.119078	0.980169	45	77411	119	796098	427	UW.Fetal_Muscle_Arm.ChromatinAccessibility.H-24125.DS18559.twopass.merge150.wgt10.zgt2.wig	fetal_muscle	hotspots	Hotspots
1e-05	Fetal_Intestine_Small	1.69959	3.02e-05	0.530389	0.127128	0.281217	0.77956	140	76410	375	796098	363	UW.Fetal_Intestine_Small.ChromatinAccessibility.H-23887.DS17643.twopass.merge150.wgt10.zgt2.wig	fetal_intestine,_small	hotspots	Hotspots
1e-08	Fetal_Lung_Right	1.71777	0.012483	0.541025	0.216568	0.116553	0.965497	48	85828	119	796098	411	UW.Fetal_Lung_Right.ChromatinAccessibility.H-23744.DS17101.twopass.merge150.wgt10.zgt2.wig	fetal_lung	hotspots	Hotspots
1e-05	HConF	1.72958	3.05e-05	0.547879	0.131394	0.290347	0.805412	113	54621	375	796098	69	HConF-DS11642.twopass.merge150.wgt10.zgt2.wig	eye	hotspots	Hotspots
1e-08	HBMEC	1.74518	0.012546	0.55686	0.223066	0.119652	0.994069	42	67578	119	796098	65	HBMEC-DS13817.twopass.merge150.wgt10.zgt2.wig	blood_vessel	hotspots	Hotspots
1e-05	HeLa-S3	0.629507	3.09e-05	-0.46282	0.111076	-0.68053	-0.24511	225	575938	375	796098	977	seg_REPRESSED_helas3	cervix	REPRESSED	Chromatin_States
1e-08	Fetal_Intestine_Large	2.1323	0.012547	0.757202	0.303322	0.162692	1.35171	14	11389	119	796098	646	UW.Fetal_Intestine_Large.ChromatinAccessibility.H-23855.DS17502.hotspot.twopass.fdr0.01.merge.pks.wig	fetal_intestine,_large	peaks	Peaks
1e-05	Fetal_Muscle_Trunk	1.69505	3.14e-05	0.527711	0.12675	0.279282	0.776141	132	74623	375	796098	461	UW.Fetal_Muscle_Trunk.ChromatinAccessibility.H-23941.DS17827.twopass.merge150.wgt10.zgt2.wig	fetal_muscle,_trunk	hotspots	Hotspots
1e-08	HPF	1.76856	0.012664	0.570164	0.228698	0.121916	1.01841	36	50034	119	796098	96	HPF-DS13390.twopass.merge150.wgt10.zgt2.wig	lung	hotspots	Hotspots
1e-05	Fetal_Intestine_Large	1.70442	3.17e-05	0.533223	0.128151	0.282046	0.784399	127	65966	375	796098	345	UW.Fetal_Intestine_Large.ChromatinAccessibility.H-23808.DS17422.twopass.merge150.wgt10.zgt2.wig	fetal_intestine,_large	hotspots	Hotspots
1e-08	PanIsletD	1.89975	0.012878	0.641721	0.258016	0.13601	1.14743	22	23574	119	796098	281	wgEncodeOpenChromDnasePanisdAlnAllReps.30000000.hotspot.twopass.fdr0.01.merge.pks.bed	pancreas	peaks	Peaks
1e-05	Chorion	1.89619	3.19e-05	0.639847	0.153816	0.338368	0.941327	63	21341	375	796098	256	wgEncodeOpenChromDnaseChorionAlnAllReps.30000000.hotspot.twopass.fdr0.01.merge.pks.bed	fetal_membrane	peaks	Peaks
1e-08	HCM	2.07796	0.013011	0.731389	0.294504	0.15416	1.30862	15	13819	119	796098	13	HCM_footprints.txt	heart	footprints	Footprints
1e-05	HMVEC-LLy	1.97391	3.19e-05	0.680017	0.163477	0.359602	1.00043	54	16776	375	796098	215	HMVEC_LLy-DS13185.hotspot.twopass.fdr0.01.merge.pks.bed	blood_vessel	peaks	Peaks
1e-08	FibroP	1.85641	0.013123	0.618643	0.24941	0.129799	1.10749	25	28623	119	796098	259	wgEncodeOpenChromDnaseFibropAlnAllReps.30000000.hotspot.twopass.fdr0.01.merge.pks.bed	skin	peaks	Peaks
1e-05	Fetal_Stomach	1.69267	3.43e-05	0.526307	0.127043	0.277302	0.775312	132	73574	375	796098	506	UW.Fetal_Stomach.ChromatinAccessibility.H-23758.DS17172.twopass.merge150.wgt10.zgt2.wig	fetal_stomach	hotspots	Hotspots
1e-08	Fetal_Adrenal_Gland	1.90234	0.013172	0.643084	0.259403	0.134655	1.15151	23	24606	119	796098	614	UW.Fetal_Adrenal_Gland.ChromatinAccessibility.H-24409.DS20343.hotspot.twopass.fdr0.01.merge.pks.wig	fetal_adrenal_gland	peaks	Peaks
1e-05	HMVEC-dNeo	1.97239	3.69e-05	0.679249	0.164616	0.356601	1.0019	53	16468	375	796098	213	HMVEC_dNeo-DS12937.hotspot.twopass.fdr0.01.merge.pks.bed	blood_vessel	peaks	Peaks
1e-08	Fibroblasts_Fetal_Skin_Quadriceps_Left	1.74679	0.013577	0.55778	0.225981	0.114858	1.0007	40	60046	119	796098	534	UW.Fibroblasts_Fetal_Skin_Quadriceps_Left.ChromatinAccessibility.H-24259.DS20046.twopass.merge150.wgt10.zgt2.wig	fibroblast	hotspots	Hotspots
1e-05	Fetal_Muscle_Arm	1.67953	3.84e-05	0.518516	0.125943	0.271669	0.765364	141	86661	375	796098	426	UW.Fetal_Muscle_Arm.ChromatinAccessibility.H-24111.DS18473.twopass.merge150.wgt10.zgt2.wig	fetal_muscle	hotspots	Hotspots
1e-08	Fetal_Muscle_Back	1.7197	0.013605	0.542149	0.219713	0.111511	0.972787	44	75327	119	796098	443	UW.Fetal_Muscle_Back.ChromatinAccessibility.H-24244.DS19283.twopass.merge150.wgt10.zgt2.wig	fetal_muscle	hotspots	Hotspots
1e-05	iPS_DF_19.7	1.71523	3.84e-05	0.539548	0.131065	0.282661	0.796435	122	58791	375	796098	559	UW.iPS_DF_19.7.ChromatinAccessibility.DS15148.twopass.merge150.wgt10.zgt2.wig	ips_cell	hotspots	Hotspots
1e-08	K562	0.605793	0.013824	-0.50122	0.203597	-0.90027	-0.10217	80	639892	119	796098	980	seg_REPRESSED_k562	blood	REPRESSED	Chromatin_States
1e-05	AG04449	1.73621	3.85e-05	0.551703	0.134027	0.28901	0.814395	110	51574	375	796098	43	AG04449-DS12319.twopass.merge150.wgt10.zgt2.wig	skin	hotspots	Hotspots
1e-08	Fetal_Intestine_Large	1.71261	0.01396	0.538018	0.218859	0.109054	0.966983	45	76546	119	796098	342	UW.Fetal_Intestine_Large.ChromatinAccessibility.H-23744.DS17094.twopass.merge150.wgt10.zgt2.wig	fetal_intestine,_large	hotspots	Hotspots
1e-05	SKMC	1.88709	3.93e-05	0.635036	0.154441	0.332331	0.937741	67	22860	375	796098	250	SkMC-DS11949.hotspot.twopass.fdr0.01.merge.pks.bed	muscle	peaks	Peaks
1e-08	Fetal_Muscle_Lower_Limb_Skeletal	1.80403	0.014054	0.590021	0.240248	0.119136	1.06091	30	36382	119	796098	759	UW.Fetal_Muscle_Lower_Limb_Skeletal.ChromatinAccessibility.H-24042.DS18174.hotspot.twopass.fdr0.01.merge.pks.wig	fetal_muscle,_lower_limb	peaks	Peaks
1e-05	HeLa-S3	2.01856	3.96e-05	0.702383	0.170912	0.367395	1.03737	48	13833	375	796098	268	wgEncodeOpenChromDnaseHelas3Ifna4hAlnAllReps.30000000.hotspot.twopass.fdr0.01.merge.pks.bed	cervix	peaks	Peaks
1e-08	HEEpiC	1.74373	0.014273	0.556026	0.226919	0.111265	1.00079	38	58289	119	796098	72	HEEpiC-DS12763.twopass.merge150.wgt10.zgt2.wig	epithelium	hotspots	Hotspots
1e-05	Fetal_Lung_Right	1.6821	3.98e-05	0.520046	0.126571	0.271968	0.768125	136	78902	375	796098	412	UW.Fetal_Lung_Right.ChromatinAccessibility.H-23758.DS17162.twopass.merge150.wgt10.zgt2.wig	fetal_lung	hotspots	Hotspots
1e-08	Fetal_Intestine_Small	1.70023	0.014358	0.530766	0.216801	0.105836	0.955696	47	79773	119	796098	365	UW.Fetal_Intestine_Small.ChromatinAccessibility.H-23941.DS17808.twopass.merge150.wgt10.zgt2.wig	fetal_intestine,_small	hotspots	Hotspots
1e-05	HPDE6-E6E7	1.7097	4.09e-05	0.536319	0.130729	0.28009	0.792548	117	57485	375	796098	145	wgEncodeOpenChromDnaseHpde6e6e7AlnAllReps.30000000.twopass.merge150.wgt10.zgt2.wig	pancreatic_duct	hotspots	Hotspots
1e-08	Fetal_Lung	1.83587	0.014497	0.607517	0.248504	0.12045	1.09458	26	30191	119	796098	684	UW.Fetal_Lung.ChromatinAccessibility.H-22727.DS12817.hotspot.twopass.fdr0.01.merge.pks.wig	fetal_lung	peaks	Peaks
1e-05	Fetal_Muscle_Arm	1.68181	4.16e-05	0.519869	0.126847	0.271248	0.768489	136	78491	375	796098	423	UW.Fetal_Muscle_Arm.ChromatinAccessibility.H-24042.DS18176.twopass.merge150.wgt10.zgt2.wig	fetal_muscle	hotspots	Hotspots
1e-08	HCFaa	1.73324	0.014975	0.549993	0.226058	0.106919	0.993067	42	63377	119	796098	66	HCFaa-DS13480.twopass.merge150.wgt10.zgt2.wig	heart	hotspots	Hotspots
1e-05	Fetal_Intestine_Large	1.68544	4.26e-05	0.522026	0.127547	0.272034	0.772017	128	67344	375	796098	349	UW.Fetal_Intestine_Large.ChromatinAccessibility.H-23914.DS17748.twopass.merge150.wgt10.zgt2.wig	fetal_intestine,_large	hotspots	Hotspots
1e-08	Fetal_Muscle_Arm	1.70176	0.015004	0.531665	0.218587	0.103235	0.960095	45	76672	119	796098	421	UW.Fetal_Muscle_Arm.ChromatinAccessibility.H-23964.DS17848.twopass.merge150.wgt10.zgt2.wig	fetal_muscle	hotspots	Hotspots
1e-05	Fetal_Placenta	1.66708	4.36e-05	0.511073	0.125025	0.266024	0.756122	154	92509	375	796098	466	UW.Fetal_Placenta.ChromatinAccessibility.H-23887.DS17639.twopass.merge150.wgt10.zgt2.wig	fetal_placenta	hotspots	Hotspots
1e-08	CMK	1.98254	0.01505	0.684377	0.2815	0.132637	1.23612	17	16114	119	796098	179	CMK-DS12393.hotspot.twopass.fdr0.01.merge.pks.bed	blood	peaks	Peaks
1e-05	Fetal_Intestine_Small	1.68494	4.42e-05	0.521727	0.127738	0.271361	0.772094	132	69883	375	796098	359	UW.Fetal_Intestine_Small.ChromatinAccessibility.H-23758.DS17150.twopass.merge150.wgt10.zgt2.wig	fetal_intestine,_small	hotspots	Hotspots
1e-08	Fetal_Stomach	1.69736	0.015197	0.529074	0.217936	0.10192	0.956228	46	76040	119	796098	512	UW.Fetal_Stomach.ChromatinAccessibility.H-24078.DS18389.twopass.merge150.wgt10.zgt2.wig	fetal_stomach	hotspots	Hotspots
1e-05	Fetal_Muscle_Upper_Trunk	1.67241	4.49e-05	0.514264	0.126024	0.267257	0.76127	147	88915	375	796098	465	UW.Fetal_Muscle_Upper_Trunk.ChromatinAccessibility.H-23887.DS17664.twopass.merge150.wgt10.zgt2.wig	fetal_muscle,_upper_trunk	hotspots	Hotspots
1e-08	Fetal_Lung_Left	1.87094	0.015231	0.626441	0.258131	0.120504	1.13238	22	24636	119	796098	701	UW.Fetal_Lung_Left.ChromatinAccessibility.H-23887.DS17674.hotspot.twopass.fdr0.01.merge.pks.wig	fetal_lung	peaks	Peaks
1e-05	Fetal_Muscle_Upper_Trunk	1.82512	4.63e-05	0.601648	0.147688	0.31218	0.891116	74	28432	375	796098	764	UW.Fetal_Muscle_Upper_Trunk.ChromatinAccessibility.H-23887.DS17664.hotspot.twopass.fdr0.01.merge.pks.wig	fetal_muscle,_upper_trunk	peaks	Peaks
1e-08	Fibroblasts_Fetal_Skin_Biceps_Right	1.73836	0.015286	0.55294	0.227966	0.106127	0.999754	38	54885	119	796098	533	UW.Fibroblasts_Fetal_Skin_Biceps_Right.ChromatinAccessibility.H-24259.DS19761.twopass.merge150.wgt10.zgt2.wig	fibroblast	hotspots	Hotspots
1e-05	IMR90	1.85602	4.85e-05	0.618437	0.152218	0.320089	0.916784	72	24149	375	796098	855	UW.IMR90.ChromatinAccessibility.DS13219.hotspot.twopass.fdr0.01.merge.pks.wig	lung	peaks	Peaks
1e-08	HPAF	1.72596	0.015298	0.545784	0.225044	0.104699	0.98687	39	57932	119	796098	94	HPAF-DS13411.twopass.merge150.wgt10.zgt2.wig	blood_vessel	hotspots	Hotspots
1e-05	HVMF	2.00206	5.07e-05	0.694177	0.171299	0.35843	1.02992	49	14468	375	796098	29	HVMF_footprints.txt	connective	footprints	Footprints
1e-08	Fetal_Muscle_Leg	1.84703	0.015691	0.613578	0.253962	0.115813	1.11134	24	27804	119	796098	750	UW.Fetal_Muscle_Leg.ChromatinAccessibility.H-24111.DS18471.hotspot.twopass.fdr0.01.merge.pks.wig	fetal_muscle	peaks	Peaks
1e-05	Fibroblasts_Fetal_Skin_Quadriceps_Left	1.86261	5.17e-05	0.621976	0.153653	0.320816	0.923137	69	24080	375	796098	833	UW.Fibroblasts_Fetal_Skin_Quadriceps_Left.ChromatinAccessibility.H-24259.DS20046.hotspot.twopass.fdr0.01.merge.pks.wig	fibroblast	peaks	Peaks
1e-08	HIPEpiC	1.87333	0.016157	0.627717	0.260966	0.116223	1.13921	24	24014	119	796098	204	HIPEpiC-DS12684.hotspot.twopass.fdr0.01.merge.pks.bed	epithelium	peaks	Peaks
1e-05	Fetal_Intestine_Small	1.67384	5.37e-05	0.515119	0.127535	0.26515	0.765088	128	69317	375	796098	358	UW.Fetal_Intestine_Small.ChromatinAccessibility.H-23744.DS17092.twopass.merge150.wgt10.zgt2.wig	fetal_intestine,_small	hotspots	Hotspots
1e-08	Fetal_Muscle_Back	1.87777	0.016291	0.630087	0.262281	0.116016	1.14416	21	23938	119	796098	740	UW.Fetal_Muscle_Back.ChromatinAccessibility.H-24143.DS18842.hotspot.twopass.fdr0.01.merge.pks.wig	fetal_muscle	peaks	Peaks
1e-05	Fetal_Lung_Right	1.81215	5.44e-05	0.594514	0.147306	0.305793	0.883234	74	28288	375	796098	712	UW.Fetal_Lung_Right.ChromatinAccessibility.H-23887.DS17670.hotspot.twopass.fdr0.01.merge.pks.wig	fetal_lung	peaks	Peaks
[truncated: 1,277 more rows]

## Sheet: Supplementary Data 8
Supplementary Data 8. MAGMA GTEx gene expression enrichment. Beta, SE and two-sided P for gene expression enrichment are reported for each tissue type tested in the GTEx ver.8 dataset.
[truncated: 55 more rows]

[truncated: 5 more sheets: Supplementary Data 9, Supplementary Data 10, Supplementary Data 11, Supplementary Data 12, Supplementary Data 13]
